# Supplementary material for: S-nitrosylated Proteins Involved in Autophagy in <em>Triticum aestivum</em> Roots: A Bottom-Up Proteomics Approach and In Silico Predictive Algorithms
Source: Preprints.org preprint supplement (doi:10.20944/preprints202308.1129.v1), 2023-08-18
Supplement: Supplementary file 1 [file Figure S1-2.docx]

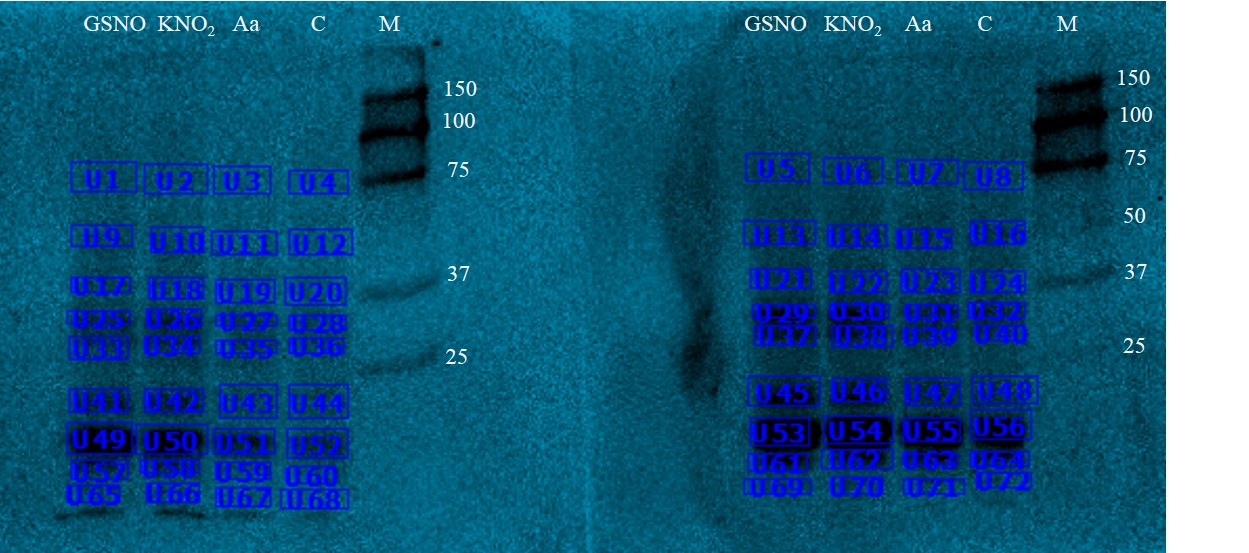


**Figure S1.** Visualization of S-nitrosylated proteins by Western blot. Protein bands that were excised from the gel and subjected to in-gel trypsin cleavage for protein identification are marked on the blot.


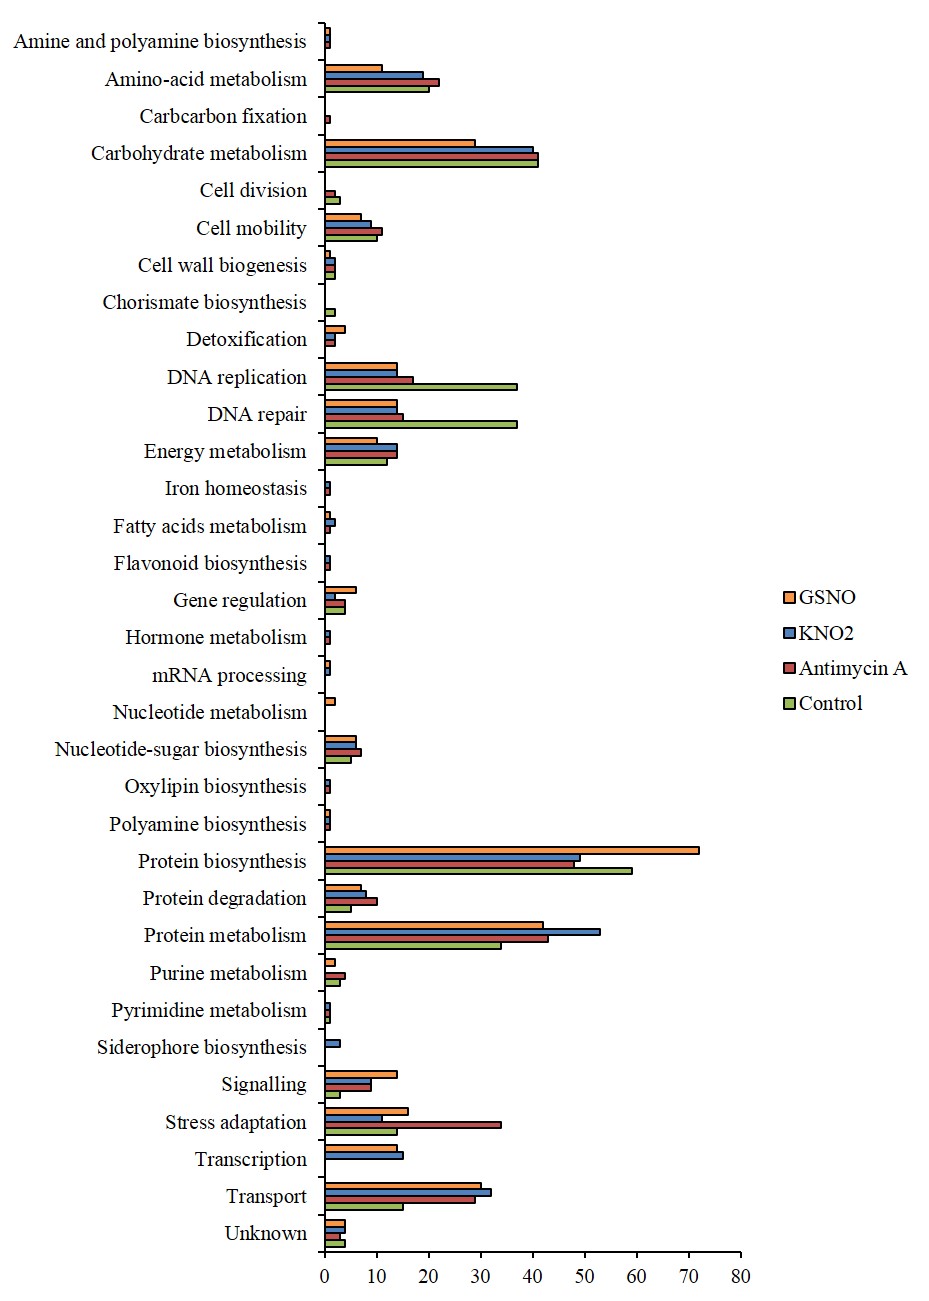


**Figure S2.** Functional annotation of 298 proteins identified proteins.
