# Supplementary material for: S-nitrosylated Proteins Involved in Autophagy in <em>Triticum aestivum</em> Roots: A Bottom-Up Proteomics Approach and In Silico Predictive Algorithms
Source: Preprints.org preprint supplement (doi:10.20944/preprints202308.1129.v1), 2023-08-18
Supplement: Supplementary file 2 [file Table S4 Peptides, proteins, and protein groups, identified in Triticum aestivum.xls]

## Sheet: Directory
S-nitrosylated proteins involved in autophagy in Triticum aestivum roots: a bottom-up proteomics approach and in silico predictive algorithms
Supporting information 4: Peptides, proteins, and protein groups identified in Triticum aestivum
Anastasia Mazina 1, Julia Shumilina 2, Natalia Gazizova 1, Egor Repkin 3, Andrej Frolov 2 and Farida Minibayeva 1,4*
1	Kazan Institute of Biochemistry and Biophysics, FRC Kazan Scientific Center, Russian Academy of Sciences, Kazan, Russian Federation;
2	Laboratory of Analytical Biochemistry and Biotechnology, Timiryazev Institute of Plant Physiology, Russian Academy of Sciences;
3	Saint Petersburg State University, 199034 Saint Petersburg, Russia;
4	Open Lab ‘Biomarker’, Kazan (Volga Region) Federal University, 420008 Kazan, Russia
*Corresponding authors: Farida Minibayeva
Directory
Table S4-1	List of peptides identified in protein extracts isolated from Triticum aestivum
Table S4-2	List of proteins identified in protein extracts isolated from Triticum aestivum
Table S4-3	List of protein groups dentified in protein extracts isolated from Triticum aestivum

## Sheet:  Table S4-1
Table S2-1 List of peptides identified in protein extracts, isolated from Triticum aestivum
Peptide	-10lgP	Mass	Length	ppm	m/z	RT	Area
							Control-1	Antimycin A-1	NO2-1	GSNO-1	Control-2	Antimycin A-2	NO2-2	GSNO-2	Control-3	Antimycin A-3	NO2-3	Antimycin A-4	GSNO-3	Control-4	Antimycin A-5	NO2-4	GSNO-4	Control-5	Antimycin A-6	NO2-5	GSNO-5	Control-6	NO2-6	Antimycin A-7	NO2-7	GSNO-6	Control-7	Antimycin A-8	NO2-8	GSNO-7	Control-8	Antimycin A-9	NO2-9	GSNO-8	GSNO-9	Control-9	Antimycin A-10	NO2-10	GSNO-10	Control-10	Antimycin A-11	NO2-11	GSNO-11
GRDHTVSATHGDMDQNTR	141.03	1996.88	18	1	500.224	10.6					268140							38293
KGENDLPGLTDTEKPR	134	1768.9	16	1.8	590.638	13.61				413120				485130		630070	6024.6		164020					378380			971790	5229.8				5783.6								660330									101200
THINIVVIGHVDSGK	132.52	1587.87	15	0.5	794.94	15.91					192470							8146.9					1520.4						5702.3		12029												7246.9
VAPEEHPVLLTEAPLNPK	130.38	1953.06	18	1.4	652.024	17.76		28127	52589	152350	5119.4	268290	0	0	75273	89212		45788	0	31925		194840	12454	119010			202260					173490		311950	32594	4593.8	17164		29946	0					78226		145790	22105	14249
SPASDTYVIFGEAK	130.34	1483.72	14	-0.9	742.863	18.78		93783	46332	86318				72574	75960	88490	115710		38451	44800				93773			155880					99266			17238					77857								12929	59516
VETGVIKPGMVVTFGPTGLTTEVK	127.65	2459.33	24	-1.3	820.784	20.86															19518										296440		4947.5					9294.8	1162.5				22901
GIYAYGFEKPSAIQQR	127.14	1826.93	16	1.3	914.47	16.61					522980		38699					483050									24459				16456	13071					22107		56815				111570
YYC(+57.02)TVIDAPGHR	126.85	1450.67	12	-0.3	726.337	14.43	2742.2		23237	81521	714290	0	102230		13957			1216900		10401				42817			81038				6275.3	21487		4018.4					4488.9	78674									56454
GLDVIQQAQSGTGK	125.55	1400.73	14	0.2	701.367	15.55			20034	42021	469540		185990			34526	16585	1020100						33978							2189.1	42083				21150	34816		115770				24265		4450.7		72560
LYQM(+15.99)QESGTLLFPAINVNDSVTK	123.08	2583.29	23	-0.1	1292.65	21.83	26004														74693								168170				39302									40333
HTPGTFTNQMQTSFSEPR	122.78	2064.93	18	0.6	689.316	15.62				27111				65890	11839		50153		0			10740		19380			30484					21368								94584					2550.8		11850		21398
SGGGGGGGGC(+57.02)GGGGGVSSLR	122.66	1548.67	20	9.4	775.346	12.05			0			5259.3
FDVGNVVMVTGGR	122.37	1349.68	13	-0.4	675.842	19.61				190560						138050			0					143890			395900					279960																10483
AAAEYDLPLVGNK	121.57	1359.7	13	0.5	680.856	18.57		43776	23428						23876		60008			33966
TNAENEFVTIKK	120.52	1392.72	12	0.6	697.367	14.13			59530			56663				30903	27629	93063	201350	36824				74501																76261									29376
AGKFPTLVSHQESLESK	119.62	1856.96	17	0.6	619.992	14.5								178900					56929																					193060									66574
SKAEAESLYQSK	117.07	1339.66	12	0.3	670.835	11.76			70779	20726		52108	23558	47004	41003	23732	57138	115540	273640	63735				0			0													96063									77827
NIEYLTLGVDDQPLFHGR	116.27	2086.05	18	1.2	1044.03	20.82	4200.3														35764												7255
GGSGGSHGGGSGFGGESGGSYGGGEEASGSGGGYGGGSGK	116.02	3222.27	40	3.9	1075.1	12.18			49398		20111	19497	21494		24890	11300		28272	7260.5	17903		2944.9		21795			5432.5													30968
EGAADPTFLYFAHGLK	115.94	1735.86	16	1	579.624	20.75									5630.2		34873
SQYEQLAEQNRK	115.55	1492.73	12	-1.1	747.366	11.99		20836	28356	58891	21198		38629			31151	39735	101110	715310	21776	2050	48040		49569			56353													134120									87882
FAQYTGANAIAGR	115.47	1338.67	13	-0.3	670.339	15.03		221260	262080	0		72737	23313	187080	167300	115330	235040		174170	152150		54262		123340								133540		51158						134130							0		103360
ILASGVHVVVGTPGR	115.28	1460.85	15	0.4	731.427	15.98				8745.3	389960		0					364080									5753.4				10625								59492								0
TYISGDGITKDDVK	114.5	1510.75	14	0.3	756.38	13.58				394320						527480								366530			746630					2789.7								10859
GIPYLNTYDGR	114.33	1267.62	11	-0.6	634.813	18.13			15972	1065100					0	1111300			35299					891270			1242500					1194400		32796	15042					41312								175400	34201
VDLLNQEIEFLK	113.77	1459.79	12	-1.4	730.902	22.61																																						77522
AGKFPTLVSHQESLEAK	113.42	1840.97	17	2.2	614.662	14.69								148270					31073																					112360									50269
DSTTASASLANSDLPGPSSSR	113.37	2019.93	21	2.7	1010.97	15.63				350650						230030								250930			293240					256800
FVIGGPHGDAGLTGR	112.8	1452.75	15	-1.4	727.38	16.05				99756		36075	289120																					60868		15836	45384		177620	53651							387950
TVGHTVTSPNDTVQQC(+57.02)K	112.15	1870.88	17	2	624.634	11.46								122910					62880																					89148									60465
ELAEDGYSGVEVR	111.85	1422.66	13	-1.2	712.335	15.21		0	0	153460					35181	139110	38459		891980	30375				341930			334440					123500								1289000									1360300
HGGGGGGFGGGGFGSR	111.72	1319.58	16	0.9	440.864	12.9		6580.3	18432			8101.6		5339.4			18454		194970	0
GFSSGSAVVSGGSR	111.16	1253.6	14	0.7	627.805	13.17		20266	33856	0	13280	48016	19206	28338		15870	40196	25394	350690	14664		16685												0						0									8964.6
GSSSGGGYSSGSSSYGSGGR	111.03	1739.7	20	2.2	870.854	11.11		0	0	2926.8		3338.1	0	0		2042.5			0	5287.4				1731																5912.3
DSVVALGGPSWTVPLGR	110.98	1709.91	17	-0.7	855.957	22.09				145420						90687								140210			294820					137450		6406.8														8087.1
HTPGTFTNQM(+15.99)QTSFSEPR	110.7	2080.93	18	1.2	694.648	13.81		114470	132920	47642		31142		151930	92461	44498	115020		153660	57906		22536		51294			62816							7913.1						182430
FYSLPALNDPR	110.41	1291.66	11	1.5	646.836	19.58																	63028		0			43052										6897.3
VAC(+57.02)IGAWHPAR	109.5	1236.62	11	-0.2	619.316	15.07					36098		167950					59061																			7946.9		70934								46133
NAANEAAQISIGK	109.14	1285.66	13	1	643.837	14.6		47187	40659					51622	36598		52684			24081																				0
M(+15.99)FVLDEADEMLSR	109.01	1570.7	13	0	786.354	20.66					60188							15479													115060								5095.9
GMLTGPVTILNWSFVR	107.97	1789.95	16	-0.5	895.984	25.76																				6399.9				12592														81839		13575
FSSC(+57.02)GGGGGSFGAGGGFGSR	107.8	1764.73	20	1.5	883.368	15.65		8670.2	23513	25582	24635		0	14333	10710			58862	33274	22231				6978.8			15628					9689.6								48507							17790
FPTLVSHQESLESK	107.21	1600.81	14	-1.8	801.411	15.96								542460					343210																32056					485320									520130
VHAC(+57.02)VGGTSVR	107.01	1141.57	11	0.9	571.788	11.26					70170		30473					200490
FALESFWDGK	106.73	1198.57	10	-1.2	600.289	21.99																																						684750
AADLTYWESAAR	106.56	1352.64	12	-0.1	677.322	18.31	12909	24941	19187	27704	507780	42700	292620		12484		44322	573140	11820	14164	19306	38937	10922	26296			0	8853.5	38452		20275			24885		34388	89937	764.72	152350	18881		10985	158300		9568.4	4358.5	373700	4422.3	0
VQQLLQDFFNGK	105.8	1435.75	12	-0.3	718.88	21.83					16907																			85542											60692			110960
EHALLAFTLGVK	105.67	1297.74	12	-1.6	649.876	20.41																									193740												0
GIVDSEDLPLNISR	105.17	1526.79	14	0.4	764.404	19.78	6250.1				54048							0					10723			76876				118730											37429			164330	9171.2	98100
TVGGGDDAFNTFFSETGAGK	104.98	1976.88	20	1.4	989.441	20.76	32416				108840							102870	2440		51923	7806.7	16296	13483	12256	6496.2		16109	84146	10372	50129					4483.9		28870	7358.1	8553.3		51737		14323			11637
YEELQITAGR	104.94	1178.59	10	3	590.303	15.74		42195	74273		64567	133330	57882	96318			83415	127930	275590	85333		33232		76309				7561.9				54302		147030						144810			7603.9			8894.6	59355		113450
DVTELIGNTPLVYLNK	104.48	1787.97	16	-5.5	894.99	23.89						14953										0
LAANAFLAQR	104.34	1073.6	10	0.5	537.804	17.19	18896			55829	600350	0	433640			0		824390	39801		19189	0	8301.8	43941	5607.2		0	7276.7	35401		14635	44589		0		160220	119560		312000	53229		20906	185530	1180.3	0		528250	9273.4
ALEESNYELEGK	103.79	1380.64	12	0.5	691.325	14.36		35491	65300		56996	0	45924	63740		32238	96716	128720	774340	0	6383.2	32016		40787			45781					10360		12237						175990									73304
ESTLHLVLR	103.4	1066.61	9	1.2	534.313	16.6		41349		93591	22729		17451	28356	55876	55670	84635			23957		20837	16350	68405	11856	8894.8	136920	14941		10295		182550		26119	4690.8			2148.6		21413	1618.2
NHYVEGGDAGNR	103.25	1287.56	12	1.5	644.786	10.64		6814.1	18988					178250	0		5997.3		146140	8981.6																				139700									53130
SGGGGGGGLGSGGSIR	103.22	1231.59	16	1.7	616.801	12.31		0	123500	47043		91379	54505	54147	0	57636	0	104780	33763	119470		0		64317			40363													95560									61622
FAGGLYTTSVEAFIPNTGR	102.95	2000	19	0.1	1001	21.83															24845								41002				8312.4									21947
RLYQM(+15.99)QESGTLLFPAINVNDSVTK	102.83	2739.39	24	1.4	914.135	20.34																							0
NVYYGVAPVAQK	102.79	1307.69	12	1.4	654.849	15.76				80062				37096		22162								56250			80713													71751								11457
GYVASNSKDDPAK	102.75	1350.64	13	1	676.326	10.81			0	12588	82546		38576	7913.2				151600	0					6551			14655													11704
VQLLEIAQVPDEHVNEFK	102.68	2107.09	18	2	703.371	19.8	111010				2895.1										191410								152620		25483		32676									113620	17770
FTQANSEVSALLGR	102.61	1491.77	14	-0.4	746.888	19.13	56753														79839			0					83967													40325
FDVGNVVM(+15.99)VTGGR	102.49	1365.67	13	0.1	683.84	18.49				218780						169790			0					185430			256160					299530																20361
GALDGGLDIPHSDKR	102.48	1549.78	15	0	775.896	14.67						955060										946710												388280
M(+15.99)TNFYTNFQVDEIGR	102.33	1849.83	15	1	925.92	19.69	6631.4																						13087
SKEEAEALYHSK	102.31	1390.67	12	1.7	464.563	11.34											18169		329710																					17052									10333
EAELANSFIGTTK	101.81	1379.69	13	0.7	690.851	17.43					0		0					142410																					14117				36839
VVSSM(+15.99)FNTVSGK	101.74	1270.62	12	1.2	636.316	13.69					164580		186110			0		309470											5360.4
LAPTIGISVDHR	101.48	1277.71	12	0.7	639.859	16.1				185270						81606								106420			239750					247930																23241
GFVASNSKDDPAK	101.45	1334.65	13	-0.1	668.327	11.46		26954			418420		113660	18080	16031			1516900																						41825									14872
FPTLVSHQESLEAK	101.4	1584.81	14	1.7	529.277	16.06								207680					174310																11038					256970									321640
GM(+15.99)LTGPVTILNWSFVR	101.34	1805.95	16	-1.5	903.981	24.82																				16440															17329			163340		26619
HITIFSPEGR	101.26	1155.6	10	-1.5	578.808	15.96								254820					147180																12875					237270									228950
AQIWDTAGQER	101.18	1273.61	11	0.9	637.807	15.25		262250	175400	44337				123370	109530	48281	266250		105600	205940				0			72726					54227								39773									40410
AQLWDTAGQER	101.18	1273.61	11	0.9	637.807	15.25		262250	175400	44337				123370	109530	48281	266250		105600	205940				0			72726					54227								39773									40410
THNLEPYFESFINNLR	100.9	1992.97	16	-1.4	997.491	22.95																																						45179
NQTVDLVLTAHPTQSVR	100.86	1878	17	-1.1	940.004	16.88																	15801		9311.7			12812
IGYSMITDAEEK	100.83	1355.63	12	-0.5	678.818	16.82		9250.5				211980										130870												116670
GLC(+57.02)AIAQAESLR	100.68	1287.66	12	-0.4	644.835	17.45								398820		20352			259850					65717			71855								86384					433650								22518	369080
FLEQQNQVLQTK	100.64	1474.78	12	0.2	738.393	15.31		53874	166110	0	77748	127330	44249	79015	43075	0	102030	260890	574330	93488		54968		0			0	6814.2	10353			0		116670						202540							53318		97328
LPLQDVYK	100.63	974.544	8	-0.6	488.276	16.67				120810	1195500	214220	312430			66937		3341700				137550		61844			69309				59166	87108				63761	64767		156520				862530		25970		246460
AM(+15.99)IGQVAGGGR	100.55	1031.52	11	0.2	516.764	12.12				683090				17450		656700	27338			19777				470460			768550
QTVSC(+57.02)ADILTVAAR	100.51	1503.77	14	-1.2	752.888	18.46				310570						227670								385290			285480					187830																24085
TIKDEGFGSLWR	100.37	1407.71	12	0.1	704.861	18.45				312850						126850								205500			383970					269420																39975
M(+15.99)GNIAPLTGTQGQIR	100.08	1571.81	15	0.5	786.909	15.74				426570						240010								334040			302560					285860		5391.2
GGSGGSYGGGGSGGGYGGGSGSR	99.85	1790.72	23	2.2	896.365	11.07		18257	55584	16996		19317	17569	10499	21664	14196	18800		12663	20093				23361			10742													31708									0
GGPGKPLHLTATVR	99.66	1402.8	14	1	468.608	12.87																					73419													48705
VC(+57.02)ENIPIVLC(+57.02)GNK	99.57	1514.76	13	-0.3	758.384	18.56				0					38215	0								87308			0					86308			46093					189850								12206
ATGAYSHSQGIK	99.45	1218.6	12	1.3	610.305	10.76					109670							165370						4242.2
SLLEGEGSSGGGGR	99.24	1261.59	14	-3.1	631.798	13.42		62508	71179			42946		12543	60827	0	50789	42938	209400	40453	2491.2			0			0													20027									6710.3
SIPSIVELDSLK	99.23	1299.73	12	-2.2	650.872	21.15	63379														0								80552				27170									31432
TASNEAVQVDIGKK	99.17	1458.77	14	0.5	730.388	13.04				74747				12738		58839								60338			0													20346
KVAC(+57.02)IGAWHPAR	99.12	1364.71	12	1.2	455.91	13.39					78669
IDGLVSGIGTGGTITGTGK	98.99	1702.91	19	-0.3	852.462	18.18						175180										137620												242180											50227
TSPQWLGPQIEVIR	98.92	1622.88	14	-1.4	812.445	21.01																				144170				157900											76344			196760
DYFGAHTYER	98.83	1257.54	10	0.2	629.775	14.15					435720							571930													3742.5
GC(+57.02)EVIVSGK	98.72	947.475	9	0	474.742	12.72								283150					147690					43459																154870									55905
HGSLGFLPR	98.45	982.535	9	0.3	492.272	16.15					419810		477930					132490													5531.4	0					88278		329110								362540
FLNASVGFGGSC(+57.02)FQK	98.44	1617.76	15	1.1	809.885	18.92					205280							0
YAGDSDLQLER	98.38	1265.59	11	1.4	633.8	14.74	4864.6				106920	41484	66540					255330				26313					9218		10049					18570					27213								13242
ENVSSEALEAAR	98.27	1274.61	12	-0.3	638.309	14.33		784430	852460			0	13973	95697	497230		886060		103400	547650		0																		55211									38891
FSVSPVVR	98.18	889.502	8	-3.4	445.757	16.28												0			0		59493					38479	10860									5304.7	9191.1			4509.7	0
LLIQNQDEMIK	98.08	1343.71	11	-0.5	672.86	17.02				727310						677400								488740			660010					786180								12807								70148
LLIQNQDEMLK	98.08	1343.71	11	-0.5	672.86	17.02				727310						677400								488740			660010					786180								12807								70148
TQDGGTEVVEAK	97.79	1232.59	12	0.3	617.299	11.66						509490										475180
VLVVANPANTNALILK	97.58	1648.99	16	-0.8	825.5	20.36						55727										81090												153870											38017
GPTPEPLC(+57.02)QVMLR	97.57	1496.75	13	-1	749.377	19.44						109510										93715												151050											37481
GGSISGGGYGSGGGK	97.5	1196.54	15	2.1	599.277	11.28			25578			0		15580		12245	18547		186310					22474																									0
VVSSMFNTVSGK	97.47	1254.63	12	1.1	628.319	16.59					264430		0					350740													5800.2					16815	21202		86725				62386				0
ISATSIYFESLPYK	97.27	1617.83	14	-0.9	809.918	20.81					77234										81562								52080		176500		8645									40198	26479
DHTVSATHGDMDQNTR	97.23	1783.75	16	2.1	595.59	10.87					109290		26991					132140
TAAENDFVTLKK	97.21	1335.7	12	0.6	668.856	14.44													347640
IYGGDTNINTAFATSLK	97.18	1784.89	17	1	893.451	19.02				211170						103630								193680			218000					165630
VTGGEVGAASSLAPK	96.97	1342.71	15	0.8	672.36	14.5		5305							99457		31006			13994
AGAGSATLSMAYAAAR	96.82	1467.71	16	0.8	734.861	17.1						106740										116570												101770											14011
SSLDAFQQILKK	96.7	1376.77	12	-0.6	689.39	19.28				81103						321490								74915			161960					151390
DHTVSATHGDM(+15.99)DQNTR	96.61	1799.75	16	2.6	600.922	10.48					92806		42348					147840	5528.4
SVQM(+15.99)EGLTWGASK	96.55	1408.67	13	0.4	705.337	16.05				247740						301280								214320			329360					274540																0
MGNIAPLTGTQGQIR	96.38	1555.81	15	0.3	778.911	16.91				385860						261070								286360			365720					303020																24338
APGGAPANVAC(+57.02)AITK	96.35	1396.71	15	0.4	699.361	15.19						242680										250190												174700
IVEGVLSHQLK	96.22	1221.71	11	1	611.859	14.91					81870	115110						162400				79797												108070
GYSFTTTAER	96.09	1131.52	10	0.9	566.765	14.41		73259	83285	171370		241940	48644	103460	64307	136600	80772		84872	61514		198920	3349.2	141070	2727.9		185710					84025		79906					3197.6	104000									81434
FYC(+57.02)WDTAGQEK	96.03	1403.58	11	0.6	702.795	16.53		9216.2		97272				163440		85533			39563					98958			249940					95252			10171					76456								25514	85081
NLDLDSIIAEVK	95.97	1328.72	12	-3.1	665.365	23.21																																						657290
YEEMVEFMEK	95.96	1333.56	10	0	667.783	18.7				129360						141850								121780			200310					113880																14794
LRGQAAASAAK	95.9	1042.59	11	1.3	522.299	10.38				95665						241710								219770			77722
ALLDEM(+15.99)AVVATEEYR	95.64	1724.83	15	-3.2	863.419	18.63																	40064
GKDSVC(+57.02)VVTQK	95.55	1219.62	11	1.2	610.817	11.46								107930					77073																					0									76371
VVDIVDTFR	95.47	1062.57	9	-0.8	532.29	19.32		261830	169520						214840		426700			135010
FVSTTYSGVTR	95.46	1216.61	11	2	609.31	14.17
GSRGGSGGSYGGGGSGGGYGGGSGSR	95.38	2090.88	26	2.5	697.964	10.64		2846.7				0																												0
VPTVDVSVVDLTVR	95.25	1497.84	14	-5.2	749.923	21.02		3018.7		14495		9331.9			0	5827.1	5054.4		5636.4			10317		0			17292	17414				9023.7													5564.2
AASFNIIPSSTGAAK	95.25	1433.75	15	0.1	717.88	17.99		85808	97725	161190		323120	46092	66077	79985	163360	78340		53010	48639		270700		156130			173290					163070		295490	22030					104640					56273				104660
YLFAGVVDGR	95.2	1095.57	10	-1.6	548.792	19.28						0													0	374140		0		428830				0							139760	9347.4		574970	13223	485200
AVTFSDLHTADGLK	95.13	1473.75	14	-0.6	737.877	16.43				189400						215060								138080								368310
AC(+57.02)YGVLR	94.92	837.417	7	1.6	419.715	14.3								319690					128110					28428			31170													169360									241680
LLIQNQDEM(+15.99)IK	94.89	1359.71	11	-0.1	680.857	15.48				910010						879610								773810			791450					1136400																30701
LLIQNQDEM(+15.99)LK	94.89	1359.71	11	-0.1	680.857	15.48				910010						879610								773810			791450					1136400																30701
IIEHNILVVSK	94.79	1263.76	11	-1.1	632.884	15.85					41626							28197																					19836
VVDALGVPIDGK	94.72	1181.67	12	0.4	591.838	18.09	86336	30090												18025	59972								103720													27795					15093
SQYEQLAEQNR	94.53	1364.63	11	1.3	683.321	13.02			0			0	15966	9311.4			22816	24474	97353	11729		5672.8		13504			0													21721
AGEDADSLGLTGHER	94.48	1526.7	15	-4.1	764.352	13.59																	12822					10030
LNLPILPTTTIGSFPQTVELR	94.4	2309.3	21	5.8	1155.66	24.65																				10867				22271											16935			93070
VPDPESTDNPEFK	94.38	1473.66	13	0.3	737.836	14.4	41924				60170	11124				14396		57237			39534								75444
IISSIEQKEESR	94.22	1417.74	12	-1.4	709.873	12.24			7350.5	2144000		5137.8		93432	7133.9	1936200			93664			5591		1084300			2476900	4540.1												188170									115810
FGYELEAIAGQER	94.09	1481.71	13	-0.7	741.864	19.23																																						0
IINEPTAAAIAYGLDKK	94.07	1786.98	17	-4.3	894.495	18.46				0					0	0			5751.3							131170	0			126000											10424			79981		6922.6	0
LDTGNFSWGSEAVTR	94.05	1638.76	15	0	820.385	18.53				209690						340470	0							209900			599820	10672				481450
SLNNQFASFIDK	94.03	1382.68	12	-0.3	692.345	19.77		6883	25147			21686	8430.9	0	14876		3467.8	76540	86767	16897	18913	11011		25526			15479		21612			22331		26061				769.36	4592.6	48031				136300	11030	10611	39952		25778
SGKVPDPESTDNPEFK	94.01	1745.81	16	1.6	582.942	13.42	31567			20560								0			22650			17240			11154		33328
MIPTKPMVVETFATYPPLGR	93.94	2247.18	20	-1.4	750.066	20.92					118100							69003			23967								32936		381440												27839
GVLLYGPPGTGK	93.82	1157.64	12	-1.2	579.829	17.72			9287.8	58010	48008		23980			33583		105260	4716.1	4651.4				40876													13038			12339			33867		2762.2		71615	6910.3
LPANLVQAQR	93.81	1108.64	10	1.4	555.323	15.17					84953							177790													1650.9								13329
YLEDVIAHK	93.72	1086.57	9	1	544.291	15.71									275280		99729
LLIC(+57.02)GGSAYPR	93.69	1205.62	11	1.5	603.817	16.17	12648				119950							390200											19359		4266.8											5211.1	89408
VAVVC(+57.02)GYGDVGK	93.67	1222.6	12	0.4	612.306	14.94	50569																						74429
MIPTKPM(+15.99)VVETFATYPPLGR	93.58	2263.17	20	-1.3	755.398	19.85					118820							102170													614340												34294
VAYALAQGLK	93.47	1032.6	10	0.1	517.303	16.69		929620	942550					642010	551020		709880		546060	377720															95041					202180									167500
EAFPGDVFYLHSR	93.47	1536.74	13	0.8	769.373	19.48	113830														108910								131010													70096
GLLYLGMGVSGGEEGAR	93.46	1664.82	17	0.5	833.413	20.43					110460							23317													0												13127
VSEDDKLIEYDALLLDR	93.45	2006.02	17	-2.8	1004.01	21.11																	13447		3907.5													35216
STVHDVVLVGGSTR	93.43	1425.76	14	-3.8	713.883	14.54					0		24524					12951								23601				13887									2078
GGSSSGGGYGSGGGGSSSVK	93.18	1587.68	20	0.8	794.842	10.75			6057.2							2021.2			36900
VHPFHVLR	93.16	1003.57	8	0.6	502.791	13		27372							77628		53596																							20356
SGMINVSPIGR	93.13	1129.59	11	1.2	565.802	17.1								73029					46690								20661													87721									49983
GSLGGGFSSGGFSGGSFSR	93.09	1706.76	19	0.4	854.386	17.8	7870.1	33075	47084	18547		32484	50125					46566	253830					52779			0		8522.8			29628								86100				35332			86439		15162
IEDLSSQLQSQAAEQFK	92.96	1920.94	17	2.4	961.476	18.36		34448	24601	46201				26007	36503	51288	54737			18083				39931			87446					57640			5559.1					31156
IEDLSSQIQSQAAEQFK	92.96	1920.94	17	2.4	961.476	18.36		34448	24601	46201				26007	36503	51288	54737			18083				39931			87446					57640			5559.1					31156
VLNQLLTEMDGMNAK	92.81	1675.83	15	0.4	838.921	20.83																	27307					31125										71856
NHEEEMKDLR	92.72	1299.59	10	1.7	434.202	11.13			12080								7783		344760								12977													14962
GILAADESTGTIGKR	92.68	1487.79	15	-0.2	744.901	14.21						485240										473540					37715							147570
IHYETTGPEIWK	92.49	1472.73	12	-0.7	737.368	16.24						98549										102270												86195											37368
GETLEEYWWC(+57.02)TER	92.45	1757.74	13	0.3	879.872	20.6	118270																						164070				20771									52667
GGPGLYSGIGKK	92.44	1132.62	12	0.8	567.317	13.36				54505				6764.7		41613								61822			60160																						10876
SNLVGMGIIPLC(+57.02)FK	92.31	1547.82	14	-1.7	774.916	23.88																																54415
NLNTVDMVALSGAHTIGK	92.1	1839.95	18	1.4	920.979	18.54				113050						0								128280			0					120690
DDLFNINAGIVK	92.08	1317.69	12	-1.2	659.853	21.09						82481										60028												86583											90315
SGVAAAVSSDPR	92.08	1115.56	12	0.3	558.783	12.39			0	617880						447470								563120			562440
NSSYFVEWIPNNVK	92.03	1695.83	14	-0.8	848.919	21.48	19971				41079										22613		0						43591		70037											28880
TDQWTSNLDLLTGLR	92.01	1731.88	15	2	866.949	21.83																																						133690
NC(+57.02)APIMLR	91.83	973.484	8	0.4	487.747	16.59		36443		0				387080		0			150900					43319			104790													210380								15473	190690
TAIAIDTILNQK	91.79	1299.74	12	0.8	650.875	19.95	0														62088								0													25771
ALLEVVESGGK	91.72	1100.61	11	0.6	551.309	17.7				185250						159640								186430			213290					296100																18925
NAVVTVPAYFNDSQR	91.72	1679.83	15	-0.4	840.917	18.51		22514		59757				29920	45504	36201	0		28102					66695		56419	90775					82025								57035	10464			40620
INVYYNEASGGR	91.7	1341.63	12	1	671.82	14.56				36779	77490	37217	63013			37653		249680			3851.1	29536		29922					7905.1			27830		12856					10975
GGGGGGYGSGGSSYGSGGGSYGSGGGGGGGR	91.66	2382.94	31	2	1192.48	11.89		18752			6158.3	19558	14071	11301	14990	10387		16830	28461	13935				23632																29274									0
A(+42.01)VTFSDLHTADGLK	91.53	1515.76	14	-0.2	758.882	19.39				268640						350700								243550			629760
TILSFAVPDQK	91.45	1217.67	11	0.1	609.84	19.84				100450						69621											162520					146450								62421								20658	38880
LVGVSEETTTGVK	91.36	1318.7	13	2.6	660.356	14.18	57177				48645	54340	19224			0		97235			48107	32777							99614					16890
AGMTHIVR	91.23	883.47	8	0.5	442.74	11.68					140300		303170			0		73843
NLQYYEISAK	90.89	1227.61	10	0.9	614.812	16.19			60156	217070				333500	78794	228110			127370					212000			414420					295130			47618					311520								59524	394160
VVPGYGHGVLR	90.7	1152.64	11	0.4	577.328	14.11
VVSEPIEMTQEFR	90.67	1563.76	13	0.1	782.884	18.6		56592	0								64171			26974
VNQIGSVTESIEAVK	90.64	1572.84	15	-0.7	787.422	17.87	103070						61857								135110								113700										24270			74039					90779
EHVIKPVIPAK	90.6	1229.75	11	2.2	615.883	13.18							8451.3																											17746
GILAADESTGTIGK	90.55	1331.69	14	0.2	666.851	15.65						351190										235080												197060											63102
M(+15.99)IPTKPMVVETFATYPPLGR	90.27	2263.17	20	0.5	755.395	20.23					187330							102170											28094														41052
SLHIDNPAAK	90.15	1064.56	10	1.3	533.286	13.02								148250					117120																					117200									53988
SDGIAGLYR	90.09	950.482	9	0.6	476.246	16.16				487100						418400								317920			452830					433820
SVQMEGLTWGASK	90.06	1392.67	13	-0.5	697.338	18.19				170580						191130								127990			473130					206110
VETGVIKPGM(+15.99)VVTFGPTGLTTEVK	89.92	2475.33	24	-1.2	826.116	19.79					215510							101850			26636										405130											13051	80394
NM(+15.99)ITGTSQADC(+57.02)AVLIIDSTTGGFEAGISK	89.82	2972.41	29	-7	1487.2	22.78						2276.7				959.09
LSGDELLSDSFPYR	89.8	1597.76	14	-1	799.884	20.32		33731	27502						27036		118920		7389.5	24992
TLHIVGPDK	89.69	978.55	9	0	490.28	13.47		58138	46770						45234		48301			24359
IINEPTAAAIAYGLDK	89.61	1658.89	16	-1	830.45	19.95			2956.3	6291	6041.5		10600				6927.4							6936.8		46942				32037	10915	9788.9				4926.5			4180.6		24074			52572
KGEN(+.98)DLPGLTDTEKPR	89.57	1769.88	16	5.7	590.967	13.84				0				0		0								0			0													0
YYTVLFGVSR	89.56	1203.63	10	0	602.822	20.51							21767																										11582								28386
YTGTSDLQLER	89.52	1281.62	11	0.4	641.814	14.86						43827	28558					49218				0												25984					15122								8373.5
IQDGVFDVSNESYGIK	89.49	1769.85	16	-1	885.926	18.68		30049	18513								27482			15603
STTTGHLIYK	89.45	1119.59	10	0.7	560.802	12.42		25935		246840	945640	60742	100470	68903	22529	110070		2253000	52911	13631		68450		0			164110				6051									117530									51532
IGYDNAAAVAK	89.44	1091.56	11	0.8	546.785	13.67					78939							174280
DEM(+15.99)IDIIGVTK	89.43	1248.63	11	-3.8	625.318	18.85					35794		59538																								12356
EDKPQPPPEGR	89.3	1248.61	11	0.3	625.309	10.81		206870	233260	98187				1795600	81337	0	145770		966700	39091				91506			485820													1341500									478140
ALLDEMAVVATEEYR	89.13	1708.83	15	-5.4	855.42	22.34																	43817					34841
FYFNPGDTGFK	89.05	1291.59	11	0.4	646.798	19.39																34318												43388											18980
LGGAFAPKPSSGPHK	88.94	1449.77	15	1.2	484.263	12.06				575250						401110								322320			934250
QVHPDIGISSK	88.7	1179.62	11	0.6	590.817	13.13		40169	30320						82963		61049		11950	25204
KVLQFAGIDDVFTSSR	88.69	1781.93	16	1.3	594.985	20.33				31122						6085.3								30298			22181					94269
IFN(+.98)GSGKPIDNGPPILPEAYLDISGSSINPSER	88.59	3454.73	33	2.3	1152.58	22.33
NLNTVDM(+15.99)VALSGAHTIGK	88.49	1855.95	18	1.3	928.977	16.85				196700						79025			10315					130360			151100					170750
HWQNYVK	88.38	973.477	7	0.3	487.743	12.64				384310						235610								229000			480360
EAGALLSYDPNLR	88.35	1417.72	13	-0.1	709.864	18.53		5361				118210								3608		242450												138820											77515
GVNTFSPEGR	88.3	1062.51	10	0.3	532.26	13.57		0						183230					129040																					115560									51825
DTTDLFVER	88.29	1094.52	9	0.1	548.267	17.43		64904	67398						53471		86048
KLAPTIGISVDHR	88.26	1405.8	13	0.7	469.606	14.78				95383														39083			432860					290030
ALEAHLAGK	88.21	908.508	9	-0.2	455.259	12.06				472950						555630								389060			740710
EGLLQLPTDK	88.19	1112.61	10	-0.3	557.309	18.7			72770	0				454700	54404	73718			339370	51809				73531			231870								148460					502200								32106	522940
ALTNAVGNLAITGAYADALKK	88.17	2074.14	21	-1.8	692.387	19.84																								0														45067		9304.2
KLNLPILPTTTIGSFPQTVELR	88.15	2437.39	22	0.1	813.472	22.78																								47870														95070
ANSASNVITTITADDLAAPGLK	88.15	2142.12	22	0.2	1072.06	21.4				10021						8113.5								19108								16031
GENDLPGLTDTEKPR	88.13	1640.8	15	1	547.941	14.89																										57323
SLDLDSIIAEVK	88.13	1301.71	12	-2.6	651.86	23.21																									24576	1705.4	1938.2								2946.8			449540		14811
GFPISVYNR	88.01	1051.55	9	0.7	526.778	18.01					368780							569870											10482		26451					1777.3			54265				113000
GRDHTVSATHGDM(+15.99)DQNTR	87.96	2012.87	18	1.3	504.223	10.37					167110
C(+57.02)GINYQPPGVVPGGDLAK	87.96	1840.91	18	1.6	921.461	18				0			9997					54055																													24186
YFPTQALNFAFK	87.96	1445.73	12	0.2	723.871	22.45																					72785					75345
VLVIGGGDGGVLR	87.95	1210.7	13	-1.2	606.358	18.64						200730										129880												221540											68398
SGGGFSSGSAGIINYQR	87.84	1656.79	17	-0.3	829.396	16.35													9071.1																					39055
ERLPANLVQAQR	87.74	1393.78	12	2.5	465.6	14.51					50008							91630																					2733.7
EVDEQMLNVQNK	87.32	1445.68	12	1	723.845	14.74					64199		102590					185830									1927.5		5132								0		0
EVDEQMINVQNK	87.32	1445.68	12	1	723.845	14.74					64199		102590					185830									1927.5		5132								0		0
FSSSSGYGGGSSR	87.23	1234.52	13	2	618.266	11.37		20751	46495	24494		37219	13633	15829	18990	21578	20588	69557	20872	30888		6024.9		43693			11435													34011									24950
TLSDQFEAKR	87.14	1193.6	10	1	597.807	12.99		267490	173510					128740	170320		139970		31498	72770																				77102									34919
VIYASQITAKPR	86.9	1345.77	12	-4.9	673.89	14.3						9788				4388.1						13331	15315					10139
KGVAINFVTR	86.61	1103.65	10	1	552.828	15.8					215370		52864					238980													5933.8						11858		86147				48988
LVIVGDGGTGK	86.57	1014.57	11	0.4	508.29	14.89		61559	65222	479660				651640	77323	477360	58757		285640	47693				437220			775940					658710								634200									637110
AVPLALGLLC(+57.02)ISNPK	86.52	1564.9	15	-1.1	783.457	23.88																	3944.6															23467
FHQYQVVGR	86.47	1132.58	9	0.6	567.294	12.66			125900						601200		144710			0
ETVVEVPNVSWEDIGGLENVKR	86.17	2468.25	22	-4.1	823.755	20.97																	26951
QDLPNAMNAAEITDK	86.15	1629.77	15	0.8	815.888	16.86									43790
NEDKLEFSK	85.99	1108.54	9	0.5	555.275	12.8				469910						358150								298820			599470
TAQNVEEAFIK	85.47	1248.63	11	0.2	625.322	16.86		74974	169030								0			42642
LQEQPAFDKK	85.46	1202.63	10	1	401.882	11.95		449060	140520						262320		122340			67334
GQALADEYGIK	85.35	1163.58	11	2.5	582.797	15.42		97226	85905						96023		92782			60326
DVNAAVATIK	85.25	1000.56	10	0.1	501.283	15.18				1258300	219820	78803	97286					632100																124290			9287.9		43603								92297
VTPNNVDIAK	85.22	1069.58	10	1.5	535.794	13.17								0					0																														14612
NIEQHASDNVNK	85.19	1367.64	12	-0.1	684.825	10.69		115320	35185						105470		100200		0
SINPDEAVAYGAAVQAAILSGEGNEK	85.18	2573.26	26	-0.9	1287.64	23.48															3744					21007				18980											16028			172460
YLQEQNPNIK	85.13	1245.64	10	1.5	623.823	12.88						113680										56075
TIFHLNPSGR	84.93	1140.6	10	0.3	571.309	15.75					51101		72303									27309		47568			51853					31892				4508.4	11783		43089	21494							85687	6909.7
IQDKEGIPPDQQR	84.89	1522.77	13	1.9	762.391	11.46		151720	59171	297930			18016			135030	65585		15383	45411				214900			346260																						23545
GLLYLGM(+15.99)GVSGGEEGAR	84.89	1680.81	17	0.3	841.411	18.69												131130																					22201				41493
YLTASAMFR	84.78	1058.52	9	1.8	530.266	18.26					43681	0	17371					102850			15553				0				41128	6707.7				14787				900.04	15929			12220	40725
AEYDESGPSIVHR	84.73	1458.67	13	3.3	730.343	13.21						0	16063									0												0
LDDEIKSWLAFAAQK	84.67	1733.9	15	-0.6	578.973	22.43																																						11817
SSLDAFQQILK	84.64	1248.67	11	-1.2	625.342	21.04				40581						45336											102410					143830
TQNVLGEK	84.62	887.471	8	-1.1	444.74	12.16		0	0	61693				795830					391900					120610			132080													444650									666700
TVLIMELINNVAK	84.61	1456.83	13	-0.9	729.423	25.61																							20183													48010
TNAENEFVTIK	84.53	1264.63	11	-1.6	633.321	16.39		57877	114860					80136				93395		0																				0							68095		114030
LQIWDTAGQER	84.48	1315.65	11	0.1	658.831	17.37		130060	59854						102130		167470			103710
LQLWDTAGQER	84.48	1315.65	11	0.1	658.831	17.37		130060	59854						102130		167470			103710
IAEGYEMASR	84.4	1125.51	10	2	563.762	13.46				0						48371								41795			72224
VLAC(+57.02)FSNNLLR	84.39	1305.69	11	-1.4	653.85	19.47							23745																								7271.7		16800								78866
YSEGMPGAR	84.34	966.423	9	0.5	484.216	12.37					195700							445540			4698.6								5830.7
DAGVIAGLNVAR	84.09	1154.64	12	-1.2	578.327	18.25							70121			11988								6562.2						19123		20111				4581.2			30043		10444			10317			114050
YVGTSDLQLER	83.93	1279.64	11	1.3	640.825	15.87					50130		27776			50853		131610																95525		4031.4	5041.5		0								0
AMIGQVAGGGR	83.85	1015.52	11	0.7	508.767	13.67		0		625150					0	515910	0			0				339250			693020					4994.8
AFDLGGHQIAR	83.76	1183.61	11	1.1	592.81	15.33		48456									44474			46519
ETVVEVPNVSWEDIGGLENVK	83.75	2312.15	21	-5.9	1157.08	22.28																																17058
AEAESLYQSK	83.74	1124.53	10	1.5	563.273	12.65				22256		19452			8977.8		37240	58005	55139	30988				28328
VLQFAGIDDVFTSSR	83.72	1653.84	15	-0.9	827.92	22.14				43561						0								0			121780					77697
TGSIVDVPAGK	83.72	1042.57	11	-0.9	522.288	14.63	20477	48138	29893											34830	14285								24651
IGGIGTVPVGR	83.69	1024.6	11	-1.8	513.308	16.33			60833	219540	1330700	125730	420340			135720		3822100				88124		0			186690				39827	164630		82878	13378	75961	81249		217750	97120		8994	784870		39689		301580	30315	74438
TLIHTDVTK	83.63	1026.57	9	1	514.291	12.65												165790
QFGIGGALPPKK	83.63	1211.7	12	1.3	606.857	15.47				740910						676810								498700			990690					1204100																57833
AVFVDLEPTVIDEVR	83.6	1700.9	15	0.4	851.454	21.98																	19958						34634		0		15473					66456				20555		19383		9433.5
EGLLVGISSGAAAAAAIK	83.56	1597.9	18	-0.9	799.955	20.76						23799										24819												10572
EGLLVGISSGAAAAAALK	83.56	1597.9	18	-0.9	799.955	20.76						23799										24819												10572
AVQEEDELSPEK	83.42	1372.64	12	0.9	687.326	12.98				61087		129650										75666												11337
IPSAVGYQPTLASDLGALQER	83.3	2185.14	21	-1.1	1093.57	20.35															82526						2874.2		89073													57825
HSLPDGLMR	83.08	1024.51	9	1.4	513.262	14.64	66121														58032								91913
GPGLFTDIGKK	83.05	1131.63	11	2.4	566.82	16.39				71907						49514								31752			54734					52189																13804
VNTISAGPLGSR	82.99	1170.64	12	1.2	586.323	15.25						306670										179240												213580
ETPAIDVC(+57.02)K	82.89	1031.5	9	-0.4	516.755	14.06				24738	378240		240830					646150													2081.8			5449.6						0
GYEGVVTR	82.85	879.445	8	-0.9	440.727	12.68					168960		362740					106120									0
YTTVQFTGEVLK	82.78	1384.72	12	0.6	693.367	18.24															12150								22642
TNVIPIIEDAR	82.77	1239.68	11	0.2	620.846	19.37			6427.5	3995.9		92149		11093			10623		17036			47766					12759					0		76031	13977				3046.2	0					23596			0	20577
TIEAEAAHGTVTR	82.77	1354.68	13	2.6	678.348	11.84		12170	11775			28491	84011	9101.2	10669
QISELGIYPAVDPLDSTSR	82.76	2060.04	19	1.3	1031.03	21.22	79756														147330								106160				22594									66803
SC(+57.02)NALLLK	82.74	917.5	8	-0.1	459.756	15.96	40389				19311																		62574													14661
SYSELPQAAR	82.64	1120.55	10	0.1	561.28	13.85					125180							191590
AGETFLIPR	82.57	1002.55	9	0.7	502.28	18.39		64828	120490					233780	58985		59374		215990																69991					198040									144300
DIIMVDHMR	82.55	1128.54	9	1.4	565.279	16.64	54899														46452								72757													22826
EDAANNFAR	82.47	1006.45	9	2.2	504.229	12.18					86605	13852	39682					289840				6239.6		9891.2					3420.7
DSAAVFAWK	82.4	993.492	9	0.1	497.751	18.97	54847																						126800
AVVQVFEGTSGIDNK	82.36	1562.79	15	-0.3	782.401	17.53	30781		22838											12880	22344								40714													10673
AHGGFSVFAGVGER	82.35	1389.68	14	0.2	464.232	17.47	21895														19870								43021													9666.4
SWLAFAAQK	82.34	1020.54	9	-0.5	511.277	19.73																								230630											103300			253580		144660
ATAGDTHLGGEDFDNR	82.27	1674.72	16	2.8	559.247	13.12			7506.2	59235	20180			80311	15834	35108	4798.8	30356	53774	16416		7092.4		54523		16759	41588			7411.4										61369
GVLFYGPPGC(+57.02)GK	82.19	1250.61	12	-1.8	626.312	18.14																	16004		19622			13545										2278.1
M(+15.99)MLTFSVFPSPK	82.13	1399.69	12	-3.9	700.851	22.09					13459										14010												9299									22420	5366.8	0
NALENYAYNMR	82.13	1357.61	11	-5.1	679.808	16.84																				10421				7866											1933.3
FEELNMDLFR	82.01	1312.61	10	1.2	657.314	21.89																																						26012
MTNFYTNFQVDEIGR	81.88	1833.84	15	1.3	917.926	20.54															10435								15282													9341.7
TLSDQFEAK	81.8	1037.5	9	0	519.756	14.09		493340	544270					328690	297570		498740		186250	331990							68318													160290									248740
GTKPWVSLPK	81.68	1111.64	10	0.1	556.824	16.05				808060						643220			17040					599240			1127000					975300																134820
NVPTWHR	81.61	908.462	7	-0.6	455.236	12.75				0				329460		118380			108110	22177				106860			346800													141340									71154
VLQLETAAGAAIR	81.6	1311.75	13	0.7	656.881	17.93	29992											59089			41123								40674													17204	53438
IIGHGINC(+57.02)FVNR	81.56	1398.72	12	1.3	467.245	15.51				28782																	81729					48891
VDPEIQNVK	81.54	1040.55	9	0.6	521.28	13.23			36658			46196					50670		458100
TTIFSPEGR	81.53	1006.51	9	0.9	504.26	15.62								244310					194890																					223860									227080
GGSGGGGSISGGGYGSGGGSGGR	81.48	1740.74	23	1.6	871.375	11.44		17644	30778	9940.5			21119				12351	21253	105670																					16133
NAPSIIFIDEIDSIAPK	81.47	1841.98	17	-0.4	921.996	24.81																			14230													73793						11868
AQYEEIAQR	81.38	1106.54	9	0.7	554.273	12.81			86798			34955						54243	394810																					60736
DAVTYTEHAR	81.35	1161.54	10	1.6	581.776	11.56		46871	33249						63302	10439	50791			33618		12267		0																									10885
LVVANVGDSR	81.3	1028.56	10	1.8	515.287	14.15						122750										74269												31704
IVVANVGDSR	81.3	1028.56	10	1.8	515.287	14.15						122750										74269												31704
ALATGIFER	81.28	976.534	9	3.7	489.274	17.21				520090				63830										352170			641960					451080								115650								20630
TIAM(+15.99)DGTEGLVR	81.26	1277.63	12	0.3	639.819	14.78															13805								41242
LTNSLMMHGR	81.19	1158.56	10	1.6	580.288	13.53									57484
TVSGVAGPLVILDK	81.19	1367.8	14	-0.7	684.905	21.17	79566																						159580				24561									79091
QQQILLATQVVK	81.08	1367.81	12	-0.3	684.911	18.23				72229						60648								51742			89434					68230																12443
TVLIM(+15.99)ELINNVAK	81.06	1472.83	13	-0.1	737.418	23.22																											18925
EKTLSDQFEAK	81.05	1294.64	11	0.9	648.325	13.1		214520	165500					210960	191000		157860			49873
VVHGIDVFDPK	81.04	1224.65	11	-3.6	613.33	16.95																								50248											5841.6			21004		37353
LSAEPDFLER	81.03	1175.58	10	1.4	588.796	17.95				263570														199240			194300																					25380
NMQDMVEDYR	81.01	1299.52	10	0.8	650.766	16.26												25098	69237																					19455
ATEIEVGVVR	81.01	1071.59	10	-0.4	536.803	16.02								134220					137570																12407					116140									100090
GIGDC(+57.02)FGR	80.95	880.386	8	0	441.198	14.59				225030						251660								209590			232900					273890
SGM(+15.99)INVSPIGR	80.93	1145.59	11	0.8	573.799	15.21								92043					56207																					83352									91701
ANSEATLGTYK	80.9	1153.56	11	2.2	577.787	12.97						100790										74678												18473
GC(+57.02)ALQC(+57.02)AILSPTFK	80.87	1564.77	14	-4.2	783.391	19.75																	25187					14344										4091.5
VSEQFTAMFR	80.87	1214.58	10	0.5	608.295	19.34							20047					44989			14414								20801		0								9878.8			16577	25727
FMNKPVR	80.86	890.48	7	0.4	446.245	11.34					62118		23525					46565
RVFIMDNC(+57.02)EELIPEYLSFVK	80.85	2501.23	20	-0.3	834.751	23.66																																						17772
DEMIDIIGVTK	80.84	1232.63	11	-0.3	617.323	20.69					12945		21010																										10258								27137
VDEIITC(+57.02)APR	80.82	1172.59	10	2	587.299	15.35				52704						51146											109350
YELGRQPANTK	80.76	1275.66	11	2.2	638.834	11.63										0
GYSFTTSAER	80.65	1117.5	10	2	559.758	14.2			26243	53051		72571		34698					26960			57401		40796			58270													28883									22563
VVLIGDSGVGK	80.58	1042.6	11	0.2	522.306	16.18		263230	260440					56910	193740		240440		70497	176520				31091			50457					20379								108180								6242.7	52144
LKYENEVALR	80.53	1233.67	10	0.4	617.84	14.07											40774		329630																					49143
SGDELTSLKDYVTR	80.52	1582.78	14	-4.2	792.396	17.72																				26896				35216														63327		19345
LAEQAERYEEM(+15.99)VEFM(+15.99)EK	80.47	2162.95	17	1.1	721.988	15.88				123010						106480								197780			332800					160360
DAYVGDEAQSK	80.43	1181.52	11	1.8	591.766	11.66		22263	33007	31832		94392	30527	42001	42175		19719		35088	26805		60719																		45204									34031
ELLTLDEKNPR	80.41	1326.71	11	0.6	664.362	15.07		30872							159840		51683			22647
QTVAVGVIK	80.34	913.56	9	-0.7	457.784	15.08		27268	33895		649900		191900	30238		14377	18682	2364700		14565				20922					8901.4		16304						19243		92818								48266
TGQVTVFWGR	80.25	1149.59	10	0.3	575.801	18.81				41946						14536								36278			67445					24334								22900								5446.9
MKGDYYR	80.19	931.422	7	0.9	466.716	11.06				66978						50121								47186																12123
SAPEELVQQVLSAGWR	80.16	1768.91	16	0.5	885.46	24.56															27036																					21679
ADGYILEGK	80.16	964.486	9	0.5	483.251	15.09				174120						292320								158280			350190					344370
HNNVIPN(+.98)GHFK	80.14	1276.63	11	1.4	426.549	12.89				15784						7451											28364
VNMEYGLDPTIGK	80.11	1435.7	13	1.6	718.856	17.96					0							78560
IIAVC(+57.02)ADDPEYR	80.08	1420.67	12	-1.7	711.335	15.9														0
GGNDHEIFESDR	80.05	1374.58	12	-0.9	459.2	12.99								65663																										30468									26342
YFEEISQDTGK	80.02	1315.59	11	3	658.803	14.93												31540
TPTEVNAFLSNPTTYISAAR	79.89	2152.08	20	-4.3	1077.04	21.41																	20602															0
TALAFVTLR	79.79	990.586	9	-0.3	496.3	20.3						48206										67082												115650											55324
VLITTDLLAR	79.75	1113.68	10	0.1	557.842	20.18					255670		70810					243180													277360					17363	16862	5482.6	66740		0		103450				80133
EAEEFAEEDKK	79.72	1323.58	11	1.4	662.797	11.5				25795				15450												3308.8	25445													16363									34752
SHIPDGPGYQEK	79.7	1326.62	12	2	664.316	11.9						66607										58014
YEEM(+15.99)VEFMEK	79.66	1349.55	10	0.6	675.78	16.37				144120						190360								157330			142700					118770
TAAYGHFGR	79.54	978.467	9	1.1	490.239	12.17							166670					25446									22518
GYPGYM(+15.99)YTDLATIYER	79.49	1927.87	16	0.8	964.937	20.05																							20116
LAVNLIPFPR	79.24	1138.69	10	1.7	570.349	22.33	47081				49216										40059	16561				6730.7			130830		75430		33863						13208			65946	34910
MVYSFHDDSR	79.04	1255.53	10	0.9	628.769	13.88				30898														20138			62321
TVVVSTAHGLK	79	1110.64	11	1.9	556.325	12.64					34134							124660
SNYNFEKPFLYLAR	78.99	1760.89	14	-1.5	587.969	22.35																					38953
VLMESIHK	78.97	955.516	8	-0.4	478.763	13.06		535610	401350					273860	332850		434200		164440	202620																				159860									65004
FTVLNPK	78.96	817.47	7	-0.3	409.742	15.69					38823		72029					30111																			14929		32551
TVLIM(+15.99)ELIN(+.98)NVAK	78.94	1473.81	13	0.7	737.911	20.65	0
RNHYVEGGDAGNR	78.91	1443.66	13	1	482.225	10.44								11293					7714.3																														2102.2
QISNLQQSISDAEQR	78.9	1715.84	15	0.2	858.925	16.29			18124								19922	17180
TC(+57.02)VADESAENC(+57.02)DK	78.89	1497.57	13	1.6	749.791	11.02																																											13918
VTMQNLNDR	78.83	1089.52	9	-0.1	545.766	13.11		14200	38205			70539	35957		14768		45506		580050	27612							53159							15023						119500
DAYVGDEAQSKR	78.81	1337.62	12	1.2	669.815	11.14		0	0			70161	0	20966				0		14480		45967		16492																60245
AAEVTTQVNSWVEK	78.71	1560.78	14	0.6	781.393	16.75																		111060			148290
NQVAMNPINTVFDAK	78.71	1660.82	15	-0.8	831.419	20.4																					30338			24536										14449				57003		6630.3	0		8218.2
IFNTNNLWVNLK	78.65	1474.79	12	-1.6	738.4	21.56	49816														90225								88195													28799
KMEVPYC(+57.02)IVK	78.61	1265.65	10	0.7	633.83	16.43				135360						114400								0			237510					184870
LPHIPRPK	78.6	956.592	8	0.5	479.302	12.87								63467					12802																					205130									14751
A(+42.01)SHIVGYPR	78.59	1040.54	9	-0.1	521.277	15.5		66083	74638			83476	132370		92351		77342			41391		79990				183670		8381.3		194940				89605		9349.2	5314.6		16835	0	6215					17264	51862		0
TPNSYMLQ(+.98)QFDNPANPK	78.3	1964.89	17	1.7	983.451	18.68																32248
YEEM(+15.99)VEFM(+15.99)EK	78.24	1365.55	10	0.6	683.778	14.51				108760						149220								146510			131200					75185
LVGEYGLR	78.2	905.497	8	-0.5	453.754	15.35		134660	107550					17332	590940		273510			234540				0
TWFNQPAR	78.19	1018.5	8	-0.1	510.256	16.35				605710						613780								445930			766080					635630																101940
HLTGEFEK	78.18	959.471	8	0.7	480.741	11.9		80803	75682	397230				321420	65328	267290			171030	45441				359480			642840													639350									721540
FVMESGAK	78.14	867.416	8	-0.7	434.713	13.24				11345				400230					170430					23804			53507													204660									70086
SQLEAAFLKK	78.07	1133.64	10	0.8	567.827	15.76				498670						282010								331400			402590					373350																31177
DSTLIMQLLR	78.02	1188.65	10	-1.3	595.333	24.18				15451																	74485					42215												2871.6
SDLNHLR	78	853.441	7	1.1	427.726	11.49		18120	13758					10521	15893		10565		11328																														7044.3
LPIYEPGLEDVVK	77.98	1470.8	13	0.8	736.403	19.96					26502		7348.1																														3229.4				14393
TYKGGNDHEIFESDR	77.97	1766.79	15	1.8	589.935	12.42																																		17833
LVLTMPASMSMER	77.97	1464.71	13	-0.6	733.36	20.2																27503
GALDGGLDIPHSDK	77.92	1393.68	14	0.8	697.846	15.77						0																						32071
TEFGPSQPFK	77.89	1136.55	10	1.9	569.281	15.88	80192														67999								93991													24312
DGKPVLIELIDAK	77.84	1409.81	13	0.8	705.912	21.28	43934														28125																					23019
MLSC(+57.02)AGADR	77.76	979.422	9	1.4	490.717	11.73		254460	135060					15961	96814		202630		19660	72601							0
LLLIGDSGVGK	77.69	1070.63	11	1	536.322	18.98		119730	89878						118660		162000			64169
IILLGDSGVGK	77.69	1070.63	11	1	536.322	18.98		119730	89878						118660		162000			64169
ILLIGDSGVGK	77.69	1070.63	11	1	536.322	18.98		119730	89878						118660		162000			64169
EITALAPSSMK	77.6	1146.6	11	0.5	574.302	16.07				0		163140	105370			0						112060		0			0					0		138110		28904	23102								41437		199270
DSSMAGYMSSK	77.59	1162.46	11	-4.3	582.236	14.16																								4328.6
ENAPAIIFIDEVDAIATAR	77.56	2028.05	19	3.6	1015.03	27.34					6059
FFEDYKK	77.56	975.47	7	1.6	488.741	13.3			153930					97110	105190												125880													109730									54308
KLFGVTTLDVVR	77.55	1346.79	12	0.6	449.936	18.77						8151										20935																							7147.6
ALGVDTVPVLVGPVSYLLLSK	77.53	2139.26	21	-1.2	1070.63	27.49																				31489				427850														1077200		123230
YENEVALR	77.51	992.493	8	1.6	497.252	13.65							13874						90581	15817																				0
GYPGYMYTDLATIYER	77.39	1911.87	16	1.1	956.94	21.48																							31030				2746.7									12866
NKYEDEINKR	77.36	1307.65	10	1	436.888	11.16			84322	17746	41440	23373		70556		8708.5		99359	201480	57556																				92585
LLEATGISTVPGSGFGQK	77.35	1760.93	18	0.5	881.469	18.58					29722							21732
AAELTTLLESR	77.3	1202.65	11	-0.5	602.33	19.39	121060														100160								142640				8122.1									0
FLSGLKDER	77.28	1063.57	9	-0.6	532.787	13.75					403960							571010
HVDISPDVTPK	77.27	1206.62	11	-0.3	604.316	13.67						98551	37536					72296				69845
EFAPSIPEK	77.22	1016.52	9	1.2	509.264	15.63						0					35001					0												109060											36673
QFNGLVDVYR	77.2	1209.61	10	0	605.811	18.57				246030						248370								212330			265370					282790
ILMVGLDAAGK	77.1	1086.61	11	1	544.311	18.9									39368
STIGVEFATR	77.05	1079.56	10	1.7	540.786	16.7		98272	0					0	65510	0	0		0	0				0											11208					0
GEALTVQKPGTQTR	77.04	1484.79	14	0.5	743.401	12.06										15252								18045
ETPAIVC(+57.02)FGDK	77.04	1235.59	11	-8.1	618.799	17.52																	12217		0			9972.7
SLVNLGGSK	77.02	873.492	9	-1.1	437.751	15.14		69376	203450			43127	59999		50337	0	84056	135340	131400	42245				58233			0					0		31322						124070							52260		0
LHFFM(+15.99)VGFAPLTSR	76.93	1637.84	14	0.3	546.952	21.43	3257.8														4181								15350													0		0
VDFAPGGTNPPHIHPR	76.88	1710.86	16	2.2	571.293	14.14								32095																										92300
AEEIMGQAIR	76.8	1116.56	10	0.9	559.285	15.65						142840										107620												93833											26175
ELVANPQLTPR	76.8	1236.68	11	-4.7	619.346	15.99																					35640							14259
HTMALTSDGK	76.75	1059.5	10	3.5	530.757	11.57												54076
TSTGMYVANR	76.74	1098.51	10	0.2	550.261	12.74		150170	85100						80404		117980			70558
ELLKPSASVALHR	76.72	1419.82	13	2	474.279	14.34												52086
TIQFVDWC(+57.02)PTGFK	76.7	1597.76	13	-0.1	799.883	21.7	6083.7				35175
TAAENDFVTLK	76.67	1207.61	11	1.4	604.809	16.61													179540
SIATLAITTLLK	76.54	1243.78	12	-4.8	622.892	24.48
LLEHLYTK	76.49	1015.57	8	1.2	508.791	14.35
EIVDLC(+57.02)LDR	76.47	1131.56	9	1	566.785	18.31					59852							109860																									46346
GIPYLN(+.98)TYDGR	76.45	1268.6	11	0.6	635.309	18.85																										0
QGVLTPGR	76.45	826.466	8	0.5	414.238	12.87				151910				188760		242710			90835					162000			335430													206050									46556
LSIYDPQVTEDQIQR	76.43	1803.9	15	1.4	902.954	17.84					64711		26747					67255																			7420.9		15844				11177				60064
STNLDWYK	76.42	1025.48	8	1.1	513.746	16.43					252430							747540													13267					7860.5							135590
FDAQTGADR	76.41	979.436	9	2	490.724	11.46					15324							34235
VVSNFVAQALR	76.39	1202.68	11	0	602.346	19.15				0		46628										23302												37596											18470
SLDIERPTYTNLNR	76.39	1690.86	14	1.8	564.627	15.71					200280							516510																									22953
TTPSYVAFTDTER	76.32	1486.69	13	-5.2	744.35	16.94																				18554				14374											2884.6
APQAAGAIHTDFER	76.26	1482.72	14	1.2	742.366	14.03							32582
VPDSTYDMIGGLDQQIK	76.26	1878.9	17	0.5	940.459	19.96																																									13440
DSFLDEGFILDKK	76.25	1525.77	13	-0.9	763.888	21.3								0					6745.2																							3068.5							8425.1
TVDTDELTVEER	76.22	1405.66	12	-0.7	703.835	14.47				871710				155290		509600			118810					808590			1199000					424330								205180									132650
GVAINFVTR	76.17	975.55	9	1	488.78	17.79					102840							0																					32757				47308				43015
ALGDYLGVK	76.17	934.512	9	0	468.261	17.53					195550							534110													8613.1						29355		56541				112490
DNGM(+15.99)HALIIYDDLSK	76.15	1719.81	15	0.3	574.277	18.52																							8224.2
FPGQLNSDLR	76.14	1145.58	10	1.7	573.797	16.47								0				303780
ELLFSDGHPVAK	76.12	1311.68	12	-0.5	656.848	16.1							33271																							7384.9	5313.7		14877								75047
YGQDATNVGDEGGFAPNIQENKEGLELLK	76.04	3105.49	29	1.5	1036.17	19.1	17750														108210								37926
LMPVGYGIK	76	976.542	9	0.3	489.276	17.25				377220						446110								352170			641960					451080																53745
YKAETQSVDFQTK	75.94	1543.75	13	0.7	772.88	12.88				78059														57639			75121
LVGVSEETTTGVKR	75.93	1474.8	14	1.5	492.606	12.89	51533					18687				15594		19085			37535	14288		11673					63660					658.88
FAQ(+.98)YTGANAIAGR	75.92	1339.65	13	4.7	670.833	14.93			0											0
SDLDIVSNASC(+57.02)TTNC(+57.02)LAPLAK	75.9	2249.07	21	0.2	1125.54	19.03		4457.3			9498.8											8334.9												24479						4893.5
QIFNGVFLK	75.89	1064.6	9	0.8	533.306	20.14								0					244490																51031					243190									410500
LLLQVAGHK	75.85	977.602	9	2.5	489.81	15.27																	10681															1998
AETEC(+57.02)QNTEYQQLLDIK	75.8	2081.96	17	3.4	1041.98	19.17												10570	15762																											2653.8
FEILEAITK	75.77	1062.6	9	-1.6	532.304	21.12																				98856				92781											47379			141700		4432.7
ATEGPIVADKNC(+57.02)EK	75.74	1530.73	14	-1.1	766.374	11.65			36576					63755	47081		0		37513																														23504
TTPSYVAFTDSER	75.66	1472.68	13	-4.9	737.343	16.69				50142				73706		40690	29002	30453		17884				52725		15686	55397			23722					10794					85679	7519.4			1756.1		6308.4		11234	62128
GGGPTHLAILSQPPDTINGSLR	75.65	2200.16	22	-0.8	734.393	18.54																	0
IINQDPPALSDK	75.61	1309.69	12	1.8	655.85	14.33												30353
VDISDEAQK	75.59	1003.48	9	0.8	502.747	12.23					22367		175890		436250					323890
ALGLPLERPK	75.57	1092.67	10	0.2	547.34	16.59							104820																										60109								162500
ALENEMLLR	75.51	1087.57	9	0.1	544.792	17.85																				10482				35092											4869.8			21536		27163
TPVSLDMLGR	75.43	1087.57	10	-0.1	544.792	18.95	25573		9840.7												15533																					12745
AILSTINPELQK	75.39	1325.76	12	0.3	663.883	17.87	43886					26691	0								33502	18396							91581					36790								21460					22660
VVEC(+57.02)AC(+57.02)VIELPELK	75.36	1657.84	14	-0.3	829.924	20.69			6417						8578.3		19701
AVC(+57.02)MISNSTSVVEVFSR	75.34	1884.91	17	0.8	943.457	20.76					37437	7673.3																	126330														5195.5
VAIGQVLLSVR	75.32	1153.72	11	0.8	577.864	21.33		73443	46979	0				18694	97731		155780		46546	53458							24747					0								8779.9	0
VLNQLLTEM(+15.99)DGMNAK	75.31	1691.82	15	-3.6	846.915	17.64																	0
VVDLLAPYQR	75.23	1172.66	10	-2.1	587.335	19.48	206990																										13271
FVAQGAYDTR	75.11	1126.54	10	-0.2	564.275	13.29	5667.1									0								0
NGVTATDLVLTVTQMLR	75.06	1830.99	17	1.8	916.503	27.51																																0
GIQTSEDYR	74.97	1067.49	9	1	534.749	12.01					101230							118710			2390.5								2701.8
LFGFTYLR	74.97	1015.55	8	-0.5	508.782	22.05	225320														137670												61002									108810
LPDAPITPGFR	74.93	1182.64	11	0.5	592.327	18.76					54937		36380	9301.4																							10186		18276								43508
TIAMDGTEGLVR	74.91	1261.63	12	0.5	631.824	16.85	47283														29598								56600													15211
GGGPTHLAILSQPPDTIN(+.98)GSLR	74.89	2201.14	22	-3.4	734.72	18.74																	56204		21014			25590
TYISGDGITK	74.77	1053.53	10	1.9	527.773	13.88				73256						97026											103760
LQELNNAVLVSALTGDLTK	74.75	1998.1	19	-3.4	1000.05	23.76																	3846
VTYPIMADPDR	74.73	1276.61	11	0.5	639.311	17.05		79834	127590						143400		299760			59022
VPYNAPLIQFSSWMGGDR	74.73	2036.98	18	-3.4	1019.49	24.08																	7307.5															16881
AAHFEESMK	74.63	1048.46	9	-1.5	525.239	11.72
DVDGAYMTK	74.6	998.438	9	1.2	500.224	13.23			22692					5826.9				37573	99830	23773
M(+15.99)M(+15.99)MTSGEAVK	74.55	1115.47	10	1.9	558.739	11.18				350820						246640								205150			307120
QGVDADINGLR	74.48	1156.58	11	2.1	579.298	15.38																										33124		47510						0
DHAC(+57.02)VVGGYR	74.45	1132.51	10	4.1	567.261	12.24						17392
GFTLEELK	74.34	935.496	8	-0.5	468.753	18.45				297450						319730								256190			215860					553010																42190
LLIQNQ(+.98)DEM(+15.99)IK	74.29	1360.69	11	0.9	681.353	15.9																		0																								0
LLIQNQ(+.98)DEM(+15.99)LK	74.29	1360.69	11	0.9	681.353	15.9																		0																								0
LEGDDLDVFKK	74.28	1277.65	11	0.8	639.83	16.65		185560									212860			96019
GFVASN(+.98)SKDDPAK	74.27	1335.63	13	1.6	668.82	11.99												155250
AVFPSIVGRPR	74.26	1197.7	11	0.7	400.238	16.83
LYQM(+15.99)QESGTLLFPAINVN(+.98)DSVTK	74.24	2584.27	23	0.6	1293.14	22.32
GFGVIDNIK	74.23	961.523	9	0.9	481.769	18.06				178490						112300								150720			116850					134870
QMIC(+57.02)C(+57.02)C(+57.02)NK	74.08	1112.42	8	1.6	557.217	11.56												80831
LVLTMPASM(+15.99)SM(+15.99)ER	74.03	1496.7	13	0.4	749.359	17.47						0																						0											0
SGYQALPWVR	74	1175.61	10	1.9	588.81	19.59					15964							23981
NC(+57.02)APIM(+15.99)LR	73.99	989.479	8	0.6	495.745	15.15								332600										59308			86432													199340									291870
QFAAEEISAQVLR	73.88	1460.76	13	-3.7	731.386	19.49																				17720				11632											5198.5			31161		8009.6
MLVYQDK	73.86	895.447	7	0.3	448.729	13.92		163740	95554						95677		209040			76589
LVNEVTEFAK	73.85	1148.61	10	-1.1	575.311	16.72																																											57356
GKGYEGVVTR	73.84	1064.56	10	-0.6	533.285	11.66					120050		421770	20786		13916		86558									27509
HNDDEQYVWESQAGGSFTVTR	73.81	2425.06	21	-3.6	809.357	17.65																								9375.8														6784
KYEDEINKR	73.72	1193.6	9	1.6	597.807	10.81													57222
ADDKETC(+57.02)FAEEGKK	73.71	1626.72	14	1	543.248	11.16																																											15041
GIVPFC(+57.02)K	73.7	819.431	7	-1.1	410.722	17.15					54611							106860																		7378.2	10384		18855
M(+15.99)ELIDAAFPLLK	73.64	1375.74	12	1	688.879	23.39																												10670
C(+57.02)GINYQPPSVVPGGDLAK	73.62	1870.92	18	7.7	936.472	18.26												0
LSSPATLNSR	73.62	1044.56	10	0.3	523.283	13.17		62615	84913	65459	58403	81094	92277	56410	148620	47635		169030	53247	82201		64336		50789			69909							25789						54260									18985
YYTDETHR	73.55	1083.46	8	2.8	542.737	10.84				27081						28127								24836			0
RGFVASNSKDDPAK	73.54	1490.75	14	0.6	497.921	10.89					186340							458670
NVYYGVAPVAQKK	73.53	1435.78	13	0.1	718.895	14.16				33814														22543			33324
GALSDHER	73.51	883.415	8	-0.3	442.713	10.53
IGLAGLAVMGQNLALNIAEK	73.48	1995.12	20	-0.2	998.566	25.59					3522.8																				24592
LYQFEPER	73.47	1080.52	8	1.9	541.268	15.88								183590					85306																9027					102490									140780
DDLFNINAGIVR	73.36	1345.7	12	-0.5	673.856	21.25																												5988.3
LAPTIGISVDHRR	73.33	1433.81	13	0.1	478.944	14.68				31080														11685								58401
HYIEFWK	73.3	1021.5	7	0.5	511.759	17.49																	40969					25340										6403.6
SEHAFYLDWAVHSFR	73.24	1863.87	15	0.5	932.942	20.34																				5627.1																		17218		7752.5
NQAAVNPER	73.22	997.494	9	-5.5	499.753	10.91							55217													2144.3
GYEVLYMVDAIDEYAVGQLK	73.21	2275.11	20	2	1138.56	24.17
LENEIQTYR	73.21	1164.58	9	1	583.294	13.79											29912	99578	86566
LWNTLGEC(+57.02)K	73.17	1119.54	9	-0.3	560.774	16.44						431620										313680		32154										266940											59492
IALTTAEYLAYEC(+57.02)GK	73.04	1701.83	15	0.2	851.918	19.28	0																						17191
ALTNAVGNLAITGAYADALK	73.03	1946.05	20	-0.8	974.03	21.35																																						1590.8
RAC(+57.02)YGVLR	73.02	993.518	8	0.3	497.764	12.65								342550																										212820
M(+15.99)IPTKPM(+15.99)VVETFATYPPLGR	72.96	2279.17	20	-2	760.729	19.34					216910							105860																									59405
DAVLLVFANK	72.89	1088.62	10	2.2	545.318	21.52									9695.6
GIRPAINVGLSVSR	72.89	1437.84	14	0.2	480.286	16.82
IGEHTPSALAIMENANVLAR	72.87	2106.09	20	0.4	703.037	20.95																																						349.35
ISTYTIGPFQSSK	72.84	1427.73	13	-4.4	714.869	18.08																	25562					15578
YNKKPTITSR	72.82	1206.67	10	0.9	403.23	10.54									46625		18006							9529.3
IGYSM(+15.99)ITDAEEK	72.8	1371.62	12	0.5	686.816	14.79						170140										92861												43143
LITGSADQTAK	72.78	1103.58	11	1.8	552.797	11.79				143810						81640								104170			107880
SYTDTANFTLR	72.73	1287.61	11	1.6	644.811	16.77								53710					28533																9664.3					43284									58566
EVAIETASFSK	72.72	1180.6	11	2.9	591.308	16.08							60688																							18806											128610
LVTPLTLQR	72.65	1039.64	9	0.5	520.824	18.3				705790				581700		1193800			352420					650030			1150000					1344000			190130					846500								215810	511370
ASALIQHEFM(+15.99)PK	72.63	1386.7	12	1	694.354	14.8																										60681								85216
VQDDEVGDGTTSVVVLAGELLR	72.59	2271.16	22	-2.1	1136.58	26.57
LLIQN(+.98)QDEM(+15.99)IK	72.59	1360.69	11	2.6	681.351	15.96										0
LLIQN(+.98)QDEM(+15.99)LK	72.59	1360.69	11	2.6	681.351	15.96										0
VQTSADEVTR	72.56	1104.54	10	1.1	553.276	11.35		85852	55685						91910		61080			78575
EENVYMAK	72.41	982.443	8	1	492.227	12.7				231080						136660			30486					144610			240020													32256
VIVLGDSGVGK	72.38	1042.6	11	0.8	522.306	16.26		263230									240440			176520
SFGVLIPDQGIALR	72.38	1484.84	14	-0.8	743.421	21.89											17010
GKIETELSK	72.33	1003.55	9	0.8	502.783	11.7				224960						216810								163270			219430													23973									24713
YTILPETR	72.32	991.534	8	1.6	496.773	16.93						57491										26206												0											6749.7
DIEAYKPGSK	72.28	1106.56	10	0.9	554.285	12.33		53347	44423						18747		40156			28928
RVIYASQITAKPR	72.16	1501.87	13	-3	501.63	12.99																												3586.1
KYQAFAQTLQQSR	72.12	1567.81	13	-2.4	523.61	14.53																	4502.8
IGAPAMTSR	72.06	902.464	9	0.6	452.238	13.15												519250			8746.6								7370.4
HAFGDQYR	72	992.446	8	2.1	497.229	11.66						10803	19781									11302		5154.3
VVSVGDGIAR	71.98	971.54	10	0.9	486.776	14.15	0														0								0
ATDVM(+15.99)IAGK	71.96	920.464	9	-0.5	461.237	12.27
MM(+15.99)MTSGEAVK	71.96	1099.47	10	2	550.741	12.44										152670											168670
SNLVGM(+15.99)GIIPLC(+57.02)FK	71.84	1563.82	14	-6	782.91	22.23
GDYFLVGYDFPSYIDAQAR	71.83	2196.02	19	-1.4	1099.01	23.54																								4385.3														33516		3303.4
ELISNSSDALDK	71.76	1290.63	12	-5.9	646.32	14.61				14691																10242				13160																			45131
HVTFENVER	71.74	1129.55	9	1.4	565.782	12.84		61810	52044								37777			31012
SLC(+57.02)TISAEVDTK	71.71	1322.64	12	0.6	662.327	15.6										70772								66842			0					83070
SSVLMDIKPWDDETDMK	71.71	2008.91	17	1.7	1005.47	19.9				12821																	4171.6					28129
ITDGALVVVDC(+57.02)IEGVC(+57.02)VQTETVLR	71.71	2645.34	24	1.5	1323.67	24.17																				4854.9
SIFEIPGAK	71.69	960.528	9	0.2	481.271	19.35																														10318											37417
AVLMDLEPGTMDSLR	71.59	1646.8	15	-1.4	824.409	20.95	11938														15159								29014				5827					0
AVLMDLEPGTMDSIR	71.59	1646.8	15	-1.4	824.409	20.95	11938														15159								29014				5827					0
C(+57.02)C(+57.02)AAADPHEC(+57.02)YAK	71.59	1551.59	13	1.2	776.803	11.21																																											5550.4
QIYPPINVLPSLSR	71.49	1595.9	14	-0.1	798.959	22.28	52731																						72547				14789									40525
LYQMQESGTLLFPAINVNDSVTK	71.46	2567.29	23	-1.4	1284.65	22.76															52006								26738				17680
AVLMDLEPGTMDSVR	71.31	1632.79	15	0.6	817.396	19.96					38867	5208.3	16690					48770			24032								32492		70774		6709.2						8194.6			22369		0			28633
GYEVHGLIR	71.3	1042.56	9	2.5	522.284	14.72							37910																										12909
SAVPSGASTGIYEALELR	71.3	1819.93	18	0.6	910.97	20.85															15741												2059
TSTGM(+15.99)YVANR	71.29	1114.51	10	1.6	558.26	11.4		115340	119470								111930			68693
DDADFTWEVVKPLK	71.11	1661.83	14	0.3	831.919	19.96							21838
FFVGGNWK	71.09	953.476	8	0.1	477.743	18.46		222000	191440					155060	152520		229460		135400
GPTPEPLC(+57.02)QVM(+15.99)LR	71.08	1512.74	13	-0.2	757.375	17.81						132750																						202960
NC(+57.02)YDALPAHGK	71.07	1244.56	11	1.7	623.286	12.34																9695.3
VNQAGIDYYNK	71.05	1283.61	11	1.1	642.812	13.86				21224			14878				8463.1	58707									18878																						22122
SQLEAAFLK	71.03	1005.55	9	1.4	503.78	17.95				130480						98651								115570			104010					112230
RDSTTASASLANSDLPGPSSSR	70.95	2176.04	22	2.9	726.351	14.29																					0
GGPGLYSGIGK	70.85	1004.53	11	2.5	503.273	15.3																					85534					69929
MMMTSGEAVK	70.85	1083.48	10	1	542.743	13.54				165670						110140								74847			170600
AVLAVADLER	70.72	1055.6	10	0.3	528.806	18.29				64272						53689								72702			67994					131300																12882
HTGVMVGMGQK	70.69	1143.55	11	1.7	572.782	12.61			10887			0						0									27084
AM(+15.99)QLLESGLK	70.69	1104.58	10	1	553.298	15.78									98978
YGQDATNVGDEGGFAPNIQEN(+.98)KEGLELLK	70.69	3106.47	29	7.1	1036.5	19.11
KVDWLTDK	70.66	1003.53	8	1	502.772	15.09					150450		52355					284270																			9046.7		40961
QSVEADIN(+.98)GLRR	70.64	1357.69	12	1.7	679.852	13.5													94068
VGSGPFPTELLGEEGDVLR	70.56	1970.99	19	-1.1	986.504	22.59					12017										2193.4										0
QLDAEIHR	70.45	980.504	8	1	491.257	12.1						85545										75268
YEEMVEFM(+15.99)EK	70.35	1349.55	10	1.3	675.781	16.4										190360								157330			142700
YGVSGFPTLK	70.34	1067.57	10	-0.6	534.789	18.56																15688																							6760
M(+15.99)LSC(+57.02)AGADR	70.34	995.416	9	1	498.714	10.97		163860	103670						112790		109220			94814
TAETLTMDYHR	70.3	1336.61	11	0.8	669.309	14						89427										0
LTPDYDALDVANK	70.19	1433.7	13	-0.1	717.856	17.19
YLTASAM(+15.99)FR	70.17	1074.52	9	0.1	538.266	15.58					0																																				23073
TIGSFLPK	70.16	861.496	8	-1.2	431.755	18.01																																									60805
DNIQGITKPAIR	70.16	1324.75	12	0.1	663.378	14.4				12117	9582.9		15487									10326		18769										3785.8
EC(+57.02)ILSGLLSVDGLK	70.1	1502.8	14	-1.2	752.407	23.59																									34430
AAEILGHK	70.08	837.471	8	0.7	419.741	11.79					18510
QIGIDPPR	70.06	894.492	8	1.2	448.252	14.85							10367			4756		73827
GDFADEASATTESDIEETLKR	69.99	2284.03	21	-5.9	762.347	18.98																	4100.7
EVDEQM(+15.99)LNVQNK	69.99	1461.68	12	1.6	731.843	12.97							53079					159740
EVDEQM(+15.99)INVQNK	69.99	1461.68	12	1.6	731.843	12.97							53079					159740
LMDIIINSLYSNK	69.98	1522.81	13	-0.1	762.41	22.43																																						18428
TLLDIDNTR	69.87	1059.56	9	-0.8	530.785	17.11			108600			51542						99762		70829				88561					4918.6			43540		48096						30760							46894	7959
AIANEC(+57.02)QANFISIK	69.76	1577.79	14	-2.6	789.899	17.8
QIFN(+.98)GVFLK	69.71	1065.59	9	1.6	533.798	20.4								253220					164250																					246460									113710
ISGLIYEETR	69.71	1179.61	10	0.4	590.812	16.3		0	0					26703	238910				27179	19805														29632
YEDEINKR	69.69	1065.51	8	0.5	533.762	11.01			26571									13395	53840	12846																				0									0
RGYVASNSKDDPAK	69.68	1506.74	14	1	503.253	10.54					35746							53133
AVDSLVPIGR	69.54	1025.59	10	0.5	513.799	17.84	65235	16308													41709			0					66053													22193
TLADYNIQK	69.5	1064.55	9	1.8	533.282	14.48		107510		0				39327		135270	94469			86788				112290			189410
IYDVGMK	69.49	824.41	7	-0.1	413.21	14.27		367210	253790					41614	186250		306150		37553	180500																				16608
VDAVVYLVDAYDKER	69.45	1753.89	15	-0.1	877.947	21.04											3207.2
LPHVPRPK	69.42	942.576	8	1.6	472.295	11.93								9739.6																										38319
LSEPYKGIGDC(+57.02)FGR	69.41	1597.76	14	0.7	533.593	16.17										54041								61485								120360
KNLQYYEISAK	69.39	1355.71	11	1	678.859	14.13								34364																										25385
TLLEGEESR	69.38	1032.51	9	2.7	517.261	13.43			99144		0	65112			34394		59588	0	162550	66641				60077			36331	2080.6						30004						73601									17791
LGGSSAFIGK	69.28	935.508	10	0	468.761	14.95						298080																						197690
NPSLDYGFK	69.27	1039.5	9	1.9	520.757	16.49																				25682				20462											6741.7			1366.3
TPVSLDM(+15.99)LGR	69.21	1103.56	10	1.3	552.788	16.65																							18749
FAQYTGAN(+.98)AIAGR	69.16	1339.65	13	0.4	670.83	14.78		0	0								0			0																				0
VVSSMFNTVSGKK	69.14	1382.72	13	2.5	461.914	14.89							6548																																		9503.1
IAFILEQVR	69.08	1087.64	9	-0.4	544.827	21.06												31145																					13320				3225.4
AHFTAPSSVR	69.05	1071.55	10	1.4	536.779	12.26									0
YEGVILNK	69.03	934.512	8	0.6	468.262	14.85
GNTANVIR	69.02	843.456	8	0.4	422.733	11.76				305580						205350								171500			262160
GISAC(+57.02)AVC(+57.02)DGAAPIFR	68.98	1663.78	16	-0.6	832.897	18.86																10725												54626											16867
VLM(+15.99)ESIHK	68.94	971.511	8	0.8	486.761	11.46		557940	459150					269160	215360				154320	0																				210790									216590
SLVGLGGTK	68.92	830.486	9	0.1	416.248	15.08			142150		0			30644	34497				367750	42569														70505						75624							33202
ARFEELNNDLFR	68.83	1522.75	12	0.9	508.592	18																								25721											4895.5			12647
VNVYYNEASC(+57.02)GR	68.81	1430.62	12	1.6	716.321	13.84						93575																						21965
LGPVFTVPILTR	68.77	1311.79	12	0.5	656.903	23.52															10872								14577		8371.5											14449
IC(+57.02)STVVESLPTAR	68.75	1431.74	13	-0.3	716.873	16.82		10501							60665					16589
MMLTFSVFPSPK	68.75	1383.69	12	0.6	692.854	23.22																											5039.7									12097
IHFM(+15.99)LSSYAPVISAEK	68.75	1807.92	16	0.9	904.962	19.36					12971
LLIVTDGEK	68.66	986.565	9	-0.3	494.289	16.48						184320										174850					22984							212850											43460
M(+15.99)MM(+15.99)TSGEAVK	68.58	1115.47	10	1.9	558.739	11.17				350820														205150
HSLPDGLM(+15.99)R	68.56	1040.51	9	0.7	521.259	12.2
FSTVVHER	68.44	973.498	8	0.2	487.754	11.93												76314
TTGIVLDSGDGVSHTVPIYEGYALPHAILR	68.43	3150.64	30	-3.2	1051.22	20.67																								5767.8
DNGMHALIIYDDLSK	68.43	1703.82	15	-0.7	852.913	20.05																							41045				1218.3
GFIPVDER	68.39	931.476	8	1.4	466.744	16.4	7317.5																						8457.5													3550.8	15227
TDIIFFC(+57.02)SPNNPTGAAASR	68.37	2037.96	19	-0.7	1019.99	20.61							5177.4																							7332.4											20842
LLYLLNQGESFTK	68.36	1524.82	13	-0.3	763.416	20.88																	0															9940
LPSAANPEAPDMVDR	68.34	1581.75	15	2.5	791.882	15.59																43474												22597
VFIMDNC(+57.02)EELIPEYLSFVK	68.33	2345.13	19	0.2	1173.57	25.5																																						23179
M(+15.99)MMTSGEAVK	68.3	1099.47	10	1.3	550.741	12.42				193710						152670								101400			168670
IMLDWDPK	68.22	1016.5	8	0	509.255	19.42								196480
Q(+.98)SGSRGGSGGGGSISGGGYGSGGGSGGR	68.16	2256.97	28	2.3	1129.49	11.46			5565										20768
VVGSEFVQK	68.15	991.534	9	0.8	496.773	14.14					0							135800
FEEMNMDLFR	68.1	1330.57	10	-6.4	666.289	20.93																				4370
RTQDGGTEVVEAK	68.08	1388.69	13	0.9	695.349	11.03						213540										240650
TITTAYYR	68.07	987.503	8	0.2	494.756	14.02		57843	50397								46925			46057
Q(+.98)LAEMMTEVYAK	68.04	1413.65	12	-0.4	707.833	19.13																																									38365
ASGASQLVVK	68.02	958.545	10	0.8	480.278	13.42					0							0
SGPYGQIFRPDNFVFGQSGAGNNWAK	68.01	2813.33	26	-1.4	938.779	20.76															0								16473
YSEGM(+15.99)PGAR	67.99	982.418	9	1	492.215	10.81					26949							120510
TAEAVDILK	67.97	958.533	9	-4.9	480.272	16.53																				35026				28449
LAEQAERYEEMVEFM(+15.99)EK	67.96	2146.96	17	0.8	716.656	17.6				56331														58538			58685					95213
LSQEEIDR	67.85	988.482	8	1	495.247	12.07				48386				33641		30886			6082.8								17346			4665.9										0									53342
QFAAEEISSMVLIK	67.84	1564.82	14	0.5	783.416	22.25																																						0
GFIFGPPIALAIGAK	67.83	1470.86	15	0.8	736.434	25.28											13186
GFLFGPPIALAIGAK	67.83	1470.86	15	0.8	736.434	25.28											13186
LTLTYNR	67.76	879.481	7	0.3	440.746	14.85						72657										38401												58462
VLDELTLTK	67.76	1030.59	9	1.6	516.301	17.5												0	499170																												0
WELLQQVDTSTR	67.73	1474.74	12	1.3	738.376	19.51													44865					76277																6963.2
APLGQNTVLLR	67.72	1180.69	11	1.5	591.352	17.19									19573
LASYLDKVR	67.72	1063.6	9	1.7	532.807	14.32													120840
ITITNDKGR	67.66	1016.56	9	1.8	509.286	11.22				45378						30549								27963		2927.8	32910			2533.6
IPLFSAAGLPHNEIAAQIC(+57.02)R	67.65	2177.14	20	-1.3	726.717	20.46																							12299
FVM(+15.99)ESGAK	67.65	883.411	8	0.5	442.711	11.14								0					70244																					83158									44120
VVSEPIEM(+15.99)TQEFR	67.61	1579.76	13	-0.1	790.881	15.97		91319	0								64243			41796
YYEAGAR	67.61	828.377	7	2.2	415.195	11.18						59500										47206
IFGPGNQYVTAAK	67.6	1364.71	13	-0.6	683.358	16.33					28689
EQVFSTYSDNQPGVLIQVYEGER	67.57	2657.26	23	-2.8	1329.63	21.2																								6171.7														4709.2
AGM(+15.99)THIVR	67.54	899.465	8	0.9	450.738	10.61					94776		173820
NGHVEIIANDQGNR	67.53	1535.74	14	1.3	512.92	12.45							39115
VDIDGGNSR	67.53	931.436	9	1.3	466.724	11.57		0									0			0
MVIPDALK	67.51	885.499	8	-0.3	443.755	17.92		173630							214200		325760			131140
HEIIGDVR	67.46	937.498	8	0.8	469.755	12.76					95146		134720					50802
IFDNM(+15.99)QKPAFVFDGR	67.44	1799.87	15	-0.3	600.963	18.18					145530																												27214			9328.5
YQAFAQTLQQSR	67.4	1439.72	12	-3.4	720.863	15.86																	8016.3					4946.6
LQIWDTAGQESFR	67.35	1549.75	13	0.5	775.88	19.23		12367							9903.4		22865
AGFAGDDAPR	67.34	975.441	10	0.4	488.726	12.62					0		56381
DIIMVDHM(+15.99)R	67.26	1144.54	9	-0.3	573.273	14.67															15488
LDELRDEGK	67.24	1073.54	9	-0.4	537.775	11.54																																											84234
EILHIQGGQC(+57.02)GNQIGAK	67.18	1821.92	17	1.8	608.311	14.64												32703
GIALNLENENVGIVVFGSDTAIK	67.18	2372.26	23	3	1187.14	23.09
TLVEHAR	67.13	824.45	7	-2.8	413.229	10.7								0					2408.5
GHYTEGAELIDSVLDVVR	67.03	1971.99	18	-2.3	658.338	23.76															1362.1												841.69
LQEQPAFDK	67	1074.53	9	2	538.273	13.4		52112									0
SGWGKPETK	66.97	988.498	9	1.9	495.255	11.18				35227						19438											45924
IQVGVFSATM(+15.99)PPEALEITR	66.96	2074.08	19	-0.8	1038.04	21.53					16738							3063.9													49012
SLDFGERN(+.98)GYLK	66.89	1398.68	12	0.8	700.343	16.49																					177500
LSVDYGKK	66.83	908.497	8	-0.6	455.253	11.97					119230	120020	59593	8609.7	31030			355050		17675	2996.2
M(+15.99)EIIPNPK	66.82	956.5	8	2.4	479.257	14.29	10828											186320			6355.2								14341
VVLIGDSAVGK	66.81	1056.62	11	0	529.314	16.49			0					83722					76105	18890															4252.1					68973
DELTLEGIK	66.78	1016.54	9	1.2	509.275	17.73					80007							171290																					21079				29283
LHFFMVGFAPLTSR	66.75	1621.84	14	-2	541.622	22.99																											1792.3									4090.6		811.68
VTM(+15.99)QNLNDR	66.72	1105.52	9	2.5	553.765	11.11						52526						105590	218490																					100950
LC(+57.02)TVATLR	66.71	932.511	8	-0.3	467.263	14.89																																											63678
GSDIIIVGR	66.69	928.534	9	1.4	465.273	16.65					65028							105520																					7638.4				14314
LFLANPDLPK	66.69	1126.64	10	-0.3	564.326	19.35																																									24202
AGMSYFHETIWK	66.68	1468.68	12	-3.5	735.345	18.14
ATINMLR	66.65	817.448	7	-1.7	409.731	15.62			66448					586910					416040																					248700									286930
TITSSYYR	66.59	989.482	8	1.4	495.747	13.3		95121
TLTSSYYR	66.59	989.482	8	1.4	495.747	13.3		95121
GSSQVIAQYYQLIR	66.55	1624.86	14	0.7	813.433	20.83																							6308				2750.7									5651.1
ATEGPIVADK	66.51	999.524	10	0.9	500.767	12.73			63022					89742			27463		41428																					29983									7769.5
TNM(+15.99)VM(+15.99)VFGEITTK	66.5	1501.72	13	-1.8	751.864	18.05																																									0
VTMQN(+.98)LNDR	66.49	1090.51	9	4.3	546.261	13.31													0
NLFFSTDVEK	66.49	1198.59	10	-0.7	600.3	19.41																																	61477								179480
EKTLSDQFEAKR	66.42	1450.74	12	1.6	484.587	12.21		75480						52191			29076																							15311
GAAGALLVYDITR	66.39	1318.72	13	-1.4	660.366	20.8
IREEYPDR	66.39	1076.53	8	0.8	539.268	11.2					139500	0	123960					295940				66204		123230
YIAGLQQK	66.38	919.513	8	0.3	460.761	13.65				189950						175280								159230			224640
AKDLLYR	66.37	877.502	7	1.2	439.756	12.82				38083						30384								39987			48857																						7297.9
TGIIVLAEGR	66.37	1027.6	10	0.2	514.807	18.25	238940				0										180480								343130													77316
EM(+15.99)IESGVIK	66.37	1020.52	9	1.1	511.264	13.79																							17300
ALGQISER	66.34	872.472	8	1	437.241	12.88				0		131010										188130
AMQLLESGLK	66.22	1088.59	10	1	545.3	18.12									98340
QFGIGGALPPK	66.19	1083.61	11	1.1	542.809	17.54				254370						225480								180190			251700					317710																43691
GGGQVIPTAR	66.18	954.525	10	-4.2	478.268	13.11						0				39322							18954					13962						0
TMEINPENSIMDELR	66.17	1790.82	15	1.4	896.418	20.23																								7612.9														10645
TALAFVTLK	66.17	962.58	9	-0.9	482.297	20.01						168500										147930										24947		293210											81860
HSSVEQIDIC(+57.02)EIDK	66.15	1671.78	14	2	836.898	16.23																												27236											5515.1
ARFEELNMDLFR	66.14	1539.75	12	0.6	770.883	20.23																				33148																		60862
NLLSVAYK	66.08	906.518	8	-0.9	454.264	17.31				0				59635		570880			45160					456370			507470					1219500			20910					69795								95197
MEVPYC(+57.02)IVK	66.05	1137.56	9	0.6	569.786	18.34										61302								40881								66434
Q(+.98)VPVDAIFQK	66.05	1144.61	10	0	573.314	18.43																																									148680
AITSAYYR	66.03	943.476	8	1.2	472.744	13.73		78678	85681											45338
TSLAPGSGVVTK	66.02	1115.62	12	-0.4	558.816	14																			7276.1			10288
GFVQFC(+57.02)YEPIK	65.94	1386.66	11	-4.9	694.336	19.81																	32369															4968.9
GPILLEDYHLIEK	65.93	1538.83	13	-0.5	770.421	19.73															16747												6110.4
GPILLEDYHLLEK	65.93	1538.83	13	-0.5	770.421	19.73															16747												6110.4
VLNQLLTEMDGM(+15.99)NAK	65.88	1691.82	15	-9.4	846.916	19.58																	22453		18042
C(+57.02)AGNDDIITIK	65.86	1218.59	11	0.5	610.303	16.32																												43848
YGQDATNVGDEGGFAPNIQENK	65.86	2323.04	22	1	1162.52	16.13	8371.7																																								10078
LRSEIDNVKK	65.82	1200.68	10	1.1	401.233	11.04											19485	0
QFDGLVDVYR	65.81	1210.6	10	0.9	606.304	18.58				0						0								0			0					0																0
VTLFLNLANDPTIER	65.78	1714.93	15	-0.6	858.466	22.15																							6038.8
NVSTGDVNVEM(+15.99)NAAPGVDLTQLLNNM(+15.99)R	65.61	2903.38	27	0.3	1452.69	21.45
S(+42.01)SIGTGYDLSVTTFSPDGR	65.55	2000.93	19	2.3	1001.47	21.66													8140.6
DSTTASASLAN(+.98)SDLPGPSSSR	65.5	2020.92	21	1.6	1011.46	15.35																					0
AIHGGNFQGTPIGVSMDNTR	65.41	2070.99	20	-4.7	691.334	16.51																				20339				31562											5282.5			2278.2
ILTEFFGKEPR	65.4	1335.72	11	-2.7	668.865	17.48																	21445					9468.6										2650.3
DAEAWFNEK	65.38	1108.48	9	0.5	555.246	17.55						37994						47847	287250																					22717				16211			46234
LSFLYPSC(+57.02)TGR	65.28	1299.63	11	1.5	650.821	19.74		18583	11413								22065			11733
YFGAAIGK	65.28	825.438	8	0.3	413.725	15.69								167950					120130																					109310									166550
VAAAYDC(+57.02)K	65.27	896.406	8	1	449.209	11.18						27181	13341					23507				11985
LFQVEYAM(+15.99)EAVK	65.22	1442.71	12	-1.1	722.359	18.05						103330										62399												81574
VLAHTQIR	65.2	936.551	8	-0.3	469.281	11.26					290140		796740					174340																						12368									7535.2
DGGSDYLGK	65.19	910.403	9	0.2	456.207	12.71															4061.3								0
QAVVNPENTFFSVK	65.19	1578.8	14	0.5	790.41	19.83																								36125																12119
IHFMLSSYAPVISAEK	65.1	1791.92	16	-8.9	896.961	20.12					23233
DEGFGSLWR	65.09	1065.49	9	1.2	533.752	20.36																										4919.6
GELDDTAAFK	65.03	1065.5	10	1.9	533.757	15.14							65973																								6231.2										16725
FC(+57.02)NPELSEIVTK	65.01	1435.7	12	0.4	718.858	18.38																																								10669
LQGEIAHVK	64.99	993.561	9	1.8	497.786	11.85								4787.1			14374		50552	4482.4																				6842.3
NC(+57.02)DPN(+.98)GPLMLYVSK	64.97	1607.73	14	-4.6	804.87	20.04
AEGAMYLFPR	64.87	1153.56	10	0.7	577.785	19.57	0														2958.3								7038.8
AFVHWYVGEGMEEGEFSEAR	64.86	2329.01	20	1.8	777.346	19.27																													8777.2
GPELLTM(+15.99)WFGESEANVR	64.74	1950.91	17	-0.9	976.464	23.88																																28096
VEIIANDQGNR	64.73	1227.62	11	0.7	614.816	13.57														13193						6390.8														0
AGMIFYR	64.64	856.427	7	0	429.221	17.47	18202											195170													6933.1											10778	72047
ATIGADFLTK	64.6	1035.56	10	0	518.785	18.15		51368	48238						64780		59619			0
MMM(+15.99)TSGEAVK	64.59	1099.47	10	2.5	550.742	11.79				77170						72465								39250
IN(+.98)AWNSDTLPIYEPGLDDVVK	64.56	2359.16	21	-3.1	1180.58	22.67																									0							7431.1
DKDGYWK	64.5	910.418	7	1.2	456.215	12.39										48399								47925			74176
SDETVAM(+15.99)IEAYLR	64.42	1512.71	13	-5.8	757.359	22.58																	23080					14069										34205
HFSVEGQLEFK	64.4	1319.65	11	-5.9	660.829	16.87																				9558.6				13555														5824.1		4851.8
C(+57.02)C(+57.02)TESLVNR	64.37	1137.49	9	-0.1	569.753	12.7																																											8633.7
KHWQNYVK	64.29	1101.57	8	1.1	551.791	11.38				59700																	77880
SGETEDTFIADLAVGLSTGQIK	64.26	2251.12	22	-0.1	1126.57	25.51															7592.1								1938.5				2135.6
LAGESESNLR	64.24	1074.53	10	-2.5	538.271	11.97																	8368.8					4862.5
AQVGPPPALIK	64.1	1089.65	11	-2.2	545.833	17.07						6698.2																									0
LYQM(+15.99)QESGTLLFPAIN(+.98)VNDSVTK	64.04	2584.27	23	0.6	1293.14	22.18
YKDKDITVVAGVEAR	64.02	1662.89	15	1.9	555.303	14.09											27638
LEGPIAWDVLYNFEQR	63.98	1948.97	16	-1.6	975.49	25.06																								8211.7											3835.5
AIASNIDANFLK	63.93	1275.68	12	-0.1	638.848	18.84				23074																																					17245
GELLVGILGSLDSGNK	63.92	1570.86	16	-0.8	786.435	25.72
FEELNM(+15.99)DLFR	63.84	1328.61	10	1.1	665.312	19.56																																			0
TVGHTVTSPNDTVQ(+.98)QC(+57.02)K	63.82	1871.87	17	5.4	624.964	11.66													0
YPLVSDVTK	63.81	1020.55	9	-0.2	511.279	16.06									151330		181420
ASTIDLIR	63.76	887.508	8	-0.1	444.759	16.92														26034
NHYVEGGDAGNREN(+.98)FINELIR	63.74	2417.14	21	6	806.721	15.86																																		114050
VEAGVVELLK	63.61	1055.62	10	0.4	528.817	19.33			86049						0		61200		157830																					0
MFVLDEADEM(+15.99)LSR	63.55	1570.7	13	3.5	786.357	19.62					67255							45281						0															12418				18145
YQEIVNIR	63.55	1033.56	8	0.7	517.784	15.74	16896	0													14367								24361													4327.2
NEFSLESK	63.55	952.45	8	1.1	477.232	14.79		48644	50738								47901			35861
NEFSIESK	63.55	952.45	8	1.1	477.232	14.79		48644	50738								47901			35861
EYFAVPYPLPK	63.53	1322.69	11	-4.6	662.35	20.92																	11455
VQQLLQ(+.98)DFFNGK	63.53	1436.73	12	-1.3	719.373	21.75																				52150
LLIQN(+.98)QDEMIK	63.5	1344.7	11	2.6	673.357	17.73																										0
LLIQN(+.98)QDEMLK	63.5	1344.7	11	2.6	673.357	17.73																										0
EQVFSTYSDNQPGVLIQVFEGER	63.5	2641.27	23	1	1321.64	23.6																																						34600
KPEEINKEEYAAFYK	63.49	1857.91	15	-1.9	620.311	14.64																								11426
LVDGGESQR	63.4	959.467	9	0.8	480.739	10.78							71271
LHVEALQNR	63.39	1078.59	9	-6.6	540.298	13.05																	1939
LEVGSETVIDK	63.38	1188.62	11	1.3	595.318	15.32					176490
AVENSPFLEK	63.37	1132.58	10	-0.1	567.295	15.86																																			2505.9					41672
YVSEHGPYK	63.29	1078.51	9	1.4	540.26	10.97						0										46715
DLGMTVLVSQVNR	63.27	1430.76	13	1.8	716.386	20.62					30533																																4807.4
VVPLFEK	63.24	830.49	7	-2.1	416.252	17.79																	0					49455										5515.4
QEVMIGYSDSGK	63.2	1312.6	12	-3.1	657.304	15.03																	1893.1		2148.9			2875.8
AGAGSATLSM(+15.99)AYAAAR	63.19	1483.71	16	0	742.858	15.03						0										55684
LPLQ(+.98)DVYK	63.18	975.528	8	5.4	488.774	17.15																																					0
AVTSAYYR	63.17	929.461	8	2.8	465.737	12.75								17187					0
EAINLALDK	63.15	985.544	9	0.1	493.777	16.69								24705
ALTVPELTQQMWDSK	63.15	1745.87	15	-1.4	873.942	21.65																							19293				3516.5
GAWTEQFDSYGTK	63.14	1488.65	13	1.6	745.331	17.28				25520																	18094																					3318.7
ILM(+15.99)VGLDAAGK	63.11	1102.61	11	0.4	552.308	17.09
LAAN(+.98)AFLAQR	63.09	1074.58	10	-3.9	538.294	17.86												0																					0
NEAAEFR	63.07	835.382	7	0.9	418.697	12.13								56013					43425																					25324									43554
Q(+.98)VPVDAIFQKDEMIDIIGVTK	62.98	2359.23	21	-3	787.416	23.2																									0
IVDIC(+57.02)EK	62.91	875.442	7	-0.6	438.726	13.49					0	26893						83859																9863
DVDGAYM(+15.99)TK	62.89	1014.43	9	1.4	508.222	11.64
NSLENYAYNMR	62.88	1373.6	11	2.5	687.807	16.4				36281
LAADDFR	62.85	806.392	7	1.5	404.203	14.14		21033	32378					31161			52614		311250	26672		13356												14573						53018
LLILTDPR	62.82	939.575	8	0.7	470.794	19.55			0								0		373670								0								69017					177250									0
AVLM(+15.99)DLEPGTMDSVR	62.81	1648.78	15	-1.7	825.396	18.55												0
VFIM(+15.99)DNC(+57.02)EELIPEYLSFVK	62.73	2361.13	19	-0.5	1181.57	24.63																																						22743
LGIHEDSQNR	62.72	1167.56	10	0.3	584.786	11.35												0				0				4616.2				9834.4
ENNPDLAGDR	62.67	1099.49	10	3	550.751	11.67								14200	19729					10446		29065																											9788.7
AIPWIFAWTQTR	62.62	1488.79	12	-4.8	745.398	25.45
IGIN(+.98)GFGR	62.57	833.439	8	2	417.726	16.62		90892				117080							69781			86299		42502																106910
TYDLNFKEENNN(+.98)GSQK	62.56	1900.84	16	2.6	634.621	14.41	7617.9																						17136
EGVIQHSTINNLGIGR	62.55	1706.91	16	1.2	854.458	15.98											43402
LMVELSR	62.5	846.463	7	1.8	424.238	16.41				0														0			0
LATEELC(+57.02)K	62.42	962.474	8	0.5	482.242	13.01					58954		72184					63362
YKVGAPAR	62.42	860.487	8	1.4	431.249	11.13						92960				8019.4						94334		11320
YTSIKPLGDR	62.4	1148.62	10	2.2	575.315	13.47		27787
DSTLIM(+15.99)QLLR	62.37	1204.65	10	1.1	603.332	22.83																										72455
MM(+15.99)M(+15.99)TSGEAVK	62.35	1115.47	10	1.6	558.738	11.18																		205150			307120
EENVYM(+15.99)AK	62.34	998.438	8	1	500.224	11.43				198690						77681								95501			200580
VVTALTLLK	62.33	956.627	9	-3.5	479.319	21.87			12685					24070
LTLADALVYAC(+57.02)NQGVDK	62.3	1849.92	17	0.7	925.97	22																																				11224
SKFDNLYGC(+57.02)R	62.18	1258.58	10	0.9	630.294	13.78	18222														6211.6								37391
A(+42.01)GM(+15.99)APEGSQFDAK	62.14	1365.59	13	0.4	683.798	14.7					338630							627930
VGGVLAVSR	62.14	856.513	9	1	429.262	14.69						98117										63860												26746
VQALEEANNDLENK	62.13	1585.76	14	0.7	793.883	14.48			44727
EVSSYLKK	62.1	952.523	8	-0.5	477.267	11.97				181220	333480		97576			78119		994390	43964			50833		109940			105110				2284.9									75311									38527
IGIVGLPNVGK	62.02	1065.65	11	0.3	533.835	19.58																																									0
GIGPC(+57.02)YSSK	61.88	967.443	9	-0.8	484.726	12.6					0
ALEEANADLEVK	61.87	1300.65	12	0.5	651.33	14.94													45903																												11286
MSILNTAGSGK	61.83	1077.55	11	-5	539.779	15.38																								2581.4
LVLPGELAK	61.83	938.58	9	-1.1	470.295	18.22
MLFDIQK	61.82	893.468	7	0.8	447.739	18.7					56412							193580
DIIM(+15.99)VDHMR	61.81	1144.54	9	1.5	573.275	15.11	25244
KAVENSPFLEK	61.8	1260.67	11	-6.1	631.34	13.93																				11997
LSKEEIEK	61.8	974.528	8	1.2	488.27	11.01				24703
KM(+15.99)EVPYC(+57.02)IVK	61.71	1281.65	10	-0.5	641.827	14.76				211140						229640								201980			328790
VIILGDSGVGK	61.69	1056.62	11	-0.7	529.313	17.16		86602	85435								95972
VLLIGDSGVGK	61.69	1056.62	11	-0.7	529.313	17.16		86602	85435								95972
HDVVYPIR	61.69	997.534	8	-2.3	499.773	13.99																								4077
MM(+15.99)LTFSVFPSPK	61.62	1399.69	12	0.5	700.852	22.09																							31218													22420
SNESDMSQQEVYR	61.6	1571.65	13	-0.1	786.83	12.69												8004.7
ELTTEIDNNIEQISSYK	61.58	1995.96	17	1	998.99	19.57																																						30519
VQTQPGFAR	61.57	1002.52	9	0.4	502.267	12.82				24711		443660										312790		21619
QSLRPDNIK	61.56	1069.59	9	0.3	535.799	11.81												801140						37987
HIQKEDVPSER	61.54	1336.67	11	1.8	446.564	10.69
YLEMFYALK	61.48	1176.59	9	-0.2	589.302	21.94																																						41507
VNM(+15.99)EYGLDPTIGK	61.46	1451.7	13	0.4	726.853	16.31												89959
TC(+57.02)VADESHAGC(+57.02)EK	61.39	1462.58	13	1.8	732.296	10.58
AFVHWYVGEGM(+15.99)EEGEFSEAR	61.36	2345.01	20	-7.9	782.671	18.45															3573.4			1437.5		3834.1
LLGPGLNK	61.3	810.496	8	-1.5	406.253	14.89		81590	98425					1320000		46455	59523		1095400					76390			68485													930370									978910
GAVGALVVYDISR	61.28	1318.72	13	1.3	660.367	19.67											34502
QM(+15.99)SLLLR	61.28	875.49	7	0	438.75	16.07
YHPGYFGK	61.27	967.455	8	1.3	484.733	12.84									58775
VPQVSTPTLVEVSR	61.27	1510.84	14	-1.3	756.424	17.98																																											11669
SIGVKPPK	61.24	824.512	8	-4.2	413.262	11.76
TNTEFVEVLSR	61.23	1293.66	11	-5.1	647.829	17.78						43484										23777												45077
ATINM(+15.99)LR	61.18	833.443	7	-0.9	417.726	12.93								839430					643320
N(+.98)GTC(+57.02)AWLRPDGK	61.17	1374.63	12	2.3	688.323	16.25							40830																										15578
LYEVVPPILTELGK	61.17	1569.9	14	-1.8	785.957	24.29					10175		9521.4																										6722.4
YLDGLTAER	61.11	1036.52	9	1.1	519.265	15.71			57835										138490
ARYEEIVK	61.1	1006.54	8	1	504.277	12.33							202460					1528700									122450
LAEIFATIIK	61.06	1117.67	10	0.3	559.845	22.47
QVEIPFKPAR	61.04	1183.67	10	-1.9	592.842	16.15
VATVSLPR	60.94	841.502	8	-1.9	421.755	15.15	124170	3672700	3581100	2614800	2790900	3308100	2758900	3734700	3922100	2268900	3944500	5477100	3639700	4020300	110350	2206300	96444	2425200		111530	2194000	147590		67107		3318300		3430000	1522.1	28061	221710	12526	753760	2722500	3012.8	3199.6			44500		1251400		2661400
GLSIPEC(+57.02)QK	60.87	1030.51	9	1.8	516.262	14.6							61336
KDVDGAYMTK	60.85	1126.53	10	3.9	564.273	11.51													24226
RDELTLEGIK	60.8	1172.64	10	0.9	587.325	15.93					362140							545810
QSVEADINGLR	60.76	1200.61	11	2.1	601.31	15.95													30163
LNLTSILVQR	60.76	1155.7	10	-0.8	578.856	21.43				57346																						69346
VAALHLGK	60.74	807.497	8	0.3	404.754	13.54	85369						6395.1				9801.5	57575			69736						18811		118940											16569
ATDVMIAGK	60.7	904.469	9	-0.2	453.24	13.75	20154											83199			17185								30993
LVGSADFHLFK	60.69	1232.66	11	1	617.333	18.64				31893
ENGVPLVAFSLK	60.62	1272.71	12	0.2	637.361	22.15															0								0		37021
ALLDVGLIR	60.61	968.602	9	-1.7	485.305	20.79						372560										307120																							251970
VVAPPERK	60.6	894.529	8	1.1	448.27	10.84				4862		11804										6906.3
GHIVATSPAFANR	60.58	1339.7	13	1.1	670.855	13.67												10432
IC(+57.02)DGILK	60.58	817.437	7	-1.5	409.723	14.83				1007500						976070			99225					834060			1175400					1355900								104670									116450
C(+57.02)ALVYGQMNEPPGAR	60.58	1661.77	15	-2.9	831.885	16.09	2904.7
AVC(+57.02)M(+15.99)ISNSTSVVEVFSR	60.54	1900.9	17	3.4	951.457	19.42					0
QIQQMVR	60.49	901.48	7	1.4	451.746	12.77																65712
KM(+15.99)ELDAFLK	60.48	1109.58	9	1.1	555.795	16.6
ILDWENTSPK	60.46	1201.6	10	-5.3	601.803	16.4																	31327					35430
VYGLDINPR	60.41	1045.56	9	-4.5	523.783	17.39																	5489.2					4944.6
ASALIQHEFMPK	60.38	1370.7	12	2.1	686.357	16.19																																		15086
NPDPMELVR	60.33	1069.52	9	1.5	535.769	17.72																																					19339
ARFEELNM(+15.99)DLFR	60.33	1555.75	12	-1.7	519.588	18.28																																						0
NYGIWLR	60.29	920.487	7	0.9	461.249	19.01									0
SSVLM(+15.99)DIKPWDDETDMK	60.28	2024.91	17	0.3	675.976	18.85																					44956					30818
QIGVIGWGSQGPAQAQNLR	60.23	1979.03	19	1.7	990.522	19.28																							5258.2
EAAYQIINDELM(+15.99)LDGNPR	60.04	2076.98	18	1.8	1039.49	20.84
VYGLNEIQAGEMVEFASGVK	60.01	2140.05	20	-1.5	1071.03	22.46																											2057.3
LYSIASTR	60	909.492	8	0.6	455.751	14.4						112430										57751												24764
FM(+15.99)NKPVR	59.96	906.475	7	2.3	454.243	10.7												57570
AAFGGSGGRGSSSGGGYSSGSSSYGSGGR	59.89	2500.06	29	3.6	834.359	11.82		4855.2										6097
EPLTVYGDGK	59.88	1077.53	10	0.8	539.772	14.56						76462										42680
GGSGGGGGGSSGGRGSGGGSSGGSIGGR	59.87	2078.91	28	1	693.974	10.39							8008.2
IAVLGFAFK	59.78	964.574	9	1.5	483.295	22.48																									61988												10282				6467.9
KAHFTAPSSVR	59.76	1199.64	11	2.2	600.827	11.31
LSDYIGKK	59.75	922.512	8	0.7	462.262	11.9		0									0
KVYVLPK	59.74	845.537	7	0.3	423.774	13.19
GGFVSNIPGDVPR	59.72	1313.67	13	0.2	657.841	17.82				33374
GGFVSNLPGDVPR	59.72	1313.67	13	0.2	657.841	17.82				33374
LVFLGDQSVGK	59.71	1161.64	11	0.3	581.824	18.39			20989								30792			22233
SFPVLFDVDKVEK	59.7	1521.81	13	-0.3	761.907	20.49					0
EMVEWTR	59.65	949.433	7	-0.3	475.724	15.71																																	7823.2
TWFNQPARK	59.64	1146.59	9	1.9	574.302	14.1										204720											294770
LM(+15.99)PVGYGIK	59.63	992.536	9	1.5	497.274	15.63				386010						463490								301370								573800
EEVGQDNFFLFGAK	59.54	1599.76	14	0.5	800.886	22.04																																								5897.7
GNIPYFETSAK	59.52	1225.6	11	0.9	613.804	16.96			55779								71080
M(+15.99)FVLDEADEM(+15.99)LSR	59.46	1586.7	13	0.5	794.351	18.19					109170
SVLIEPTSGNTGIGLAFMAAAK	59.45	2147.13	22	0.3	1074.57	22.86																0
VVDSPC(+57.02)C(+57.02)LVTGEYGWTANMER	59.45	2443.06	21	-1.6	1222.54	20.4																																						8768.4
IISSIEQK	59.45	916.523	8	0.1	459.267	12.98				235080						356600								293710			433680
ILSSIEQK	59.45	916.523	8	0.1	459.267	12.98				235080						356600								293710			433680
ELAQQIEK	59.43	957.513	8	-1.3	479.761	12.62					369770		140670					865700									26254
ATDAVIKGPGK	59.41	1055.6	11	0.8	528.804	11.79						0										5382.6		1188.9
DVIAQAQSGTGK	59.4	1173.6	12	0.8	587.805	12.5							32638
LAYVALDYEQELETAK	59.4	1854.92	16	-0.6	928.465	20.23																		8187.1
TAAAPIER	59.33	827.45	8	-0.2	414.73	11.73				504090						390680								346100			385750													16598
KDDEVQVVR	59.32	1086.57	9	0.6	544.289	11.68									75320
ATFISHGNTAR	59.32	1173.59	11	0.1	587.799	11.49																38659																											3096.5
SKYEAAGIWYEHR	59.31	1608.77	13	3.9	537.265	14.88																																									3112.7
C(+57.02)DVDIRK	59.27	904.444	7	0.9	453.227	11.16																					0
LAEQAER	59.21	815.414	7	0.6	408.713	10.7																																		0
QVAQQEAER	59.2	1057.52	9	1.9	529.763	10.57				4966.7																	4478.8
M(+15.99)LVYQDK	59.18	911.442	7	1.3	456.727	12.5		163170							100690		180800			110040
M(+15.99)(+42.01)DEEYDVIVLGTGLK	59.13	1738.83	15	-0.2	870.424	23.56																									15988												3634.6
NNAIVC(+57.02)NIGHFDNEIDM(+15.99)N(+.98)GLETYPGVK	59.11	3050.38	27	3.6	1017.8	19.72
IGAPAM(+15.99)TSR	59.11	918.459	9	-1	460.235	11.32					95940
VLPEMILIC(+57.02)QNLR	59.1	1597.87	13	0.1	799.942	23.04
GILAADESTGSIAKR	59.08	1487.79	15	0.9	744.901	14.21				34468														30269										110070
SEGFEHYR	59.06	1023.44	8	2.5	512.727	11.88						56518
DVNLDLIKVEGK	59.06	1341.75	12	-0.2	671.879	18.34				14363														22767								21458
LSEVNPMLGFR	59.02	1261.65	11	-5.2	631.828	19.75																	9554.7
GILAADESTGSIAK	58.99	1331.69	14	-0.4	666.854	15.69																																							63102
FYSGFPVYC(+57.02)VR	58.92	1393.65	11	1.8	697.829	20.02																					38048
LGILSVTSGANPVSLK	58.85	1554.9	16	1.4	778.454	20.48
IEELAGVPVHYIGVGPGR	58.84	1862.01	18	-0.5	932.005	18.94					0
YFNVIGSDPEGR	58.83	1352.64	12	-1.1	677.324	17.78																																	8205
FWEVVC(+57.02)DEHGIDPTGR	58.83	1915.85	16	0.6	639.623	18.3																							291.62
STYIHEPPYFK	58.81	1380.67	11	-3.7	691.34	16.03
SLDFGER	58.78	822.387	7	-0.5	412.199	14.95				411200						453560								0			421490					572790
ELISNSSDALDKIR	58.76	1559.82	14	-4.4	780.912	16.14																				10234				27568
TITLEVESSDTIDNVK	58.71	1762.88	16	-0.5	882.449	17.89										25878
FLAIDAVEK	58.7	1004.55	9	0.4	503.285	18.2																				39661				42902											8687.5			28444		41737
AEDDYDYLFK	58.7	1277.55	10	0.1	639.779	19.67		31692
QSLEASLAETEGR	58.62	1389.67	13	-0.4	695.844	16.16					27258																													0							0
ILTEFFGK	58.59	953.522	8	-5	477.766	19.2																	16041
AMDFRPK	58.53	863.432	7	-0.1	432.722	12.78												303030
NQVAM(+15.99)NPINTVFDAK	58.52	1676.82	15	0.3	839.417	19.13										0										49370																		34800
HYPVLFR	58.52	930.508	7	-5.3	466.259	16.31																						18174
M(+15.99)ITIDNKPIK	58.5	1187.66	10	0.9	594.836	13.58
INSFDTAPK	58.49	991.497	9	1.8	496.755	13.33
EAAYQIINDELMLDGNPR	58.48	2060.98	18	5.2	1031.5	21.47															0
LGVTQC(+57.02)TIAHALEK	58.44	1539.81	14	-2.6	770.909	16.79																								8688.1																4735.6
QKPIWMR	58.43	957.522	7	-7.1	479.766	15.14																				10206
DITPDDKQELDEALQR	58.41	1884.91	16	-2.3	943.458	16.53
IFNTYGPR	58.39	966.492	8	0.5	484.254	15.01																63991												68873
AMIGQ(+.98)VAGGGR	58.39	1016.51	11	6.4	509.262	14.15										0
LVLTMPASM(+15.99)SMER	58.37	1480.71	13	-1.3	741.357	19.03						32554
KAC(+57.02)DLGLEVKPWIK	58.37	1655.91	14	-2.4	552.975	17.58
AHALSTVDGYSGYGAEQGEK	58.36	2038.92	20	0	680.645	13.85							17914
LEIMEPC(+57.02)C(+57.02)SVK	58.35	1364.61	11	2.4	683.316	16.9																												15567
ILVATDLVGR	58.29	1055.63	10	-0.9	528.824	18.7				0								127380
EIDLYSTNQDC(+57.02)IK	58.29	1597.73	13	2.1	799.87	16.56														3602.5
KDVDNAYMIK	58.26	1195.59	10	2.3	598.801	13.41													26635
LELELAEVEMPGLMAC(+57.02)R	58.25	1959.95	17	-0.9	980.983	23.58																											2496.9
VIVAIENPQDIIVQSARPYGQR	58.13	2465.34	22	0.9	822.788	20.33																					4773.4					4405.6
FGIVYVDYK	58.06	1102.57	9	2.6	552.292	19.25																							4875.8
FGLVYVDYK	58.06	1102.57	9	2.6	552.292	19.25																							4875.8
EAVYFLR	58.05	896.476	7	2	449.246	18.19					78333							56663																			6737.1		16499
ENVTVGVVGGSDLVK	58.03	1471.79	15	-1.7	736.898	17.39																																		0
M(+15.99)VNHFVQEFK	57.99	1293.62	10	-8.7	647.812	14.76																				21586
TMLEIVNQLDGFDAR	57.99	1720.85	15	-2.3	861.428	23.24																									9108.5
LIVAGASAYAR	57.96	1090.61	11	2.5	546.313	15.62																							5116.2
VTPN(+.98)NVDIAK	57.96	1070.56	10	9.5	536.29	13.24
EKAPAAFC(+57.02)R	57.94	1048.51	9	0.2	525.261	11.91							18549
G(+42.01)GPGLYSGIGKK	57.86	1174.63	12	0.8	588.322	15.66				29409						26177
ETYGEM(+15.99)ADC(+57.02)C(+57.02)AK	57.83	1449.52	12	0.1	725.768	11.43																																											4630.3
INAWN(+.98)SDTLPIYEPGLDDVVK	57.82	2359.16	21	-2.4	1180.58	22.72							3005.1
IGLAGLAVM(+15.99)GQNLALNIAEK	57.82	2011.11	20	-1.5	1006.56	23.09																									48749
LLIQ(+.98)NQDEM(+15.99)IK	57.77	1360.69	11	-1.5	681.352	15.97																																										0
LLIQ(+.98)NQDEM(+15.99)LK	57.77	1360.69	11	-1.5	681.352	15.97																																										0
AVLMDLEPGTM(+15.99)DSVR	57.68	1648.78	15	-0.5	825.394	18.64															26078
GATLVVSGDGR	57.65	1030.54	11	0.3	516.275	13.36				64759
VYGLNEIQAGEM(+15.99)VEFASGVK	57.65	2156.05	20	2.3	1079.03	19.99																																				5195
FPGQLNSDLRK	57.6	1273.68	11	-1	425.566	14.5												82078																9952
LELAQYR	57.56	891.481	7	-2.1	446.745	15.26															12040								24062
IM(+15.99)LDWDPK	57.55	1032.49	8	0.9	517.253	18.47								301150					190840					48177
YLSSVLFHSIK	57.55	1292.71	11	1.6	647.362	18.71																18509
LVDVLAPR	57.54	881.533	8	-0.4	441.774	17.41												144330													4460.3						3627.9						28506
EITALAPSSM(+15.99)K	57.53	1162.59	11	1.9	582.303	14.38						138310				53921								78108										179690
GSGGGSSGGSIGGRGSSSGGVK	57.52	1750.82	22	-0.2	876.413	10.59
IYVEIER	57.5	920.497	7	-0.6	461.255	16.11																																	12030
RITIKPQTDR	57.46	1226.71	10	-0.3	409.909	11.19
HIVNALENPLK	57.43	1246.7	11	-0.6	624.356	15.46
NLSQQC(+57.02)LNALAK	57.42	1358.7	12	-3.1	680.354	16.14																								5969.5
TPNSYM(+15.99)LQ(+.98)QFDNPANPK	57.42	1980.89	17	3.2	991.45	16.94						39217
DHSDVSNQLYANYAIGK	57.41	1893.89	17	1.5	632.301	16.58															0								2756.9
GAWTDQFDSYGTK	57.33	1474.64	13	0.1	738.322	17.43				28964
M(+15.99)VIPDALK	57.28	901.494	8	-0.1	451.752	16.04			66533						454510					323790
LELELAEVEM(+15.99)PGLM(+15.99)AC(+57.02)R	57.27	1991.94	17	1.2	996.973	20.37
FYEAFSK	57.22	890.417	7	-2.8	446.215	15.43																								6463.7
TPNSYILQQFENAANPK	57.22	1933.95	17	0.7	967.985	21.18																23505																							10070
QEYEQLIAK	57.16	1120.58	9	2	561.297	15.39			0																									189910
KVVISAPSK	57.16	927.575	9	1.8	464.793	11.85													42024
EYLKDPSK	57.1	978.502	8	0.7	490.256	11.28						682090										470210
SISISVAR	57.1	831.481	8	-0.4	416.748	15.21														0														43108													0
NALENYAYNM(+15.99)R	57.07	1373.6	11	-2.6	687.807	15.79																				5991.3				4386.1
MSAMDSSSR	57.03	970.385	9	2.2	486.199	11.13						9267.7
YIIIGDTGVGK	56.99	1134.63	11	1.3	568.319	17.68		28456
LNTDDAYASSETK	56.98	1413.63	13	-0.1	707.817	12.25
AC(+57.02)DLGLEVKPWIK	56.97	1527.81	13	-5.4	764.909	18.98																	6535.8
IAEGYEM(+15.99)ASR	56.93	1141.51	10	2.2	571.759	11.93																		26625			49693
TAIIEGDVVGGTC(+57.02)VNR	56.91	1659.83	16	-0.1	830.917	16.46																																					0
GQFGVTYLVTHK	56.89	1348.71	12	-0.8	675.361	17.51																							6319.7
GADGGPWR	56.88	814.372	8	-0.1	408.191	13.11					14801
TLVIDHK	56.86	824.476	7	1.2	413.243	12.13								22552																																			35787
NHEEEM(+15.99)KDLR	56.84	1315.58	10	1.6	439.533	10.39													77580
NMMC(+57.02)AADPR	56.75	1064.42	9	1.7	533.216	13.09												20121
VVIDAFR	56.74	818.465	7	-0.4	410.238	17.12						54203																						25353
SEGGYVWAC(+57.02)K	56.73	1155.5	10	0.3	578.758	15.65																																									26449
IHPM(+15.99)TIIAGYR	56.69	1286.68	11	0.1	644.345	15.05																																		40977
NFASNAAAFSSAFTTAM(+15.99)IK	56.66	1964.93	19	2.3	983.47	21.25				0
VVSSM(+15.99)FNTVSGKK	56.66	1398.72	13	1.5	700.364	12.33
M(+42.01)EASAGLVAGSHNR	56.65	1440.68	14	0.1	721.343	16.24
IVSSIEQK	56.65	902.507	8	1	452.259	12.11																					13331
ALTVPELTQQMWDAK	56.63	1729.87	15	-0.8	865.938	21.7					12099										11094
IC(+57.02)DFGLAR	56.63	950.464	8	2.2	476.24	16.77																														8317.8
LSSPATLN(+.98)SR	56.49	1045.54	10	-1.3	523.775	13.37														0
INPDVDPQVHPYVATGNK	56.46	1962.98	18	-0.4	655.334	15.29
APTQFGEVVAR	56.4	1173.61	11	1.9	587.812	15.78		41618									0
TYDLNFKEEN(+.98)NNGSQK	56.4	1900.84	16	2.6	634.621	14.41																							27650
LALEEIKLK	56.4	1055.66	9	1	528.837	17.44																														8049	30405		50372
IGLGGRGGSGGSYGR	56.39	1349.68	15	1	450.899	12.15
TEKPMLK	56.38	845.468	7	1.1	423.74	11.07																					6659
ATSLSSASVDDAAVIEELIAK	56.32	2089.08	21	-0.7	1045.55	24.04																																0
TYPEEMIQTGISTIDVMNSIAR	56.27	2468.19	22	0.6	1235.1	24.79															4224.3
KPSGGIESLR	56.26	1042.58	10	-4	522.294	12.41
QFDGLVDVYRK	56.23	1338.69	11	2.5	447.237	16.69				196370						122340								65425			209440					165370																10302
FDLTGVPPAPR	56.22	1168.62	11	0.9	585.32	19.23																																						38875
N(+.98)GHVEIIANDQGNR	56.21	1536.73	14	2.7	769.373	13.89
VTYPIM(+15.99)ADPDR	56.2	1292.61	11	2.2	647.309	15.14		58410									0
SGDELTSLK	56.2	948.476	9	-3.1	475.244	14.23																								5604.8
VGQAVDVVGQAGRPK	56.15	1479.82	15	-4.4	740.912	13.16
EVLPM(+15.99)GPTIIYNVPSR	56.14	1800.94	16	-0.7	901.479	19.81																												10053
GSYGSGGSSYGSGGGSYGSGGGGGGHGSYGSGSSSGGYR	56.11	3311.3	39	6.4	1104.78	12.07																																		0
SQYEQLAEQ(+.98)N(+.98)RK	55.98	1494.7	12	6.1	748.356	11.93																		0
FEELNNDLFR	55.87	1295.61	10	2.2	648.816	18.69																																						24217			28013
TMEINPENSIMDELRK	55.82	1918.91	16	0.7	640.645	19.07																																						0
LDVLSGLPEIK	55.79	1182.69	11	-0.1	592.35	21.53					7413.1																				26733
MMIEETKR	55.76	1036.5	8	1.9	519.258	11.93																					0
GYYGEC(+57.02)GKR	55.76	1088.47	9	4.4	545.242	10.86												4683.7
N(+.98)LSEIPDFK	55.73	1062.52	9	-4.7	532.264	13.59			108620
LLIQNQ(+.98)DEMIK	55.72	1344.7	11	5.7	673.355	17.71																					0
LLIQNQ(+.98)DEMLK	55.72	1344.7	11	5.7	673.355	17.71																					0
NC(+57.02)DPN(+.98)GPLM(+15.99)LYVSK	55.7	1623.73	14	-9.8	812.868	18.55																			15305
TGYHNMYK	55.6	1012.44	8	0.8	507.227	11.13
QFISHMK	55.58	889.448	7	1.2	445.73	12.01		111120	43820
MVNHFVQEFK	55.54	1277.62	10	-2.7	639.817	15.59				25398																22861	117380			19216
KPIEVSAPK	55.52	967.57	9	0.9	484.79	11.89		16550
YKTEEYSHTAVNK	55.43	1568.75	13	-0.5	785.376	10.94												0
TLHIVGPDKK	55.42	1106.64	10	0.7	554.327	12.06		4294.5							3087.2
IYDVGM(+15.99)K	55.38	840.405	7	-0.7	421.207	12.5									0		0			0
TSQNSELNNM(+15.99)QDLVEDYKK	55.37	2271.03	19	0.1	758.014	14.44													46254
NHYVEGGDAGNRENFIN(+.98)ELIR	55.34	2417.14	21	7.6	605.294	15.86																																		75159
YAGFTGVR	55.33	869.439	8	-1.6	435.726	14.92																																									12103
QPQYEPLPIEK	55.32	1340.7	11	1.3	671.354	16.95	22363																						31324
EVQFEDR	55.31	921.419	7	1.2	461.715	12.93		8334.2
FQAQADAVNLIC(+57.02)GAK	55.3	1604.8	15	-6.1	803.397	18.53																					44592
VLVNIEQQSPDIAQGVHGHFTK	55.25	2416.25	22	-0.9	806.419	16.61					40299
AVDSLLTAAK	55.24	987.56	10	-0.7	494.784	16.53			33239								46060			30450
ALTVPELTQQM(+15.99)WDSK	55.19	1761.86	15	0.5	881.935	18.69
QLFHPEQLISGKEDAANNFAR	55.13	2384.19	21	0.7	795.733	17.57					55201
LMPVGYGIKK	55.11	1104.64	10	-0.2	553.325	14.94																										67216
LLEVDNR	55.08	857.461	7	2.5	429.739	13.77				170740														140780			127860					1219.4
LTM(+15.99)FHGR	55.04	876.428	7	-3.6	439.219	11.22																	3705.1
VC(+57.02)ENIPIVLC(+57.02)GNKVDVK	55.01	1956.02	17	2.8	653.011	18.33																					26404
IGDLELFR	55	961.523	8	-1.4	481.77	20.28																											7117.5
AVYYDPETGKEDPSK	55	1697.78	15	2	849.894	12.97						35902
ALQQSTLK	54.96	887.508	8	0.3	444.759	11.84																107310
IRPVLTVNK	54.94	1038.65	9	-5.3	520.332	13.8																	26883
VIIGPATVGGVQAGAFK	54.94	1583.9	17	1.1	792.96	19.17																													17020
LGIAAEHGYFLR	54.9	1345.71	12	2.9	673.866	17.69
RYLEMFYALK	54.88	1332.69	10	0	667.352	19.68																																						30607
KGDLFLVR	54.82	946.56	8	0.4	474.287	16.62																	55246															7290.9
DSVVAGFQWASK	54.82	1293.64	12	-9.6	647.823	19.41																			0
APDDLDTR	54.8	901.414	8	1	451.713	11.79
FLEQQNK	54.79	905.461	7	0.2	453.735	11.98													67579
FASFIDK	54.78	826.423	7	0.8	414.217	16.59													75083
LAAEAVDKVIVPDFQPK	54.78	1839.01	17	-1.6	920.513	19.09
NMDEVVR	54.77	861.401	7	1.5	431.707	12.76		7493.2
VQ(+.98)LLEIAQVPDEHVNEFK	54.77	2108.08	18	5.1	703.704	20.2																																				0
VANPIVEMDGDEMTR	54.76	1675.75	15	0.1	838.885	18.3																												2620.1
NLC(+57.02)TAIAK	54.71	889.469	8	-4.2	445.74	13.9
LYQMQESGTLLFPAINVN(+.98)DSVTK	54.7	2568.28	23	0.5	1285.15	23.19																																				0
QLVNIPSFM(+15.99)VR	54.68	1318.71	11	-0.4	660.357	20.38
QLGWNPK	54.65	841.445	7	-0.5	421.729	15.18
VGELIGGSQR	54.64	1014.55	10	0.2	508.278	13.74						44007
IVLIGDSGVGK	54.6	1056.62	11	-0.3	529.314	17.08									170240		95972
LVLIGDSGVGK	54.6	1056.62	11	-0.3	529.314	17.08									170240		95972
LVLLGDSGVGK	54.6	1056.62	11	-0.3	529.314	17.08									170240		95972
LRGQ(+.98)AAASAAK	54.59	1043.57	11	1.8	522.792	10.52																					0
LASYLDK	54.54	808.433	7	0	405.222	13.76													239860
KMELDAFLK	54.5	1093.58	9	0.9	547.798	18.41	32770
LFGVTTLDVVR	54.5	1218.7	11	-5	610.356	21.33
LSEGYLTLAR	54.48	1121.61	10	-3.9	561.809	17.78																	8956
NTTIPTKK	54.48	901.523	8	-7.9	451.766	10.66																				1842.1
FPLC(+57.02)TLAETPR	54.47	1303.66	11	1.4	652.835	18.87					40702
EHVIKPVIPEK	54.4	1287.76	11	2.1	644.886	13.26							11176
ILPDGTGK	54.4	799.444	8	1.3	400.728	12.37												20699
TYDLNFKEENNNGSQ(+.98)K	54.39	1900.84	16	0.4	951.43	14.57
LADLEAAPAAVAR	54.39	1266.69	13	-5.3	634.351	16.49																	5430.4					3376.3
DSIGFIVHEDAK	54.32	1329.66	12	-1.2	665.831	16.93											0
YIC(+57.02)ENQDSISSK	54.3	1442.63	12	-0.9	722.324	12.55																																											42912
AYHEQLSVAEITNSAFEPSSMM(+15.99)AK	54.29	2656.21	24	1.6	886.41	19.17															0
QSVLGAITSAQQR	54.26	1357.73	13	-6.4	679.869	17.72																																					4121.9
IKEWYEK	54.22	994.512	7	0.4	498.261	13.29													329100
STVGTPAYIAPEVLSR	54.22	1659.88	16	0.4	830.945	19.29				8024.5
NFASNAAAFSSAFTTAMIK	54.21	1948.94	19	0	975.475	23.46																										8961.4
AFLVEEQK	54.2	962.507	8	0.2	482.259	15.29
YMNSFTK	54.2	889.4	7	0.6	445.706	13.44						22156
ALANSLAC(+57.02)QGK	54.19	1131.57	11	-1.5	566.789	13.24
AEEEFEK	54.16	880.381	7	-4.6	441.194	11.65															5090.5
LELELAEVEM(+15.99)PGLMAC(+57.02)R	54.15	1975.94	17	3.3	988.981	21.58
EAEEFAEEDKKVK	54.13	1550.75	13	-7.8	776.37	11.44				12554				0
DLTDSLMK	54.12	921.448	8	1.7	461.732	17.26																												29285
AVLM(+15.99)DLEPGTM(+15.99)DSVR	54.1	1664.77	15	0.1	833.392	16.96
DAGVIAGLNVMR	54.09	1214.64	12	-0.2	608.329	19.95																																						10543
TREGNDLYR	54.05	1122.54	9	-0.4	562.276	11.28																							0
TQGIALSLGDK	53.98	1101.6	11	-0.8	551.808	17.01																																	0
EAMSEPGEFLMSDFSK	53.9	1803.77	16	-0.7	902.891	21.67																																3018.1
LLAC(+57.02)ISSRPGQC(+57.02)GR	53.87	1573.78	14	1.4	525.599	13.92																		18325			51013
AGM(+15.99)SYFHETIWK	53.86	1484.68	12	-4.4	743.342	16.95																	21233
M(+15.99)AGQFAKPR	53.86	1020.52	9	0.3	511.264	10.98
GLVNNKDLDQLK	53.85	1355.74	12	1	678.876	14.57
IDHKFDLMYAK	53.84	1379.69	11	1.5	460.903	15.71												80043
KLPIHHIPGPEGVR	53.82	1548.89	14	-0.2	517.301	13.06					23133
LESMEPC(+57.02)SSVKDR	53.79	1536.69	13	1.9	769.351	12.43						3284.5
GLDVIQQAQ(+.98)SGTGK	53.75	1401.71	14	5.3	701.862	16.44												0
LEPVVAKPHSPDNR	53.74	1557.83	14	-0.5	520.28	11.92					17706
AGFVAQVGR	53.7	903.493	9	1	452.752	14.67						33078
FDLMYAK	53.68	886.426	7	1.2	444.219	17.94												42452
APGGAPAN(+.98)VAC(+57.02)AITK	53.64	1397.7	15	2.3	699.857	15.81																												15583
QGVDADIN(+.98)GLR	53.62	1157.57	11	1.2	579.789	14.95														12344
IKDILPPGSIDNTTK	53.61	1610.89	15	0.7	537.967	16.08																					26301
NM(+15.99)QDMVEDYR	53.61	1315.52	10	1	658.763	13.98													102860
VFEDNVLVR	53.59	1089.58	9	0.8	545.799	17.26																												22265
TYPEEMIQTGISTIDVM(+15.99)NSIAR	53.59	2484.19	22	1.7	1243.1	21.79																							3104.9
EVSSYLK	53.59	824.428	7	-0.7	413.219	13.68					143570
IEELVGVPVHYIGVGPGR	53.58	1890.04	18	-1.9	631.018	19.85																									0
YMAC(+57.02)C(+57.02)LMYR	53.57	1266.5	9	2.1	634.256	16.99												28613
VIPAGLQK	53.53	824.512	8	0.7	413.262	13.83
DAFLGSFLYEYSR	53.52	1566.74	13	-4	784.372	23.73
FWEVIC(+57.02)DEHGIDQTGK	53.51	1932.87	16	7	645.298	18.16																							0
HLEENLK	53.48	881.461	7	-6.5	441.736	11.07																				7281.4
VLDVGC(+57.02)GIGGPLR	53.47	1311.7	13	-0.9	656.855	18.55																												0
AMDGLPVTIR	53.45	1071.57	10	-4.7	536.792	18.53																	0
N(+.98)EDKLEFSK	53.41	1109.52	9	4.9	555.769	12.74				0
GELATALRK	53.4	957.561	9	0.8	479.786	12.56		46192
RGQVLEVDGEK	53.36	1228.64	11	1.5	615.326	12.36			15735
IFDNMQKPAFVFDGR	53.35	1783.87	15	1.2	595.632	19.52																																				0
YVLPDENLR	53.29	1117.58	9	0.6	559.796	16.77																															10573
QMMQEEQPLQVAR	53.21	1586.75	13	1.6	794.382	15.76												40804
NYVDM(+15.99)DEYPVTTELQNR	53.18	2101.93	17	3.7	1051.97	17.18
YEAAGIWYEHR	53.16	1393.64	11	2.6	697.83	16.22																																									18530
LVAFISGVPAR	53.15	1128.67	11	2.4	565.339	19.43							5392.3
FFTEALR	53.13	882.46	7	0.6	442.236	17.34																							10249
VQQLLQDFFN(+.98)GK	53.12	1436.73	12	8.2	719.378	21.8																								88048											0
DIIM(+15.99)VDHM(+15.99)R	53.1	1160.53	9	0.5	581.271	13.53
AGM(+15.99)IFYR	53.09	872.421	7	0.1	437.216	14.9					48297
LVLTM(+15.99)PASMSM(+15.99)ER	53.08	1496.7	13	1.6	749.357	15.94																52346
SYSEDDIHK	53.07	1092.47	9	-1.5	547.243	11.21			12409																																								2031.8
QSVEADINGLRR	53.06	1356.71	12	0.3	679.36	14.62													120200
QLTQVYGFYDEC(+57.02)QR	53.06	1805.8	14	-0.1	903.909	18.16																												11193
TIYVGNLPGDIR	53.05	1316.71	12	1.5	659.363	18.72																												10698
AYHEQLSVAEITNSAFEPSSMMAK	53.02	2640.22	24	3	881.083	20.11																																				0
AIGSGSEGADSSLQEQFNK	53.02	1923.88	19	2.3	962.945	15.32		28990
TEAAPAVPEEEKK	52.98	1397.7	13	-5.2	699.856	11.74			16651								13806																																5419.4
TALVTGGTR	52.96	874.487	9	0	438.249	12.18																		12856
NFAIDFLM(+15.99)GGVSAAVSK	52.96	1741.87	17	-0.5	871.938	23										4376.2
VLPELNGK	52.94	868.502	8	0.6	435.258	15.16																												0
SAPIYTQPR	52.94	1031.54	9	1.4	516.775	13.26												0
FFGHVEISPDGK	52.88	1331.65	12	-4.8	666.83	16.26																								7339.7
M(+15.99)EVPYC(+57.02)IVK	52.86	1153.55	9	0	577.78	16.49										60260
NTPLHYAAGYGR	52.84	1318.64	12	2	440.553	13.56																					4171
HIDISSDFTPK	52.77	1258.62	11	0.6	630.317	15.89																																	13160
MGTPALTSR	52.77	932.475	9	3.9	467.245	13.57
IQN(+.98)GGTEVVEAK	52.74	1244.62	12	1.7	623.318	12.49						0
LKYALTYR	52.69	1026.59	8	2.9	514.299	14.52				95913
KEPLTVYGDGK	52.68	1205.63	11	-0.2	603.819	13.01						30069
INPLVPVDLVIDHSVQVDVAR	52.67	2297.27	21	-0.1	766.765	23.67																																0
TM(+15.99)EINPENSIMDELR	52.64	1806.81	15	-2.4	904.411	19.2																								5541.9
ITITNDK	52.62	803.439	7	-1.6	402.724	12.14							18046
LQLVEAEK	52.62	928.523	8	1	465.269	14.84																												64470
VDGQLAVAR	52.6	927.514	9	-1.6	464.761	13.28				0
VQQLLQDFFN(+.98)GKELC(+57.02)K	52.58	1966.98	16	-1.6	984.497	20.78																								10279
ELINSWVESQTNGIIR	52.53	1857.96	16	0.4	929.984	21.13															2639.1
SDETVSMIESYLR	52.45	1528.71	13	1	765.362	20.58
LFQVEYAMEAVK	52.41	1426.72	12	-1.4	714.361	20.53						11919
QM(+15.99)IC(+57.02)C(+57.02)C(+57.02)NK	52.34	1128.42	8	2	565.216	10.76												20879
TSPQ(+.98)WLGPQIEVIR	52.31	1623.86	14	0.7	812.939	21.28																																						0
KFGGDTPYSIM(+15.99)FGPDIC(+57.02)GYSTK	52.28	2456.1	22	0.1	819.705	19.36
NAVFGDSSALAPGGVR	52.27	1516.76	16	2.4	759.388	17.27	6804.2
KTAEAVDILK	52.24	1086.63	10	-3.1	544.32	14.64																								30721
MTLDDFR	52.23	896.406	7	-0.6	449.208	17.2																		10188
ERLDAELK	52.22	972.524	8	0.4	487.267	12.72									211500
YTQGFSGADITEIC(+57.02)QR	52.21	1844.84	16	0.3	923.426	17.75
DDNPNLPR	52.21	939.441	8	-1.3	470.727	12.64																																											8336.3
NYLHFVK	52.18	919.492	7	1	460.752	15.01
VLVELAELQDR	52.1	1283.71	11	3.3	642.864	19.38																													2085.3
VYTDVNVVRPK	52.06	1288.71	11	-0.5	645.361	13.69																0
LASSC(+57.02)DIMGLNYYTSR	52.06	1849.83	16	-1.6	925.923	19.45																																									0
EIAEAFLGTTVK	52.03	1277.69	12	-4.6	639.845	19.19				0
GDLFLVR	52.01	818.465	7	8.5	410.243	19.09
KFMNKPVR	52.01	1018.57	8	1.6	510.293	10.81												30515
GFGSEFR	51.96	798.366	7	-5.1	400.188	14.98																						7379.4
AETQSVDFQTK	51.96	1252.59	11	1.6	627.302	13.18				61199
GKFEELC(+57.02)SDLLDR	51.94	1580.75	13	0.4	791.383	18.22																																						4060.5
QHGIEIR	51.92	851.461	7	1.8	426.736	11.89									0												12083
LTNSLM(+15.99)M(+15.99)HGR	51.89	1190.55	10	1.2	596.282	11.16									112900
ITIKPQTDR	51.81	1070.61	9	1.9	536.311	11.92															15499
SAGTGIGLEFR	51.79	1106.57	11	-0.4	554.293	17.95																																									14947
KNWQNVR	51.73	943.499	7	0.3	472.754	11.19								164590
AVC(+57.02)TEAGMFALR	51.67	1324.63	12	-0.1	663.321	18.96																																									15295
VFISDDFDGELFPR	51.66	1655.78	14	-2.4	828.897	22.37																																						9036.8
VAILGAAGGIGQPLALLMK	51.64	1792.06	19	-1.9	897.034	24.98																3477.9
LWATNEVR	51.58	987.514	8	0.2	494.762	15.37									93696
TIQLEYTDAK	51.53	1180.6	10	2.3	591.305	15.62																							7474.2
AGHQTSAESWGTGR	51.51	1443.65	14	2.1	482.223	11.72							4264.6
DTTLNGGVEQMYTEMASR	51.51	2001.88	18	1.6	1001.94	20.16
AC(+57.02)AAQTNATFLK	51.5	1294.63	12	-5.4	648.318	14.78							27212
VVVTGGAGFVGSHLVDR	51.47	1668.89	17	-3.1	835.448	17.14																20815
FFDPEFYR	51.4	1119.5	8	0.1	560.756	19.33																20864
EIIETNPK	51.38	942.502	8	-0.4	472.256	12.59
LVLANALYFK	51.37	1150.67	10	-1.5	576.341	21.13																		0
GYEVLYMVDAIDEYAIGQLK	51.36	2289.12	20	1.2	1145.57	27.34																																						6775.1
QFYVNVEKEEWK	51.33	1597.78	12	1.8	533.598	16.83												32604
IDMVENR	51.32	875.417	7	1.1	438.714	12.91												122250
LLGGLAVR	51.27	797.512	8	-1	399.761	17.23													903410
KLAVNLIPFPR	51.27	1266.78	11	-2.3	423.267	20.47																									6480.2
IGINGFGR	51.22	832.456	8	-0.1	417.233	16.5						42118
LESMEPC(+57.02)SSVK	51.22	1265.56	11	1.8	633.787	13.43						72156
LM(+15.99)PVGYGIKK	51.19	1120.63	10	1.1	561.321	13.5				48382																	49139
LGLVTGGEIASTFDNPESVK	51.14	2033.03	20	1.2	1017.52	20.68																					49660
KQTALVELVK	51.12	1127.69	10	-5.8	564.85	15.99																																											0
GLDVIQQ(+.98)AQSGTGK	51.09	1401.71	14	5.5	701.863	16.14												0
AQQIC(+57.02)AVLYPGDATEEGK	51.07	1948.92	18	0.1	975.467	17.72																																								5168.5
EGIPPDQQR	51.06	1038.51	9	4.1	520.262	11.55			62080
KPLFPGR	51.04	813.486	7	0	407.75	13.6
VLDVYEAR	51.01	963.503	8	1.6	482.757	15.22								73074
THNLIVR	50.99	851.498	7	1.3	426.755	12.2
GMLKEEVER	50.97	1089.55	9	2.1	545.78	12.17												0
TTQALFYNYK	50.92	1247.62	10	0.8	624.817	17.22																																											0
Q(+.98)IFNGVFLK	50.89	1065.59	9	0.7	533.799	20.41																																		246460
VSAANSRPPNPQ	50.87	1236.62	12	7.7	619.32	11.2							0
VVLAPLTR	50.85	867.554	8	0.5	434.784	17.05																														0
QMSLLLR	50.85	859.495	7	-0.1	430.753	18.5																							43049
EMIESGVIK	50.83	1004.52	9	1	503.267	15.28																							26056
IKNILPSGSVDNTTK	50.79	1585.87	15	1.1	793.938	14.6				13346
KLLEGEEC(+57.02)R	50.73	1132.55	9	5.2	567.285	11.53													0
TGEEDKAAAATGEHKPSA	50.63	1768.82	18	1.6	590.613	10.8		12826
FKDLGEENFK	50.59	1225.6	10	0	613.806	14.27																																											46128
LSIGAAC(+57.02)R	50.58	846.438	8	-5.9	424.224	14.01
SPNSETYVIFGEAK	50.58	1540.74	14	1.4	771.375	18.52				12714
LKFEDYFSNR	50.58	1317.64	10	-2.4	659.823	17.71
VLPELN(+.98)GK	50.58	869.486	8	4	435.752	15.6																										47117
YIHSANVLHR	50.5	1208.64	10	2.6	605.327	11.84							12418
KIAVLGFAFK	50.47	1092.67	10	-0.6	547.339	20.02					0
LDYVLALTVENFLER	50.45	1793.96	15	6	897.987	26.97
YGGFLNR	50.42	825.413	7	0.4	413.714	15.51																																	5372.9
SQMQEIIPEQQDR	50.4	1600.75	13	-2	801.381	16.33																																									0
WIHPSSGR	50.35	938.472	8	1.5	470.241	11.87																					82769
FGGDTPYSIMFGPDIC(+57.02)GYSTK	50.33	2312.01	21	2	1157.02	22.76																							19598				2302
LTMFHGR	50.32	860.433	7	-5	431.221	13.35																	7621.3
DAIDQGADVR	50.29	1058.5	10	2.3	530.256	12.49																38820
TVLIM(+15.99)ELINN(+.98)VAK	50.25	1473.81	13	-1.3	737.909	20.75																							5922.5
IEITNDPK	50.24	928.486	8	2.6	465.25	12.72						53068
IETELSK	50.23	818.438	7	1	410.225	12.27																					121510
FDASKFPTR	50.23	1067.54	9	1.3	534.776	13.97							19445
QVSVTWDAYEATK	50.22	1496.71	13	-1	749.364	18.01
NM(+15.99)SVIAHVDHGK	50.2	1322.64	12	-4.5	441.885	11.18																						2454.2
YGSGGGSKGGSISGGGYGSGGGK	50.18	1889.85	23	-0.2	630.955	11.08							0
EEVVTVETWQEGSLK	50.15	1732.85	15	1.5	867.435	18.25																													0
QIPYTMMK	50.14	1010.49	8	1.4	506.254	16.67																												21309
AN(+.98)GHIFNVGNPN(+.98)NEVTVR	50.14	1952.93	18	-0.2	651.985	16.97																																									6493.7
GGGGSFGYSYGGGSGGGFSASSLGGGFGGGSR	50.1	2704.15	32	-4.1	1353.08	27.83
LEPFIADTVHVLNESIR	50.05	1952.04	17	-0.3	651.686	22.76																									4294.9
[truncated: 105 more columns]

## Sheet:  Table S4-2
Table S2-2 List of proteins identified in protein extracts, isolated from Triticum aestivum
Protein Group	Protein ID	Accession	-10lgP	Coverage (%)	Coverage (%)
					Control-1	Antimycin A-1	NO2-1	GSNO-1	Control-2	Antimycin A-2	NO2-2	GSNO-2	Control-3	Antimycin A-3	NO2-3	Antimycin A-4	GSNO-3	Control-4	Antimycin A-5	NO2-4	GSNO-4	Control-5	Antimycin A-6	NO2-5	GSNO-5	Control-6	NO2-6	Antimycin A-7	NO2-7	GSNO-6	Control-7	Antimycin A-8	NO2-8	GSNO-7	Control-8	Antimycin A-9	NO2-9	GSNO-8	GSNO-9	Control-9	Antimycin A-10	NO2-10	GSNO-10	Control-10	Antimycin A-11	NO2-11	GSNO-11	Control-11	Control-12
345	2022	Q8LAH7|OPR1_ARATH	50.85	2	0	0	0	0	0	0	0	0	0	0	0	0	0	0	0	0	0	0	0	0	0	0	0	0	0	0	0	0	0	2	0	0	0	0	0	0	0	0	0	0	0	0	0	0	0
345	1115	Q8GYB8|OPR2_ARATH	50.85	2	0	0	0	0	0	0	0	0	0	0	0	0	0	0	0	0	0	0	0	0	0	0	0	0	0	0	0	0	0	2	0	0	0	0	0	0	0	0	0	0	0	0	0	0	0
154	220	P48347|14310_ARATH	139.02	10	0	0	0	10	0	0	0	0	0	6	0	0	0	0	0	0	0	6	0	0	7	0	0	0	0	4	0	0	0	0	0	0	0	3	0	0	0	4	0	0	0	0	0	0	0
95	258	P48348|14338_ARATH	144.97	13	0	0	0	7	0	0	0	3	0	3	0	0	3	0	0	0	0	3	0	0	10	0	0	0	0	7	0	0	3	0	0	0	0	6	0	0	0	4	0	0	0	3	0	0	0
95	277	P48349|14336_ARATH	144.97	13	0	0	0	7	0	0	0	3	0	3	0	0	3	0	0	0	0	3	0	0	10	0	0	0	0	7	0	0	3	0	0	0	0	6	0	0	0	4	0	0	0	3	0	0	0
16	137	Q96300|14337_ARATH	245.19	26	0	0	5	26	0	5	0	12	5	22	0	0	12	0	0	5	0	22	0	0	26	5	0	0	0	18	0	0	3	0	0	0	0	18	0	0	0	4	0	0	0	7	12	0	0
22	148	P46077|14334_ARATH	228.62	20	0	0	4	20	0	4	0	7	4	16	0	0	10	0	0	4	0	16	0	0	20	4	0	0	0	16	0	0	3	0	0	0	0	13	0	0	0	4	0	0	0	7	7	0	0
43	211	P42644|14333_ARATH	211.9	20	0	0	0	20	0	0	0	3	0	16	0	0	6	0	0	0	0	16	0	0	20	0	0	0	0	14	0	0	3	0	0	0	0	9	0	0	0	4	0	0	0	7	0	0	0
97	107	Q6W8Q2|REHY_WHEAT	195.59	27	0	22	23	0	0	0	0	0	14	0	23	0	0	23	0	0	0	0	0	0	0	0	0	0	0	0	0	0	0	0	0	0	0	0	0	0	0	0	0	0	0	0	0	0	0
337	1673	O65282|CH20_ARATH	62.4	4	0	4	0	0	0	0	0	0	0	0	0	0	0	0	0	0	0	0	0	0	0	0	0	0	0	0	0	0	0	0	0	0	0	0	0	0	0	0	0	0	0	0	0	0	0
297	246	Q9LP45|PSD11_ARATH	59.65	2	0	0	0	0	0	0	0	0	0	0	0	0	0	0	0	0	0	0	0	0	0	0	0	0	0	0	0	0	0	0	0	0	2	0	0	0	0	0	0	0	0	0	0	0	0
146	187	Q9FIB6|PS12A_ARATH	162.43	8	0	0	2	0	2	0	0	0	0	0	0	5	0	0	0	0	0	0	0	0	0	0	0	0	0	0	0	0	0	0	0	0	6	0	0	0	2	0	0	0	0	0	0	0	2
186	285	Q9LT08|PSDE_ARATH	111.79	6	0	0	0	4	0	6	0	0	0	0	0	0	0	0	0	4	0	0	0	0	0	0	0	0	0	0	0	6	0	0	0	0	0	0	0	0	0	0	0	0	0	0	0	0	0
231	189	Q9SIV2|PSD2A_ARATH	132.76	4	0	0	0	0	0	0	0	0	0	0	0	0	0	0	0	0	3	0	0	0	0	0	0	0	0	0	0	0	0	0	0	2	0	0	0	0	0	0	0	0	0	0	0	0	0
231	178	Q6XJG8|PSD2B_ARATH	132.76	4	0	0	0	0	0	0	0	0	0	0	0	0	0	0	0	0	3	0	0	0	0	0	0	0	0	0	0	0	0	0	0	2	0	0	0	0	0	0	0	0	0	0	0	0	0
251	218	Q9LNU4|PSD3A_ARATH	97.77	5	0	0	0	0	0	0	0	0	0	0	0	0	0	0	0	0	0	0	0	0	0	0	2	0	0	0	2	0	0	0	0	0	0	0	0	0	0	0	0	0	0	0	0	0	1
308	304	O82143|PSMDA_ORYSJ	55.3	4	0	0	0	0	0	0	0	0	0	0	0	0	0	0	0	0	0	0	0	0	4	0	0	0	0	0	0	0	0	0	0	0	0	0	0	0	0	0	0	0	0	0	0	0	0
107	320	Q9SEI3|PS10A_ARATH	125.79	6	0	0	3	6	3	0	3	0	0	3	0	3	3	3	0	0	0	3	0	0	0	0	0	0	0	0	0	0	0	0	3	0	0	3	0	0	3	0	3	0	6	3	0	0	3
110	238	Q9SEI2|PS6AA_ARATH	119.57	6	0	0	3	3	3	0	6	0	0	3	0	3	3	3	0	0	0	3	0	0	0	0	0	0	0	0	0	0	0	0	3	0	0	3	0	0	3	0	3	0	3	3	0	0	3
110	263	O04019|PS6AB_ARATH	119.57	6	0	0	3	3	3	0	6	0	0	3	0	3	3	3	0	0	0	3	0	0	0	0	0	0	0	0	0	0	0	0	3	0	0	3	0	0	3	0	3	0	3	3	0	0	3
89	83	Q9SEI4|PRS6B_ARATH	202.66	17	0	0	3	3	12	0	5	0	0	5	0	12	3	3	0	0	0	3	0	0	0	0	0	0	0	0	0	0	0	0	3	0	0	3	0	0	3	0	3	0	3	3	0	0	12
258	128	Q9SSB5|PRS7A_ARATH	100.52	7	0	0	0	0	0	0	0	0	0	0	0	3	0	0	0	0	0	0	0	0	0	0	0	0	4	0	0	0	0	0	0	0	0	0	0	0	0	0	0	0	0	0	0	0	0
109	156	Q9C5U3|PRS8A_ARATH	149.17	10	0	0	3	3	3	0	3	0	0	3	0	3	3	3	0	0	0	3	0	0	0	0	0	0	0	0	0	0	0	0	3	0	0	3	0	0	3	0	3	0	10	3	0	0	3
109	164	Q94BQ2|PRS8B_ARATH	149.17	10	0	0	3	3	3	0	3	0	0	3	0	3	3	3	0	0	0	3	0	0	0	0	0	0	0	0	0	0	0	0	3	0	0	3	0	0	3	0	3	0	10	3	0	0	3
107	318	Q9MAK9|PS10B_ARATH	125.79	6	0	0	3	6	3	0	3	0	0	3	0	3	3	3	0	0	0	3	0	0	0	0	0	0	0	0	0	0	0	0	3	0	0	3	0	0	3	0	3	0	6	3	0	0	3
131	127	P80602|BAS1_WHEAT	206.62	29	0	10	6	0	0	0	0	0	10	0	29	0	0	6	0	0	0	0	0	0	0	0	0	0	0	0	0	0	0	0	0	0	0	0	0	0	0	0	0	0	0	0	0	0	0
330	525	Q94AR8|LEUC_ARATH	53.74	3	0	0	0	0	3	0	0	0	0	0	0	0	0	0	0	0	0	0	0	0	0	0	0	0	0	0	0	0	0	0	0	0	0	0	0	0	0	0	0	0	0	0	0	0	0
353	1394	P52410|KASC1_ARATH	50.23	2	0	0	0	0	0	0	2	0	0	0	0	0	0	0	0	0	0	0	0	0	0	0	0	0	0	0	0	0	0	0	0	0	0	0	0	0	0	0	0	0	0	0	0	0	0
283	439	P42733|RS113_ARATH	52.18	4	0	0	0	0	0	0	0	0	0	0	0	0	0	0	0	0	0	0	0	0	0	0	0	0	0	0	0	0	0	0	0	0	0	0	0	0	0	0	0	0	0	0	0	0	0
164	616	Q8L8Y0|RS21_ARATH	130.56	6	0	0	0	6	0	0	0	0	0	6	0	0	0	0	0	0	0	6	0	0	6	0	0	0	0	6	0	0	0	0	0	0	0	0	0	0	0	0	0	0	0	0	0	0	0
164	784	Q93VB8|RS22_ARATH	130.56	6	0	0	0	6	0	0	0	0	0	6	0	0	0	0	0	0	0	6	0	0	6	0	0	0	0	6	0	0	0	0	0	0	0	0	0	0	0	0	0	0	0	0	0	0	0
164	556	P49688|RS23_ARATH	130.56	6	0	0	0	6	0	0	0	0	0	6	0	0	0	0	0	0	0	6	0	0	6	0	0	0	0	6	0	0	0	0	0	0	0	0	0	0	0	0	0	0	0	0	0	0	0
164	957	Q9SCM3|RS24_ARATH	130.56	6	0	0	0	6	0	0	0	0	0	6	0	0	0	0	0	0	0	6	0	0	6	0	0	0	0	6	0	0	0	0	0	0	0	0	0	0	0	0	0	0	0	0	0	0	0
15	92	Q9FJA6|RS33_ARATH	273.44	30	0	8	8	12	0	0	0	21	5	10	5	0	29	5	0	0	0	26	0	0	19	0	0	0	0	5	0	0	5	0	0	0	0	23	0	0	0	0	0	0	0	5	23	0	0
37	171	Q93VH9|RS41_ARATH	240.15	22	0	0	4	22	0	0	0	0	4	19	0	0	13	0	0	0	0	19	0	0	19	0	0	0	0	13	0	4	4	0	0	0	0	4	0	0	0	0	0	0	0	13	4	0	0
37	169	P49204|RS42_ARATH	240.15	22	0	0	4	22	0	0	0	0	4	19	0	0	13	0	0	0	0	19	0	0	19	0	0	0	0	13	0	4	4	0	0	0	0	4	0	0	0	0	0	0	0	13	4	0	0
37	140	Q8VYK6|RS43_ARATH	240.15	22	0	0	4	22	0	0	0	0	4	19	0	0	13	0	0	0	0	19	0	0	19	0	0	0	0	13	0	4	4	0	0	0	0	4	0	0	0	0	0	0	0	13	4	0	0
233	390	Q9ZUT9|RS51_ARATH	81.19	5	0	0	0	0	0	0	0	0	5	0	0	0	0	0	0	0	0	0	0	0	0	0	0	0	0	0	0	0	0	0	0	0	0	0	0	0	0	0	0	0	0	0	0	0	0
233	391	P51427|RS52_ARATH	81.19	5	0	0	0	0	0	0	0	0	5	0	0	0	0	0	0	0	0	0	0	0	0	0	0	0	0	0	0	0	0	0	0	0	0	0	0	0	0	0	0	0	0	0	0	0	0
28	291	O48549|RS61_ARATH	221.72	13	0	0	0	13	0	0	0	13	0	13	6	0	13	0	0	0	0	13	0	0	13	6	0	0	0	10	0	0	4	0	0	0	0	13	0	0	0	0	0	0	0	4	13	0	0
176	430	Q93VG5|RS81_ARATH	107.09	10	0	0	0	4	0	0	0	0	0	4	0	0	0	0	0	0	0	10	0	0	10	0	0	0	0	4	0	0	0	0	0	0	0	0	0	0	0	0	0	0	0	0	0	0	0
113	314	Q9FIF3|RS82_ARATH	161.15	17	0	0	0	11	0	0	0	0	0	17	7	0	0	0	0	0	0	11	0	0	11	7	0	0	0	11	0	0	0	0	0	0	0	0	0	0	0	0	0	0	0	0	0	0	0
104	139	Q9FLF0|RS92_ARATH	160.89	27	0	10	4	0	0	0	0	4	14	0	10	0	0	10	0	0	0	4	0	0	0	0	0	0	0	0	0	0	0	0	0	0	0	0	0	0	0	0	0	0	0	0	0	0	0
39	205	Q08682|RSSA1_ARATH	215.99	20	0	10	13	10	0	10	4	10	10	10	13	0	13	10	0	10	0	10	0	0	16	0	0	0	0	18	0	10	3	0	0	0	0	13	0	0	0	0	6	0	10	0	13	0	0
165	90	Q1XIR9|HGL1A_WHEAT	156.88	13	0	0	0	2	0	0	2	0	0	0	2	3	0	0	0	2	0	0	0	0	2	0	0	0	0	0	0	0	0	0	0	0	3	0	0	0	0	0	0	0	3	0	2	0	7
181	114	D5MTF8|HGL1D_WHEAT	120.07	7	0	0	0	0	0	2	2	0	0	0	0	2	0	0	0	4	0	0	0	0	0	0	0	0	0	0	0	0	0	0	0	0	0	0	0	0	0	0	0	0	3	0	0	0	5
346	446	P24846|DAPA1_WHEAT	56.14	4	0	0	0	0	0	0	0	0	0	0	0	0	0	0	0	0	0	0	0	0	0	0	0	0	0	0	0	4	0	0	0	0	0	0	0	0	0	0	0	0	0	0	0	0	0
17	81	O50008|METE1_ARATH	285.94	15	0	1	1	0	0	2	1	0	1	0	1	0	0	1	0	1	0	0	1	12	0	2	0	11	0	0	0	2	0	1	1	0	1	1	8	1	0	14	1	10	1	0	1	1	0
214	1050	Q42112|RLA02_ARATH	90.97	5	0	0	0	0	0	5	0	0	0	2	0	0	0	0	0	5	0	2	0	0	0	0	0	0	0	0	0	0	0	0	0	0	0	0	0	0	0	0	0	0	0	0	0	0	0
35	146	Q93VT9|RL101_ARATH	203.51	21	0	21	18	5	0	5	5	18	21	0	21	0	18	18	0	5	0	0	0	0	9	0	0	0	0	5	0	0	0	0	0	0	0	17	5	0	0	0	0	0	0	0	5	0	0
35	176	Q08770|RL102_ARATH	203.51	21	0	21	18	5	0	5	5	18	21	0	21	0	18	18	0	5	0	0	0	0	9	0	0	0	0	5	0	0	0	0	0	0	0	17	5	0	0	0	0	0	0	0	5	0	0
35	190	Q93W22|RL103_ARATH	203.51	21	0	21	18	5	0	5	5	18	21	0	21	0	18	18	0	5	0	0	0	0	9	0	0	0	0	5	0	0	0	0	0	0	0	17	5	0	0	0	0	0	0	0	5	0	0
70	161	Q8VZB9|R10A1_ARATH	225.1	19	0	4	4	0	0	0	0	19	0	4	4	0	15	0	0	0	0	4	0	0	4	0	0	0	0	0	0	0	6	0	0	0	0	15	0	0	0	0	0	0	0	0	15	0	0
72	177	P59230|R10A2_ARATH	216	19	0	4	4	0	0	0	0	19	0	4	4	0	15	0	0	0	0	4	0	0	4	0	0	0	0	0	0	0	6	0	0	0	0	15	0	0	0	0	0	0	0	0	15	0	0
75	145	P59231|R10A3_ARATH	222.04	18	0	4	4	0	0	0	0	18	0	4	4	0	12	0	0	0	0	4	0	0	4	0	0	0	0	0	0	0	6	0	0	0	0	15	0	0	0	0	0	0	0	0	12	0	0
211	335	P42795|RL111_ARATH	121.72	10	0	0	0	0	0	0	0	0	5	0	0	0	0	0	0	0	0	0	0	0	0	0	0	0	0	0	0	0	0	0	0	0	0	0	0	0	0	0	0	0	0	0	0	0	0
211	341	P42794|RL112_ARATH	121.72	10	0	0	0	0	0	0	0	0	5	0	0	0	0	0	0	0	0	0	0	0	0	0	0	0	0	0	0	0	0	0	0	0	0	0	0	0	0	0	0	0	0	0	0	0	0
207	729	P50883|RL121_ARATH	96.97	9	0	9	0	0	0	0	0	0	9	0	9	0	0	9	0	0	0	0	0	0	0	0	0	0	0	0	0	0	0	0	0	0	0	0	0	0	0	0	0	0	0	0	0	0	0
207	730	Q9LFH5|RL122_ARATH	96.97	9	0	9	0	0	0	0	0	0	9	0	9	0	0	9	0	0	0	0	0	0	0	0	0	0	0	0	0	0	0	0	0	0	0	0	0	0	0	0	0	0	0	0	0	0	0
207	727	Q9FF52|RL123_ARATH	96.97	9	0	9	0	0	0	0	0	0	9	0	9	0	0	9	0	0	0	0	0	0	0	0	0	0	0	0	0	0	0	0	0	0	0	0	0	0	0	0	0	0	0	0	0	0	0
92	264	P41127|RL131_ARATH	195.9	17	0	0	0	17	0	0	0	0	0	17	0	0	0	0	0	0	0	11	0	0	17	0	0	0	0	8	0	0	0	0	0	0	0	0	0	0	0	0	0	0	0	8	0	0	0
73	182	Q9FF90|RL133_ARATH	238.37	19	0	0	0	18	0	0	0	0	0	17	0	0	0	0	0	0	0	18	0	0	18	0	0	0	0	15	0	0	0	0	0	0	0	0	0	0	0	0	0	0	0	14	0	0	0
139	1877	Q9LRX8|R13A2_ARATH	67.51	4	0	4	4	0	0	0	0	0	4	0	4	0	0	4	0	0	0	0	0	0	0	0	0	0	0	0	0	0	0	0	0	0	0	0	0	0	0	0	0	0	0	0	0	0	0
139	5446	Q9SVR0|R13A3_ARATH	67.51	4	0	4	4	0	0	0	0	0	4	0	4	0	0	4	0	0	0	0	0	0	0	0	0	0	0	0	0	0	0	0	0	0	0	0	0	0	0	0	0	0	0	0	0	0	0
139	4291	Q9FKC0|R13A4_ARATH	67.51	4	0	4	4	0	0	0	0	0	4	0	4	0	0	4	0	0	0	0	0	0	0	0	0	0	0	0	0	0	0	0	0	0	0	0	0	0	0	0	0	0	0	0	0	0	0
204	4073	Q93VI3|RL171_ARATH	93.72	5	0	0	0	0	0	0	0	0	5	0	5	0	0	0	0	0	0	0	0	0	0	0	0	0	0	0	0	0	0	0	0	0	0	0	0	0	0	0	0	0	0	0	0	0	0
204	2141	P51413|RL172_ARATH	93.72	5	0	0	0	0	0	0	0	0	5	0	5	0	0	0	0	0	0	0	0	0	0	0	0	0	0	0	0	0	0	0	0	0	0	0	0	0	0	0	0	0	0	0	0	0	0
261	444	P42791|RL182_ARATH	67.72	6	0	0	0	0	0	0	0	0	6	0	0	0	0	0	0	0	0	0	0	0	0	0	0	0	0	0	0	0	0	0	0	0	0	0	0	0	0	0	0	0	0	0	0	0	0
261	433	Q940B0|RL183_ARATH	67.72	6	0	0	0	0	0	0	0	0	6	0	0	0	0	0	0	0	0	0	0	0	0	0	0	0	0	0	0	0	0	0	0	0	0	0	0	0	0	0	0	0	0	0	0	0	0
191	419	P51418|R18A2_ARATH	131.47	14	0	0	5	0	0	0	0	0	10	0	5	0	0	5	0	0	0	0	0	0	0	0	0	0	0	0	0	0	0	0	0	0	0	0	0	0	0	0	0	0	0	0	0	0	0
177	262	Q9LUD4|R18A3_ARATH	148.03	24	0	0	5	0	0	0	0	0	9	0	5	0	0	5	0	0	0	0	0	0	0	0	0	0	0	0	0	0	0	0	0	0	0	0	0	0	0	0	0	0	0	0	0	0	0
47	292	Q9SRX2|RL191_ARATH	188.09	9	0	9	9	0	0	0	0	9	9	0	9	0	8	9	0	0	0	0	0	0	4	0	0	0	0	0	0	0	0	0	0	0	0	9	0	0	0	0	0	0	0	0	8	0	0
47	231	P49693|RL193_ARATH	188.09	10	0	10	10	0	0	0	0	10	10	0	10	0	9	10	0	0	0	0	0	0	4	0	0	0	0	0	0	0	0	0	0	0	0	10	0	0	0	0	0	0	0	0	9	0	0
341	2614	Q8LD46|R23A1_ARATH	70.19	8	0	0	0	0	0	0	0	0	0	0	0	0	0	0	0	0	0	0	0	0	0	0	0	0	0	0	0	0	0	0	0	0	0	0	0	0	0	0	0	0	0	0	0	0	0
341	1616	Q9M3C3|R23A2_ARATH	70.19	8	0	0	0	0	0	0	0	0	0	0	0	0	0	0	0	0	0	0	0	0	0	0	0	0	0	0	0	0	0	0	0	0	0	0	0	0	0	0	0	0	0	0	0	0	0
236	909	Q9FJX2|RL262_ARATH	118.71	14	0	0	0	0	0	0	0	0	13	0	0	0	0	0	0	0	0	0	0	0	0	0	0	0	0	0	0	0	0	0	0	0	0	0	0	0	0	0	0	0	0	0	0	0	0
271	1893	Q9LR33|R27A2_ARATH	61.27	5	0	0	0	0	0	0	0	0	5	0	0	0	0	0	0	0	0	0	0	0	0	0	0	0	0	0	0	0	0	0	0	0	0	0	0	0	0	0	0	0	0	0	0	0	0
271	1892	P49637|R27A3_ARATH	61.27	5	0	0	0	0	0	0	0	0	5	0	0	0	0	0	0	0	0	0	0	0	0	0	0	0	0	0	0	0	0	0	0	0	0	0	0	0	0	0	0	0	0	0	0	0	0
32	84	P17094|RL31_ARATH	276.22	17	0	0	0	0	15	0	15	3	0	5	0	12	0	0	0	0	0	0	0	0	3	0	0	0	2	2	0	0	0	2	10	0	10	2	0	0	0	0	0	0	8	0	2	0	15
31	100	P22738|RL32_ARATH	278.73	17	0	0	0	0	15	0	15	3	0	5	0	12	0	0	0	0	0	0	0	0	3	0	0	0	8	2	0	0	0	0	8	0	8	2	0	0	0	0	0	0	11	0	2	0	15
356	3225	Q42351|RL341_ARATH	54.2	7	0	0	0	0	0	0	0	0	0	0	0	0	0	0	0	0	0	0	0	0	0	0	0	0	0	0	0	0	0	0	0	0	0	0	0	0	0	0	0	0	0	0	0	0	0
356	1739	Q9FE65|RL342_ARATH	54.2	7	0	0	0	0	0	0	0	0	0	0	0	0	0	0	0	0	0	0	0	0	0	0	0	0	0	0	0	0	0	0	0	0	0	0	0	0	0	0	0	0	0	0	0	0	0
356	4576	Q9LJW6|RL343_ARATH	54.2	7	0	0	0	0	0	0	0	0	0	0	0	0	0	0	0	0	0	0	0	0	0	0	0	0	0	0	0	0	0	0	0	0	0	0	0	0	0	0	0	0	0	0	0	0	0
302	561	Q9SF40|RL4A_ARATH	51.51	3	0	0	0	0	0	0	3	0	0	0	0	0	0	0	0	0	0	0	0	0	0	0	0	0	0	0	0	0	0	0	0	0	0	0	0	0	0	0	0	0	0	0	0	0	0
302	455	P49691|RL4B_ARATH	51.51	3	0	0	0	0	0	0	3	0	0	0	0	0	0	0	0	0	0	0	0	0	0	0	0	0	0	0	0	0	0	0	0	0	0	0	0	0	0	0	0	0	0	0	0	0	0
118	311	Q8LBI1|RL51_ARATH	180.08	11	0	0	0	0	0	11	0	0	0	0	0	0	0	0	0	11	0	0	0	0	0	0	0	0	0	0	0	5	0	0	0	0	0	0	0	0	0	0	3	0	0	0	0	0	0
118	305	P49227|RL52_ARATH	180.08	11	0	0	0	0	0	11	0	0	0	0	0	0	0	0	0	11	0	0	0	0	0	0	0	0	0	0	0	5	0	0	0	0	0	0	0	0	0	0	3	0	0	0	0	0	0
82	394	P60040|RL72_ARATH	183.94	13	0	5	5	0	0	0	0	9	5	0	5	0	9	5	0	0	0	0	0	0	0	0	0	0	0	0	0	0	4	0	0	0	0	12	0	0	0	0	0	0	0	0	9	0	0
64	276	Q9LHP1|RL74_ARATH	184.67	12	0	5	8	0	0	0	0	12	5	0	5	0	12	5	0	0	0	0	0	0	0	0	0	0	0	0	0	0	4	0	0	0	0	11	0	0	0	0	0	0	0	0	12	0	0
48	269	P49692|RL7A1_ARATH	183.77	12	0	0	0	12	0	0	0	0	0	12	0	0	0	0	0	0	0	12	0	0	12	0	0	0	0	9	0	0	0	0	0	0	0	0	0	0	0	0	0	0	0	5	0	0	0
48	222	Q9LZH9|RL7A2_ARATH	183.77	12	0	0	0	12	0	0	0	0	0	12	0	0	0	0	0	0	0	12	0	0	12	0	0	0	0	9	0	0	0	0	0	0	0	0	0	0	0	0	0	0	0	5	0	0	0
68	186	P46286|RL81_ARATH	196.77	16	0	4	0	11	0	0	0	4	4	11	4	0	0	4	0	0	0	11	0	0	16	0	0	0	0	7	0	0	0	0	0	0	0	0	0	0	0	0	0	0	0	0	0	0	0
60	125	Q9SH69|6PGD1_ARATH	188.25	11	0	0	0	0	11	0	0	0	0	0	0	7	0	0	0	0	0	0	0	0	0	0	2	0	11	0	0	0	0	2	0	0	7	0	0	0	5	0	0	0	0	0	0	0	7
49	116	Q9FWA3|6PGD2_ARATH	224.71	12	0	0	0	0	12	0	0	0	0	0	0	8	0	0	0	0	0	0	0	0	0	0	2	0	10	0	0	0	0	2	0	0	4	0	0	0	2	0	0	0	0	0	0	0	8
294	4479	Q02066|AAIP_WHEAT	54.22	5	0	0	0	5	0	0	0	0	0	0	0	0	0	0	0	0	0	0	0	0	0	0	0	0	0	0	0	0	0	0	0	0	0	0	0	0	0	0	0	0	0	0	0	0	0
290	1546	Q9C5C4|ARGE_ARATH	53.29	2	0	0	0	0	0	0	0	0	0	0	0	0	0	0	0	0	0	0	0	0	0	0	0	0	0	0	0	0	0	0	2	0	0	0	0	0	0	0	0	0	0	0	0	0	0
140	200	Q42669|ACOHC_CUCMC	165.66	6	0	0	0	0	0	0	0	0	0	0	0	0	0	0	0	0	2	0	0	0	0	2	0	0	0	0	0	0	0	0	0	4	0	0	0	0	0	0	0	0	0	0	0	0	0
126	73	Q42560|ACO1_ARATH	197	10	0	0	0	0	0	0	0	0	0	0	0	0	0	0	0	0	3	0	1	0	0	2	0	0	0	0	0	0	0	0	0	4	0	0	0	0	0	0	0	0	0	0	0	0	0
304	553	Q94A28|ACO2M_ARATH	52.45	1	0	0	0	0	0	0	0	0	0	0	0	0	0	0	0	0	0	0	0	0	0	0	0	0	0	0	0	0	0	0	0	0	0	0	0	0	0	0	0	0	0	0	0	0	0
100	68	Q9SIB9|ACO3M_ARATH	228.68	10	0	0	0	0	0	0	0	0	0	0	0	0	0	0	0	0	2	0	2	0	0	4	0	0	0	0	0	0	0	0	0	8	0	0	0	0	0	0	0	0	0	0	0	0	0
26	26	P53496|ACT11_ARATH	296.5	37	0	8	14	15	7	22	17	11	8	8	3	11	10	8	0	19	5	14	0	0	15	0	0	8	0	8	0	11	5	8	8	0	5	11	0	0	0	0	8	0	8	5	10	0	8
12	32	P53497|ACT12_ARATH	303.54	37	0	11	14	15	7	22	20	11	10	10	6	11	10	11	0	19	7	14	3	0	15	0	0	8	0	10	0	14	5	8	8	0	7	11	0	0	0	0	8	0	8	5	10	0	10
12	31	P53494|ACT4_ARATH	303.54	37	0	11	14	15	7	22	20	11	10	10	6	11	10	11	0	19	7	14	3	0	15	0	0	8	0	10	0	14	5	8	8	0	7	11	0	0	0	0	8	0	8	5	10	0	10
33	37	P53492|ACT7_ARATH	287.51	38	0	8	11	13	7	16	14	8	8	8	3	11	8	8	0	13	5	15	0	0	12	0	0	8	0	8	0	10	5	8	8	0	5	8	0	0	0	0	8	0	8	5	8	0	8
153	306	Q43199|APT1_WHEAT	164.59	29	0	5	13	0	0	0	0	0	13	0	29	0	0	0	0	0	0	0	0	0	0	0	0	0	0	0	0	0	0	0	0	0	0	0	0	0	0	0	0	0	0	0	0	0	0
5	8	P32112|SAHH_WHEAT	353.76	45	31	0	0	3	7	6	4	0	0	6	2	10	0	0	28	3	0	6	0	0	5	0	31	0	0	0	11	3	0	0	0	0	0	2	0	13	0	0	0	0	0	0	0	0	12
355	5461	Q9FK35|KAD3_ARATH	50.35	3	0	0	0	0	0	0	0	0	0	0	0	0	0	0	0	0	0	0	0	0	3	0	0	0	0	0	0	0	0	0	0	0	0	0	0	0	0	0	0	0	0	0	0	0	0
355	5374	O82514|KAD4_ARATH	50.35	3	0	0	0	0	0	0	0	0	0	0	0	0	0	0	0	0	0	0	0	0	3	0	0	0	0	0	0	0	0	0	0	0	0	0	0	0	0	0	0	0	0	0	0	0	0
117	67	O24396|PURA_WHEAT	223.39	24	0	0	0	0	17	0	3	0	0	0	0	8	0	0	4	0	0	0	0	0	0	0	0	0	12	0	0	0	0	0	2	0	3	0	0	0	4	0	0	0	0	0	0	0	7
262	535	Q6T7E8|PURA_TOBAC	88.67	5	0	0	0	0	2	0	0	0	0	0	0	0	0	0	0	0	0	0	0	0	0	0	0	0	4	0	0	0	0	0	0	0	0	0	0	0	0	0	0	0	0	0	0	0	0
34	86	P31167|ADT1_ARATH	261.82	23	0	0	0	18	0	0	0	0	0	19	0	0	0	0	0	0	0	19	0	0	21	0	0	0	0	16	0	0	0	0	0	0	0	5	0	0	0	0	0	0	0	9	0	0	0
24	55	Q41629|ADT1_WHEAT	296.74	39	0	0	0	27	0	0	0	0	0	36	0	0	0	0	0	0	0	31	0	0	32	0	0	0	0	24	0	0	0	0	0	0	0	6	0	0	0	0	0	0	0	7	0	0	0
199	227	P36397|ARF1_ARATH	149	20	0	0	0	0	0	0	0	0	20	0	0	0	0	0	0	0	0	0	0	0	0	0	0	0	0	0	0	0	0	0	0	0	0	0	0	0	0	0	0	0	0	0	0	0	0
199	225	Q9LQC8|ARF2A_ARATH	149	20	0	0	0	0	0	0	0	0	20	0	0	0	0	0	0	0	0	0	0	0	0	0	0	0	0	0	0	0	0	0	0	0	0	0	0	0	0	0	0	0	0	0	0	0	0
199	224	P0DH91|ARF2B_ARATH	149	20	0	0	0	0	0	0	0	0	20	0	0	0	0	0	0	0	0	0	0	0	0	0	0	0	0	0	0	0	0	0	0	0	0	0	0	0	0	0	0	0	0	0	0	0	0
196	265	Q9LDV4|ALAT2_ARATH	150.48	6	2	0	0	0	2	0	0	0	0	0	0	4	0	0	2	0	0	2	0	0	0	0	2	0	0	0	0	0	0	0	0	0	0	0	0	0	0	0	0	0	0	0	0	0	2
203	3174	Q94AL9|AGT22_ARATH	67.46	2	0	0	0	0	2	0	2	0	0	0	0	2	0	0	0	0	0	0	0	0	0	0	0	0	0	0	0	0	0	0	0	0	0	0	0	0	0	0	0	0	0	0	0	0	2
343	1454	Q84TF0|AKRCA_ARATH	48.13	0	0	0	0	0	0	0	0	0	0	0	0	0	0	0	0	0	0	0	0	0	0	0	0	0	0	0	0	0	0	0	0	0	0	0	0	0	0	0	0	0	0	0	0	0	0
286	1140	Q67XD9|CINV2_ARATH	55.43	2	0	0	0	0	0	0	0	0	0	0	0	2	0	0	0	0	0	0	0	0	0	0	0	0	0	0	0	0	0	0	0	0	0	0	0	0	0	0	0	0	0	0	0	0	2
349	1917	Q96242|CP74A_ARATH	59.7	3	0	0	0	0	3	0	0	0	0	0	0	0	0	0	0	0	0	0	0	0	0	0	0	0	0	0	0	0	0	0	0	0	0	0	0	0	0	0	0	0	0	0	0	0	0
361	2899	Q94AH8|TPS6_ARATH	54.9	1	0	0	0	0	0	0	0	0	0	0	0	0	0	0	0	0	0	0	0	0	0	0	0	0	0	0	0	0	0	0	0	0	0	0	0	0	0	0	0	0	0	0	0	0	0
135	46	Q9LKJ3|PHSH_WHEAT	246.04	17	0	0	0	0	0	0	0	0	0	0	0	0	0	0	0	0	0	0	0	0	0	0	0	9	0	0	0	0	0	0	0	0	0	0	0	0	0	8	0	10	0	0	0	0	0
291	1185	Q8VZH2|APM1_ARATH	63.53	1	0	0	0	0	0	0	0	0	0	0	0	0	0	0	0	0	1	0	0	0	0	0	0	0	0	0	0	0	0	0	0	0	0	0	0	0	0	0	0	0	0	0	0	0	0
365	2728	Q9SAR5|AKR2A_ARATH	52.84	4	0	0	0	0	0	0	0	0	0	0	0	0	0	0	0	0	0	0	0	0	4	0	0	0	0	0	0	0	0	0	0	0	0	0	0	0	0	0	0	0	0	0	0	0	0
365	5437	Q29Q26|AKR2B_ARATH	52.84	3	0	0	0	0	0	0	0	0	0	0	0	0	0	0	0	0	0	0	0	0	3	0	0	0	0	0	0	0	0	0	0	0	0	0	0	0	0	0	0	0	0	0	0	0	0
263	1222	O22715|AP1M2_ARATH	74	2	0	0	0	0	2	0	0	0	0	0	0	2	0	0	0	0	0	0	0	0	0	0	0	0	0	0	0	0	0	0	0	0	0	0	0	0	0	0	0	0	0	0	0	0	2
370	5449	Q9SB50|AP4M_ARATH	49.13	0	0	0	0	0	0	0	0	0	0	0	0	0	0	0	0	0	0	0	0	0	0	0	0	0	0	0	0	0	0	0	0	0	0	0	0	0	0	0	0	0	0	0	0	0	0
318	854	Q9LEU8|ARLY_ARATH	60.33	2	0	0	0	0	0	0	0	0	0	0	0	0	0	0	0	0	0	0	0	0	0	0	0	0	0	0	0	0	0	0	0	0	0	0	0	0	2	0	0	0	0	0	0	0	0
217	267	Q9SZX3|ASSY_ARATH	93.68	3	0	0	0	0	2	0	0	0	0	0	0	3	0	0	0	0	0	0	0	0	0	0	0	0	0	0	0	0	0	0	0	0	0	0	0	0	0	0	0	0	0	0	0	0	2
324	726	Q9SW96|SYNC1_ARATH	54.64	2	0	0	0	0	0	2	0	0	0	0	0	0	0	0	0	0	0	0	0	0	0	0	0	0	0	0	0	0	0	0	0	0	0	0	0	0	0	0	0	0	0	0	0	0	0
324	1606	Q9SSK1|SYNC3_ARATH	54.64	2	0	0	0	0	0	2	0	0	0	0	0	0	0	0	0	0	0	0	0	0	0	0	0	0	0	0	0	0	0	0	0	0	0	0	0	0	0	0	0	0	0	0	0	0	0
205	191	P68538|MI25_WHEAT	100.64	11	0	7	0	0	0	0	0	0	7	0	0	0	0	11	0	0	0	0	0	0	0	0	0	0	0	0	0	0	0	0	0	0	0	0	0	0	0	0	0	0	0	0	0	0	0
67	66	P92549|ATPAM_ARATH	218.9	17	8	4	2	0	0	0	0	0	0	0	0	0	0	2	8	0	0	2	0	0	0	0	12	0	0	0	3	0	0	0	0	0	0	0	0	5	0	0	0	0	0	0	0	0	2
29	7	P12862|ATPAM_WHEAT	304.66	41	23	6	2	0	0	2	2	0	0	0	0	0	0	5	22	2	0	2	0	0	0	0	29	0	0	0	9	2	0	0	0	0	0	0	0	21	0	0	0	0	5	0	0	0	2
58	42	P83483|ATPBM_ARATH	254.58	24	17	0	0	0	0	0	0	0	0	0	0	0	0	0	14	0	0	3	0	0	4	0	20	0	0	0	8	0	0	0	0	0	0	0	0	17	0	0	0	0	0	0	0	0	0
58	43	P83484|ATPBN_ARATH	254.58	24	17	0	0	0	0	0	0	0	0	0	0	0	0	0	14	0	0	3	0	0	4	0	20	0	0	0	8	0	0	0	0	0	0	0	0	17	0	0	0	0	0	0	0	0	0
58	47	Q9C5A9|ATPBO_ARATH	254.58	24	17	0	0	0	0	0	0	0	0	0	0	0	0	0	14	0	0	3	0	0	4	0	20	0	0	0	8	0	0	0	0	0	0	0	0	17	0	0	0	0	0	0	0	0	0
218	337	Q96250|ATPG3_ARATH	112.26	5	0	0	0	0	0	5	0	0	0	0	0	0	0	0	0	2	0	0	0	0	0	0	0	0	0	0	0	2	0	0	0	0	0	0	0	0	0	0	0	0	0	0	0	0	0
158	514	Q9SGY2|ACLA1_ARATH	111.48	4	0	0	0	0	2	0	4	0	0	0	0	2	0	0	0	0	0	0	0	0	0	0	0	0	0	0	0	0	0	0	4	0	2	0	0	0	0	0	0	0	2	0	0	0	4
158	508	O22718|ACLA2_ARATH	111.48	4	0	0	0	0	2	0	4	0	0	0	0	2	0	0	0	0	0	0	0	0	0	0	0	0	0	0	0	0	0	0	4	0	2	0	0	0	0	0	0	0	2	0	0	0	4
158	499	O80526|ACLA3_ARATH	111.48	4	0	0	0	0	2	0	4	0	0	0	0	2	0	0	0	0	0	0	0	0	0	0	0	0	0	0	0	0	0	0	4	0	2	0	0	0	0	0	0	0	2	0	0	0	4
272	286	Q9C522|ACLB1_ARATH	79.94	3	0	0	0	0	0	0	0	0	0	0	0	0	0	0	0	0	0	0	0	0	0	0	0	0	0	0	0	0	3	0	0	0	0	0	0	0	0	0	0	0	0	0	0	0	0
257	288	Q9FGX1|ACLB2_ARATH	75.92	2	0	0	0	0	0	0	0	0	0	0	0	0	0	0	0	0	0	0	0	0	0	0	0	0	0	0	0	0	0	0	0	0	0	0	0	0	0	0	0	0	0	0	2	0	0
137	153	P93594|AMYB_WHEAT	193.75	8	5	0	0	0	0	0	0	0	0	0	0	0	0	0	8	0	0	0	0	0	0	0	0	0	0	0	5	0	0	0	0	0	0	0	0	5	0	0	0	0	0	0	0	0	0
276	507	Q9FIW4|BGL42_ARATH	58.06	2	0	0	0	0	0	0	0	0	0	0	0	0	0	0	0	0	0	0	0	0	0	0	2	0	0	0	0	0	0	0	0	0	0	0	0	0	0	0	0	0	0	0	0	0	0
276	486	Q9LV34|BGL43_ARATH	58.06	2	0	0	0	0	0	0	0	0	0	0	0	0	0	0	0	0	0	0	0	0	0	0	2	0	0	0	0	0	0	0	0	0	0	0	0	0	0	0	0	0	0	0	0	0	0
276	374	Q9LV33|BGL44_ARATH	58.06	2	0	0	0	0	0	0	0	0	0	0	0	0	0	0	0	0	0	0	0	0	0	0	2	0	0	0	0	0	0	0	0	0	0	0	0	0	0	0	0	0	0	0	0	0	0
87	113	P25696|ENO2_ARATH	206.51	22	15	0	0	0	2	0	3	0	0	0	0	0	0	0	17	0	0	0	0	0	0	0	22	0	0	0	5	0	0	0	0	0	3	0	0	5	0	0	0	0	8	0	0	0	8
325	815	Q42479|CDPK3_ARATH	56.89	2	0	0	0	0	0	0	0	0	0	0	0	0	0	0	0	0	0	0	0	0	0	0	2	0	0	0	0	0	0	0	0	0	0	0	0	0	0	0	0	0	0	0	0	0	0
189	1247	Q38858|CALR2_ARATH	117.89	7	0	0	0	0	2	0	0	0	0	0	0	2	0	0	2	0	0	0	0	0	0	0	7	0	0	0	5	0	0	0	0	0	0	0	0	0	0	0	0	0	0	0	0	0	2
300	744	O64817|CSK23_ARATH	52.06	3	0	0	0	0	0	0	0	0	0	0	0	0	0	0	0	3	0	0	0	0	0	0	0	0	0	0	0	0	0	0	0	0	0	0	0	0	0	0	0	0	0	0	0	0	0
301	1146	O64816|CSK2P_ARATH	49.78	0	0	0	0	0	0	0	0	0	0	0	0	0	0	0	0	0	0	0	0	0	0	0	0	0	0	0	0	0	0	0	0	0	0	0	0	0	0	0	0	0	0	0	0	0	0
224	122	P55313|CATA2_WHEAT	130.55	4	0	0	0	0	0	0	0	0	0	0	0	2	0	0	3	0	0	0	0	0	0	0	0	0	0	0	3	0	0	0	0	0	0	0	0	0	0	0	0	0	0	0	0	0	0
306	471	Q9ZPR1|CD48B_ARATH	49.29	0	0	0	0	0	0	0	0	0	0	0	0	0	0	0	0	0	0	0	0	0	0	0	0	0	0	0	0	0	0	0	0	0	0	0	0	0	0	0	0	0	0	0	0	0	0
79	25	Q9SCN8|CD48D_ARATH	271.86	20	0	0	0	0	0	0	0	0	0	0	0	0	0	0	0	0	10	0	5	0	0	7	0	0	0	0	0	0	0	0	0	11	0	0	0	0	0	2	0	0	0	0	0	0	0
81	27	Q9LZF6|CD48E_ARATH	272.62	19	0	0	0	0	0	0	0	0	0	0	0	0	0	0	0	0	10	0	5	0	0	7	0	0	0	0	0	0	0	0	0	11	0	0	0	0	0	2	0	0	0	0	0	0	0
339	1078	Q9SWW6|CESA7_ARATH	56.65	1	0	0	0	0	0	0	0	0	0	0	0	0	0	0	0	0	0	0	0	0	0	0	0	0	0	0	0	0	0	0	0	0	0	0	0	0	0	0	0	0	0	0	0	0	0
216	413	P20115|CISY4_ARATH	120	4	0	0	0	0	0	0	4	0	0	0	0	0	0	0	0	0	0	0	0	0	0	0	0	0	0	0	0	0	0	0	0	0	2	0	0	0	0	0	0	0	2	0	0	0	0
136	167	Q9M1D3|CISY5_ARATH	186.05	12	0	0	0	0	3	0	7	0	0	0	0	0	0	0	0	0	0	0	0	0	0	0	0	0	0	0	0	0	0	0	0	0	7	0	0	0	0	0	0	0	7	0	0	0	0
252	254	Q9SV21|COPB1_ARATH	103.22	3	0	0	0	0	0	0	0	0	0	0	0	0	0	0	0	0	0	0	0	0	0	0	0	0	0	0	0	0	0	0	0	0	1	0	0	0	0	0	0	0	0	0	0	0	1
252	256	Q9SV20|COPB2_ARATH	103.22	3	0	0	0	0	0	0	0	0	0	0	0	0	0	0	0	0	0	0	0	0	0	0	0	0	0	0	0	0	0	0	0	0	1	0	0	0	0	0	0	0	0	0	0	0	1
237	198	Q0WW26|COPG_ARATH	110.72	3	0	0	0	0	0	0	0	0	0	0	0	0	0	0	0	0	1	0	0	0	0	0	0	0	0	0	0	0	0	0	0	1	0	0	0	0	0	0	0	0	0	0	0	0	0
364	2613	Q9LM02|SMT1_ARATH	53.47	4	0	0	0	0	0	0	0	0	0	0	0	0	0	0	0	0	0	0	0	0	0	0	0	0	0	0	0	4	0	0	0	0	0	0	0	0	0	0	0	0	0	0	0	0	0
76	39	P38076|CYSK_WHEAT	281.82	50	0	4	0	0	0	35	0	0	0	0	0	0	0	0	0	46	0	0	0	0	0	0	0	0	0	0	0	23	0	0	0	0	0	0	0	0	0	0	19	0	0	0	0	0	0
142	356	P47999|CYSKP_ARATH	159.43	10	0	3	0	0	0	7	0	0	0	0	0	0	0	0	0	7	0	0	0	0	0	0	0	0	0	0	0	6	0	0	0	0	0	0	0	0	0	0	0	0	0	0	0	0	0
256	2798	P07747|CYB_WHEAT	73.55	2	0	0	0	2	0	0	0	0	0	2	0	0	0	0	0	0	0	2	0	0	2	0	0	0	0	0	0	0	0	0	0	0	0	0	0	0	0	0	0	0	0	0	0	0	0
215	2791	P00413|COX2_WHEAT	88.3	7	0	0	0	7	0	0	0	0	0	0	0	0	0	0	0	0	0	3	0	0	3	0	0	0	0	7	0	0	0	0	0	0	0	0	0	0	0	0	0	0	0	0	0	0	0
157	131	Q9SRZ6|ICDHC_ARATH	163.72	14	0	3	3	0	0	8	5	3	3	0	0	0	0	0	0	5	0	5	0	0	0	0	0	0	0	0	0	4	0	0	0	0	0	0	0	0	0	0	0	0	2	0	0	0	0
348	2043	Q9LT69|SERA3_ARATH	54.8	1	0	0	0	0	0	0	0	0	0	0	0	0	0	0	0	0	0	0	0	0	0	0	0	0	0	0	0	0	0	0	0	0	0	0	0	0	0	0	0	0	0	0	0	0	1
249	677	Q56XG6|RH15_ARATH	58.29	2	0	0	0	2	0	0	0	0	0	0	0	2	0	0	0	0	0	0	0	0	0	0	0	0	0	0	0	0	0	0	0	0	0	0	0	0	0	0	0	0	0	0	0	0	0
249	676	Q9LFN6|RH56_ARATH	58.29	2	0	0	0	2	0	0	0	0	0	0	0	2	0	0	0	0	0	0	0	0	0	0	0	0	0	0	0	0	0	0	0	0	0	0	0	0	0	0	0	0	0	0	0	0	0
235	405	P46524|CO410_WHEAT	78.3	12	0	7	5	0	0	0	0	0	0	0	5	0	0	0	0	0	0	0	0	0	0	0	0	0	0	0	0	0	0	0	0	0	0	0	0	0	0	0	0	0	0	0	5	0	0
278	194	W5DYE3|DMS1A_WHEAT	63.29	3	0	0	0	0	0	3	0	0	0	0	0	0	0	0	0	3	0	0	0	0	0	0	0	0	0	0	0	0	0	0	0	0	0	0	0	0	0	0	0	0	0	0	0	0	0
278	216	A0A1D5XGW0|DMS1B_WHEAT	63.29	3	0	0	0	0	0	3	0	0	0	0	0	0	0	0	0	3	0	0	0	0	0	0	0	0	0	0	0	0	0	0	0	0	0	0	0	0	0	0	0	0	0	0	0	0	0
278	234	A0A1X9QHJ0|DMS1D_WHEAT	63.29	3	0	0	0	0	0	3	0	0	0	0	0	0	0	0	0	3	0	0	0	0	0	0	0	0	0	0	0	0	0	0	0	0	0	0	0	0	0	0	0	0	0	0	0	0	0
333	4382	Q949X7|DCDA1_ARATH	56.46	4	0	0	0	0	0	0	0	0	0	0	0	0	0	0	0	0	0	0	0	0	0	0	0	0	0	0	0	0	0	0	0	0	0	0	0	0	0	0	0	0	0	0	0	0	0
333	2166	Q94A94|DCDA2_ARATH	56.46	4	0	0	0	0	0	0	0	0	0	0	0	0	0	0	0	0	0	0	0	0	0	0	0	0	0	0	0	0	0	0	0	0	0	0	0	0	0	0	0	0	0	0	0	0	0
241	808	Q9LFG2|DAPF_ARATH	61.23	3	0	0	0	0	0	3	0	0	0	0	0	0	0	0	0	3	0	0	0	0	0	0	0	0	0	0	0	3	0	0	0	0	0	0	0	0	0	0	0	0	0	0	0	0	0
173	221	A8MS68|PLPD1_ARATH	131.01	6	3	0	0	0	0	0	0	0	0	0	0	0	0	0	2	0	0	0	0	0	0	0	1	0	0	0	0	0	0	0	0	0	0	0	0	3	4	0	0	0	0	0	0	0	4
173	241	F4JLP5|PLPD2_ARATH	131.01	7	4	0	0	0	0	0	0	0	0	0	0	0	0	0	2	0	0	0	0	0	0	0	1	0	0	0	0	0	0	0	0	0	0	0	0	4	4	0	0	0	0	0	0	0	4
340	3166	Q9C8P0|ODP25_ARATH	49.88	0	0	0	0	0	0	0	0	0	0	0	0	0	0	0	0	0	0	0	0	0	0	0	0	0	0	0	0	0	0	0	0	0	0	0	0	0	0	0	0	0	0	0	0	0	0
245	839	Q9FLQ4|ODO2A_ARATH	58.05	2	0	0	0	0	2	0	0	0	0	0	0	2	0	0	0	0	0	0	0	0	0	0	0	0	0	0	0	0	0	0	2	0	2	0	0	0	0	0	0	0	0	0	0	0	0
245	479	Q8H107|ODO2B_ARATH	58.05	2	0	0	0	0	2	0	0	0	0	0	0	2	0	0	0	0	0	0	0	0	0	0	0	0	0	0	0	0	0	0	2	0	2	0	0	0	0	0	0	0	0	0	0	0	0
3	63	P0DH99|EF1A1_ARATH	325.5	29	3	4	10	14	18	16	16	7	5	17	2	20	7	7	0	8	0	16	0	0	14	0	2	0	17	7	0	5	2	6	6	0	9	12	0	2	9	0	4	0	6	2	9	0	26
3	61	Q8W4H7|EF1A2_ARATH	325.5	29	3	4	10	14	18	16	16	7	5	17	2	20	7	7	0	8	0	16	0	0	14	0	2	0	17	7	0	5	2	6	6	0	9	12	0	2	9	0	4	0	6	2	9	0	26
3	62	Q0WL56|EF1A3_ARATH	325.5	29	3	4	10	14	18	16	16	7	5	17	2	20	7	7	0	8	0	16	0	0	14	0	2	0	17	7	0	5	2	6	6	0	9	12	0	2	9	0	4	0	6	2	9	0	26
3	64	Q8GTY0|EF1A4_ARATH	325.5	29	3	4	10	14	18	16	16	7	5	17	2	20	7	7	0	8	0	16	0	0	14	0	2	0	17	7	0	5	2	6	6	0	9	12	0	2	9	0	4	0	6	2	9	0	26
1	9	Q03033|EF1A_WHEAT	380.8	44	3	7	7	11	31	16	18	7	8	17	2	35	4	7	10	8	3	13	0	0	13	0	10	0	31	7	5	5	2	6	6	5	14	12	0	8	22	0	4	0	6	2	12	0	38
44	138	P29546|EF1B_WHEAT	261.34	36	0	0	0	36	0	0	0	0	0	27	0	0	0	0	0	0	0	27	0	0	36	0	0	0	0	31	0	0	0	0	0	0	0	6	0	0	0	0	0	0	0	10	0	0	0
51	58	Q9ASR1|EF2_ARATH	239.59	13	0	0	0	0	0	3	0	0	0	3	0	1	0	0	1	1	6	0	3	3	0	5	1	0	0	0	0	3	0	0	0	2	1	0	0	1	1	0	0	0	0	0	0	0	4
323	1701	Q9ZT91|EFTM_ARATH	49.76	0	0	0	0	0	0	0	0	0	0	0	0	0	0	0	0	0	0	0	0	0	0	0	0	0	0	0	0	0	0	0	0	0	0	0	0	0	0	0	0	0	0	0	0	0	0
299	195	Q9STX5|ENPL_ARATH	69.98	2	0	0	0	0	0	0	0	0	0	0	0	0	0	0	0	0	0	0	0	0	0	0	0	0	0	0	0	0	0	0	0	0	0	0	0	0	0	2	0	0	0	0	0	0	0
282	379	Q9C9C4|ENO1_ARATH	71.3	4	0	0	0	0	0	0	0	0	0	0	0	0	0	0	4	0	0	0	0	0	0	0	0	0	0	0	4	0	0	0	0	0	0	0	0	0	0	0	0	0	0	0	0	0	0
172	533	Q9SLA8|FABI_ARATH	82.99	3	0	0	0	0	0	3	0	0	0	0	0	0	0	0	0	3	0	0	0	0	0	0	0	0	0	0	0	3	0	0	0	0	0	0	0	0	0	0	0	0	0	0	0	0	0
127	243	Q96327|EBP1_ARATH	149.83	7	0	0	0	0	5	7	2	0	0	0	0	7	0	0	0	5	0	0	0	0	0	0	0	0	0	0	0	5	0	0	0	0	0	0	0	0	0	0	0	0	0	0	0	0	5
4	4	P41378|IF4A_WHEAT	410.02	52	0	0	3	7	47	0	28	0	0	3	3	52	4	0	0	0	0	9	0	0	9	0	0	0	26	7	0	0	0	7	18	2	27	0	2	0	20	0	3	0	12	0	0	0	39
166	353	Q94A52|RH2_ARATH	116.99	5	0	0	0	0	2	0	3	0	0	0	0	2	0	0	0	0	0	0	0	0	0	0	0	0	0	0	0	0	0	0	0	0	2	0	0	0	2	0	0	0	0	0	0	0	2
254	393	Q39097|ERF1X_ARATH	107.16	6	0	0	0	0	0	0	0	0	0	0	0	3	0	0	0	0	0	0	0	0	0	0	0	0	0	0	0	0	0	0	0	0	0	0	0	0	3	0	0	0	0	0	0	0	3
220	385	O24473|IF2B_WHEAT	89.53	7	0	0	0	0	0	3	0	4	4	0	0	0	0	4	0	4	0	0	0	0	0	0	0	0	0	0	0	0	0	0	0	0	0	0	0	0	0	0	0	0	0	0	4	0	0
228	495	Q38884|EIF3I_ARATH	72.78	3	0	0	0	3	0	0	0	0	0	3	0	0	0	0	0	0	0	3	0	0	3	0	0	0	0	0	0	0	0	0	0	0	0	0	0	0	0	0	0	0	0	0	0	0	0
192	1532	Q9SZA3|EIF3K_ARATH	73.47	4	0	0	0	0	0	0	0	4	0	0	0	0	4	0	0	0	0	0	0	0	0	0	0	0	0	0	0	0	4	0	0	0	0	4	0	0	0	0	0	0	0	0	4	0	0
180	333	P29557|IF4E1_WHEAT	136.3	12	0	6	6	0	0	0	0	6	6	0	12	0	0	6	0	0	0	0	0	0	0	0	0	0	0	0	0	0	0	0	0	0	0	6	0	0	0	0	0	0	0	0	0	0	0
171	245	Q03389|IF4E2_WHEAT	158.92	17	0	0	0	17	0	0	0	7	0	7	0	0	0	0	0	0	0	11	0	0	11	0	0	0	0	0	0	0	0	0	0	0	0	7	0	0	0	0	0	0	0	0	0	0	0
160	85	Q03387|IF4G1_WHEAT	179.4	7	0	1	0	0	0	1	0	1	0	0	1	0	0	0	0	0	0	0	0	0	1	0	0	0	0	0	0	1	0	0	1	0	0	0	0	0	0	0	0	0	0	0	0	0	0
303	456	O82491|SPT16_ARATH	51.79	1	0	0	0	0	0	0	0	0	0	0	0	0	0	0	0	0	0	0	0	0	0	0	0	0	0	0	0	0	0	0	0	0	0	0	0	0	0	0	0	0	1	0	0	0	0
229	334	Q9S9P8|FNRR2_ARATH	87.5	6	0	0	0	0	0	6	0	0	0	0	0	0	0	0	0	2	0	0	0	0	0	0	0	0	0	0	0	2	0	0	0	0	0	0	0	0	0	0	0	0	0	0	0	0	0
359	2573	Q9LYN2|FRI3_ARATH	49.97	0	0	0	0	0	0	0	0	0	0	0	0	0	0	0	0	0	0	0	0	0	0	0	0	0	0	0	0	0	0	0	0	0	0	0	0	0	0	0	0	0	0	0	0	0	0
115	201	Q9LF98|ALFC8_ARATH	201.06	11	0	0	0	0	0	9	0	0	0	0	0	0	0	0	0	11	0	0	0	0	4	0	0	0	0	0	0	7	0	0	0	0	0	0	0	0	0	0	4	0	0	0	0	0	4
168	213	P93033|FUM1_ARATH	145.56	5	0	0	0	0	5	0	0	0	0	0	0	5	0	0	0	0	0	0	0	0	0	0	0	0	0	0	0	0	0	0	0	0	0	0	0	0	0	0	0	0	0	0	0	0	5
194	244	Q9FI53|FUM2_ARATH	140.45	4	0	0	0	0	4	0	0	0	0	0	0	2	0	0	0	0	0	0	0	0	0	0	0	0	0	0	0	0	0	0	0	0	0	0	0	0	0	0	0	0	0	0	0	0	4
226	230	Q93VR3|GME_ARATH	109.34	8	0	0	0	0	6	0	5	0	0	0	0	2	0	0	0	0	0	0	0	0	0	0	0	0	0	0	0	0	0	0	0	0	0	0	0	0	0	0	0	0	0	0	0	0	0
255	1113	Q9SNY3|GMD1_ARATH	71.3	2	0	0	0	0	0	0	2	0	0	0	0	0	0	0	0	0	0	0	0	0	0	0	0	0	0	0	0	0	0	0	0	0	2	0	0	0	0	0	0	0	0	0	0	0	0
255	1420	P93031|GMD2_ARATH	71.3	2	0	0	0	0	0	0	2	0	0	0	0	0	0	0	0	0	0	0	0	0	0	0	0	0	0	0	0	0	0	0	0	0	2	0	0	0	0	0	0	0	0	0	0	0	0
338	893	P55228|GLGS_ARATH	52.94	2	0	0	0	0	0	0	0	0	0	0	0	2	0	0	0	0	0	0	0	0	0	0	0	0	0	0	0	0	0	0	0	0	0	0	0	0	0	0	0	0	0	0	0	0	0
338	425	P30523|GLGS_WHEAT	52.94	2	0	0	0	0	0	0	0	0	0	0	0	2	0	0	0	0	0	0	0	0	0	0	0	0	0	0	0	0	0	0	0	0	0	0	0	0	0	0	0	0	0	0	0	0	0
185	180	Q9ZPS3|DCE4_ARATH	130.17	12	0	0	0	0	0	0	0	0	0	0	0	0	0	0	6	0	0	0	0	0	0	0	5	0	2	0	3	0	0	0	0	0	0	0	0	3	0	0	0	0	0	0	0	0	3
316	634	P46309|GSH1_ARATH	56.88	2	0	0	0	0	2	0	0	0	0	0	0	0	0	0	0	0	0	0	0	0	0	0	0	0	0	0	0	0	0	0	0	0	0	0	0	0	0	0	0	0	0	0	0	0	0
316	1920	O23736|GSH1_BRAJU	56.88	2	0	0	0	0	2	0	0	0	0	0	0	0	0	0	0	0	0	0	0	0	0	0	0	0	0	0	0	0	0	0	0	0	0	0	0	0	0	0	0	0	0	0	0	0	0
289	643	Q9LR30|GGT1_ARATH	77.35	4	0	0	0	0	4	0	0	0	0	0	0	4	0	0	0	0	0	0	0	0	0	0	0	0	0	0	0	0	0	0	0	0	0	0	0	0	0	0	0	0	0	0	0	0	0
289	531	Q9S7E9|GGT2_ARATH	77.35	4	0	0	0	0	4	0	0	0	0	0	0	4	0	0	0	0	0	0	0	0	0	0	0	0	0	0	0	0	0	0	0	0	0	0	0	0	0	0	0	0	0	0	0	0	0
227	1076	Q9FRL8|DHAR2_ARATH	49.89	0	0	0	0	0	0	0	0	0	0	0	0	0	0	0	0	0	0	0	0	0	0	0	0	0	0	0	0	0	0	0	0	0	0	0	0	0	0	0	0	0	0	0	0	0	0
351	1582	P46422|GSTF2_ARATH	51.01	4	0	0	0	0	0	0	0	4	0	0	0	0	0	0	0	0	0	0	0	0	0	0	0	0	0	0	0	0	0	0	0	0	0	0	0	0	0	0	0	0	0	0	0	0	0
351	2524	Q9SLM6|GSTF3_ARATH	51.01	4	0	0	0	0	0	0	0	4	0	0	0	0	0	0	0	0	0	0	0	0	0	0	0	0	0	0	0	0	0	0	0	0	0	0	0	0	0	0	0	0	0	0	0	0	0
351	4891	Q96266|GSTF8_ARATH	51.01	3	0	0	0	0	0	0	0	3	0	0	0	0	0	0	0	0	0	0	0	0	0	0	0	0	0	0	0	0	0	0	0	0	0	0	0	0	0	0	0	0	0	0	0	0	0
321	2715	Q9ZW27|GSTU4_ARATH	48.85	0	0	0	0	0	0	0	0	0	0	0	0	0	0	0	0	0	0	0	0	0	0	0	0	0	0	0	0	0	0	0	0	0	0	0	0	0	0	0	0	0	0	0	0	0	0
54	162	P25858|G3PC1_ARATH	195.26	20	0	17	4	9	6	11	4	4	9	9	9	0	14	4	0	17	0	11	0	0	9	4	0	0	0	9	0	11	4	0	0	0	0	13	0	0	0	0	9	0	0	0	4	0	0
54	141	Q9FX54|G3PC2_ARATH	195.26	20	0	17	4	9	6	11	4	4	9	9	9	0	14	4	0	17	0	11	0	0	9	4	0	0	0	9	0	11	4	0	0	0	0	13	0	0	0	0	9	0	0	0	4	0	0
232	527	Q9SAJ6|G3PP1_ARATH	52.94	2	0	0	0	0	0	0	0	0	0	0	0	0	0	0	0	0	0	0	0	0	0	0	0	0	0	2	0	2	0	0	0	0	0	0	0	0	0	0	0	0	0	0	0	0	0
232	503	Q5E924|G3PP2_ARATH	52.94	2	0	0	0	0	0	0	0	0	0	0	0	0	0	0	0	0	0	0	0	0	0	0	0	0	0	2	0	2	0	0	0	0	0	0	0	0	0	0	0	0	0	0	0	0	0
259	340	Q94B78|GCSP1_ARATH	83.41	1	0	0	0	0	0	0	0	0	0	0	0	0	0	0	0	0	0	0	0	0	0	1	0	0	0	0	0	0	0	0	0	0	0	0	0	0	0	0	0	0	0	0	0	0	0
350	5356	O22797|GLTP1_ARATH	49.14	0	0	0	0	0	0	0	0	0	0	0	0	0	0	0	0	0	0	0	0	0	0	0	0	0	0	0	0	0	0	0	0	0	0	0	0	0	0	0	0	0	0	0	0	0	0
187	452	Q9LTR9|NMT1_ARATH	101.51	5	0	0	0	0	3	0	5	3	0	0	0	0	0	0	0	0	0	0	0	0	0	0	0	0	0	0	0	0	0	0	3	0	3	0	0	0	0	0	0	0	3	0	0	0	0
13	157	P41916|RAN1_ARATH	254.97	36	0	14	13	27	0	0	0	22	19	27	5	0	21	12	0	0	0	27	0	0	35	0	0	0	0	20	0	0	15	0	0	0	0	28	0	0	0	0	0	0	0	15	21	0	0
13	158	P41917|RAN2_ARATH	254.97	36	0	14	13	27	0	0	0	22	19	27	5	0	21	12	0	0	0	27	0	0	35	0	0	0	0	20	0	0	15	0	0	0	0	28	0	0	0	0	0	0	0	15	21	0	0
13	159	Q8H156|RAN3_ARATH	254.97	36	0	14	13	27	0	0	0	22	19	27	5	0	21	12	0	0	0	27	0	0	35	0	0	0	0	20	0	0	15	0	0	0	0	28	0	0	0	0	0	0	0	15	21	0	0
202	295	O04834|SAR1A_ARATH	134.57	13	0	6	0	0	0	0	0	0	0	0	13	0	0	6	0	0	0	0	0	0	0	0	0	0	0	0	0	0	0	0	0	0	0	0	0	0	0	0	0	0	0	0	0	0	0
243	874	O24653|GDI2_ARATH	83.63	2	0	0	0	0	0	0	0	0	0	0	0	2	0	0	0	0	0	0	0	0	0	0	0	0	0	0	0	0	0	0	0	0	0	0	0	0	0	0	0	0	0	0	0	0	2
267	299	Q9LXC0|GDI_ARATH	99.67	7	0	0	0	0	0	0	0	0	0	0	0	0	0	0	0	0	0	0	0	0	0	0	0	0	7	0	0	0	0	0	0	0	0	0	0	0	3	0	0	0	0	0	0	0	0
14	6	P22953|HS701_ARATH	312.12	29	0	2	5	12	9	0	6	7	7	11	9	7	7	6	0	2	0	11	0	23	12	0	0	20	2	5	0	0	2	2	0	0	5	8	12	0	0	16	0	5	3	2	2	0	4
129	135	Q9S7C0|HSP7O_ARATH	180.05	6	0	0	0	0	0	0	0	0	0	0	0	0	0	0	0	0	6	0	1	0	0	6	0	0	0	0	0	0	0	0	0	3	0	0	0	0	0	0	0	0	0	0	0	0	0
129	134	F4HQD4|HSP7P_ARATH	180.05	6	0	0	0	0	0	0	0	0	0	0	0	0	0	0	0	0	6	0	1	0	0	6	0	0	0	0	0	0	0	0	0	3	0	0	0	0	0	0	0	0	0	0	0	0	0
27	21	Q9C7X7|HSP7N_ARATH	291.94	25	0	2	5	13	7	0	4	7	8	11	10	5	8	6	4	3	0	11	0	23	13	0	0	17	3	5	0	0	2	3	0	0	3	9	13	0	0	16	0	5	3	2	2	0	1
20	5	P22954|HS702_ARATH	305.59	32	0	2	5	14	7	0	4	7	7	11	9	4	7	6	4	2	0	11	0	24	12	0	0	18	2	5	0	0	2	2	0	0	2	8	14	0	0	18	0	5	3	2	2	0	1
21	11	O65719|HSP7C_ARATH	278.51	29	0	2	5	12	5	0	4	7	7	13	9	4	7	6	4	2	0	11	0	23	15	0	0	22	2	5	0	0	2	2	0	0	2	11	13	0	0	19	0	7	5	2	4	0	1
19	10	Q9LHA8|HS704_ARATH	306.8	26	0	2	5	14	7	0	4	7	7	11	9	4	7	6	4	2	0	11	0	25	12	0	0	18	2	5	0	0	2	2	0	0	2	8	16	0	0	15	0	5	3	2	2	0	1
53	98	Q9S9N1|HSP7E_ARATH	233.7	14	0	2	5	10	5	0	2	5	7	7	7	2	7	2	0	2	0	7	0	11	7	0	0	7	2	5	0	0	0	2	0	0	2	5	7	0	0	5	0	3	3	0	0	0	0
193	143	Q9LTX9|HSP7G_ARATH	123.8	6	0	0	0	0	0	0	0	0	0	0	0	0	0	0	0	0	0	0	0	2	0	0	0	4	0	0	0	0	0	0	0	0	0	0	2	0	0	4	0	4	0	0	0	0	0
52	49	Q39043|BIP2_ARATH	252.01	14	0	0	2	6	2	0	8	3	3	6	2	0	4	0	0	0	0	4	0	6	5	0	0	7	2	4	0	0	0	4	0	0	4	3	6	0	0	8	0	3	6	0	3	0	0
128	78	P27323|HS901_ARATH	212.02	15	0	0	0	2	0	0	0	0	0	0	0	1	0	0	0	1	0	0	0	5	0	0	0	9	0	0	0	0	0	0	0	0	0	0	0	0	0	7	0	2	0	0	2	0	1
56	41	P55737|HS902_ARATH	275.46	25	2	0	0	2	2	0	0	0	0	0	0	3	0	0	0	1	2	0	0	12	0	0	0	19	0	0	0	0	0	0	0	0	0	0	3	0	0	14	2	7	0	0	2	0	5
57	38	O03986|HS904_ARATH	271.23	26	2	0	0	2	2	0	0	0	0	0	0	3	0	0	0	1	2	0	0	12	0	0	0	17	0	0	0	0	0	0	0	0	0	0	3	0	0	17	2	7	0	0	2	0	5
298	496	Q9SIF2|HS905_ARATH	51.66	2	0	0	0	0	0	0	0	0	0	0	0	0	0	0	0	0	0	0	0	0	0	0	0	0	0	0	0	0	0	0	0	0	0	0	0	0	0	2	0	0	0	0	0	0	0
298	321	F4JFN3|HS906_ARATH	51.66	2	0	0	0	0	0	0	0	0	0	0	0	0	0	0	0	0	0	0	0	0	0	0	0	0	0	0	0	0	0	0	0	0	0	0	0	0	0	2	0	0	0	0	0	0	0
319	759	Q9C5U8|HIS8_ARATH	67.6	3	0	0	0	0	3	0	0	0	0	0	0	0	0	0	0	0	0	0	0	0	0	0	0	0	0	0	0	0	0	0	0	0	0	0	0	0	0	0	0	0	0	0	0	0	0
156	229	Q9LQQ4|H2B1_ARATH	145.72	20	0	7	7	0	0	0	0	0	14	0	14	0	7	7	0	0	0	7	0	0	0	0	0	0	0	0	0	0	0	0	0	0	0	0	0	0	0	0	0	0	0	0	0	0	0
156	223	P27807|H2B1_WHEAT	145.72	20	0	7	7	0	0	0	0	0	14	0	14	0	7	7	0	0	0	7	0	0	0	0	0	0	0	0	0	0	0	0	0	0	0	0	0	0	0	0	0	0	0	0	0	0	0
156	296	Q9FFC0|H2B10_ARATH	145.72	21	0	8	8	0	0	0	0	0	14	0	14	0	8	8	0	0	0	7	0	0	0	0	0	0	0	0	0	0	0	0	0	0	0	0	0	0	0	0	0	0	0	0	0	0	0
156	300	P40283|H2B11_ARATH	145.72	20	0	7	7	0	0	0	0	0	14	0	14	0	7	7	0	0	0	7	0	0	0	0	0	0	0	0	0	0	0	0	0	0	0	0	0	0	0	0	0	0	0	0	0	0	0
156	203	P05621|H2B2_WHEAT	145.72	20	0	7	7	0	0	0	0	0	14	0	14	0	7	7	0	0	0	7	0	0	0	0	0	0	0	0	0	0	0	0	0	0	0	0	0	0	0	0	0	0	0	0	0	0	0
156	278	Q9SI96|H2B3_ARATH	145.72	20	0	7	7	0	0	0	0	0	14	0	14	0	7	7	0	0	0	7	0	0	0	0	0	0	0	0	0	0	0	0	0	0	0	0	0	0	0	0	0	0	0	0	0	0	0
156	240	Q43217|H2B3_WHEAT	145.72	22	0	8	8	0	0	0	0	0	15	0	15	0	8	8	0	0	0	7	0	0	0	0	0	0	0	0	0	0	0	0	0	0	0	0	0	0	0	0	0	0	0	0	0	0	0
156	284	Q43215|H2B4_WHEAT	145.72	22	0	8	8	0	0	0	0	0	16	0	16	0	8	8	0	0	0	7	0	0	0	0	0	0	0	0	0	0	0	0	0	0	0	0	0	0	0	0	0	0	0	0	0	0	0
156	196	Q43216|H2B5_WHEAT	145.72	22	0	8	8	0	0	0	0	0	15	0	15	0	8	8	0	0	0	7	0	0	0	0	0	0	0	0	0	0	0	0	0	0	0	0	0	0	0	0	0	0	0	0	0	0	0
156	313	O23629|H2B6_ARATH	145.72	20	0	7	7	0	0	0	0	0	14	0	14	0	7	7	0	0	0	7	0	0	0	0	0	0	0	0	0	0	0	0	0	0	0	0	0	0	0	0	0	0	0	0	0	0	0
156	273	Q9LZT0|H2B7_ARATH	145.72	21	0	8	8	0	0	0	0	0	14	0	14	0	8	8	0	0	0	7	0	0	0	0	0	0	0	0	0	0	0	0	0	0	0	0	0	0	0	0	0	0	0	0	0	0	0
102	297	P59259|H4_ARATH	139.66	31	0	19	19	12	12	0	12	10	19	10	10	0	10	19	0	21	0	21	0	0	0	0	0	0	0	0	0	21	0	0	0	0	0	0	0	0	0	0	0	0	0	0	10	0	12
102	298	P62785|H41_WHEAT	139.66	31	0	19	19	12	12	0	12	10	19	10	10	0	10	19	0	21	0	21	0	0	0	0	0	0	0	0	0	21	0	0	0	0	0	0	0	0	0	0	0	0	0	0	10	0	12
102	293	P62786|H42_WHEAT	139.66	31	0	19	19	12	12	0	12	10	19	10	10	0	10	19	0	21	0	21	0	0	0	0	0	0	0	0	0	21	0	0	0	0	0	0	0	0	0	0	0	0	0	0	10	0	12
281	806	P54873|HMCS_ARATH	63.38	2	0	0	0	0	2	0	0	0	0	0	0	0	0	0	0	0	0	0	0	0	0	0	0	0	0	0	0	0	0	0	0	0	0	0	0	0	0	0	0	0	0	0	0	0	2
293	1214	Q05758|ILV5_ARATH	60.23	3	0	0	0	0	0	0	0	0	0	0	0	0	0	0	0	0	0	0	0	0	0	0	3	0	0	0	0	0	0	0	0	0	0	0	0	0	0	0	0	0	0	0	0	0	0
309	1361	Q07970|KN14C_ARATH	48.56	0	0	0	0	0	0	0	0	0	0	0	0	0	0	0	0	0	0	0	0	0	0	0	0	0	0	0	0	0	0	0	0	0	0	0	0	0	0	0	0	0	0	0	0	0	0
90	612	Q05431|APX1_ARATH	89.3	4	0	4	4	4	0	0	0	4	4	4	4	0	4	4	0	0	0	4	0	0	4	0	0	0	0	0	0	0	0	0	0	0	0	4	0	0	0	0	0	0	0	0	4	0	0
91	422	Q1PER6|APX2_ARATH	88.19	4	0	0	4	4	0	0	0	4	4	4	0	0	4	4	0	0	0	4	0	0	4	0	0	0	0	0	0	0	4	0	0	0	0	4	0	0	0	0	0	0	0	4	4	0	0
116	627	Q42564|APX3_ARATH	91.83	3	0	3	0	3	0	0	0	3	0	3	0	0	3	0	0	0	0	3	0	0	3	0	0	0	0	0	0	0	0	0	0	0	0	3	0	0	0	0	0	0	0	3	3	0	0
116	1633	Q7XZP5|APX5_ARATH	91.83	3	0	3	0	3	0	0	0	3	0	3	0	0	3	0	0	0	0	3	0	0	3	0	0	0	0	0	0	0	0	0	0	0	0	3	0	0	0	0	0	0	0	3	3	0	0
253	646	Q42592|APXS_ARATH	91.74	2	0	0	0	2	0	0	0	0	0	2	0	0	0	0	0	0	0	0	0	0	2	0	0	0	0	0	0	0	0	0	0	0	0	0	0	0	0	0	0	0	0	0	0	0	0
253	445	Q42593|APXT_ARATH	91.74	2	0	0	0	2	0	0	0	0	0	2	0	0	0	0	0	0	0	0	0	0	2	0	0	0	0	0	0	0	0	0	0	0	0	0	0	0	0	0	0	0	0	0	0	0	0
274	251	P30184|AMPL1_ARATH	86.53	3	0	0	0	0	0	0	0	0	0	0	0	0	0	0	0	0	0	0	0	0	0	0	0	0	0	0	0	0	0	0	0	0	0	0	0	3	0	0	0	0	0	0	0	0	0
274	317	Q944P7|AMPL2_ARATH	86.53	3	0	0	0	0	0	0	0	0	0	0	0	0	0	0	0	0	0	0	0	0	0	0	0	0	0	0	0	0	0	0	0	0	0	0	0	3	0	0	0	0	0	0	0	0	0
120	154	P93819|MDHC1_ARATH	177.33	14	0	0	0	2	0	10	0	0	0	0	3	0	0	0	0	10	0	0	0	0	0	0	0	0	0	0	0	11	0	0	0	0	0	0	0	0	0	0	8	0	0	0	0	0	0
125	152	Q9ZP06|MDHM1_ARATH	214.12	19	0	0	0	0	0	11	0	0	0	0	0	0	0	0	0	16	0	0	0	0	0	0	0	0	0	0	0	4	0	0	0	0	0	0	0	0	0	0	7	0	0	0	0	0	0
250	448	O82399|MDHX1_ARATH	99.73	7	0	0	0	0	0	3	0	0	0	0	0	0	0	0	0	0	0	0	0	0	0	0	0	0	0	0	0	3	0	0	0	0	0	0	0	0	0	0	0	0	0	0	0	0	0
200	252	Q9SN86|MDHP_ARATH	153.77	7	0	0	0	0	0	7	0	0	0	0	0	0	0	0	0	7	0	0	0	0	0	0	0	0	0	0	0	4	0	0	0	0	0	0	0	0	0	0	7	0	0	0	0	0	0
275	812	Q9LTB2|MMT1_ARATH	60.41	1	0	0	0	0	0	0	0	0	0	0	0	0	0	0	0	0	1	0	0	0	0	1	0	0	0	0	0	0	0	0	0	0	0	0	0	0	0	0	0	0	0	0	0	0	0
368	4489	Q9C5M0|DTC_ARATH	58.92	4	0	0	0	0	0	0	0	0	0	0	0	0	0	0	0	0	0	0	0	0	4	0	0	0	0	0	0	0	0	0	0	0	0	0	0	0	0	0	0	0	0	0	0	0	0
94	94	P46274|VDAC1_WHEAT	221.35	28	0	0	0	19	0	0	0	4	0	23	0	0	0	0	0	0	0	19	0	0	15	0	0	0	0	25	0	0	0	0	0	0	0	8	0	0	0	0	0	0	0	4	11	0	0
208	911	Q9FJX3|VDAC2_ARATH	83.05	4	0	0	0	4	0	0	0	0	0	4	0	0	0	0	0	0	0	4	0	0	4	0	0	0	0	4	0	0	0	0	0	0	0	0	0	0	0	0	0	0	0	4	0	0	0
201	420	Q9M2Z8|MPCP2_ARATH	102.96	5	0	0	0	2	0	2	0	0	0	0	0	0	0	0	0	2	0	2	0	0	0	0	0	0	0	0	0	2	0	0	0	0	0	0	0	0	0	0	0	0	0	0	0	0	0
265	331	Q39026|MPK6_ARATH	98.99	6	0	0	0	0	0	0	3	0	0	0	0	0	0	0	0	0	0	0	0	0	0	0	0	0	0	0	0	0	0	2	0	0	0	0	0	0	0	0	0	0	0	0	0	0	0
358	2237	Q9FHI1|MOB1A_ARATH	55.52	4	0	4	0	0	0	0	0	0	0	0	0	0	0	0	0	0	0	0	0	0	0	0	0	0	0	0	0	0	0	0	0	0	0	0	0	0	0	0	0	0	0	0	0	0	0
358	2236	Q8GYX0|MOB1B_ARATH	55.52	4	0	4	0	0	0	0	0	0	0	0	0	0	0	0	0	0	0	0	0	0	0	0	0	0	0	0	0	0	0	0	0	0	0	0	0	0	0	0	0	0	0	0	0	0	0
152	395	Q95748|NDUS3_ARATH	126.96	12	0	12	12	0	0	0	0	0	5	0	12	0	0	12	0	0	0	0	0	0	0	0	0	0	0	0	0	0	0	0	0	0	0	0	0	0	0	0	0	0	0	0	0	0	0
88	366	Q9LHG9|NACA1_ARATH	176.82	15	0	15	15	15	0	0	0	15	15	15	15	0	7	15	0	0	0	15	0	0	15	0	0	0	0	15	0	0	15	0	0	0	0	15	0	0	0	0	0	0	0	7	7	0	0
88	363	Q6ICZ8|NACA3_ARATH	176.82	15	0	15	15	15	0	0	0	15	15	15	15	0	7	15	0	0	0	15	0	0	15	0	0	0	0	15	0	0	15	0	0	0	0	15	0	0	0	0	0	0	0	7	7	0	0
352	2675	Q9SZY1|NACA4_ARATH	50.58	7	0	0	0	7	0	0	0	0	0	0	0	0	0	0	0	0	0	0	0	0	0	0	0	0	0	0	0	0	0	0	0	0	0	0	0	0	0	0	0	0	0	0	0	0	0
190	649	Q8VYF5|NILP1_ARATH	128.9	8	0	0	0	0	0	4	0	0	0	0	0	0	0	0	0	8	0	0	0	0	0	0	0	0	0	0	0	4	0	0	0	0	0	0	0	0	0	0	4	0	0	0	0	0	0
366	3605	O65041|UBA3_ARATH	54.47	2	0	0	0	0	2	0	0	0	0	0	0	0	0	0	0	0	0	0	0	0	0	0	0	0	0	0	0	0	0	0	0	0	0	0	0	0	0	0	0	0	0	0	0	0	0
242	848	Q9SA73|OLA1_ARATH	107.27	6	0	0	0	0	0	0	4	0	0	0	0	0	0	0	0	0	0	0	0	0	0	0	0	0	0	0	0	0	0	0	0	0	0	0	0	0	0	0	0	0	3	0	0	0	0
184	133	P93596|CP51_WHEAT	145.7	12	0	0	0	0	0	0	0	0	0	0	0	6	0	0	3	0	0	0	0	0	0	0	4	0	3	0	0	0	0	0	0	0	0	0	0	3	0	0	0	0	0	0	0	0	6
327	1145	O50039|OTC_ARATH	50.24	2	0	0	0	0	0	2	0	0	0	0	0	0	0	0	0	0	0	0	0	0	0	0	0	0	0	0	0	0	0	0	0	0	0	0	0	0	0	0	0	0	0	0	0	0	0
221	573	Q9LPT6|OTU2_ARATH	72.73	5	0	0	0	0	0	0	0	5	0	0	0	0	5	0	0	0	0	0	0	0	0	0	0	0	0	0	0	0	5	0	0	0	0	5	0	0	0	0	0	0	0	0	5	0	0
121	217	P26759|GER3_WHEAT	158.22	23	0	4	8	0	0	0	0	11	8	0	8	0	8	0	0	0	0	0	0	0	0	0	0	0	0	0	0	0	4	0	0	0	0	16	0	0	0	0	0	0	0	0	4	0	0
310	424	Q9LZM1|ORP3A_ARATH	58.49	2	0	0	0	0	0	0	0	0	0	0	0	0	0	0	0	0	0	0	0	0	0	0	0	0	0	0	0	0	0	0	0	0	0	0	0	0	0	0	0	0	0	0	0	0	2
310	324	Q9SR33|ORP3B_ARATH	58.49	2	0	0	0	0	0	0	0	0	0	0	0	0	0	0	0	0	0	0	0	0	0	0	0	0	0	0	0	0	0	0	0	0	0	0	0	0	0	0	0	0	0	0	0	0	2
149	2773	P15984|PERX_WHEAT	135.92	21	0	0	0	21	0	0	0	0	0	21	0	0	0	0	0	0	0	21	0	0	21	0	0	0	0	21	0	21	0	0	0	0	0	0	0	0	0	0	0	0	0	21	0	0	0
25	71	Q05855|PER1_WHEAT	311.61	49	0	0	4	49	0	0	0	0	0	43	0	0	6	0	0	0	0	43	0	0	43	0	0	0	0	45	0	10	0	0	0	0	0	0	0	0	0	0	0	0	0	18	0	0	0
163	183	Q9SLK0|ICDHX_ARATH	163.36	11	0	3	3	0	0	5	5	3	3	0	0	0	0	0	0	2	0	2	0	0	0	0	0	0	0	0	0	0	0	0	0	0	0	0	0	0	0	0	0	0	6	0	0	0	0
277	1031	Q9C8L4|ETHE1_ARATH	48.1	0	0	0	0	0	0	0	0	0	0	0	0	0	0	0	0	0	0	0	0	0	0	0	0	0	0	0	0	0	0	0	0	0	0	0	0	0	0	0	0	0	0	0	0	0	0
124	228	P35510|PAL1_ARATH	155.36	6	0	0	0	0	0	0	0	0	0	0	0	0	0	0	0	0	0	0	0	6	0	0	0	6	0	0	0	0	0	0	0	0	0	0	6	0	0	6	0	0	0	0	0	0	0
106	142	Q9SS45|PAL4_ARATH	196.3	7	0	0	0	0	0	0	0	0	0	0	0	0	0	0	0	0	0	0	0	7	0	0	0	6	0	0	0	0	0	0	0	0	0	0	5	0	0	5	0	1	0	0	0	0	0
124	168	Q43210|PALY_WHEAT	155.36	6	0	0	0	0	0	0	0	0	0	0	0	0	0	0	0	0	0	0	0	6	0	0	0	6	0	0	0	0	0	0	0	0	0	0	6	0	0	6	0	0	0	0	0	0	0
307	609	P29976|AROF_ARATH	53.86	2	0	0	0	0	0	0	0	0	0	0	0	0	0	0	0	0	0	0	0	0	0	0	0	0	0	0	0	0	0	0	0	0	0	0	0	0	0	0	0	0	0	0	0	0	2
307	400	Q00218|AROG_ARATH	53.86	2	0	0	0	0	0	0	0	0	0	0	0	0	0	0	0	0	0	0	0	0	0	0	0	0	0	0	0	0	0	0	0	0	0	0	0	0	0	0	0	0	0	0	0	0	2
59	29	Q9MAH0|CAPP1_ARATH	265.54	17	0	0	0	0	0	0	0	0	0	0	0	0	0	0	0	0	13	0	5	0	0	10	0	0	0	0	0	0	0	0	0	3	0	0	0	0	0	0	0	0	0	0	0	0	0
71	33	Q5GM68|CAPP2_ARATH	266.39	17	0	0	0	0	0	0	0	0	0	0	0	0	0	0	0	0	13	0	5	0	0	4	0	0	0	0	0	0	0	0	0	6	0	0	0	0	0	0	0	0	0	0	0	0	0
287	403	Q9SSQ9|PLDA2_ARATH	63.98	2	0	0	0	0	0	0	0	0	0	0	0	0	0	0	0	0	0	0	0	0	0	0	0	2	0	0	0	0	0	0	0	0	0	0	2	0	0	0	0	0	0	0	0	0	0
96	115	Q1W374|PMM_WHEAT	224.73	23	0	0	0	0	0	0	0	16	0	0	0	0	11	0	0	0	0	0	0	0	4	0	0	0	0	0	0	0	0	0	0	0	0	23	0	0	0	0	0	0	0	0	16	0	0
347	1476	Q05728|PUR5_ARATH	49.37	0	0	0	0	0	0	0	0	0	0	0	0	0	0	0	0	0	0	0	0	0	0	0	0	0	0	0	0	0	0	0	0	0	0	0	0	0	0	0	0	0	0	0	0	0	0
344	427	Q9SX52|FYPP1_ARATH	53.06	5	0	0	0	0	0	0	0	0	0	0	0	0	0	0	0	0	0	0	0	0	0	0	0	0	0	0	0	5	0	0	0	0	0	0	0	0	0	0	0	0	0	0	0	0	0
344	428	Q9LHE7|FYPP3_ARATH	53.06	5	0	0	0	0	0	0	0	0	0	0	0	0	0	0	0	0	0	0	0	0	0	0	0	0	0	0	0	5	0	0	0	0	0	0	0	0	0	0	0	0	0	0	0	0	0
50	348	Q8H159|UBQ10_ARATH	193.91	10	0	7	3	7	2	0	5	4	2	10	7	0	3	7	0	2	2	7	2	2	7	2	0	2	0	2	0	2	2	0	0	2	0	2	2	0	0	0	0	0	0	0	3	0	2
50	344	P0CH33|UBQ11_ARATH	193.91	21	0	14	6	14	4	0	10	8	4	21	14	0	6	14	0	4	4	14	4	4	14	4	0	4	0	4	0	4	4	0	0	4	0	4	4	0	0	0	0	0	0	0	6	0	4
50	290	Q3E7K8|UBQ12_ARATH	193.91	20	0	13	6	13	4	0	10	8	4	20	13	0	6	13	0	4	4	13	4	4	13	4	0	4	0	4	0	4	4	0	0	4	0	4	4	0	0	0	0	0	0	0	6	0	4
50	345	Q3E7T8|UBQ14_ARATH	193.91	15	0	10	4	10	3	0	7	6	3	15	10	0	4	10	0	3	3	10	3	3	10	3	0	3	0	3	0	3	3	0	0	3	0	3	3	0	0	0	0	0	0	0	4	0	3
50	346	Q1EC66|UBQ3_ARATH	193.91	15	0	10	4	10	3	0	7	6	3	15	10	0	4	10	0	3	3	10	3	3	10	3	0	3	0	3	0	3	3	0	0	3	0	3	3	0	0	0	0	0	0	0	4	0	3
50	347	P0CH32|UBQ4_ARATH	193.91	12	0	8	3	8	2	0	6	5	2	12	8	0	3	8	0	2	2	8	2	2	8	2	0	2	0	2	0	2	2	0	0	2	0	2	2	0	0	0	0	0	0	0	3	0	2
50	307	Q9FHQ6|UBQ9_ARATH	193.91	15	0	10	4	10	3	0	7	6	3	15	10	0	4	10	0	3	3	10	3	3	10	3	0	3	0	3	0	3	3	0	0	3	0	3	3	0	0	0	0	0	0	0	4	0	3
286	1768	Q9SW48|INVB_ARATH	55.43	2	0	0	0	0	0	0	0	0	0	0	0	2	0	0	0	0	0	0	0	0	0	0	0	0	0	0	0	0	0	0	0	0	0	0	0	0	0	0	0	0	0	0	0	0	2
286	847	F4I2X9|INVD_ARATH	55.43	2	0	0	0	0	0	0	0	0	0	0	0	2	0	0	0	0	0	0	0	0	0	0	0	0	0	0	0	0	0	0	0	0	0	0	0	0	0	0	0	0	0	0	0	0	2
286	1468	Q9C560|INVF_ARATH	55.43	3	0	0	0	0	0	0	0	0	0	0	0	3	0	0	0	0	0	0	0	0	0	0	0	0	0	0	0	0	0	0	0	0	0	0	0	0	0	0	0	0	0	0	0	0	3
219	586	O04487|EF1G1_ARATH	75.59	2	0	0	0	0	2	0	2	0	2	0	0	0	0	2	0	0	0	0	0	0	0	0	0	0	0	0	0	0	0	0	0	0	0	0	0	0	0	0	0	0	0	0	0	0	0
219	1083	Q9FVT2|EF1G2_ARATH	75.59	2	0	0	0	0	2	0	2	0	2	0	0	0	0	2	0	0	0	0	0	0	0	0	0	0	0	0	0	0	0	0	0	0	0	0	0	0	0	0	0	0	0	0	0	0	0
108	283	Q9SID0|SCRK1_ARATH	128.24	7	0	4	0	0	0	7	0	0	0	0	0	0	0	4	0	7	0	0	0	0	0	0	0	0	0	0	0	7	0	0	0	0	0	0	0	0	0	0	7	0	0	0	0	0	0
108	364	Q9LNE3|SCRK2_ARATH	128.24	7	0	4	0	0	0	7	0	0	0	0	0	0	0	4	0	7	0	0	0	0	0	0	0	0	0	0	0	7	0	0	0	0	0	0	0	0	0	0	7	0	0	0	0	0	0
108	312	Q9LNE4|SCRK3_ARATH	128.24	6	0	4	0	0	0	6	0	0	0	0	0	0	0	4	0	6	0	0	0	0	0	0	0	0	0	0	0	6	0	0	0	0	0	0	0	0	0	0	6	0	0	0	0	0	0
108	534	Q9M1B9|SCRK4_ARATH	128.24	7	0	4	0	0	0	7	0	0	0	0	0	0	0	4	0	7	0	0	0	0	0	0	0	0	0	0	0	7	0	0	0	0	0	0	0	0	0	0	7	0	0	0	0	0	0
101	310	O82616|SCRK5_ARATH	152.74	10	0	0	0	0	0	10	0	0	0	0	0	0	0	0	0	10	0	0	0	0	3	0	0	0	0	3	0	10	0	0	0	0	0	0	0	0	0	0	6	0	0	0	0	0	0
162	437	Q9FLH8|SCRK7_ARATH	114.43	6	0	0	0	0	0	6	0	0	0	0	0	0	0	0	0	3	0	0	0	0	0	0	0	0	0	0	0	6	0	0	0	0	0	0	0	0	0	0	3	0	0	0	0	0	0
354	4365	Q9LF09|CSLAB_ARATH	50.58	2	0	0	0	0	0	0	0	0	0	0	0	0	0	0	0	0	0	0	0	0	0	0	0	0	0	0	0	0	0	0	0	0	0	0	0	0	0	0	0	0	0	0	0	0	0
169	563	Q8W593|LGUC_ARATH	97.57	4	0	0	0	0	0	4	0	0	0	0	0	0	0	0	0	4	0	0	0	0	0	0	0	0	0	0	0	4	0	0	0	0	0	0	0	0	0	0	4	0	0	0	0	0	0
145	101	Q10MQ2|DAPAT_ORYSJ	174.37	17	0	0	0	0	0	0	13	0	0	0	0	0	0	0	0	0	0	0	0	0	0	0	0	0	0	0	0	0	0	11	3	0	3	0	0	0	0	0	0	0	13	0	0	0	0
329	938	C0LGK4|Y2165_ARATH	57.43	1	0	0	0	0	0	0	0	0	0	0	0	0	0	0	0	0	0	0	0	0	0	0	0	0	0	0	0	0	0	0	0	0	0	0	0	0	0	0	0	0	0	0	0	0	1
336	940	O04658|NOP5A_ARATH	49.67	0	0	0	0	0	0	0	0	0	0	0	0	0	0	0	0	0	0	0	0	0	0	0	0	0	0	0	0	0	0	0	0	0	0	0	0	0	0	0	0	0	0	0	0	0	0
342	1299	O49299|PGMC1_ARATH	57.65	2	0	0	0	2	0	0	0	0	0	0	0	0	0	0	0	0	0	0	0	0	0	0	0	0	0	0	0	0	0	0	0	0	0	0	0	0	0	0	0	0	0	0	0	0	0
342	1012	Q9SGC1|PGMC2_ARATH	57.65	2	0	0	0	2	0	0	0	0	0	0	0	0	0	0	0	0	0	0	0	0	0	0	0	0	0	0	0	0	0	0	0	0	0	0	0	0	0	0	0	0	0	0	0	0	0
213	377	Q93YW5|P2C58_ARATH	128.7	11	0	0	0	8	0	4	0	0	0	0	0	0	0	0	0	4	0	0	0	0	0	0	0	0	0	0	0	4	0	0	0	0	0	0	0	0	0	0	0	0	0	0	0	0	0
170	559	Q8LAY8|P2C69_ARATH	112.37	5	0	0	0	0	0	5	0	0	0	0	0	0	0	0	0	5	0	0	0	0	0	0	0	0	0	0	0	5	0	0	0	0	0	0	0	0	0	0	0	0	0	0	0	0	0
268	1054	Q9SUN3|ARAE3_ARATH	58.83	3	0	0	0	0	0	0	0	0	0	0	0	0	0	0	0	0	0	0	0	0	0	0	0	0	0	0	0	0	0	0	0	0	3	0	0	0	0	0	0	0	0	0	0	0	0
178	772	O23016|KCAB_ARATH	76.8	3	0	0	0	0	0	3	0	0	0	0	0	0	0	0	0	3	0	0	0	0	0	0	0	0	0	0	0	3	0	0	0	0	0	0	0	0	0	0	3	0	0	0	0	0	0
270	443	O04331|PHB3_ARATH	83.41	3	0	0	0	3	0	0	0	0	0	0	0	0	0	0	0	0	0	0	0	0	3	0	0	0	0	0	0	0	0	0	0	0	0	0	0	0	0	0	0	0	0	0	0	0	0
270	367	Q9LK25|PHB4_ARATH	83.41	3	0	0	0	3	0	0	0	0	0	0	0	0	0	0	0	0	0	0	0	0	3	0	0	0	0	0	0	0	0	0	0	0	0	0	0	0	0	0	0	0	0	0	0	0	0
248	184	Q9ZW35|PCNA2_ARATH	113.47	10	0	0	0	0	0	6	0	0	0	0	0	0	0	0	0	0	0	0	0	0	0	0	0	0	0	0	0	4	0	0	0	0	0	0	0	0	0	0	0	0	0	0	0	0	0
248	175	Q9M7Q7|PCNA1_ARATH	113.47	10	0	0	0	0	0	6	0	0	0	0	0	0	0	0	0	0	0	0	0	0	0	0	0	0	0	0	0	4	0	0	0	0	0	0	0	0	0	0	0	0	0	0	0	0	0
334	2829	P93732|PIP_ARATH	51.4	2	0	0	0	0	0	0	0	0	0	0	0	0	0	0	0	2	0	0	0	0	0	0	0	0	0	0	0	0	0	0	0	0	0	0	0	0	0	0	0	0	0	0	0	0	0
206	436	Q9M1R2|SYPC_ARATH	102.95	4	0	0	0	0	0	0	0	0	0	0	0	0	0	0	4	0	0	0	0	0	0	0	4	0	0	0	4	0	0	0	0	0	0	0	0	4	0	0	0	0	0	0	0	0	0
234	644	P34066|PSA1A_ARATH	65.22	4	0	0	0	0	0	4	0	0	0	0	0	0	0	0	0	4	0	0	0	0	0	0	0	0	0	0	0	4	0	0	0	0	0	0	0	0	0	0	0	0	0	0	0	0	0
234	748	O23712|PSA1B_ARATH	65.22	4	0	0	0	0	0	4	0	0	0	0	0	0	0	0	0	4	0	0	0	0	0	0	0	0	0	0	0	4	0	0	0	0	0	0	0	0	0	0	0	0	0	0	0	0	0
188	402	O23715|PSA3_ARATH	98.2	11	0	0	0	0	0	0	0	3	0	0	0	0	11	0	0	0	0	0	0	0	0	0	0	0	0	0	0	0	0	0	0	0	0	3	0	0	0	0	0	0	0	0	3	0	0
174	725	O81148|PSA4A_ARATH	81.53	4	0	0	0	0	0	0	0	4	0	0	0	0	4	0	0	0	0	0	0	0	0	0	0	0	0	0	0	0	0	0	0	0	0	4	0	0	0	0	0	0	0	0	4	0	0
138	255	O81149|PSA5A_ARATH	166.54	19	0	12	0	0	0	0	0	11	0	0	0	0	11	0	0	0	0	0	0	0	0	0	0	0	0	0	0	0	0	0	0	0	0	4	0	0	0	0	0	0	0	0	8	0	0
138	259	Q42134|PSA5B_ARATH	166.54	19	0	12	0	0	0	0	0	11	0	0	0	0	11	0	0	0	0	0	0	0	0	0	0	0	0	0	0	0	0	0	0	0	0	4	0	0	0	0	0	0	0	0	8	0	0
93	236	O81147|PSA6B_ARATH	191.82	15	0	0	0	0	0	0	0	15	0	0	0	0	15	0	0	0	0	0	0	0	0	0	0	0	0	0	0	0	8	0	0	0	0	15	0	0	0	0	0	0	0	0	15	0	0
119	359	P30186|PSA7A_ARATH	124.92	8	0	0	0	8	0	0	0	0	0	8	0	0	0	0	0	0	0	8	0	0	8	0	0	0	0	4	0	0	0	0	0	0	0	0	0	0	0	0	0	0	0	4	0	0	0
119	329	O24616|PSA7B_ARATH	124.92	8	0	0	0	8	0	0	0	0	0	8	0	0	0	0	0	0	0	8	0	0	8	0	0	0	0	4	0	0	0	0	0	0	0	0	0	0	0	0	0	0	0	4	0	0	0
315	1669	O23714|PSB2A_ARATH	53.4	4	0	4	0	0	0	0	0	0	0	0	0	0	0	0	0	0	0	0	0	0	0	0	0	0	0	0	0	0	0	0	0	0	0	0	0	0	0	0	0	0	0	0	0	0	0
315	2212	O24633|PSB2B_ARATH	53.4	5	0	5	0	0	0	0	0	0	0	0	0	0	0	0	0	0	0	0	0	0	0	0	0	0	0	0	0	0	0	0	0	0	0	0	0	0	0	0	0	0	0	0	0	0	0
159	1337	Q8LD27|PSB6_ARATH	76.74	4	0	4	4	0	0	0	0	0	4	0	4	0	0	4	0	0	0	0	0	0	0	0	0	0	0	0	0	0	0	0	0	0	0	0	0	0	0	0	0	0	0	0	0	0	0
148	645	Q7DLS1|PSB7B_ARATH	129.77	8	0	0	8	0	0	0	0	8	5	0	5	0	5	0	0	0	0	0	0	0	0	0	0	0	0	0	0	0	0	0	0	0	0	4	0	0	0	0	0	0	0	0	5	0	0
284	608	O22263|PDI21_ARATH	70.34	3	0	0	0	0	0	0	0	0	0	0	0	0	0	0	0	3	0	0	0	0	0	0	0	0	0	0	0	0	0	0	0	0	0	0	0	0	0	0	3	0	0	0	0	0	0
367	3701	Q9LVF4|DMP1_ARATH	49.16	0	0	0	0	0	0	0	0	0	0	0	0	0	0	0	0	0	0	0	0	0	0	0	0	0	0	0	0	0	0	0	0	0	0	0	0	0	0	0	0	0	0	0	0	0	0
295	5428	Q8GYA3|OPRL1_ARATH	66.69	3	0	0	0	0	0	0	0	0	0	0	0	0	0	0	0	0	0	0	0	0	0	0	0	0	0	0	0	0	0	0	0	0	0	0	0	0	0	0	0	0	3	0	0	0	0
345	5485	P0DI08|ORL2A_ARATH	50.85	3	0	0	0	0	0	0	0	0	0	0	0	0	0	0	0	0	0	0	0	0	0	0	0	0	0	0	0	0	0	3	0	0	0	0	0	0	0	0	0	0	0	0	0	0	0
345	5484	P0DI09|ORL2B_ARATH	50.85	3	0	0	0	0	0	0	0	0	0	0	0	0	0	0	0	0	0	0	0	0	0	0	0	0	0	0	0	0	0	3	0	0	0	0	0	0	0	0	0	0	0	0	0	0	0
360	2748	Q9FH13|RRAA3_ARATH	53.59	5	0	0	0	0	0	0	0	0	0	0	0	0	0	0	0	0	0	0	0	0	0	0	0	0	0	0	0	5	0	0	0	0	0	0	0	0	0	0	0	0	0	0	0	0	0
288	463	O22254|RL181_ARATH	49.84	0	0	0	0	0	0	0	0	0	0	0	0	0	0	0	0	0	0	0	0	0	0	0	0	0	0	0	0	0	0	0	0	0	0	0	0	0	0	0	0	0	0	0	0	0	0
174	1007	F4JJE5|PSA4B_ARATH	81.53	4	0	0	0	0	0	0	0	4	0	0	0	0	4	0	0	0	0	0	0	0	0	0	0	0	0	0	0	0	0	0	0	0	0	4	0	0	0	0	0	0	0	0	4	0	0
268	1356	O64749|ARAE2_ARATH	58.83	3	0	0	0	0	0	0	0	0	0	0	0	0	0	0	0	0	0	0	0	0	0	0	0	0	0	0	0	0	0	0	0	0	3	0	0	0	0	0	0	0	0	0	0	0	0
363	5447	O82647|PDC1_ARATH	50.87	2	0	0	0	0	0	0	2	0	0	0	0	0	0	0	0	0	0	0	0	0	0	0	0	0	0	0	0	0	0	0	0	0	0	0	0	0	0	0	0	0	0	0	0	0	0
363	5383	Q9FFT4|PDC2_ARATH	50.87	2	0	0	0	0	0	0	2	0	0	0	0	0	0	0	0	0	0	0	0	0	0	0	0	0	0	0	0	0	0	0	0	0	0	0	0	0	0	0	0	0	0	0	0	0	0
260	208	O23404|PPDK1_ARATH	101.71	2	0	0	0	0	0	0	0	0	0	0	0	0	0	0	0	0	2	0	0	0	0	0	0	0	0	0	0	0	0	0	0	0	0	0	0	0	0	0	0	0	0	0	0	0	0
66	170	O49513|RAA1E_ARATH	188.53	22	0	17	17	5	0	0	0	10	15	10	18	0	10	17	0	0	0	10	0	0	5	0	0	0	0	5	0	0	5	0	0	0	0	10	0	0	0	0	0	0	0	0	5	0	0
45	173	Q9FJH0|RAA1F_ARATH	208.9	26	0	26	26	5	0	0	0	15	15	10	23	0	15	26	0	0	0	15	0	0	10	0	0	0	0	10	0	0	5	0	0	0	0	15	0	0	0	0	0	0	0	5	10	0	0
45	117	Q9LK99|RAA1G_ARATH	208.9	26	0	26	26	5	0	0	0	15	15	10	23	0	15	26	0	0	0	15	0	0	10	0	0	0	0	10	0	0	5	0	0	0	0	15	0	0	0	0	0	0	0	5	10	0	0
69	155	Q1PEX3|RAA1H_ARATH	191.88	22	0	22	17	5	0	0	0	10	10	10	14	0	10	17	0	0	0	10	0	0	5	0	0	0	0	5	0	0	5	0	0	0	0	10	0	0	0	0	0	0	0	0	5	0	0
63	181	Q9LNW1|RAA2B_ARATH	193.3	22	0	17	17	5	0	0	0	13	18	10	18	0	13	14	0	0	0	10	0	0	5	0	0	0	0	5	0	0	5	0	0	0	0	10	0	0	0	0	0	0	0	0	8	0	0
63	163	Q96283|RAA2C_ARATH	193.3	22	0	17	17	5	0	0	0	13	18	10	18	0	13	13	0	0	0	10	0	0	5	0	0	0	0	5	0	0	5	0	0	0	0	10	0	0	0	0	0	0	0	0	8	0	0
86	204	Q9FJN8|RAA4A_ARATH	169.86	16	0	5	10	5	0	0	0	16	5	5	5	0	13	10	0	0	0	5	0	0	5	0	0	0	0	5	0	0	5	0	0	0	0	10	0	0	0	0	0	0	0	0	8	0	0
85	237	Q9FE79|RAA4C_ARATH	171.57	17	0	9	13	5	0	0	0	13	5	5	9	0	13	13	0	0	0	5	0	0	5	0	0	0	0	5	0	0	5	0	0	0	0	10	0	0	0	0	0	0	0	0	5	0	0
99	349	Q9SIP0|RAA5D_ARATH	153.2	15	0	5	5	5	0	0	0	9	5	5	11	0	9	5	0	0	0	5	0	0	5	0	0	0	0	5	0	0	0	0	0	0	0	5	0	0	0	0	0	0	0	0	5	0	0
151	147	P92963|RAB1C_ARATH	192.48	35	0	24	13	0	0	0	0	0	6	0	19	0	0	13	0	0	0	0	0	0	0	0	0	0	0	0	0	0	0	0	0	0	0	0	0	0	0	0	0	0	0	0	0	0	0
195	248	O23657|RABC1_ARATH	116.88	15	0	9	5	0	0	0	0	0	0	0	5	0	0	6	0	0	0	0	0	0	0	0	0	0	0	0	0	0	0	0	0	0	0	0	0	0	0	0	0	0	0	0	0	0	0
105	351	P28188|RAD2A_ARATH	145.53	15	0	15	11	0	0	0	0	0	11	0	11	0	0	11	0	0	0	0	0	0	0	0	0	0	0	0	0	0	0	0	0	0	0	0	0	0	0	0	0	0	0	0	0	0	0
105	215	Q9FPJ4|RAD2B_ARATH	145.53	15	0	15	11	0	0	0	0	0	11	0	11	0	0	11	0	0	0	0	0	0	0	0	0	0	0	0	0	0	0	0	0	0	0	0	0	0	0	0	0	0	0	0	0	0	0
105	212	Q9SEH3|RAD2C_ARATH	145.53	15	0	15	11	0	0	0	0	0	11	0	11	0	0	11	0	0	0	0	0	0	0	0	0	0	0	0	0	0	0	0	0	0	0	0	0	0	0	0	0	0	0	0	0	0	0
74	109	P28186|RAE1C_ARATH	189.15	25	0	25	25	0	0	0	0	0	21	0	25	0	6	19	0	0	0	0	0	0	0	0	0	0	0	0	0	0	0	0	0	0	0	0	0	0	0	0	0	0	0	0	0	0	0
74	179	Q9LZD4|RAE1D_ARATH	189.15	25	0	25	25	0	0	0	0	0	21	0	25	0	6	19	0	0	0	0	0	0	0	0	0	0	0	0	0	0	0	0	0	0	0	0	0	0	0	0	0	0	0	0	0	0	0
240	905	Q9SJ11|RABG2_ARATH	72.38	5	0	5	0	0	0	0	0	0	0	0	5	0	0	5	0	0	0	0	0	0	0	0	0	0	0	0	0	0	0	0	0	0	0	0	0	0	0	0	0	0	0	0	0	0	0
240	948	Q948K8|RAG3A_ARATH	72.38	5	0	5	0	0	0	0	0	0	0	0	5	0	0	5	0	0	0	0	0	0	0	0	0	0	0	0	0	0	0	0	0	0	0	0	0	0	0	0	0	0	0	0	0	0	0
182	372	O04157|RAG3B_ARATH	114.58	10	0	10	5	0	0	0	0	0	0	0	10	0	0	4	0	0	0	0	0	0	0	0	0	0	0	0	0	0	0	0	0	0	0	0	0	0	0	0	0	0	0	0	0	0	0
155	144	Q9LS94|RAG3F_ARATH	138.85	19	0	14	16	0	0	0	0	0	5	0	16	0	0	5	0	0	0	0	0	0	0	0	0	0	0	0	0	0	0	0	0	0	0	0	0	0	0	0	0	0	0	0	0	0	0
122	249	O80501|RAH1B_ARATH	114.34	11	0	5	11	0	0	0	0	0	5	0	11	0	0	11	0	0	0	0	0	0	0	0	0	0	0	0	0	0	0	0	0	0	0	0	0	0	0	0	0	0	0	0	0	0	0
122	289	Q9SMR4|RAH1C_ARATH	114.34	10	0	5	10	0	0	0	0	0	5	0	10	0	0	10	0	0	0	0	0	0	0	0	0	0	0	0	0	0	0	0	0	0	0	0	0	0	0	0	0	0	0	0	0	0	0
122	270	Q9SID8|RAH1D_ARATH	114.34	11	0	5	11	0	0	0	0	0	5	0	11	0	0	11	0	0	0	0	0	0	0	0	0	0	0	0	0	0	0	0	0	0	0	0	0	0	0	0	0	0	0	0	0	0	0
122	226	Q9LFT9|RAH1E_ARATH	114.34	11	0	5	11	0	0	0	0	0	5	0	11	0	0	11	0	0	0	0	0	0	0	0	0	0	0	0	0	0	0	0	0	0	0	0	0	0	0	0	0	0	0	0	0	0	0
143	739	O24456|GBLPA_ARATH	97.82	3	0	0	0	0	0	3	0	0	0	0	0	0	0	0	0	3	0	3	0	0	0	0	0	0	0	0	0	3	0	0	0	0	0	0	0	0	0	0	3	0	0	0	0	0	0
143	451	Q9C4Z6|GPLPB_ARATH	97.82	3	0	0	0	0	0	3	0	0	0	0	0	0	0	0	0	3	0	3	0	0	0	0	0	0	0	0	0	3	0	0	0	0	0	0	0	0	0	0	3	0	0	0	0	0	0
143	604	Q9LV28|GPLPC_ARATH	97.82	3	0	0	0	0	0	3	0	0	0	0	0	0	0	0	0	3	0	3	0	0	0	0	0	0	0	0	0	3	0	0	0	0	0	0	0	0	0	0	3	0	0	0	0	0	0
123	396	Q9FEF8|FBRL1_ARATH	120	7	0	0	4	4	0	7	0	4	0	0	4	0	4	0	0	4	0	0	0	0	4	0	0	0	0	4	0	4	4	0	0	0	4	4	0	0	0	0	4	0	0	4	4	0	0
123	389	Q94AH9|FBRL2_ARATH	120	7	0	0	3	3	0	7	0	3	0	0	3	0	3	0	0	3	0	0	0	0	3	0	0	0	0	3	0	3	3	0	0	0	3	3	0	0	0	0	3	0	0	3	3	0	0
335	371	P08823|RUBA_WHEAT	58.85	3	0	0	0	0	0	0	0	0	0	0	0	0	0	0	0	0	0	0	0	0	0	0	0	0	0	0	0	0	0	0	0	0	0	0	0	0	0	0	0	0	0	0	0	0	0
80	91	P23686|METK1_ARATH	227.63	23	0	0	0	4	8	4	15	0	0	0	0	2	0	0	0	3	0	3	0	0	5	0	0	0	0	3	0	4	0	6	6	0	9	6	0	0	0	0	0	0	10	3	0	0	9
98	257	Q9SJL8|METK3_ARATH	184.62	9	0	0	0	4	0	4	9	0	0	0	0	2	0	0	0	0	0	0	0	0	2	0	0	0	0	0	0	4	0	4	4	0	4	7	0	0	0	0	0	0	4	0	0	0	6
83	129	Q9LUT2|METK4_ARATH	221.93	18	0	0	0	4	3	4	15	0	0	0	0	2	0	0	0	3	0	3	0	0	5	0	0	0	0	3	0	4	0	6	6	0	6	6	0	0	0	0	0	0	10	3	0	0	9
246	136	Q94C74|GLYM2_ARATH	113.15	4	0	0	0	0	0	0	0	0	0	0	0	0	0	0	0	0	0	0	0	0	0	0	2	0	0	0	0	0	0	0	0	0	0	0	0	0	0	0	0	0	0	0	0	0	2
61	132	O23254|GLYC4_ARATH	203.78	15	7	0	0	0	9	0	0	0	0	0	0	6	0	0	5	0	0	0	0	0	0	0	7	0	7	0	3	0	0	0	0	0	0	0	0	7	7	0	0	0	0	0	0	0	11
134	509	Q9SVM4|GLYC5_ARATH	93.9	3	1	0	0	0	1	0	0	0	0	0	0	3	0	0	0	0	0	0	0	0	0	0	0	0	1	0	0	0	0	0	0	0	0	0	0	1	1	0	0	0	0	0	0	0	3
179	505	Q9LM59|GLYC6_ARATH	84.34	2	0	0	0	0	2	0	0	0	0	0	0	2	0	0	2	0	0	0	0	0	0	0	2	0	0	0	0	0	0	0	0	0	0	0	0	0	0	0	0	0	0	0	0	0	2
179	943	Q84WV0|GLYC7_ARATH	84.34	2	0	0	0	0	2	0	0	0	0	0	0	2	0	0	2	0	0	0	0	0	0	0	2	0	0	0	0	0	0	0	0	0	0	0	0	0	0	0	0	0	0	0	0	0	2
332	1617	Q9XFR5|SR30_ARATH	53.05	4	0	0	0	0	0	0	0	0	0	0	0	0	0	0	0	0	0	0	0	0	0	0	0	0	0	0	0	4	0	0	0	0	0	0	0	0	0	0	0	0	0	0	0	0	0
332	3854	F4JHI7|SR34B_ARATH	53.05	4	0	0	0	0	0	0	0	0	0	0	0	0	0	0	0	0	0	0	0	0	0	0	0	0	0	0	0	4	0	0	0	0	0	0	0	0	0	0	0	0	0	0	0	0	0
294	3616	P43291|SRK2A_ARATH	54.22	4	0	0	0	4	0	0	0	0	0	0	0	0	0	0	0	0	0	0	0	0	0	0	0	0	0	0	0	0	0	0	0	0	0	0	0	0	0	0	0	0	0	0	0	0	0
294	1757	Q9C958|SRK2B_ARATH	54.22	4	0	0	0	4	0	0	0	0	0	0	0	0	0	0	0	0	0	0	0	0	0	0	0	0	0	0	0	0	0	0	0	0	0	0	0	0	0	0	0	0	0	0	0	0	0
294	5432	P43292|SRK2G_ARATH	54.22	5	0	0	0	5	0	0	0	0	0	0	0	0	0	0	0	0	0	0	0	0	0	0	0	0	0	0	0	0	0	0	0	0	0	0	0	0	0	0	0	0	0	0	0	0	0
294	5433	Q9FFP9|SRK2H_ARATH	54.22	4	0	0	0	4	0	0	0	0	0	0	0	0	0	0	0	0	0	0	0	0	0	0	0	0	0	0	0	0	0	0	0	0	0	0	0	0	0	0	0	0	0	0	0	0	0
133	110	Q41593|SPZ1A_WHEAT	188.22	19	0	0	0	9	0	0	0	0	0	0	0	0	0	0	0	0	0	12	0	0	16	0	0	0	0	0	0	0	0	0	0	0	0	0	0	0	0	0	0	0	0	6	0	0	0
141	111	P93693|SPZ1B_WHEAT	186.25	19	0	0	0	13	0	0	0	0	0	0	0	0	0	0	0	0	0	12	0	0	9	0	0	0	0	0	0	0	0	0	0	0	0	0	0	0	0	0	0	0	0	3	0	0	0
197	275	Q93V56|IPYR1_ARATH	102.16	3	0	0	3	0	0	0	0	3	3	0	0	0	0	0	0	0	0	0	0	0	3	0	0	0	0	0	0	0	0	0	0	0	0	3	0	0	0	0	0	0	0	0	3	0	0
198	360	Q9LFF9|IPYR4_ARATH	118.86	9	0	0	3	0	0	0	0	3	3	0	0	0	0	6	0	0	0	0	0	0	3	0	0	0	0	0	0	0	0	0	0	0	0	3	0	0	0	0	0	0	0	0	3	0	0
197	282	O82597|IPYR5_ARATH	102.16	3	0	0	3	0	0	0	0	3	3	0	0	0	0	0	0	0	0	0	0	0	3	0	0	0	0	0	0	0	0	0	0	0	0	3	0	0	0	0	0	0	0	0	3	0	0
130	571	O48661|SPDS2_ARATH	121.02	8	0	0	0	0	0	4	0	0	0	0	0	0	0	0	0	4	0	0	0	0	0	0	0	0	0	0	0	8	0	0	0	0	0	0	0	0	0	0	8	0	0	0	0	0	0
292	2550	Q9LF04|STAD1_ARATH	59.32	3	0	0	0	0	0	0	0	0	0	0	0	0	0	0	0	3	0	0	0	0	0	0	0	0	0	0	0	0	0	0	0	0	0	0	0	0	0	0	0	0	0	0	3	0	0
292	2737	Q9LF05|STAD3_ARATH	59.32	3	0	0	0	0	0	0	0	0	0	0	0	0	0	0	0	3	0	0	0	0	0	0	0	0	0	0	0	0	0	0	0	0	0	0	0	0	0	0	0	0	0	0	3	0	0
292	3140	Q9M879|STAD5_ARATH	59.32	3	0	0	0	0	0	0	0	0	0	0	0	0	0	0	0	3	0	0	0	0	0	0	0	0	0	0	0	0	0	0	0	0	0	0	0	0	0	0	0	0	0	0	3	0	0
292	1180	O22832|STAD7_ARATH	59.32	3	0	0	0	0	0	0	0	0	0	0	0	0	0	0	0	3	0	0	0	0	0	0	0	0	0	0	0	0	0	0	0	0	0	0	0	0	0	0	0	0	0	0	3	0	0
150	253	P49040|SUS1_ARATH	144.98	4	0	0	0	0	0	0	0	0	0	0	0	0	0	0	0	0	0	0	0	0	0	0	0	3	0	0	0	0	0	0	0	0	0	0	1	0	0	3	0	3	0	0	0	0	0
132	476	Q00917|SUS2_ARATH	118.79	2	0	0	0	0	0	0	0	0	0	0	0	0	0	0	0	0	0	0	0	1	0	0	0	2	0	0	0	0	0	0	0	0	0	0	2	0	0	2	0	2	0	0	0	0	0
150	308	Q9LXL5|SUS4_ARATH	144.98	4	0	0	0	0	0	0	0	0	0	0	0	0	0	0	0	0	0	0	0	0	0	0	0	3	0	0	0	0	0	0	0	0	0	0	1	0	0	3	0	3	0	0	0	0	0
285	384	P28769|TCPA_ARATH	52.1	2	0	0	0	0	0	0	0	0	0	0	0	0	0	0	0	0	0	0	0	0	0	0	0	0	0	0	0	0	2	0	0	0	0	0	0	0	0	0	0	0	0	0	0	0	0
111	76	Q940P8|TCPB_ARATH	219.73	19	0	0	0	4	0	0	0	4	0	2	0	0	4	0	0	0	0	0	0	0	8	0	0	0	0	2	0	0	0	0	0	0	0	4	0	2	0	0	0	0	0	0	4	0	0
326	779	Q9LV21|TCPD_ARATH	48.93	0	0	0	0	0	0	0	0	0	0	0	0	0	0	0	0	0	0	0	0	0	0	0	0	0	0	0	0	0	0	0	0	0	0	0	0	0	0	0	0	0	0	0	0	0	0
114	106	O04450|TCPE_ARATH	185.26	11	0	0	0	10	0	0	0	0	0	6	0	0	0	0	0	0	0	10	0	0	9	0	0	0	0	6	0	0	0	0	0	0	0	0	0	0	0	0	0	0	0	4	0	0	0
279	247	Q94K05|TCPQ_ARATH	72.38	0	0	0	0	0	0	0	0	0	0	0	0	0	0	0	0	0	0	0	0	0	0	0	0	0	0	0	0	0	0	0	0	0	0	0	0	0	0	0	0	0	0	0	0	0	0
266	529	Q39243|TRXB1_ARATH	68.98	4	0	0	0	0	0	0	0	0	0	0	0	0	0	0	0	4	0	0	0	0	0	0	0	0	0	0	0	4	0	0	0	0	0	0	0	0	0	0	4	0	0	0	0	0	0
266	613	Q39242|TRXB2_ARATH	68.98	4	0	0	0	0	0	0	0	0	0	0	0	0	0	0	0	4	0	0	0	0	0	0	0	0	0	0	0	4	0	0	0	0	0	0	0	0	0	0	4	0	0	0	0	0	0
210	268	Q9S7B5|THRC1_ARATH	110.64	5	0	0	0	0	5	0	0	0	0	0	0	2	0	0	0	0	0	0	0	0	0	0	0	0	0	0	0	0	0	0	0	0	0	0	0	0	2	0	0	0	0	0	0	0	2
222	338	Q8RWV0|TKTC1_ARATH	87.42	3	0	0	0	0	0	0	0	0	0	0	0	0	0	0	0	0	0	0	0	1	0	0	0	3	0	0	0	0	0	0	0	0	0	0	1	0	0	1	0	1	0	0	0	0	0
222	599	F4IW47|TKTC2_ARATH	87.42	3	0	0	0	0	0	0	0	0	0	0	0	0	0	0	0	0	0	0	0	1	0	0	0	3	0	0	0	0	0	0	0	0	0	0	1	0	0	1	0	1	0	0	0	0	0
46	149	Q8LRM8|TCTP_WHEAT	258.67	44	0	35	28	0	0	0	0	0	33	0	40	0	8	30	0	0	0	0	0	0	0	0	0	0	0	0	0	0	0	0	0	0	0	0	0	0	0	0	0	0	0	0	0	0	0
247	126	Q38J50|FOMT2_WHEAT	105.24	7	0	0	0	0	0	0	0	0	0	0	0	0	0	0	0	7	0	0	0	0	0	0	0	0	0	0	0	4	0	0	0	0	0	0	0	0	0	0	0	0	0	0	0	0	0
62	294	P48491|TPIS_ARATH	129.02	7	0	7	7	0	0	0	0	7	7	0	7	0	7	4	0	0	0	0	0	0	0	0	0	0	0	0	0	0	4	0	0	0	0	4	0	0	0	0	0	0	0	0	4	0	0
331	1444	Q9LHT0|TRNHF_ARATH	52.96	3	0	0	0	0	0	0	0	0	0	0	0	0	0	0	0	0	0	3	0	0	0	0	0	0	0	0	0	0	0	0	0	0	0	0	0	0	0	0	0	0	0	0	0	0	0
41	24	Q9ZRB7|TBA_WHEAT	288.73	48	7	0	0	6	27	8	8	0	0	0	0	22	4	0	14	6	8	11	4	9	0	4	14	4	8	0	3	2	4	4	2	8	7	4	0	13	9	8	0	3	11	0	0	0	13
144	99	P11139|TBA1_ARATH	181.54	18	3	0	0	0	8	2	2	0	0	0	0	8	0	0	4	2	0	6	0	4	0	0	2	0	0	0	0	0	4	0	0	0	0	0	0	0	0	0	0	0	0	0	0	0	2
55	57	B9DGT7|TBA2_ARATH	262.54	32	7	0	0	0	19	4	4	2	2	0	0	15	4	2	11	6	8	11	4	9	0	4	10	4	8	0	3	0	4	4	0	8	4	4	0	8	2	8	0	3	4	0	0	0	8
84	74	Q56WH1|TBA3_ARATH	224.05	24	0	0	0	0	12	4	4	2	2	0	0	13	0	2	6	2	3	6	0	4	0	0	5	0	3	0	3	0	4	0	0	3	0	0	0	3	5	3	0	3	0	0	0	0	4
55	56	Q0WV25|TBA4_ARATH	262.54	32	7	0	0	0	19	4	4	2	2	0	0	15	4	2	11	6	8	11	4	9	0	4	10	4	8	0	3	0	4	4	0	8	4	4	0	8	2	8	0	3	4	0	0	0	8
84	75	B9DHQ0|TBA5_ARATH	224.05	24	0	0	0	0	12	4	4	2	2	0	0	13	0	2	6	2	3	6	0	4	0	0	5	0	3	0	3	0	4	0	0	3	0	0	0	3	5	3	0	3	0	0	0	0	4
55	54	P29511|TBA6_ARATH	262.54	32	7	0	0	0	19	4	4	2	2	0	0	15	4	2	11	6	8	11	4	9	0	4	10	4	8	0	3	0	4	4	0	8	4	4	0	8	2	8	0	3	4	0	0	0	8
30	16	Q9ZRB2|TBB1_WHEAT	282.92	41	9	0	0	0	20	10	15	2	0	2	0	19	0	0	23	4	3	2	2	2	3	0	25	2	11	0	16	10	0	2	5	2	15	0	0	19	9	9	0	0	8	0	0	0	20
36	15	Q9ZRB1|TBB2_WHEAT	286.61	45	9	0	0	0	21	12	12	2	0	0	0	21	0	0	24	6	3	2	2	2	3	0	23	2	9	0	15	10	0	0	3	2	13	0	0	17	7	9	0	0	8	0	0	0	18
18	12	Q9ZRB0|TBB3_WHEAT	307.49	54	14	0	0	3	20	9	14	2	0	3	0	22	0	0	31	9	3	4	2	2	5	0	40	2	8	3	19	10	0	0	3	5	14	0	0	16	9	6	0	0	4	0	0	0	23
23	17	Q9ZRA9|TBB4_WHEAT	294.49	42	11	0	0	3	24	10	15	2	0	3	0	24	0	0	27	9	3	4	0	2	5	0	25	0	11	3	16	8	0	0	3	0	16	0	0	17	7	9	0	0	6	0	0	0	21
30	13	Q9ZRA8|TBB5_WHEAT	282.92	40	9	0	0	0	20	10	15	2	0	2	0	19	0	0	23	4	3	2	2	2	3	0	25	2	11	0	15	10	0	2	5	2	15	0	0	19	9	9	0	0	8	0	0	0	20
42	28	P29514|TBB6_ARATH	271.21	34	8	0	0	0	14	6	9	2	0	0	0	13	0	0	15	4	3	2	2	2	3	0	25	2	8	0	11	7	0	0	3	2	9	0	0	15	9	6	0	0	2	0	0	0	14
38	20	P29516|TBB8_ARATH	284.43	47	8	0	0	0	21	10	12	2	0	0	0	20	0	0	32	4	3	2	2	2	3	0	27	2	11	0	15	7	0	0	3	2	12	0	0	19	9	9	0	0	5	0	0	0	18
50	327	P59271|R27AA_ARATH	193.91	30	0	20	8	20	6	0	14	12	6	30	20	0	8	20	0	6	6	20	6	6	20	6	0	6	0	6	0	6	6	0	0	6	0	6	6	0	0	0	0	0	0	0	8	0	6
50	328	P59232|R27AB_ARATH	193.91	30	0	20	8	20	6	0	14	11	6	30	20	0	8	20	0	6	6	20	6	6	20	6	0	6	0	6	0	6	6	0	0	6	0	6	6	0	0	0	0	0	0	0	8	0	6
50	322	P59233|R27AC_ARATH	193.91	30	0	20	8	20	6	0	14	11	6	30	20	0	8	20	0	6	6	20	6	6	20	6	0	6	0	6	0	6	6	0	0	6	0	6	6	0	0	0	0	0	0	0	8	0	6
50	358	B9DHA6|RL40A_ARATH	193.91	37	0	24	10	24	7	0	17	14	7	37	24	0	10	24	0	7	7	24	7	7	24	7	0	7	0	7	0	7	7	0	0	7	0	7	7	0	0	0	0	0	0	0	10	0	7
50	357	Q42202|RL40B_ARATH	193.91	37	0	24	10	24	7	0	17	14	7	37	24	0	10	24	0	7	7	24	7	7	24	7	0	7	0	7	0	7	7	0	0	7	0	7	7	0	0	0	0	0	0	0	10	0	7
167	79	P20973|UBE11_WHEAT	179.64	11	0	0	0	0	0	0	0	0	0	0	0	0	0	0	0	0	5	0	0	0	0	0	0	0	0	0	0	0	0	0	0	5	0	0	0	0	0	0	0	0	0	0	0	0	0
167	82	P31251|UBE12_WHEAT	179.64	11	0	0	0	0	0	0	0	0	0	0	0	0	0	0	0	0	5	0	0	0	0	0	0	0	0	0	0	0	0	0	0	5	0	0	0	0	0	0	0	0	0	0	0	0	0
50	303	Q9SHE7|RUB1_ARATH	193.91	30	0	20	8	20	6	0	14	12	6	30	20	0	8	20	0	6	6	20	6	6	20	6	0	6	0	6	0	6	6	0	0	6	0	6	6	0	0	0	0	0	0	0	8	0	6
50	302	Q8RUC6|RUB2_ARATH	193.91	31	0	20	8	20	6	0	14	12	6	31	20	0	8	20	0	6	6	20	6	6	20	6	0	6	0	6	0	6	6	0	0	6	0	6	6	0	0	0	0	0	0	0	8	0	6
268	894	Q9SA77|ARAE1_ARATH	58.83	3	0	0	0	0	0	0	0	0	0	0	0	0	0	0	0	0	0	0	0	0	0	0	0	0	0	0	0	0	0	0	0	0	3	0	0	0	0	0	0	0	0	0	0	0	0
175	124	Q9ZUY6|AXS1_ARATH	177.29	17	0	0	0	0	0	0	5	0	0	0	0	0	0	0	0	0	0	0	0	0	0	0	0	0	0	0	0	0	0	0	3	0	3	0	0	0	0	0	0	0	13	0	0	0	0
175	118	Q9SGE0|AXS2_ARATH	177.29	17	0	0	0	0	0	0	5	0	0	0	0	0	0	0	0	0	0	0	0	0	0	0	0	0	0	0	0	0	0	0	3	0	3	0	0	0	0	0	0	0	13	0	0	0	0
7	108	Q9FZE1|UGDH1_ARATH	262.33	18	5	2	2	5	16	5	10	0	2	5	2	10	5	2	5	5	5	5	2	0	5	5	7	0	7	2	0	5	0	7	7	2	12	5	0	8	10	2	5	2	12	5	2	0	10
8	69	Q9LIA8|UGDH2_ARATH	252.35	21	5	2	2	6	15	5	14	0	2	2	2	10	5	2	5	5	5	5	2	0	5	5	5	0	13	2	0	6	0	5	8	7	13	6	0	8	10	2	5	2	12	5	2	0	11
10	93	Q9FM01|UGDH4_ARATH	233.94	14	5	2	2	6	10	5	6	0	2	2	2	10	5	2	5	5	5	5	2	0	5	5	5	0	6	2	0	6	0	5	5	2	7	6	0	5	5	2	5	2	7	5	2	0	10
161	130	Q9LZI2|UXS2_ARATH	165.22	13	0	0	0	2	0	7	0	0	0	0	0	0	0	0	0	13	0	0	0	0	0	0	0	0	0	0	0	4	0	0	0	0	0	0	0	0	0	0	2	0	0	0	0	0	0
212	411	Q9FIE8|UXS3_ARATH	123.55	8	0	0	0	0	0	0	0	0	2	4	0	0	0	0	0	2	0	4	0	0	2	0	0	0	0	0	0	2	0	0	0	0	0	0	0	0	0	0	0	0	0	0	0	0	0
161	121	Q8S8T4|UXS4_ARATH	165.22	13	0	0	0	2	0	7	0	0	0	0	0	0	0	0	0	13	0	0	0	0	0	0	0	0	0	0	0	4	0	0	0	0	0	0	0	0	0	0	2	0	0	0	0	0	0
212	418	Q9SN95|UXS5_ARATH	123.55	9	0	0	0	0	0	0	0	0	2	4	0	0	0	0	0	2	0	4	0	0	2	0	0	0	0	0	0	2	0	0	0	0	0	0	0	0	0	0	0	0	0	0	0	0	0
212	440	Q9ZV36|UXS6_ARATH	123.55	8	0	0	0	0	0	0	0	0	2	4	0	0	0	0	0	2	0	4	0	0	2	0	0	0	0	0	0	2	0	0	0	0	0	0	0	0	0	0	0	0	0	0	0	0	0
357	2086	Q9FN03|UVR8_ARATH	76.75	2	0	0	0	0	0	0	0	0	0	0	0	2	0	0	0	0	0	0	0	0	0	0	0	0	0	0	0	0	0	0	0	0	0	0	0	0	0	0	0	0	0	0	0	0	0
311	996	O04905|KCY3_ARATH	48.79	0	0	0	0	0	0	0	0	0	0	0	0	0	0	0	0	0	0	0	0	0	0	0	0	0	0	0	0	0	0	0	0	0	0	0	0	0	0	0	0	0	0	0	0	0	0
264	271	Q2QMN7|UAH_ORYSJ	100.23	2	0	0	0	0	0	0	0	0	0	0	0	2	0	0	0	0	0	0	0	0	0	0	0	0	0	0	0	0	0	0	0	0	0	0	0	0	0	0	0	0	0	0	0	0	2
230	4501	O04420|URIC_ARATH	72.32	3	0	0	0	0	0	3	0	0	0	0	0	0	0	0	0	3	0	0	0	0	0	0	0	0	0	0	0	3	0	0	0	0	0	0	0	0	0	0	3	0	0	0	0	0	0
183	691	Q42586|UMPS_ARATH	66.69	2	0	0	0	0	2	0	0	0	0	0	0	2	0	0	0	0	0	0	0	0	0	0	0	0	0	0	0	0	0	0	0	0	2	0	0	0	2	0	0	0	0	0	0	0	2
65	95	P57751|UGPA1_ARATH	212.52	13	13	0	0	0	4	0	0	0	0	0	0	4	0	0	13	0	0	0	0	0	0	0	13	0	4	0	6	0	0	0	0	0	0	0	0	12	7	0	0	0	0	0	0	0	8
65	103	Q9M9P3|UGPA2_ARATH	212.52	13	13	0	0	0	4	0	0	0	0	0	0	4	0	0	13	0	0	0	0	0	0	0	13	0	4	0	6	0	0	0	0	0	0	0	0	12	7	0	0	0	0	0	0	0	8
78	22	P11574|VATB1_ARATH	250.32	43	16	2	7	0	0	0	0	0	0	0	0	0	0	3	15	0	0	0	0	0	0	0	34	0	0	0	9	0	0	0	0	0	0	0	0	16	0	0	0	0	0	0	0	0	0
77	14	Q9SZN1|VATB2_ARATH	257.09	45	15	2	7	0	0	0	0	0	0	2	0	0	0	3	17	0	0	2	0	0	0	0	34	0	0	0	6	0	0	0	0	0	0	0	0	13	0	0	0	0	0	0	0	0	0
78	19	Q8W4E2|VATB3_ARATH	250.32	43	16	2	7	0	0	0	0	0	0	0	0	0	0	3	15	0	0	0	0	0	0	0	34	0	0	0	9	0	0	0	0	0	0	0	0	16	0	0	0	0	0	0	0	0	0
223	352	Q41396|VATE_SPIOL	86.81	7	0	0	0	0	0	0	0	0	0	0	0	0	0	0	0	3	0	0	0	0	0	0	0	0	0	0	0	3	0	0	0	0	0	0	0	0	0	0	0	0	0	0	0	0	0
223	365	Q39258|VATE1_ARATH	86.81	7	0	0	0	0	0	0	0	0	0	0	0	0	0	0	0	3	0	0	0	0	0	0	0	0	0	0	0	3	0	0	0	0	0	0	0	0	0	0	0	0	0	0	0	0	0
225	387	P0CAN7|VATE3_ARATH	76.58	3	0	0	0	0	0	0	0	0	0	0	0	0	0	0	0	0	0	0	0	0	0	0	0	0	0	0	0	3	0	0	0	0	0	0	0	0	0	0	0	0	0	0	0	0	0
103	232	Q8L5C6|XIP1_WHEAT	214.49	15	0	0	0	11	0	0	0	7	0	7	0	0	0	0	0	0	0	11	0	0	15	0	0	0	0	6	0	0	0	0	0	0	0	15	0	0	0	0	0	0	0	10	0	0	0
269	1591	F4K1Z0|ECT3_ARATH	53.07	2	0	0	2	0	0	0	0	0	0	0	0	0	0	0	0	0	0	0	0	0	0	0	0	0	0	0	0	0	0	0	0	0	0	0	0	0	0	0	0	0	0	0	2	0	0
373	5559	Q94EG9|ZIP11_ARATH	47.88	0	0	0	0	0	0	0	0	0	0	0	0	0	0	0	0	0	0	0	0	0	0	0	0	0	0	0	0	0	0	0	0	0	0	0	0	0	0	0	0	0	0	0	0	0	0
[truncated: 173 more columns]

## Sheet: Table S4-3
Table S2-2 List of protein groups dentified in protein extracts, isolated from Triticum aestivum
Protein Group	Protein ID	Protein Accession	Peptide	Unique	-10lgP	Mass	Length	ppm	m/z	z	RT	Area
												Control-1	Antimycin A-1	NO2-1	GSNO-1	Control-2	Antimycin A-2	NO2-2	GSNO-2	Control-3	Antimycin A-3	NO2-3	Antimycin A-4	GSNO-3	Control-4	Antimycin A-5	NO2-4	GSNO-4	Control-5	Antimycin A-6	NO2-5	GSNO-5	Control-6	NO2-6	Antimycin A-7	NO2-7	GSNO-6	Control-7	Antimycin A-8	NO2-8	GSNO-7	Control-8	Antimycin A-9	NO2-9	GSNO-8	GSNO-9	Control-9	Antimycin A-10	NO2-10
188	402	O23715|PSA3_ARATH	M.S(+42.01)SIGTGYDLSVTTFSPDGR.V	Y	65.55	2000.93	19	2.3	1001.47	2	21.66													8140.6
4	4	P41378|IF4A_WHEAT	K.GLDVIQQAQ(+.98)SGTGK.T	Y	53.75	1401.71	14	5.3	701.862	2	16.44												0
142	356	P47999|CYSKP_ARATH	K.TPNSYMLQ(+.98)QFDNPANPK.I	Y	78.3	1964.89	17	1.7	983.451	2	18.68																32248
4	4	P41378|IF4A_WHEAT	K.GLDVIQQ(+.98)AQSGTGK.T	Y	51.09	1401.71	14	5.5	701.863	2	16.14												0
14	6	P22953|HS701_ARATH	K.VQQLLQ(+.98)DFFNGK.E	N	63.53	1436.73	12	-1.3	719.373	2	21.75																				52150
19	10	Q9LHA8|HS704_ARATH	K.VQQLLQ(+.98)DFFNGK.E	N	63.53	1436.73	12	-1.3	719.373	2	21.75																				52150
20	5	P22954|HS702_ARATH	K.VQQLLQ(+.98)DFFNGK.E	N	63.53	1436.73	12	-1.3	719.373	2	21.75																				52150
27	21	Q9C7X7|HSP7N_ARATH	K.VQQLLQ(+.98)DFFNGK.E	N	63.53	1436.73	12	-1.3	719.373	2	21.75																				52150
24	55	Q41629|ADT1_WHEAT	K.LLIQNQ(+.98)DEM(+15.99)IK.A	N	74.29	1360.69	11	0.9	681.353	2	15.9																		0
34	86	P31167|ADT1_ARATH	K.LLIQNQ(+.98)DEM(+15.99)IK.A	N	74.29	1360.69	11	0.9	681.353	2	15.9																		0
24	55	Q41629|ADT1_WHEAT	K.LLIQNQ(+.98)DEMIK.A	N	55.72	1344.7	11	5.7	673.355	2	17.71																					0
34	86	P31167|ADT1_ARATH	K.LLIQNQ(+.98)DEMIK.A	N	55.72	1344.7	11	5.7	673.355	2	17.71																					0
68	186	P46286|RL81_ARATH	R.AMIGQ(+.98)VAGGGR.T	Y	58.39	1016.51	11	6.4	509.262	2	14.15										0
106	142	Q9SS45|PAL4_ARATH	R.TSPQ(+.98)WLGPQIEVIR.A	N	52.31	1623.86	14	0.7	812.939	2	21.28																																						0
124	168	Q43210|PALY_WHEAT	R.TSPQ(+.98)WLGPQIEVIR.A	N	52.31	1623.86	14	0.7	812.939	2	21.28																																						0
124	228	P35510|PAL1_ARATH	R.TSPQ(+.98)WLGPQIEVIR.Y	N	52.31	1623.86	14	0.7	812.939	2	21.28																																						0
24	55	Q41629|ADT1_WHEAT	K.LLIQ(+.98)NQDEM(+15.99)IK.A	N	57.77	1360.69	11	-1.5	681.352	2	15.97
34	86	P31167|ADT1_ARATH	K.LLIQ(+.98)NQDEM(+15.99)IK.A	N	57.77	1360.69	11	-1.5	681.352	2	15.97
1	9	Q03033|EF1A_WHEAT	R.LPLQ(+.98)DVYK.I	N	63.18	975.528	8	5.4	488.774	2	17.15																																					0
3	61	Q8W4H7|EF1A2_ARATH	R.LPLQ(+.98)DVYK.I	N	63.18	975.528	8	5.4	488.774	2	17.15																																					0
3	62	Q0WL56|EF1A3_ARATH	R.LPLQ(+.98)DVYK.I	N	63.18	975.528	8	5.4	488.774	2	17.15																																					0
3	63	P0DH99|EF1A1_ARATH	R.LPLQ(+.98)DVYK.I	N	63.18	975.528	8	5.4	488.774	2	17.15																																					0
3	64	Q8GTY0|EF1A4_ARATH	R.LPLQ(+.98)DVYK.I	N	63.18	975.528	8	5.4	488.774	2	17.15																																					0
68	186	P46286|RL81_ARATH	R.LRGQ(+.98)AAASAAK.A	Y	54.59	1043.57	11	1.8	522.792	2	10.52																					0
39	205	Q08682|RSSA1_ARATH	K.FAQ(+.98)YTGANAIAGR.H	Y	75.92	1339.65	13	4.7	670.833	2	14.93			0											0
65	95	P57751|UGPA1_ARATH	K.VQ(+.98)LLEIAQVPDEHVNEFK.S	Y	54.77	2108.08	18	5.1	703.704	3	20.2																																				0
65	103	Q9M9P3|UGPA2_ARATH	K.VQ(+.98)LLEIAQVPDEHVNEFK.S	Y	54.77	2108.08	18	5.1	703.704	3	20.2																																				0
87	113	P25696|ENO2_ARATH	K.TYDLNFKEENNNGSQ(+.98)K.I	Y	54.39	1900.84	16	0.4	951.43	2	14.57
96	115	Q1W374|PMM_WHEAT	R.TVGHTVTSPNDTVQ(+.98)QC(+57.02)K.S	Y	63.82	1871.87	17	5.4	624.964	3	11.66													0
31	100	P22738|RL32_ARATH	K.Q(+.98)VPVDAIFQK.D	Y	66.05	1144.61	10	0	573.314	2	18.43
31	100	P22738|RL32_ARATH	K.Q(+.98)VPVDAIFQKDEMIDIIGVTK.G	Y	62.98	2359.23	21	-3	787.416	3	23.2																									0
175	118	Q9SGE0|AXS2_ARATH	R.Q(+.98)LAEMMTEVYAK.V	Y	68.04	1413.65	12	-0.4	707.833	2	19.13
175	124	Q9ZUY6|AXS1_ARATH	R.Q(+.98)LAEMMTEVYAK.V	Y	68.04	1413.65	12	-0.4	707.833	2	19.13
64	276	Q9LHP1|RL74_ARATH	R.Q(+.98)IFNGVFLK.V	N	50.89	1065.59	9	0.7	533.799	2	20.41																																		246460
82	394	P60040|RL72_ARATH	R.Q(+.98)IFNGVFLK.V	N	50.89	1065.59	9	0.7	533.799	2	20.41																																		246460
39	205	Q08682|RSSA1_ARATH	K.FAQYTGAN(+.98)AIAGR.H	Y	69.16	1339.65	13	0.4	670.83	2	14.78		0	0								0			0																				0
101	310	O82616|SCRK5_ARATH	K.APGGAPAN(+.98)VAC(+57.02)AITK.L	Y	53.64	1397.7	15	2.3	699.857	2	15.81																												15583
68	186	P46286|RL81_ARATH	R.SLDFGERN(+.98)GYLK.G	Y	66.89	1398.68	12	0.8	700.343	2	16.49																					177500
92	264	P41127|RL131_ARATH	K.HNNVIPN(+.98)GHFK.K	Y	80.14	1276.63	11	1.4	426.549	3	12.89				15784						7451											28364
1	9	Q03033|EF1A_WHEAT	R.GFVASN(+.98)SKDDPAK.E	Y	74.27	1335.63	13	1.6	668.82	2	11.99												155250
37	140	Q8VYK6|RS43_ARATH	K.GIPYLN(+.98)TYDGR.T	Y	76.45	1268.6	11	0.6	635.309	2	18.85																										0
37	169	P49204|RS42_ARATH	K.GIPYLN(+.98)TYDGR.T	Y	76.45	1268.6	11	0.6	635.309	2	18.85																										0
37	171	Q93VH9|RS41_ARATH	K.GIPYLN(+.98)TYDGR.T	Y	76.45	1268.6	11	0.6	635.309	2	18.85																										0
232	503	Q5E924|G3PP2_ARATH	K.VLPELN(+.98)GK.L	Y	50.58	869.486	8	4	435.752	2	15.6																										47117
232	527	Q9SAJ6|G3PP1_ARATH	K.VLPELN(+.98)GK.L	Y	50.58	869.486	8	4	435.752	2	15.6																										47117
8	69	Q9LIA8|UGDH2_ARATH	R.INAWN(+.98)SDTLPIYEPGLDDVVK.Q	Y	57.82	2359.16	21	-2.4	1180.58	2	22.72							3005.1
24	55	Q41629|ADT1_WHEAT	K.LLIQN(+.98)QDEM(+15.99)IK.A	N	72.59	1360.69	11	2.6	681.351	2	15.96										0
34	86	P31167|ADT1_ARATH	K.LLIQN(+.98)QDEM(+15.99)IK.A	N	72.59	1360.69	11	2.6	681.351	2	15.96										0
24	55	Q41629|ADT1_WHEAT	K.LLIQN(+.98)QDEMIK.A	N	63.5	1344.7	11	2.6	673.357	2	17.73																										0
34	86	P31167|ADT1_ARATH	K.LLIQN(+.98)QDEMIK.A	N	63.5	1344.7	11	2.6	673.357	2	17.73																										0
64	276	Q9LHP1|RL74_ARATH	R.QIFN(+.98)GVFLK.V	N	69.71	1065.59	9	1.6	533.798	2	20.4								253220					164250																					246460
82	394	P60040|RL72_ARATH	R.QIFN(+.98)GVFLK.V	N	69.71	1065.59	9	1.6	533.798	2	20.4								253220					164250																					246460
7	108	Q9FZE1|UGDH1_ARATH	K.LAAN(+.98)AFLAQR.I	N	63.09	1074.58	10	-3.9	538.294	2	17.86												0																					0
8	69	Q9LIA8|UGDH2_ARATH	K.LAAN(+.98)AFLAQR.I	N	63.09	1074.58	10	-3.9	538.294	2	17.86												0																					0
10	93	Q9FM01|UGDH4_ARATH	K.LAAN(+.98)AFLAQR.I	N	63.09	1074.58	10	-3.9	538.294	2	17.86												0																					0
28	291	O48549|RS61_ARATH	K.KGEN(+.98)DLPGLTDTEKPR.M	Y	89.57	1769.88	16	5.7	590.967	3	13.84				0				0		0								0			0													0
54	141	Q9FX54|G3PC2_ARATH	R.IGIN(+.98)GFGR.I	Y	62.57	833.439	8	2	417.726	2	16.62		90892				117080							69781			86299		42502																106910
54	162	P25858|G3PC1_ARATH	R.IGIN(+.98)GFGR.I	Y	62.57	833.439	8	2	417.726	2	16.62		90892				117080							69781			86299		42502																106910
138	255	O81149|PSA5A_ARATH	K.VTPN(+.98)NVDIAK.V	Y	57.96	1070.56	10	9.5	536.29	2	13.24
138	259	Q42134|PSA5B_ARATH	K.VTPN(+.98)NVDIAK.V	Y	57.96	1070.56	10	9.5	536.29	2	13.24
77	14	Q9SZN1|VATB2_ARATH	R.IFN(+.98)GSGKPIDNGPPILPEAYLDISGSSINPSER.T	N	88.59	3454.73	33	2.3	1152.58	3	22.33
78	19	Q8W4E2|VATB3_ARATH	R.IFN(+.98)GSGKPIDNGPPILPEAYLDISGSSINPSER.T	N	88.59	3454.73	33	2.3	1152.58	3	22.33
78	22	P11574|VATB1_ARATH	R.IFN(+.98)GSGKPIDNGPPILPEAYLDISGSSINPSER.T	N	88.59	3454.73	33	2.3	1152.58	3	22.33
250	448	O82399|MDHX1_ARATH	R.IQN(+.98)GGTEVVEAK.A	Y	52.74	1244.62	12	1.7	623.318	2	12.49						0
87	113	P25696|ENO2_ARATH	K.YGQDATNVGDEGGFAPNIQEN(+.98)KEGLELLK.T	Y	70.69	3106.47	29	7.1	1036.5	3	19.11
8	69	Q9LIA8|UGDH2_ARATH	R.IN(+.98)AWNSDTLPIYEPGLDDVVK.Q	Y	64.56	2359.16	21	-3.1	1180.58	2	22.67																									0							7431.1
175	118	Q9SGE0|AXS2_ARATH	R.AN(+.98)GHIFNVGNPN(+.98)NEVTVR.Q	Y	50.14	1952.93	18	-0.2	651.985	3	16.97
175	124	Q9ZUY6|AXS1_ARATH	R.AN(+.98)GHIFNVGNPN(+.98)NEVTVR.Q	Y	50.14	1952.93	18	-0.2	651.985	3	16.97
59	29	Q9MAH0|CAPP1_ARATH	R.GGGPTHLAILSQPPDTIN(+.98)GSLR.V	Y	74.89	2201.14	22	-3.4	734.72	3	18.74																	56204		21014			25590
5	8	P32112|SAHH_WHEAT	R.LYQMQESGTLLFPAINVN(+.98)DSVTK.S	Y	54.7	2568.28	23	0.5	1285.15	2	23.19																																				0
82	394	P60040|RL72_ARATH	R.NHYVEGGDAGNRENFIN(+.98)ELIR.R	Y	55.34	2417.14	21	7.6	605.294	4	15.86																																		75159
82	394	P60040|RL72_ARATH	R.NHYVEGGDAGNREN(+.98)FINELIR.R	Y	63.74	2417.14	21	6	806.721	3	15.86																																		114050
87	113	P25696|ENO2_ARATH	K.TYDLNFKEENNN(+.98)GSQK.I	Y	62.56	1900.84	16	2.6	634.621	3	14.41	7617.9																						17136
25	71	Q05855|PER1_WHEAT	R.DSTTASASLAN(+.98)SDLPGPSSSR.S	Y	65.5	2020.92	21	1.6	1011.46	2	15.35																					0
14	6	P22953|HS701_ARATH	K.VQQLLQDFFN(+.98)GK.E	N	53.12	1436.73	12	8.2	719.378	2	21.8																								88048											0
19	10	Q9LHA8|HS704_ARATH	K.VQQLLQDFFN(+.98)GK.E	N	53.12	1436.73	12	8.2	719.378	2	21.8																								88048											0
20	5	P22954|HS702_ARATH	K.VQQLLQDFFN(+.98)GK.E	N	53.12	1436.73	12	8.2	719.378	2	21.8																								88048											0
27	21	Q9C7X7|HSP7N_ARATH	K.VQQLLQDFFN(+.98)GK.E	N	53.12	1436.73	12	8.2	719.378	2	21.8																								88048											0
14	6	P22953|HS701_ARATH	K.VQQLLQDFFN(+.98)GKELC(+57.02)K.S	N	52.58	1966.98	16	-1.6	984.497	2	20.78																								10279
19	10	Q9LHA8|HS704_ARATH	K.VQQLLQDFFN(+.98)GKELC(+57.02)K.S	N	52.58	1966.98	16	-1.6	984.497	2	20.78																								10279
20	5	P22954|HS702_ARATH	K.VQQLLQDFFN(+.98)GKELC(+57.02)K.S	N	52.58	1966.98	16	-1.6	984.497	2	20.78																								10279
27	21	Q9C7X7|HSP7N_ARATH	K.VQQLLQDFFN(+.98)GKELC(+57.02)K.S	N	52.58	1966.98	16	-1.6	984.497	2	20.78																								10279
87	113	P25696|ENO2_ARATH	K.TYDLNFKEEN(+.98)NNGSQK.I	Y	56.4	1900.84	16	2.6	634.621	3	14.41																							27650
52	49	Q39043|BIP2_ARATH	K.N(+.98)GHVEIIANDQGNR.I	Y	56.21	1536.73	14	2.7	769.373	2	13.89
80	91	P23686|METK1_ARATH	K.N(+.98)GTC(+57.02)AWLRPDGK.T	Y	61.17	1374.63	12	2.3	688.323	2	16.25							40830																										15578
48	222	Q9LZH9|RL7A2_ARATH	K.N(+.98)EDKLEFSK.I	Y	53.41	1109.52	9	4.9	555.769	2	12.74				0
48	269	P49692|RL7A1_ARATH	K.N(+.98)EDKLEFSK.I	Y	53.41	1109.52	9	4.9	555.769	2	12.74				0
146	187	Q9FIB6|PS12A_ARATH	K.N(+.98)LSEIPDFK.M	Y	55.73	1062.52	9	-4.7	532.264	2	13.59			108620
76	39	P38076|CYSK_WHEAT	R.LVLTMPASM(+15.99)SMER.R	Y	58.37	1480.71	13	-1.3	741.357	2	19.03						32554
76	39	P38076|CYSK_WHEAT	R.LVLTMPASM(+15.99)SM(+15.99)ER.R	Y	74.03	1496.7	13	0.4	749.359	2	17.47						0																						0
81	27	Q9LZF6|CD48E_ARATH	R.VLNQLLTEM(+15.99)DGMNAK.K	N	75.31	1691.82	15	-3.6	846.915	2	17.64																	0
79	25	Q9SCN8|CD48D_ARATH	R.VLNQLLTEM(+15.99)DGMNAK.K	N	75.31	1691.82	15	-3.6	846.915	2	17.64																	0
24	55	Q41629|ADT1_WHEAT	K.LLIQNQDEM(+15.99)IK.A	N	94.89	1359.71	11	-0.1	680.857	2	15.48				910010						879610								773810			791450					1136400
34	86	P31167|ADT1_ARATH	K.LLIQNQDEM(+15.99)IK.A	N	94.89	1359.71	11	-0.1	680.857	2	15.48				910010						879610								773810			791450					1136400
49	116	Q9FWA3|6PGD2_ARATH	R.IGLAGLAVM(+15.99)GQNLALNIAEK.G	N	57.82	2011.11	20	-1.5	1006.56	2	23.09																									48749
60	125	Q9SH69|6PGD1_ARATH	R.IGLAGLAVM(+15.99)GQNLALNIAEK.G	N	57.82	2011.11	20	-1.5	1006.56	2	23.09																									48749
104	139	Q9FLF0|RS92_ARATH	R.QLVNIPSFM(+15.99)VR.V	Y	54.68	1318.71	11	-0.4	660.357	2	20.38
5	8	P32112|SAHH_WHEAT	K.DIIMVDHM(+15.99)R.K	Y	67.26	1144.54	9	-0.3	573.273	2	14.67															15488
16	137	Q96300|14337_ARATH	R.YEEMVEFM(+15.99)EK.V	N	70.35	1349.55	10	1.3	675.781	2	16.4										190360								157330			142700
22	148	P46077|14334_ARATH	R.YEEMVEFM(+15.99)EK.V	N	70.35	1349.55	10	1.3	675.781	2	16.4										190360								157330			142700
43	211	P42644|14333_ARATH	R.YEEMVEFM(+15.99)EK.V	N	70.35	1349.55	10	1.3	675.781	2	16.4										190360								157330			142700
5	8	P32112|SAHH_WHEAT	R.HSLPDGLM(+15.99)R.A	Y	68.56	1040.51	9	0.7	521.259	2	12.2
14	6	P22953|HS701_ARATH	R.ARFEELNM(+15.99)DLFR.K	N	60.33	1555.75	12	-1.7	519.588	3	18.28																																						0
19	10	Q9LHA8|HS704_ARATH	R.ARFEELNM(+15.99)DLFR.K	N	60.33	1555.75	12	-1.7	519.588	3	18.28																																						0
24	55	Q41629|ADT1_WHEAT	K.NFAIDFLM(+15.99)GGVSAAVSK.T	Y	52.96	1741.87	17	-0.5	871.938	2	23										4376.2
37	140	Q8VYK6|RS43_ARATH	K.FDVGNVVM(+15.99)VTGGR.N	Y	102.49	1365.67	13	0.1	683.84	2	18.49				218780						169790			0					185430			256160					299530
37	169	P49204|RS42_ARATH	K.FDVGNVVM(+15.99)VTGGR.N	Y	102.49	1365.67	13	0.1	683.84	2	18.49				218780						169790			0					185430			256160					299530
37	171	Q93VH9|RS41_ARATH	K.FDVGNVVM(+15.99)VTGGR.N	Y	102.49	1365.67	13	0.1	683.84	2	18.49				218780						169790			0					185430			256160					299530
152	395	Q95748|NDUS3_ARATH	R.VVSEPIEM(+15.99)TQEFR.Y	Y	67.61	1579.76	13	-0.1	790.881	2	15.97		91319	0								64243			41796
234	644	P34066|PSA1A_ARATH	R.LFQVEYAM(+15.99)EAVK.Q	Y	65.22	1442.71	12	-1.1	722.359	2	18.05						103330										62399												81574
234	748	O23712|PSA1B_ARATH	R.LFQVEYAM(+15.99)EAVK.Q	Y	65.22	1442.71	12	-1.1	722.359	2	18.05						103330										62399												81574
1	9	Q03033|EF1A_WHEAT	K.MIPTKPM(+15.99)VVETFATYPPLGR.F	Y	93.58	2263.17	20	-1.3	755.398	3	19.85					118820							102170													614340												34294
25	71	Q05855|PER1_WHEAT	K.NLNTVDM(+15.99)VALSGAHTIGK.A	Y	88.49	1855.95	18	1.3	928.977	2	16.85				196700						79025			10315					130360			151100					170750
18	12	Q9ZRB0|TBB3_WHEAT	R.YLTASAM(+15.99)FR.G	N	70.17	1074.52	9	0.1	538.266	2	15.58					0
36	15	Q9ZRB1|TBB2_WHEAT	R.YLTASAM(+15.99)FR.G	N	70.17	1074.52	9	0.1	538.266	2	15.58					0
38	20	P29516|TBB8_ARATH	R.YLTASAM(+15.99)FR.G	N	70.17	1074.52	9	0.1	538.266	2	15.58					0
30	13	Q9ZRA8|TBB5_WHEAT	R.YLTASAM(+15.99)FR.G	N	70.17	1074.52	9	0.1	538.266	2	15.58					0
30	16	Q9ZRB2|TBB1_WHEAT	R.YLTASAM(+15.99)FR.G	N	70.17	1074.52	9	0.1	538.266	2	15.58					0
81	27	Q9LZF6|CD48E_ARATH	K.GPELLTM(+15.99)WFGESEANVR.E	N	64.74	1950.91	17	-0.9	976.464	2	23.88																																28096
79	25	Q9SCN8|CD48D_ARATH	K.GPELLTM(+15.99)WFGESEANVR.E	N	64.74	1950.91	17	-0.9	976.464	2	23.88																																28096
42	28	P29514|TBB6_ARATH	R.YLTASAM(+15.99)FR.G	N	70.17	1074.52	9	0.1	538.266	2	15.58					0
77	14	Q9SZN1|VATB2_ARATH	K.TPVSLDM(+15.99)LGR.I	N	69.21	1103.56	10	1.3	552.788	2	16.65																							18749
78	19	Q8W4E2|VATB3_ARATH	K.TPVSLDM(+15.99)LGR.I	N	69.21	1103.56	10	1.3	552.788	2	16.65																							18749
78	22	P11574|VATB1_ARATH	K.TPVSLDM(+15.99)LGR.I	N	69.21	1103.56	10	1.3	552.788	2	16.65																							18749
100	68	Q9SIB9|ACO3M_ARATH	R.SDETVAM(+15.99)IEAYLR.A	Y	64.42	1512.71	13	-5.8	757.359	2	22.58																	23080					14069										34205
60	125	Q9SH69|6PGD1_ARATH	K.GLLYLGM(+15.99)GVSGGEEGAR.N	Y	84.89	1680.81	17	0.3	841.411	2	18.69												131130																					22201				41493
114	106	O04450|TCPE_ARATH	R.IAEGYEM(+15.99)ASR.V	Y	56.93	1141.51	10	2.2	571.759	2	11.93																		26625			49693
142	356	P47999|CYSKP_ARATH	K.TPNSYM(+15.99)LQ(+.98)QFDNPANPK.I	Y	57.42	1980.89	17	3.2	991.45	2	16.94						39217
233	390	Q9ZUT9|RS51_ARATH	R.LTNSLM(+15.99)M(+15.99)HGR.N	Y	51.89	1190.55	10	1.2	596.282	2	11.16									112900
233	391	P51427|RS52_ARATH	R.LTNSLM(+15.99)M(+15.99)HGR.N	Y	51.89	1190.55	10	1.2	596.282	2	11.16									112900
100	68	Q9SIB9|ACO3M_ARATH	R.SNLVGM(+15.99)GIIPLC(+57.02)FK.S	N	71.84	1563.82	14	-6	782.91	2	22.23
126	73	Q42560|ACO1_ARATH	R.SNLVGM(+15.99)GIIPLC(+57.02)FK.A	N	71.84	1563.82	14	-6	782.91	2	22.23
140	200	Q42669|ACOHC_CUCMC	R.SNLVGM(+15.99)GIIPLC(+57.02)FK.A	N	71.84	1563.82	14	-6	782.91	2	22.23
14	6	P22953|HS701_ARATH	R.FEELNM(+15.99)DLFR.K	N	63.84	1328.61	10	1.1	665.312	2	19.56																																			0
18	12	Q9ZRB0|TBB3_WHEAT	K.EVDEQM(+15.99)LNVQNK.N	N	69.99	1461.68	12	1.6	731.843	2	12.97							53079					159740
19	10	Q9LHA8|HS704_ARATH	R.FEELNM(+15.99)DLFR.K	N	63.84	1328.61	10	1.1	665.312	2	19.56																																			0
23	17	Q9ZRA9|TBB4_WHEAT	K.EVDEQM(+15.99)LNVQNK.N	N	69.99	1461.68	12	1.6	731.843	2	12.97							53079					159740
36	15	Q9ZRB1|TBB2_WHEAT	K.EVDEQM(+15.99)INVQNK.N	N	69.99	1461.68	12	1.6	731.843	2	12.97							53079					159740
38	20	P29516|TBB8_ARATH	K.EVDEQM(+15.99)INVQNK.N	N	69.99	1461.68	12	1.6	731.843	2	12.97							53079					159740
30	13	Q9ZRA8|TBB5_WHEAT	K.EVDEQM(+15.99)INVQNK.N	N	69.99	1461.68	12	1.6	731.843	2	12.97							53079					159740
30	16	Q9ZRB2|TBB1_WHEAT	K.EVDEQM(+15.99)INVQNK.N	N	69.99	1461.68	12	1.6	731.843	2	12.97							53079					159740
42	28	P29514|TBB6_ARATH	K.EVDEQM(+15.99)INVQNK.N	N	69.99	1461.68	12	1.6	731.843	2	12.97							53079					159740
59	29	Q9MAH0|CAPP1_ARATH	R.ALLDEM(+15.99)AVVATEEYR.S	Y	95.64	1724.83	15	-3.2	863.419	2	18.63																	40064
77	14	Q9SZN1|VATB2_ARATH	R.GYPGYM(+15.99)YTDLATIYER.A	N	79.49	1927.87	16	0.8	964.937	2	20.05																							20116
78	19	Q8W4E2|VATB3_ARATH	R.GYPGYM(+15.99)YTDLATIYER.A	N	79.49	1927.87	16	0.8	964.937	2	20.05																							20116
78	22	P11574|VATB1_ARATH	R.GYPGYM(+15.99)YTDLATIYER.A	N	79.49	1927.87	16	0.8	964.937	2	20.05																							20116
16	137	Q96300|14337_ARATH	K.DSTLIM(+15.99)QLLR.D	N	62.37	1204.65	10	1.1	603.332	2	22.83																										72455
22	148	P46077|14334_ARATH	K.DSTLIM(+15.99)QLLR.D	N	62.37	1204.65	10	1.1	603.332	2	22.83																										72455
43	211	P42644|14333_ARATH	K.DSTLIM(+15.99)QLLR.D	N	62.37	1204.65	10	1.1	603.332	2	22.83																										72455
43	211	P42644|14333_ARATH	R.EENVYM(+15.99)AK.L	Y	62.34	998.438	8	1	500.224	2	11.43				198690						77681								95501			200580
61	132	O23254|GLYC4_ARATH	R.IGAPAM(+15.99)TSR.G	Y	59.11	918.459	9	-1	460.235	2	11.32					95940
35	146	Q93VT9|RL101_ARATH	R.IYDVGM(+15.99)K.R	Y	55.38	840.405	7	-0.7	421.207	2	12.5									0		0			0
35	176	Q08770|RL102_ARATH	R.IYDVGM(+15.99)K.R	Y	55.38	840.405	7	-0.7	421.207	2	12.5									0		0			0
35	190	Q93W22|RL103_ARATH	R.IYDVGM(+15.99)K.R	Y	55.38	840.405	7	-0.7	421.207	2	12.5									0		0			0
97	107	Q6W8Q2|REHY_WHEAT	K.VTYPIM(+15.99)ADPDR.S	Y	56.2	1292.61	11	2.2	647.309	2	15.14		58410									0
95	258	P48348|14338_ARATH	K.DSTLIM(+15.99)QLLR.D	N	62.37	1204.65	10	1.1	603.332	2	22.83																										72455
95	277	P48349|14336_ARATH	K.DSTLIM(+15.99)QLLR.D	N	62.37	1204.65	10	1.1	603.332	2	22.83																										72455
154	220	P48347|14310_ARATH	K.DSTLIM(+15.99)QLLR.D	N	62.37	1204.65	10	1.1	603.332	2	22.83																										72455
44	138	P29546|EF1B_WHEAT	K.SSVLM(+15.99)DIKPWDDETDMK.K	Y	60.28	2024.91	17	0.3	675.976	3	18.85																					44956					30818
76	39	P38076|CYSK_WHEAT	R.LVLTM(+15.99)PASMSM(+15.99)ER.R	Y	53.08	1496.7	13	1.6	749.357	2	15.94																52346
58	42	P83483|ATPBM_ARATH	K.TVLIM(+15.99)ELIN(+.98)NVAK.A	Y	78.94	1473.81	13	0.7	737.911	2	20.65	0
58	43	P83484|ATPBN_ARATH	K.TVLIM(+15.99)ELIN(+.98)NVAK.A	Y	78.94	1473.81	13	0.7	737.911	2	20.65	0
58	47	Q9C5A9|ATPBO_ARATH	K.TVLIM(+15.99)ELIN(+.98)NVAK.A	Y	78.94	1473.81	13	0.7	737.911	2	20.65	0
58	42	P83483|ATPBM_ARATH	K.TVLIM(+15.99)ELINN(+.98)VAK.A	Y	50.25	1473.81	13	-1.3	737.909	2	20.75																							5922.5
58	43	P83484|ATPBN_ARATH	K.TVLIM(+15.99)ELINN(+.98)VAK.A	Y	50.25	1473.81	13	-1.3	737.909	2	20.75																							5922.5
58	47	Q9C5A9|ATPBO_ARATH	K.TVLIM(+15.99)ELINN(+.98)VAK.A	Y	50.25	1473.81	13	-1.3	737.909	2	20.75																							5922.5
5	8	P32112|SAHH_WHEAT	K.RLYQM(+15.99)QESGTLLFPAINVNDSVTK.S	Y	102.83	2739.39	24	1.4	914.135	3	20.34																							0
5	8	P32112|SAHH_WHEAT	R.ATDVM(+15.99)IAGK.V	Y	71.96	920.464	9	-0.5	461.237	2	12.27
18	12	Q9ZRB0|TBB3_WHEAT	R.LHFFM(+15.99)VGFAPLTSR.G	N	76.93	1637.84	14	0.3	546.952	3	21.43	3257.8														4181								15350													0		0
23	17	Q9ZRA9|TBB4_WHEAT	R.LHFFM(+15.99)VGFAPLTSR.G	N	76.93	1637.84	14	0.3	546.952	3	21.43	3257.8														4181								15350													0		0
36	15	Q9ZRB1|TBB2_WHEAT	R.LHFFM(+15.99)VGFAPLTSR.G	N	76.93	1637.84	14	0.3	546.952	3	21.43	3257.8														4181								15350													0		0
38	20	P29516|TBB8_ARATH	R.LHFFM(+15.99)VGFAPLTSR.G	N	76.93	1637.84	14	0.3	546.952	3	21.43	3257.8														4181								15350													0		0
30	13	Q9ZRA8|TBB5_WHEAT	R.LHFFM(+15.99)VGFAPLTSR.G	N	76.93	1637.84	14	0.3	546.952	3	21.43	3257.8														4181								15350													0		0
30	16	Q9ZRB2|TBB1_WHEAT	R.LHFFM(+15.99)VGFAPLTSR.G	N	76.93	1637.84	14	0.3	546.952	3	21.43	3257.8														4181								15350													0		0
76	39	P38076|CYSK_WHEAT	R.IGYSM(+15.99)ITDAEEK.G	N	72.8	1371.62	12	0.5	686.816	2	14.79						170140										92861												43143
21	11	O65719|HSP7C_ARATH	K.NQVAM(+15.99)NPINTVFDAK.R	Y	58.52	1676.82	15	0.3	839.417	2	19.13										0										49370																		34800
42	28	P29514|TBB6_ARATH	R.LHFFM(+15.99)VGFAPLTSR.G	N	76.93	1637.84	14	0.3	546.952	3	21.43	3257.8														4181								15350													0		0
7	108	Q9FZE1|UGDH1_ARATH	R.VVSSM(+15.99)FNTVSGK.K	Y	101.74	1270.62	12	1.2	636.316	2	13.69					164580		186110			0		309470											5360.4
7	108	Q9FZE1|UGDH1_ARATH	K.IFDNM(+15.99)QKPAFVFDGR.N	N	67.44	1799.87	15	-0.3	600.963	3	18.18					145530																												27214			9328.5
7	108	Q9FZE1|UGDH1_ARATH	R.VVSSM(+15.99)FNTVSGKK.I	Y	56.66	1398.72	13	1.5	700.364	2	12.33
58	42	P83483|ATPBM_ARATH	K.TVLIM(+15.99)ELINNVAK.A	Y	81.06	1472.83	13	-0.1	737.418	2	23.22																											18925
58	43	P83484|ATPBN_ARATH	K.TVLIM(+15.99)ELINNVAK.A	Y	81.06	1472.83	13	-0.1	737.418	2	23.22																											18925
58	47	Q9C5A9|ATPBO_ARATH	K.TVLIM(+15.99)ELINNVAK.A	Y	81.06	1472.83	13	-0.1	737.418	2	23.22																											18925
8	69	Q9LIA8|UGDH2_ARATH	K.IFDNM(+15.99)QKPAFVFDGR.N	N	67.44	1799.87	15	-0.3	600.963	3	18.18					145530																												27214			9328.5
64	276	Q9LHP1|RL74_ARATH	K.ATINM(+15.99)LR.R	Y	61.18	833.443	7	-0.9	417.726	2	12.93								839430					643320
142	356	P47999|CYSKP_ARATH	R.IGYSM(+15.99)ITDAEEK.G	N	72.8	1371.62	12	0.5	686.816	2	14.79						170140										92861												43143
185	180	Q9ZPS3|DCE4_ARATH	K.NYVDM(+15.99)DEYPVTTELQNR.C	Y	53.18	2101.93	17	3.7	1051.97	2	17.18
179	505	Q9LM59|GLYC6_ARATH	K.YSEGM(+15.99)PGAR.Y	Y	67.99	982.418	9	1	492.215	2	10.81					26949							120510
179	943	Q84WV0|GLYC7_ARATH	K.YSEGM(+15.99)PGAR.Y	Y	67.99	982.418	9	1	492.215	2	10.81					26949							120510
159	1337	Q8LD27|PSB6_ARATH	R.TSTGM(+15.99)YVANR.A	Y	71.29	1114.51	10	1.6	558.26	2	11.4		115340	119470								111930			68693
346	446	P24846|DAPA1_WHEAT	K.EVLPM(+15.99)GPTIIYNVPSR.T	Y	56.14	1800.94	16	-0.7	901.479	2	19.81																												10053
16	137	Q96300|14337_ARATH	R.YEEM(+15.99)VEFMEK.V	N	79.66	1349.55	10	0.6	675.78	2	16.37				144120						190360								157330			142700					118770
22	148	P46077|14334_ARATH	R.YEEM(+15.99)VEFMEK.V	N	79.66	1349.55	10	0.6	675.78	2	16.37				144120						190360								157330			142700					118770
43	211	P42644|14333_ARATH	R.YEEM(+15.99)VEFMEK.V	N	79.66	1349.55	10	0.6	675.78	2	16.37				144120						190360								157330			142700					118770
23	17	Q9ZRA9|TBB4_WHEAT	R.AVLM(+15.99)DLEPGTMDSVR.S	N	62.81	1648.78	15	-1.7	825.396	2	18.55												0
36	15	Q9ZRB1|TBB2_WHEAT	R.AVLM(+15.99)DLEPGTMDSVR.T	N	62.81	1648.78	15	-1.7	825.396	2	18.55												0
38	20	P29516|TBB8_ARATH	R.AVLM(+15.99)DLEPGTMDSVR.S	N	62.81	1648.78	15	-1.7	825.396	2	18.55												0
30	13	Q9ZRA8|TBB5_WHEAT	R.AVLM(+15.99)DLEPGTMDSVR.T	N	62.81	1648.78	15	-1.7	825.396	2	18.55												0
30	16	Q9ZRB2|TBB1_WHEAT	R.AVLM(+15.99)DLEPGTMDSVR.T	N	62.81	1648.78	15	-1.7	825.396	2	18.55												0
5	8	P32112|SAHH_WHEAT	K.DIIM(+15.99)VDHMR.K	Y	61.81	1144.54	9	1.5	573.275	2	15.11	25244
5	8	P32112|SAHH_WHEAT	R.LYQM(+15.99)QESGTLLFPAINVN(+.98)DSVTK.S	Y	74.24	2584.27	23	0.6	1293.14	2	22.32
5	8	P32112|SAHH_WHEAT	R.LYQM(+15.99)QESGTLLFPAIN(+.98)VNDSVTK.S	Y	64.04	2584.27	23	0.6	1293.14	2	22.18
5	8	P32112|SAHH_WHEAT	K.DIIM(+15.99)VDHM(+15.99)R.K	Y	53.1	1160.53	9	0.5	581.271	2	13.53
16	137	Q96300|14337_ARATH	R.YEEM(+15.99)VEFM(+15.99)EK.V	N	78.24	1365.55	10	0.6	683.778	2	14.51				108760						149220								146510			131200					75185
22	148	P46077|14334_ARATH	R.YEEM(+15.99)VEFM(+15.99)EK.V	N	78.24	1365.55	10	0.6	683.778	2	14.51				108760						149220								146510			131200					75185
43	211	P42644|14333_ARATH	R.YEEM(+15.99)VEFM(+15.99)EK.V	N	78.24	1365.55	10	0.6	683.778	2	14.51				108760						149220								146510			131200					75185
23	17	Q9ZRA9|TBB4_WHEAT	R.AVLM(+15.99)DLEPGTM(+15.99)DSVR.S	N	54.1	1664.77	15	0.1	833.392	2	16.96
36	15	Q9ZRB1|TBB2_WHEAT	R.AVLM(+15.99)DLEPGTM(+15.99)DSVR.T	N	54.1	1664.77	15	0.1	833.392	2	16.96
38	20	P29516|TBB8_ARATH	R.AVLM(+15.99)DLEPGTM(+15.99)DSVR.S	N	54.1	1664.77	15	0.1	833.392	2	16.96
30	13	Q9ZRA8|TBB5_WHEAT	R.AVLM(+15.99)DLEPGTM(+15.99)DSVR.T	N	54.1	1664.77	15	0.1	833.392	2	16.96
30	16	Q9ZRB2|TBB1_WHEAT	R.AVLM(+15.99)DLEPGTM(+15.99)DSVR.T	N	54.1	1664.77	15	0.1	833.392	2	16.96
128	78	P27323|HS901_ARATH	R.VFIM(+15.99)DNC(+57.02)EELIPEYLSFVK.G	Y	62.73	2361.13	19	-0.5	1181.57	2	24.63																																						22743
5	8	P32112|SAHH_WHEAT	R.LYQM(+15.99)QESGTLLFPAINVNDSVTK.S	Y	123.08	2583.29	23	-0.1	1292.65	2	21.83	26004														74693								168170				39302									40333
29	7	P12862|ATPAM_WHEAT	R.DNGM(+15.99)HALIIYDDLSK.Q	N	76.15	1719.81	15	0.3	574.277	3	18.52																							8224.2
41	24	Q9ZRB7|TBA_WHEAT	R.IHFM(+15.99)LSSYAPVISAEK.A	N	68.75	1807.92	16	0.9	904.962	2	19.36					12971
55	54	P29511|TBA6_ARATH	R.IHFM(+15.99)LSSYAPVISAEK.A	N	68.75	1807.92	16	0.9	904.962	2	19.36					12971
55	56	Q0WV25|TBA4_ARATH	R.IHFM(+15.99)LSSYAPVISAEK.A	N	68.75	1807.92	16	0.9	904.962	2	19.36					12971
55	57	B9DGT7|TBA2_ARATH	R.IHFM(+15.99)LSSYAPVISAEK.A	N	68.75	1807.92	16	0.9	904.962	2	19.36					12971
44	138	P29546|EF1B_WHEAT	R.SVQM(+15.99)EGLTWGASK.L	Y	96.55	1408.67	13	0.4	705.337	2	16.05				247740						301280								214320			329360					274540
58	42	P83483|ATPBM_ARATH	R.TIAM(+15.99)DGTEGLVR.G	Y	81.26	1277.63	12	0.3	639.819	2	14.78															13805								41242
58	43	P83484|ATPBN_ARATH	R.TIAM(+15.99)DGTEGLVR.G	Y	81.26	1277.63	12	0.3	639.819	2	14.78															13805								41242
58	47	Q9C5A9|ATPBO_ARATH	R.TIAM(+15.99)DGTEGLVR.G	Y	81.26	1277.63	12	0.3	639.819	2	14.78															13805								41242
111	76	Q940P8|TCPB_ARATH	K.IHPM(+15.99)TIIAGYR.M	Y	56.69	1286.68	11	0.1	644.345	2	15.05																																		40977
67	66	P92549|ATPAM_ARATH	R.DNGM(+15.99)HALIIYDDLSK.Q	N	76.15	1719.81	15	0.3	574.277	3	18.52																							8224.2
24	55	Q41629|ADT1_WHEAT	R.MMM(+15.99)TSGEAVK.Y	N	64.59	1099.47	10	2.5	550.742	2	11.79				77170						72465								39250
34	86	P31167|ADT1_ARATH	R.MMM(+15.99)TSGEAVK.Y	N	64.59	1099.47	10	2.5	550.742	2	11.79				77170						72465								39250
80	91	P23686|METK1_ARATH	K.TNM(+15.99)VM(+15.99)VFGEITTK.A	N	66.5	1501.72	13	-1.8	751.864	2	18.05
83	129	Q9LUT2|METK4_ARATH	K.TNM(+15.99)VM(+15.99)VFGEITTK.A	N	66.5	1501.72	13	-1.8	751.864	2	18.05
31	100	P22738|RL32_ARATH	K.DEM(+15.99)IDIIGVTK.G	N	89.43	1248.63	11	-3.8	625.318	2	18.85					35794		59538																								12356
31	100	P22738|RL32_ARATH	K.AGM(+15.99)THIVR.D	N	67.54	899.465	8	0.9	450.738	2	10.61					94776		173820
32	84	P17094|RL31_ARATH	K.DEM(+15.99)IDIIGVTK.G	N	89.43	1248.63	11	-3.8	625.318	2	18.85					35794		59538																								12356
32	84	P17094|RL31_ARATH	K.AGM(+15.99)THIVR.E	N	67.54	899.465	8	0.9	450.738	2	10.61					94776		173820
15	92	Q9FJA6|RS33_ARATH	R.FVM(+15.99)ESGAK.G	Y	67.65	883.411	8	0.5	442.711	2	11.14								0					70244																					83158
71	33	Q5GM68|CAPP2_ARATH	K.LTM(+15.99)FHGR.G	N	55.04	876.428	7	-3.6	439.219	2	11.22																	3705.1
71	33	Q5GM68|CAPP2_ARATH	R.AGM(+15.99)SYFHETIWK.G	N	53.86	1484.68	12	-4.4	743.342	2	16.95																	21233
59	29	Q9MAH0|CAPP1_ARATH	K.LTM(+15.99)FHGR.G	N	55.04	876.428	7	-3.6	439.219	2	11.22																	3705.1
59	29	Q9MAH0|CAPP1_ARATH	R.AGM(+15.99)SYFHETIWK.G	N	53.86	1484.68	12	-4.4	743.342	2	16.95																	21233
96	115	Q1W374|PMM_WHEAT	R.SGM(+15.99)INVSPIGR.N	Y	80.93	1145.59	11	0.8	573.799	2	15.21								92043					56207																					83352
61	132	O23254|GLYC4_ARATH	R.AGM(+15.99)IFYR.K	N	53.09	872.421	7	0.1	437.216	2	14.9					48297
47	231	P49693|RL193_ARATH	R.VLM(+15.99)ESIHK.S	Y	68.94	971.511	8	0.8	486.761	2	11.46		557940	459150					269160	215360				154320	0																				210790
47	292	Q9SRX2|RL191_ARATH	R.VLM(+15.99)ESIHK.S	Y	68.94	971.511	8	0.8	486.761	2	11.46		557940	459150					269160	215360				154320	0																				210790
199	224	P0DH91|ARF2B_ARATH	R.ILM(+15.99)VGLDAAGK.T	Y	63.11	1102.61	11	0.4	552.308	2	17.09
199	225	Q9LQC8|ARF2A_ARATH	R.ILM(+15.99)VGLDAAGK.T	Y	63.11	1102.61	11	0.4	552.308	2	17.09
199	227	P36397|ARF1_ARATH	R.ILM(+15.99)VGLDAAGK.T	Y	63.11	1102.61	11	0.4	552.308	2	17.09
168	213	P93033|FUM1_ARATH	K.VNM(+15.99)EYGLDPTIGK.A	Y	61.46	1451.7	13	0.4	726.853	2	16.31												89959
134	509	Q9SVM4|GLYC5_ARATH	R.AGM(+15.99)IFYR.K	N	53.09	872.421	7	0.1	437.216	2	14.9					48297
41	24	Q9ZRB7|TBA_WHEAT	K.AYHEQLSVAEITNSAFEPSSMM(+15.99)AK.C	Y	54.29	2656.21	24	1.6	886.41	3	19.17															0
56	41	P55737|HS902_ARATH	K.TM(+15.99)EINPENSIMDELR.K	N	52.64	1806.81	15	-2.4	904.411	2	19.2																								5541.9
57	38	O03986|HS904_ARATH	K.TM(+15.99)EINPENSIMDELR.K	N	52.64	1806.81	15	-2.4	904.411	2	19.2																								5541.9
24	55	Q41629|ADT1_WHEAT	R.MM(+15.99)M(+15.99)TSGEAVK.Y	N	62.35	1115.47	10	1.6	558.738	2	11.18																		205150			307120
34	86	P31167|ADT1_ARATH	R.MM(+15.99)M(+15.99)TSGEAVK.Y	N	62.35	1115.47	10	1.6	558.738	2	11.18																		205150			307120
24	55	Q41629|ADT1_WHEAT	R.MM(+15.99)MTSGEAVK.Y	N	71.96	1099.47	10	2	550.741	2	12.44										152670											168670
34	86	P31167|ADT1_ARATH	R.MM(+15.99)MTSGEAVK.Y	N	71.96	1099.47	10	2	550.741	2	12.44										152670											168670
48	222	Q9LZH9|RL7A2_ARATH	R.KM(+15.99)EVPYC(+57.02)IVK.G	Y	61.71	1281.65	10	-0.5	641.827	2	14.76				211140						229640								201980			328790
48	269	P49692|RL7A1_ARATH	R.KM(+15.99)EVPYC(+57.02)IVK.G	Y	61.71	1281.65	10	-0.5	641.827	2	14.76				211140						229640								201980			328790
1	9	Q03033|EF1A_WHEAT	K.QM(+15.99)IC(+57.02)C(+57.02)C(+57.02)NK.M	N	52.34	1128.42	8	2	565.216	2	10.76												20879
3	61	Q8W4H7|EF1A2_ARATH	K.QM(+15.99)IC(+57.02)C(+57.02)C(+57.02)NK.M	N	52.34	1128.42	8	2	565.216	2	10.76												20879
3	62	Q0WL56|EF1A3_ARATH	K.QM(+15.99)IC(+57.02)C(+57.02)C(+57.02)NK.M	N	52.34	1128.42	8	2	565.216	2	10.76												20879
3	63	P0DH99|EF1A1_ARATH	K.QM(+15.99)IC(+57.02)C(+57.02)C(+57.02)NK.M	N	52.34	1128.42	8	2	565.216	2	10.76												20879
3	64	Q8GTY0|EF1A4_ARATH	K.QM(+15.99)IC(+57.02)C(+57.02)C(+57.02)NK.M	N	52.34	1128.42	8	2	565.216	2	10.76												20879
1	9	Q03033|EF1A_WHEAT	K.NM(+15.99)ITGTSQADC(+57.02)AVLIIDSTTGGFEAGISK.D	N	89.82	2972.41	29	-7	1487.2	2	22.78						2276.7				959.09
3	61	Q8W4H7|EF1A2_ARATH	K.NM(+15.99)ITGTSQADC(+57.02)AVLIIDSTTGGFEAGISK.D	N	89.82	2972.41	29	-7	1487.2	2	22.78						2276.7				959.09
3	62	Q0WL56|EF1A3_ARATH	K.NM(+15.99)ITGTSQADC(+57.02)AVLIIDSTTGGFEAGISK.D	N	89.82	2972.41	29	-7	1487.2	2	22.78						2276.7				959.09
3	63	P0DH99|EF1A1_ARATH	K.NM(+15.99)ITGTSQADC(+57.02)AVLIIDSTTGGFEAGISK.D	N	89.82	2972.41	29	-7	1487.2	2	22.78						2276.7				959.09
3	64	Q8GTY0|EF1A4_ARATH	K.NM(+15.99)ITGTSQADC(+57.02)AVLIIDSTTGGFEAGISK.D	N	89.82	2972.41	29	-7	1487.2	2	22.78						2276.7				959.09
4	4	P41378|IF4A_WHEAT	K.FM(+15.99)NKPVR.I	Y	59.96	906.475	7	2.3	454.243	2	10.7												57570
29	7	P12862|ATPAM_WHEAT	R.QM(+15.99)SLLLR.R	N	61.28	875.49	7	0	438.75	2	16.07
17	81	O50008|METE1_ARATH	K.GM(+15.99)LTGPVTILNWSFVR.N	Y	101.34	1805.95	16	-1.5	903.981	2	24.82																				16440															17329			163340
15	92	Q9FJA6|RS33_ARATH	K.IM(+15.99)LDWDPK.G	Y	57.55	1032.49	8	0.9	517.253	2	18.47								301150					190840					48177
44	138	P29546|EF1B_WHEAT	K.LM(+15.99)PVGYGIK.K	Y	59.63	992.536	9	1.5	497.274	2	15.63				386010						463490								301370								573800
44	138	P29546|EF1B_WHEAT	K.LM(+15.99)PVGYGIKK.L	Y	51.19	1120.63	10	1.1	561.321	2	13.5				48382																	49139
58	42	P83483|ATPBM_ARATH	R.EM(+15.99)IESGVIK.L	Y	66.37	1020.52	9	1.1	511.264	2	13.79																							17300
58	43	P83484|ATPBN_ARATH	R.EM(+15.99)IESGVIK.L	Y	66.37	1020.52	9	1.1	511.264	2	13.79																							17300
58	47	Q9C5A9|ATPBO_ARATH	R.EM(+15.99)IESGVIK.L	Y	66.37	1020.52	9	1.1	511.264	2	13.79																							17300
51	58	Q9ASR1|EF2_ARATH	R.NM(+15.99)SVIAHVDHGK.S	Y	50.2	1322.64	12	-4.5	441.885	3	11.18																						2454.2
67	66	P92549|ATPAM_ARATH	R.QM(+15.99)SLLLR.R	N	61.28	875.49	7	0	438.75	2	16.07
67	66	P92549|ATPAM_ARATH	R.KM(+15.99)ELDAFLK.E	Y	60.48	1109.58	9	1.1	555.795	2	16.6
68	186	P46286|RL81_ARATH	R.AM(+15.99)IGQVAGGGR.T	Y	100.55	1031.52	11	0.2	516.764	2	12.12				683090				17450		656700	27338			19777				470460			768550
211	335	P42795|RL111_ARATH	K.AM(+15.99)QLLESGLK.V	Y	70.69	1104.58	10	1	553.298	2	15.78									98978
211	341	P42794|RL112_ARATH	K.AM(+15.99)QLLESGLK.V	Y	70.69	1104.58	10	1	553.298	2	15.78									98978
18	12	Q9ZRB0|TBB3_WHEAT	R.MM(+15.99)LTFSVFPSPK.V	N	61.62	1399.69	12	0.5	700.852	2	22.09																							31218													22420
23	17	Q9ZRA9|TBB4_WHEAT	R.MM(+15.99)LTFSVFPSPK.V	N	61.62	1399.69	12	0.5	700.852	2	22.09																							31218													22420
36	15	Q9ZRB1|TBB2_WHEAT	R.MM(+15.99)LTFSVFPSPK.V	N	61.62	1399.69	12	0.5	700.852	2	22.09																							31218													22420
38	20	P29516|TBB8_ARATH	R.MM(+15.99)LTFSVFPSPK.V	N	61.62	1399.69	12	0.5	700.852	2	22.09																							31218													22420
30	13	Q9ZRA8|TBB5_WHEAT	R.MM(+15.99)LTFSVFPSPK.V	N	61.62	1399.69	12	0.5	700.852	2	22.09																							31218													22420
30	16	Q9ZRB2|TBB1_WHEAT	R.MM(+15.99)LTFSVFPSPK.V	N	61.62	1399.69	12	0.5	700.852	2	22.09																							31218													22420
42	28	P29514|TBB6_ARATH	R.MM(+15.99)LTFSVFPSPK.V	N	61.62	1399.69	12	0.5	700.852	2	22.09																							31218													22420
77	14	Q9SZN1|VATB2_ARATH	R.TYPEEMIQTGISTIDVM(+15.99)NSIAR.G	N	53.59	2484.19	22	1.7	1243.1	2	21.79																							3104.9
78	19	Q8W4E2|VATB3_ARATH	R.TYPEEMIQTGISTIDVM(+15.99)NSIAR.G	N	53.59	2484.19	22	1.7	1243.1	2	21.79																							3104.9
78	22	P11574|VATB1_ARATH	R.TYPEEMIQTGISTIDVM(+15.99)NSIAR.G	N	53.59	2484.19	22	1.7	1243.1	2	21.79																							3104.9
25	71	Q05855|PER1_WHEAT	R.NFASNAAAFSSAFTTAM(+15.99)IK.M	Y	56.66	1964.93	19	2.3	983.47	2	21.25				0
16	137	Q96300|14337_ARATH	K.LAEQAERYEEMVEFM(+15.99)EK.V	N	67.96	2146.96	17	0.8	716.656	3	17.6				56331														58538			58685					95213
22	148	P46077|14334_ARATH	K.LAEQAERYEEMVEFM(+15.99)EK.V	N	67.96	2146.96	17	0.8	716.656	3	17.6				56331														58538			58685					95213
43	211	P42644|14333_ARATH	K.LAEQAERYEEMVEFM(+15.99)EK.V	N	67.96	2146.96	17	0.8	716.656	3	17.6				56331														58538			58685					95213
4	4	P41378|IF4A_WHEAT	R.GRDHTVSATHGDM(+15.99)DQNTR.D	Y	87.96	2012.87	18	1.3	504.223	4	10.37					167110
81	27	Q9LZF6|CD48E_ARATH	R.VLNQLLTEMDGM(+15.99)NAK.K	N	65.88	1691.82	15	-9.4	846.916	2	19.58																	22453		18042
79	25	Q9SCN8|CD48D_ARATH	R.VLNQLLTEMDGM(+15.99)NAK.K	N	65.88	1691.82	15	-9.4	846.916	2	19.58																	22453		18042
29	7	P12862|ATPAM_WHEAT	R.VYGLNEIQAGEM(+15.99)VEFASGVK.G	Y	57.65	2156.05	20	2.3	1079.03	2	19.99																																				5195
185	180	Q9ZPS3|DCE4_ARATH	K.EAAYQIINDELM(+15.99)LDGNPR.L	Y	60.04	2076.98	18	1.8	1039.49	2	20.84
23	17	Q9ZRA9|TBB4_WHEAT	R.AVLMDLEPGTM(+15.99)DSVR.S	N	57.68	1648.78	15	-0.5	825.394	2	18.64															26078
36	15	Q9ZRB1|TBB2_WHEAT	R.AVLMDLEPGTM(+15.99)DSVR.T	N	57.68	1648.78	15	-0.5	825.394	2	18.64															26078
38	20	P29516|TBB8_ARATH	R.AVLMDLEPGTM(+15.99)DSVR.S	N	57.68	1648.78	15	-0.5	825.394	2	18.64															26078
30	13	Q9ZRA8|TBB5_WHEAT	R.AVLMDLEPGTM(+15.99)DSVR.T	N	57.68	1648.78	15	-0.5	825.394	2	18.64															26078
30	16	Q9ZRB2|TBB1_WHEAT	R.AVLMDLEPGTM(+15.99)DSVR.T	N	57.68	1648.78	15	-0.5	825.394	2	18.64															26078
16	137	Q96300|14337_ARATH	K.LAEQAERYEEM(+15.99)VEFM(+15.99)EK.V	N	80.47	2162.95	17	1.1	721.988	3	15.88				123010						106480								197780			332800					160360
22	148	P46077|14334_ARATH	K.LAEQAERYEEM(+15.99)VEFM(+15.99)EK.V	N	80.47	2162.95	17	1.1	721.988	3	15.88				123010						106480								197780			332800					160360
43	211	P42644|14333_ARATH	K.LAEQAERYEEM(+15.99)VEFM(+15.99)EK.V	N	80.47	2162.95	17	1.1	721.988	3	15.88				123010						106480								197780			332800					160360
189	1247	Q38858|CALR2_ARATH	K.KFGGDTPYSIM(+15.99)FGPDIC(+57.02)GYSTK.K	Y	52.28	2456.1	22	0.1	819.705	3	19.36
4	4	P41378|IF4A_WHEAT	R.DHTVSATHGDM(+15.99)DQNTR.D	Y	96.61	1799.75	16	2.6	600.922	3	10.48					92806		42348					147840	5528.4
18	12	Q9ZRB0|TBB3_WHEAT	R.ALTVPELTQQM(+15.99)WDSK.N	N	55.19	1761.86	15	0.5	881.935	2	18.69
41	24	Q9ZRB7|TBA_WHEAT	R.AFVHWYVGEGM(+15.99)EEGEFSEAR.E	N	61.36	2345.01	20	-7.9	782.671	3	18.45															3573.4			1437.5		3834.1
42	28	P29514|TBB6_ARATH	R.ALTVPELTQQM(+15.99)WDSK.N	N	55.19	1761.86	15	0.5	881.935	2	18.69
55	54	P29511|TBA6_ARATH	R.AFVHWYVGEGM(+15.99)EEGEFSEAR.E	N	61.36	2345.01	20	-7.9	782.671	3	18.45															3573.4			1437.5		3834.1
55	56	Q0WV25|TBA4_ARATH	R.AFVHWYVGEGM(+15.99)EEGEFSEAR.E	N	61.36	2345.01	20	-7.9	782.671	3	18.45															3573.4			1437.5		3834.1
55	57	B9DGT7|TBA2_ARATH	R.AFVHWYVGEGM(+15.99)EEGEFSEAR.E	N	61.36	2345.01	20	-7.9	782.671	3	18.45															3573.4			1437.5		3834.1
84	74	Q56WH1|TBA3_ARATH	R.AFVHWYVGEGM(+15.99)EEGEFSEAR.E	N	61.36	2345.01	20	-7.9	782.671	3	18.45															3573.4			1437.5		3834.1
84	75	B9DHQ0|TBA5_ARATH	R.AFVHWYVGEGM(+15.99)EEGEFSEAR.E	N	61.36	2345.01	20	-7.9	782.671	3	18.45															3573.4			1437.5		3834.1
144	99	P11139|TBA1_ARATH	R.AFVHWYVGEGM(+15.99)EEGEFSEAR.E	N	61.36	2345.01	20	-7.9	782.671	3	18.45															3573.4			1437.5		3834.1
5	8	P32112|SAHH_WHEAT	R.LELELAEVEM(+15.99)PGLMAC(+57.02)R.T	Y	54.15	1975.94	17	3.3	988.981	2	21.58
4	4	P41378|IF4A_WHEAT	K.MFVLDEADEM(+15.99)LSR.G	Y	63.55	1570.7	13	3.5	786.357	2	19.62					67255							45281						0															12418				18145
5	8	P32112|SAHH_WHEAT	R.LELELAEVEM(+15.99)PGLM(+15.99)AC(+57.02)R.T	Y	57.27	1991.94	17	1.2	996.973	2	20.37
4	4	P41378|IF4A_WHEAT	K.IQVGVFSATM(+15.99)PPEALEITR.K	Y	66.96	2074.08	19	-0.8	1038.04	2	21.53					16738							3063.9													49012
1	9	Q03033|EF1A_WHEAT	R.VETGVIKPGM(+15.99)VVTFGPTGLTTEVK.S	Y	89.92	2475.33	24	-1.2	826.116	3	19.79					215510							101850			26636										405130											13051	80394
14	6	P22953|HS701_ARATH	K.NALENYAYNM(+15.99)R.N	N	57.07	1373.6	11	-2.6	687.807	2	15.79																				5991.3				4386.1
19	10	Q9LHA8|HS704_ARATH	K.NALENYAYNM(+15.99)R.N	N	57.07	1373.6	11	-2.6	687.807	2	15.79																				5991.3				4386.1
20	5	P22954|HS702_ARATH	K.NALENYAYNM(+15.99)R.N	N	57.07	1373.6	11	-2.6	687.807	2	15.79																				5991.3				4386.1
12	31	P53494|ACT4_ARATH	K.EITALAPSSM(+15.99)K.I	N	57.53	1162.59	11	1.9	582.303	2	14.38						138310				53921								78108										179690
12	32	P53497|ACT12_ARATH	K.EITALAPSSM(+15.99)K.I	N	57.53	1162.59	11	1.9	582.303	2	14.38						138310				53921								78108										179690
26	26	P53496|ACT11_ARATH	K.EITALAPSSM(+15.99)K.I	N	57.53	1162.59	11	1.9	582.303	2	14.38						138310				53921								78108										179690
33	37	P53492|ACT7_ARATH	K.EITALAPSSM(+15.99)K.I	N	57.53	1162.59	11	1.9	582.303	2	14.38						138310				53921								78108										179690
21	11	O65719|HSP7C_ARATH	K.NALENYAYNM(+15.99)R.N	N	57.07	1373.6	11	-2.6	687.807	2	15.79																				5991.3				4386.1
94	94	P46274|VDAC1_WHEAT	K.ASALIQHEFM(+15.99)PK.S	Y	72.63	1386.7	12	1	694.354	2	14.8																										60681								85216
39	205	Q08682|RSSA1_ARATH	R.HTPGTFTNQM(+15.99)QTSFSEPR.L	Y	110.7	2080.93	18	1.2	694.648	3	13.81		114470	132920	47642		31142		151930	92461	44498	115020		153660	57906		22536		51294			62816							7913.1						182430
200	252	Q9SN86|MDHP_ARATH	K.AGAGSATLSM(+15.99)AYAAAR.F	Y	63.19	1483.71	16	0	742.858	2	15.03						0										55684
24	55	Q41629|ADT1_WHEAT	R.M(+15.99)M(+15.99)MTSGEAVK.Y	N	74.55	1115.47	10	1.9	558.739	2	11.18				350820						246640								205150			307120
34	86	P31167|ADT1_ARATH	R.M(+15.99)M(+15.99)MTSGEAVK.Y	N	74.55	1115.47	10	1.9	558.739	2	11.18				350820						246640								205150			307120
1	9	Q03033|EF1A_WHEAT	K.M(+15.99)IPTKPMVVETFATYPPLGR.F	Y	90.27	2263.17	20	0.5	755.395	3	20.23					187330							102170											28094														41052
4	4	P41378|IF4A_WHEAT	K.M(+15.99)FVLDEADEMLSR.G	Y	109.01	1570.7	13	0	786.354	2	20.66					60188							15479													115060								5095.9
24	55	Q41629|ADT1_WHEAT	R.M(+15.99)MM(+15.99)TSGEAVK.Y	N	68.58	1115.47	10	1.9	558.739	2	11.17				350820														205150
34	86	P31167|ADT1_ARATH	R.M(+15.99)MM(+15.99)TSGEAVK.Y	N	68.58	1115.47	10	1.9	558.739	2	11.17				350820														205150
24	55	Q41629|ADT1_WHEAT	R.M(+15.99)MMTSGEAVK.Y	N	68.3	1099.47	10	1.3	550.741	2	12.42				193710						152670								101400			168670
34	86	P31167|ADT1_ARATH	R.M(+15.99)MMTSGEAVK.Y	N	68.3	1099.47	10	1.3	550.741	2	12.42				193710						152670								101400			168670
18	12	Q9ZRB0|TBB3_WHEAT	R.M(+15.99)MLTFSVFPSPK.V	N	82.13	1399.69	12	-3.9	700.851	2	22.09					13459										14010												9299									22420	5366.8	0
23	17	Q9ZRA9|TBB4_WHEAT	R.M(+15.99)MLTFSVFPSPK.V	N	82.13	1399.69	12	-3.9	700.851	2	22.09					13459										14010												9299									22420	5366.8	0
36	15	Q9ZRB1|TBB2_WHEAT	R.M(+15.99)MLTFSVFPSPK.V	N	82.13	1399.69	12	-3.9	700.851	2	22.09					13459										14010												9299									22420	5366.8	0
38	20	P29516|TBB8_ARATH	R.M(+15.99)MLTFSVFPSPK.V	N	82.13	1399.69	12	-3.9	700.851	2	22.09					13459										14010												9299									22420	5366.8	0
30	13	Q9ZRA8|TBB5_WHEAT	R.M(+15.99)MLTFSVFPSPK.V	N	82.13	1399.69	12	-3.9	700.851	2	22.09					13459										14010												9299									22420	5366.8	0
30	16	Q9ZRB2|TBB1_WHEAT	R.M(+15.99)MLTFSVFPSPK.V	N	82.13	1399.69	12	-3.9	700.851	2	22.09					13459										14010												9299									22420	5366.8	0
42	28	P29514|TBB6_ARATH	R.M(+15.99)MLTFSVFPSPK.V	N	82.13	1399.69	12	-3.9	700.851	2	22.09					13459										14010												9299									22420	5366.8	0
1	9	Q03033|EF1A_WHEAT	K.M(+15.99)IPTKPM(+15.99)VVETFATYPPLGR.F	Y	72.96	2279.17	20	-2	760.729	3	19.34					216910							105860																									59405
4	4	P41378|IF4A_WHEAT	K.M(+15.99)FVLDEADEM(+15.99)LSR.G	Y	59.46	1586.7	13	0.5	794.351	2	18.19					109170
267	299	Q9LXC0|GDI_ARATH	M(+15.99)(+42.01)DEEYDVIVLGTGLK.E	Y	59.13	1738.83	15	-0.2	870.424	2	23.56																									15988												3634.6
48	222	Q9LZH9|RL7A2_ARATH	K.M(+15.99)EVPYC(+57.02)IVK.G	Y	52.86	1153.55	9	0	577.78	2	16.49										60260
48	269	P49692|RL7A1_ARATH	K.M(+15.99)EVPYC(+57.02)IVK.G	Y	52.86	1153.55	9	0	577.78	2	16.49										60260
35	146	Q93VT9|RL101_ARATH	K.M(+15.99)LSC(+57.02)AGADR.L	Y	70.34	995.416	9	1	498.714	2	10.97		163860	103670						112790		109220			94814
35	176	Q08770|RL102_ARATH	K.M(+15.99)LSC(+57.02)AGADR.L	Y	70.34	995.416	9	1	498.714	2	10.97		163860	103670						112790		109220			94814
35	190	Q93W22|RL103_ARATH	K.M(+15.99)LSC(+57.02)AGADR.L	Y	70.34	995.416	9	1	498.714	2	10.97		163860	103670						112790		109220			94814
14	6	P22953|HS701_ARATH	R.M(+15.99)VNHFVQEFK.R	N	57.99	1293.62	10	-8.7	647.812	2	14.76																				21586
25	71	Q05855|PER1_WHEAT	K.M(+15.99)GNIAPLTGTQGQIR.L	Y	100.08	1571.81	15	0.5	786.909	2	15.74				426570						240010								334040			302560					285860		5391.2
19	10	Q9LHA8|HS704_ARATH	R.M(+15.99)VNHFVQEFK.R	N	57.99	1293.62	10	-8.7	647.812	2	14.76																				21586
20	5	P22954|HS702_ARATH	R.M(+15.99)VNHFVQEFK.R	N	57.99	1293.62	10	-8.7	647.812	2	14.76																				21586
29	7	P12862|ATPAM_WHEAT	R.M(+15.99)TNFYTNFQVDEIGR.V	Y	102.33	1849.83	15	1	925.92	2	19.69	6631.4																						13087
27	21	Q9C7X7|HSP7N_ARATH	R.M(+15.99)VNHFVQEFK.R	N	57.99	1293.62	10	-8.7	647.812	2	14.76																				21586
21	11	O65719|HSP7C_ARATH	R.M(+15.99)VNHFVQEFK.R	N	57.99	1293.62	10	-8.7	647.812	2	14.76																				21586
46	149	Q8LRM8|TCTP_WHEAT	M(+15.99)LVYQDK.L	Y	59.18	911.442	7	1.3	456.727	2	12.5		163170							100690		180800			110040
65	95	P57751|UGPA1_ARATH	K.M(+15.99)EIIPNPK.E	Y	66.82	956.5	8	2.4	479.257	2	14.29	10828											186320			6355.2								14341
65	103	Q9M9P3|UGPA2_ARATH	K.M(+15.99)EIIPNPK.E	Y	66.82	956.5	8	2.4	479.257	2	14.29	10828											186320			6355.2								14341
151	147	P92963|RAB1C_ARATH	R.M(+15.99)ITIDNKPIK.L	Y	58.5	1187.66	10	0.9	594.836	2	13.58
120	154	P93819|MDHC1_ARATH	K.M(+15.99)ELIDAAFPLLK.G	Y	73.64	1375.74	12	1	688.879	2	23.39																												10670
139	1877	Q9LRX8|R13A2_ARATH	R.M(+15.99)VIPDALK.V	Y	57.28	901.494	8	-0.1	451.752	2	16.04			66533						454510					323790
139	4291	Q9FKC0|R13A4_ARATH	R.M(+15.99)VIPDALK.V	Y	57.28	901.494	8	-0.1	451.752	2	16.04			66533						454510					323790
139	5446	Q9SVR0|R13A3_ARATH	R.M(+15.99)VIPDALK.V	Y	57.28	901.494	8	-0.1	451.752	2	16.04			66533						454510					323790
307	400	Q00218|AROG_ARATH	R.M(+15.99)AGQFAKPR.S	Y	53.86	1020.52	9	0.3	511.264	2	10.98
307	609	P29976|AROF_ARATH	R.M(+15.99)AGQFAKPR.S	Y	53.86	1020.52	9	0.3	511.264	2	10.98
339	1078	Q9SWW6|CESA7_ARATH	M(+42.01)EASAGLVAGSHNR.N	Y	56.65	1440.68	14	0.1	721.343	2	16.24
94	94	P46274|VDAC1_WHEAT	M.G(+42.01)GPGLYSGIGKK.A	Y	57.86	1174.63	12	0.8	588.322	2	15.66				29409						26177
5	8	P32112|SAHH_WHEAT	K.SKFDNLYGC(+57.02)R.H	Y	62.18	1258.58	10	0.9	630.294	2	13.78	18222														6211.6								37391
157	131	Q9SRZ6|ICDHC_ARATH	K.SEGGYVWAC(+57.02)K.N	N	56.73	1155.5	10	0.3	578.758	2	15.65
163	183	Q9SLK0|ICDHX_ARATH	K.SEGGYVWAC(+57.02)K.N	N	56.73	1155.5	10	0.3	578.758	2	15.65
252	254	Q9SV21|COPB1_ARATH	K.VLPEMILIC(+57.02)QNLR.N	Y	59.1	1597.87	13	0.1	799.942	2	23.04
252	256	Q9SV20|COPB2_ARATH	K.VLPEMILIC(+57.02)QNLR.N	Y	59.1	1597.87	13	0.1	799.942	2	23.04
368	4489	Q9C5M0|DTC_ARATH	K.FYSGFPVYC(+57.02)VR.I	Y	58.92	1393.65	11	1.8	697.829	2	20.02																					38048
169	563	Q8W593|LGUC_ARATH	R.GPTPEPLC(+57.02)QVM(+15.99)LR.V	Y	71.08	1512.74	13	-0.2	757.375	2	17.81						132750																						202960
41	24	Q9ZRB7|TBA_WHEAT	R.TIQFVDWC(+57.02)PTGFK.C	N	76.7	1597.76	13	-0.1	799.883	2	21.7	6083.7				35175
55	54	P29511|TBA6_ARATH	R.TIQFVDWC(+57.02)PTGFK.C	N	76.7	1597.76	13	-0.1	799.883	2	21.7	6083.7				35175
55	56	Q0WV25|TBA4_ARATH	R.TIQFVDWC(+57.02)PTGFK.C	N	76.7	1597.76	13	-0.1	799.883	2	21.7	6083.7				35175
55	57	B9DGT7|TBA2_ARATH	R.TIQFVDWC(+57.02)PTGFK.C	N	76.7	1597.76	13	-0.1	799.883	2	21.7	6083.7				35175
8	69	Q9LIA8|UGDH2_ARATH	R.ETPAIDVC(+57.02)K.G	N	82.89	1031.5	9	-0.4	516.755	2	14.06				24738	378240		240830					646150													2081.8			5449.6						0
10	93	Q9FM01|UGDH4_ARATH	R.ETPAIDVC(+57.02)K.G	N	82.89	1031.5	9	-0.4	516.755	2	14.06				24738	378240		240830					646150													2081.8			5449.6						0
111	76	Q940P8|TCPB_ARATH	K.IIGHGINC(+57.02)FVNR.Q	Y	81.56	1398.72	12	1.3	467.245	3	15.51				28782																	81729					48891
128	78	P27323|HS901_ARATH	R.RVFIMDNC(+57.02)EELIPEYLSFVK.G	Y	80.85	2501.23	20	-0.3	834.751	3	23.66																																						17772
97	107	Q6W8Q2|REHY_WHEAT	K.LSFLYPSC(+57.02)TGR.N	Y	65.28	1299.63	11	1.5	650.821	2	19.74		18583	11413								22065			11733
144	99	P11139|TBA1_ARATH	R.TIQFVDWC(+57.02)PTGFK.C	N	76.7	1597.76	13	-0.1	799.883	2	21.7	6083.7				35175
226	230	Q93VR3|GME_ARATH	R.EKAPAAFC(+57.02)R.K	Y	57.94	1048.51	9	0.2	525.261	2	11.91							18549
143	451	Q9C4Z6|GPLPB_ARATH	K.LWNTLGEC(+57.02)K.Y	Y	73.17	1119.54	9	-0.3	560.774	2	16.44						431620										313680		32154										266940
143	604	Q9LV28|GPLPC_ARATH	K.LWNTLGEC(+57.02)K.Y	Y	73.17	1119.54	9	-0.3	560.774	2	16.44						431620										313680		32154										266940
143	739	O24456|GBLPA_ARATH	K.LWNTLGEC(+57.02)K.Y	Y	73.17	1119.54	9	-0.3	560.774	2	16.44						431620										313680		32154										266940
169	563	Q8W593|LGUC_ARATH	R.GPTPEPLC(+57.02)QVMLR.V	Y	97.57	1496.75	13	-1	749.377	2	19.44						109510										93715												151050
142	356	P47999|CYSKP_ARATH	K.LEIMEPC(+57.02)C(+57.02)SVK.D	Y	58.35	1364.61	11	2.4	683.316	2	16.9																												15567
76	39	P38076|CYSK_WHEAT	K.LESMEPC(+57.02)SSVKDR.I	Y	53.79	1536.69	13	1.9	769.351	2	12.43						3284.5
76	39	P38076|CYSK_WHEAT	K.LESMEPC(+57.02)SSVK.D	Y	51.22	1265.56	11	1.8	633.787	2	13.43						72156
111	76	Q940P8|TCPB_ARATH	R.VDEIITC(+57.02)APR.R	Y	80.82	1172.59	10	2	587.299	2	15.35				52704						51146											109350
128	78	P27323|HS901_ARATH	R.VFIMDNC(+57.02)EELIPEYLSFVK.G	Y	68.33	2345.13	19	0.2	1173.57	2	25.5																																						23179
48	222	Q9LZH9|RL7A2_ARATH	R.KMEVPYC(+57.02)IVK.G	Y	78.61	1265.65	10	0.7	633.83	2	16.43				135360						114400								0			237510					184870
48	269	P49692|RL7A1_ARATH	R.KMEVPYC(+57.02)IVK.G	Y	78.61	1265.65	10	0.7	633.83	2	16.43				135360						114400								0			237510					184870
129	134	F4HQD4|HSP7P_ARATH	R.ETPAIVC(+57.02)FGDK.Q	Y	77.04	1235.59	11	-8.1	618.799	2	17.52																	12217		0			9972.7
129	135	Q9S7C0|HSP7O_ARATH	R.ETPAIVC(+57.02)FGDK.Q	Y	77.04	1235.59	11	-8.1	618.799	2	17.52																	12217		0			9972.7
145	101	Q10MQ2|DAPAT_ORYSJ	R.TDIIFFC(+57.02)SPNNPTGAAASR.D	Y	68.37	2037.96	19	-0.7	1019.99	2	20.61							5177.4																							7332.4
127	243	Q96327|EBP1_ARATH	K.VAAAYDC(+57.02)K.I	Y	65.27	896.406	8	1	449.209	2	11.18						27181	13341					23507				11985
193	143	Q9LTX9|HSP7G_ARATH	R.GKFEELC(+57.02)SDLLDR.V	Y	51.94	1580.75	13	0.4	791.383	2	18.22																																						4060.5
216	413	P20115|CISY4_ARATH	R.GLSIPEC(+57.02)QK.V	Y	60.87	1030.51	9	1.8	516.262	2	14.6							61336
226	230	Q93VR3|GME_ARATH	K.LATEELC(+57.02)K.H	Y	62.42	962.474	8	0.5	482.242	2	13.01					58954		72184					63362
354	4365	Q9LF09|CSLAB_ARATH	K.LSIGAAC(+57.02)R.L	Y	50.58	846.438	8	-5.9	424.224	2	14.01
5	8	P32112|SAHH_WHEAT	K.NNAIVC(+57.02)NIGHFDNEIDM(+15.99)N(+.98)GLETYPGVK.R	Y	59.11	3050.38	27	3.6	1017.8	3	19.72
56	41	P55737|HS902_ARATH	R.VVDSPC(+57.02)C(+57.02)LVTGEYGWTANMER.I	N	59.45	2443.06	21	-1.6	1222.54	2	20.4																																						8768.4
57	38	O03986|HS904_ARATH	R.VVDSPC(+57.02)C(+57.02)LVTGEYGWTANMER.I	N	59.45	2443.06	21	-1.6	1222.54	2	20.4																																						8768.4
4	4	P41378|IF4A_WHEAT	R.GIVPFC(+57.02)K.G	Y	73.7	819.431	7	-1.1	410.722	2	17.15					54611							106860																		7378.2	10384		18855
18	12	Q9ZRB0|TBB3_WHEAT	K.FWEVIC(+57.02)DEHGIDQTGK.Y	Y	53.51	1932.87	16	7	645.298	3	18.16																							0
41	24	Q9ZRB7|TBA_WHEAT	K.EIVDLC(+57.02)LDR.I	N	76.47	1131.56	9	1	566.785	2	18.31					59852							109860																									46346
36	15	Q9ZRB1|TBB2_WHEAT	K.FWEVVC(+57.02)DEHGIDPTGR.Y	N	58.83	1915.85	16	0.6	639.623	3	18.3																							291.62
30	13	Q9ZRA8|TBB5_WHEAT	K.FWEVVC(+57.02)DEHGIDPTGR.Y	N	58.83	1915.85	16	0.6	639.623	3	18.3																							291.62
30	16	Q9ZRB2|TBB1_WHEAT	K.FWEVVC(+57.02)DEHGIDPTGR.Y	N	58.83	1915.85	16	0.6	639.623	3	18.3																							291.62
79	25	Q9SCN8|CD48D_ARATH	K.AIANEC(+57.02)QANFISIK.G	Y	69.76	1577.79	14	-2.6	789.899	2	17.8
42	28	P29514|TBB6_ARATH	K.FWEVVC(+57.02)DEHGIDPTGR.Y	N	58.83	1915.85	16	0.6	639.623	3	18.3																							291.62
55	54	P29511|TBA6_ARATH	K.EIVDLC(+57.02)LDR.I	N	76.47	1131.56	9	1	566.785	2	18.31					59852							109860																									46346
55	56	Q0WV25|TBA4_ARATH	K.EIVDLC(+57.02)LDR.I	N	76.47	1131.56	9	1	566.785	2	18.31					59852							109860																									46346
55	57	B9DGT7|TBA2_ARATH	K.EIVDLC(+57.02)LDR.I	N	76.47	1131.56	9	1	566.785	2	18.31					59852							109860																									46346
51	58	Q9ASR1|EF2_ARATH	R.GFVQFC(+57.02)YEPIK.Q	Y	65.94	1386.66	11	-4.9	694.336	2	19.81																	32369															4968.9
84	74	Q56WH1|TBA3_ARATH	K.EIVDLC(+57.02)LDR.V	N	76.47	1131.56	9	1	566.785	2	18.31					59852							109860																									46346
84	75	B9DHQ0|TBA5_ARATH	K.EIVDLC(+57.02)LDR.V	N	76.47	1131.56	9	1	566.785	2	18.31					59852							109860																									46346
93	236	O81147|PSA6B_ARATH	R.GKDSVC(+57.02)VVTQK.K	Y	95.55	1219.62	11	1.2	610.817	2	11.46								107930					77073																					0
48	222	Q9LZH9|RL7A2_ARATH	K.MEVPYC(+57.02)IVK.G	Y	66.05	1137.56	9	0.6	569.786	2	18.34										61302								40881								66434
48	269	P49692|RL7A1_ARATH	K.MEVPYC(+57.02)IVK.G	Y	66.05	1137.56	9	0.6	569.786	2	18.34										61302								40881								66434
196	265	Q9LDV4|ALAT2_ARATH	K.GYYGEC(+57.02)GKR.G	Y	55.76	1088.47	9	4.4	545.242	2	10.86												4683.7
150	253	P49040|SUS1_ARATH	K.LGVTQC(+57.02)TIAHALEK.T	Y	58.44	1539.81	14	-2.6	770.909	2	16.79																								8688.1
150	308	Q9LXL5|SUS4_ARATH	K.LGVTQC(+57.02)TIAHALEK.T	Y	58.44	1539.81	14	-2.6	770.909	2	16.79																								8688.1
222	338	Q8RWV0|TKTC1_ARATH	R.NLSQQC(+57.02)LNALAK.V	Y	57.42	1358.7	12	-3.1	680.354	2	16.14																								5969.5
222	599	F4IW47|TKTC2_ARATH	R.NLSQQC(+57.02)LNALAK.A	Y	57.42	1358.7	12	-3.1	680.354	2	16.14																								5969.5
364	2613	Q9LM02|SMT1_ARATH	K.VLDVGC(+57.02)GIGGPLR.E	Y	53.47	1311.7	13	-0.9	656.855	2	18.55																												0
266	529	Q39243|TRXB1_ARATH	R.GISAC(+57.02)AVC(+57.02)DGAAPIFR.N	Y	68.98	1663.78	16	-0.6	832.897	2	18.86																10725												54626
266	613	Q39242|TRXB2_ARATH	R.GISAC(+57.02)AVC(+57.02)DGAAPIFR.N	Y	68.98	1663.78	16	-0.6	832.897	2	18.86																10725												54626
5	8	P32112|SAHH_WHEAT	K.VAVVC(+57.02)GYGDVGK.G	Y	93.67	1222.6	12	0.4	612.306	2	14.94	50569																						74429
25	71	Q05855|PER1_WHEAT	K.QTVSC(+57.02)ADILTVAAR.D	Y	100.51	1503.77	14	-1.2	752.888	2	18.46				310570						227670								385290			285480					187830
24	55	Q41629|ADT1_WHEAT	K.GIGDC(+57.02)FGR.T	N	80.95	880.386	8	0	441.198	2	14.59				225030						251660								209590			232900					273890
34	86	P31167|ADT1_ARATH	K.GIGDC(+57.02)FGR.T	N	80.95	880.386	8	0	441.198	2	14.59				225030						251660								209590			232900					273890
135	46	Q9LKJ3|PHSH_WHEAT	R.AQQIC(+57.02)AVLYPGDATEEGK.L	Y	51.07	1948.92	18	0.1	975.467	2	17.72
117	67	O24396|PURA_WHEAT	R.GIGPC(+57.02)YSSK.V	N	61.88	967.443	9	-0.8	484.726	2	12.6					0
165	90	Q1XIR9|HGL1A_WHEAT	K.LASSC(+57.02)DIMGLNYYTSR.F	N	52.06	1849.83	16	-1.6	925.923	2	19.45
127	243	Q96327|EBP1_ARATH	K.IVDIC(+57.02)EK.G	Y	62.91	875.442	7	-0.6	438.726	2	13.49					0	26893						83859																9863
181	114	D5MTF8|HGL1D_WHEAT	K.LASSC(+57.02)DIMGLNYYTSR.F	N	52.06	1849.83	16	-1.6	925.923	2	19.45
198	360	Q9LFF9|IPYR4_ARATH	K.IIAVC(+57.02)ADDPEYR.H	Y	80.08	1420.67	12	-1.7	711.335	2	15.9														0
262	535	Q6T7E8|PURA_TOBAC	R.GIGPC(+57.02)YSSK.V	N	61.88	967.443	9	-0.8	484.726	2	12.6					0
153	306	Q43199|APT1_WHEAT	K.VVEC(+57.02)AC(+57.02)VIELPELK.G	Y	75.36	1657.84	14	-0.3	829.924	2	20.69			6417						8578.3		19701
1	9	Q03033|EF1A_WHEAT	K.QMIC(+57.02)C(+57.02)C(+57.02)NK.M	N	74.08	1112.42	8	1.6	557.217	2	11.56												80831
3	61	Q8W4H7|EF1A2_ARATH	K.QMIC(+57.02)C(+57.02)C(+57.02)NK.M	N	74.08	1112.42	8	1.6	557.217	2	11.56												80831
3	62	Q0WL56|EF1A3_ARATH	K.QMIC(+57.02)C(+57.02)C(+57.02)NK.M	N	74.08	1112.42	8	1.6	557.217	2	11.56												80831
3	63	P0DH99|EF1A1_ARATH	K.QMIC(+57.02)C(+57.02)C(+57.02)NK.M	N	74.08	1112.42	8	1.6	557.217	2	11.56												80831
3	64	Q8GTY0|EF1A4_ARATH	K.QMIC(+57.02)C(+57.02)C(+57.02)NK.M	N	74.08	1112.42	8	1.6	557.217	2	11.56												80831
41	24	Q9ZRB7|TBA_WHEAT	K.YMAC(+57.02)C(+57.02)LMYR.G	N	53.57	1266.5	9	2.1	634.256	2	16.99												28613
55	54	P29511|TBA6_ARATH	K.YMAC(+57.02)C(+57.02)LMYR.G	N	53.57	1266.5	9	2.1	634.256	2	16.99												28613
55	56	Q0WV25|TBA4_ARATH	K.YMAC(+57.02)C(+57.02)LMYR.G	N	53.57	1266.5	9	2.1	634.256	2	16.99												28613
55	57	B9DGT7|TBA2_ARATH	K.YMAC(+57.02)C(+57.02)LMYR.G	N	53.57	1266.5	9	2.1	634.256	2	16.99												28613
84	74	Q56WH1|TBA3_ARATH	K.YMAC(+57.02)C(+57.02)LMYR.G	N	53.57	1266.5	9	2.1	634.256	2	16.99												28613
84	75	B9DHQ0|TBA5_ARATH	K.YMAC(+57.02)C(+57.02)LMYR.G	N	53.57	1266.5	9	2.1	634.256	2	16.99												28613
144	99	P11139|TBA1_ARATH	K.YMAC(+57.02)C(+57.02)LMYR.G	N	53.57	1266.5	9	2.1	634.256	2	16.99												28613
176	430	Q93VG5|RS81_ARATH	R.LLAC(+57.02)ISSRPGQC(+57.02)GR.A	Y	53.87	1573.78	14	1.4	525.599	3	13.92																		18325			51013
4	4	P41378|IF4A_WHEAT	K.VHAC(+57.02)VGGTSVR.E	Y	107.01	1141.57	11	0.9	571.788	2	11.26					70170		30473					200490
18	12	Q9ZRB0|TBB3_WHEAT	K.NMMC(+57.02)AADPR.H	N	56.75	1064.42	9	1.7	533.216	2	13.09												20121
23	17	Q9ZRA9|TBB4_WHEAT	K.NMMC(+57.02)AADPR.H	N	56.75	1064.42	9	1.7	533.216	2	13.09												20121
36	15	Q9ZRB1|TBB2_WHEAT	K.NMMC(+57.02)AADPR.H	N	56.75	1064.42	9	1.7	533.216	2	13.09												20121
38	20	P29516|TBB8_ARATH	K.NMMC(+57.02)AADPR.H	N	56.75	1064.42	9	1.7	533.216	2	13.09												20121
30	13	Q9ZRA8|TBB5_WHEAT	K.NMMC(+57.02)AADPR.H	N	56.75	1064.42	9	1.7	533.216	2	13.09												20121
30	16	Q9ZRB2|TBB1_WHEAT	K.NMMC(+57.02)AADPR.H	N	56.75	1064.42	9	1.7	533.216	2	13.09												20121
31	100	P22738|RL32_ARATH	R.KVAC(+57.02)IGAWHPAR.V	N	99.12	1364.71	12	1.2	455.91	3	13.39					78669
32	84	P17094|RL31_ARATH	R.KVAC(+57.02)IGAWHPAR.V	N	99.12	1364.71	12	1.2	455.91	3	13.39					78669
42	28	P29514|TBB6_ARATH	K.NMMC(+57.02)AADPR.H	N	56.75	1064.42	9	1.7	533.216	2	13.09												20121
61	132	O23254|GLYC4_ARATH	K.LLIC(+57.02)GGSAYPR.D	Y	93.69	1205.62	11	1.5	603.817	2	16.17	12648				119950							390200											19359		4266.8											5211.1	89408
35	146	Q93VT9|RL101_ARATH	K.MLSC(+57.02)AGADR.L	Y	77.76	979.422	9	1.4	490.717	2	11.73		254460	135060					15961	96814		202630		19660	72601							0
35	176	Q08770|RL102_ARATH	K.MLSC(+57.02)AGADR.L	Y	77.76	979.422	9	1.4	490.717	2	11.73		254460	135060					15961	96814		202630		19660	72601							0
35	190	Q93W22|RL103_ARATH	K.MLSC(+57.02)AGADR.L	Y	77.76	979.422	9	1.4	490.717	2	11.73		254460	135060					15961	96814		202630		19660	72601							0
175	118	Q9SGE0|AXS2_ARATH	R.VLAC(+57.02)FSNNLLR.R	Y	84.39	1305.69	11	-1.4	653.85	2	19.47							23745																								7271.7		16800
175	124	Q9ZUY6|AXS1_ARATH	R.VLAC(+57.02)FSNNLLR.R	Y	84.39	1305.69	11	-1.4	653.85	2	19.47							23745																								7271.7		16800
123	389	Q94AH9|FBRL2_ARATH	R.DHAC(+57.02)VVGGYR.M	Y	74.45	1132.51	10	4.1	567.261	2	12.24						17392
123	396	Q9FEF8|FBRL1_ARATH	R.DHAC(+57.02)VVGGYR.M	Y	74.45	1132.51	10	4.1	567.261	2	12.24						17392
366	3605	O65041|UBA3_ARATH	K.FPLC(+57.02)TLAETPR.N	Y	54.47	1303.66	11	1.4	652.835	2	18.87					40702
41	24	Q9ZRB7|TBA_WHEAT	R.AVC(+57.02)M(+15.99)ISNSTSVVEVFSR.I	Y	60.54	1900.9	17	3.4	951.457	2	19.42					0
1	9	Q03033|EF1A_WHEAT	K.YYC(+57.02)TVIDAPGHR.D	N	126.85	1450.67	12	-0.3	726.337	2	14.43	2742.2		23237	81521	714290	0	102230		13957			1216900		10401				42817			81038				6275.3	21487		4018.4					4488.9	78674
3	61	Q8W4H7|EF1A2_ARATH	K.YYC(+57.02)TVIDAPGHR.D	N	126.85	1450.67	12	-0.3	726.337	2	14.43	2742.2		23237	81521	714290	0	102230		13957			1216900		10401				42817			81038				6275.3	21487		4018.4					4488.9	78674
3	62	Q0WL56|EF1A3_ARATH	K.YYC(+57.02)TVIDAPGHR.D	N	126.85	1450.67	12	-0.3	726.337	2	14.43	2742.2		23237	81521	714290	0	102230		13957			1216900		10401				42817			81038				6275.3	21487		4018.4					4488.9	78674
3	63	P0DH99|EF1A1_ARATH	K.YYC(+57.02)TVIDAPGHR.D	N	126.85	1450.67	12	-0.3	726.337	2	14.43	2742.2		23237	81521	714290	0	102230		13957			1216900		10401				42817			81038				6275.3	21487		4018.4					4488.9	78674
3	64	Q8GTY0|EF1A4_ARATH	K.YYC(+57.02)TVIDAPGHR.D	N	126.85	1450.67	12	-0.3	726.337	2	14.43	2742.2		23237	81521	714290	0	102230		13957			1216900		10401				42817			81038				6275.3	21487		4018.4					4488.9	78674
41	24	Q9ZRB7|TBA_WHEAT	R.AVC(+57.02)MISNSTSVVEVFSR.I	Y	75.34	1884.91	17	0.8	943.457	2	20.76					37437	7673.3																	126330														5195.5
31	100	P22738|RL32_ARATH	K.VAC(+57.02)IGAWHPAR.V	N	109.5	1236.62	11	-0.2	619.316	2	15.07					36098		167950					59061																			7946.9		70934
32	84	P17094|RL31_ARATH	K.VAC(+57.02)IGAWHPAR.V	N	109.5	1236.62	11	-0.2	619.316	2	15.07					36098		167950					59061																			7946.9		70934
15	92	Q9FJA6|RS33_ARATH	R.GLC(+57.02)AIAQAESLR.Y	Y	100.68	1287.66	12	-0.4	644.835	2	17.45								398820		20352			259850					65717			71855								86384					433650
15	92	Q9FJA6|RS33_ARATH	R.RAC(+57.02)YGVLR.F	Y	73.02	993.518	8	0.3	497.764	2	12.65								342550																										212820
13	157	P41916|RAN1_ARATH	R.FYC(+57.02)WDTAGQEK.F	Y	96.03	1403.58	11	0.6	702.795	2	16.53		9216.2		97272				163440		85533			39563					98958			249940					95252			10171					76456
13	158	P41917|RAN2_ARATH	R.FYC(+57.02)WDTAGQEK.F	Y	96.03	1403.58	11	0.6	702.795	2	16.53		9216.2		97272				163440		85533			39563					98958			249940					95252			10171					76456
13	159	Q8H156|RAN3_ARATH	R.FYC(+57.02)WDTAGQEK.F	Y	96.03	1403.58	11	0.6	702.795	2	16.53		9216.2		97272				163440		85533			39563					98958			249940					95252			10171					76456
94	94	P46274|VDAC1_WHEAT	K.SLC(+57.02)TISAEVDTK.A	Y	71.71	1322.64	12	0.6	662.327	2	15.6										70772								66842			0					83070
125	152	Q9ZP06|MDHM1_ARATH	K.NLC(+57.02)TAIAK.Y	Y	54.71	889.469	8	-4.2	445.74	2	13.9
126	73	Q42560|ACO1_ARATH	K.KAC(+57.02)DLGLEVKPWIK.T	Y	58.37	1655.91	14	-2.4	552.975	3	17.58
109	156	Q9C5U3|PRS8A_ARATH	K.AVC(+57.02)TEAGMFALR.E	Y	51.67	1324.63	12	-0.1	663.321	2	18.96
109	164	Q94BQ2|PRS8B_ARATH	K.AVC(+57.02)TEAGMFALR.E	Y	51.67	1324.63	12	-0.1	663.321	2	18.96
51	58	Q9ASR1|EF2_ARATH	R.NC(+57.02)DPN(+.98)GPLMLYVSK.M	Y	64.97	1607.73	14	-4.6	804.87	2	20.04
51	58	Q9ASR1|EF2_ARATH	R.NC(+57.02)DPN(+.98)GPLM(+15.99)LYVSK.M	Y	55.7	1623.73	14	-9.8	812.868	2	18.55																			15305
116	627	Q42564|APX3_ARATH	K.NC(+57.02)APIM(+15.99)LR.L	Y	73.99	989.479	8	0.6	495.745	2	15.15								332600										59308			86432													199340
116	1633	Q7XZP5|APX5_ARATH	R.NC(+57.02)APIM(+15.99)LR.L	Y	73.99	989.479	8	0.6	495.745	2	15.15								332600										59308			86432													199340
129	134	F4HQD4|HSP7P_ARATH	R.GC(+57.02)ALQC(+57.02)AILSPTFK.V	Y	80.87	1564.77	14	-4.2	783.391	2	19.75																	25187					14344										4091.5
129	135	Q9S7C0|HSP7O_ARATH	R.GC(+57.02)ALQC(+57.02)AILSPTFK.V	Y	80.87	1564.77	14	-4.2	783.391	2	19.75																	25187					14344										4091.5
13	157	P41916|RAN1_ARATH	R.VC(+57.02)ENIPIVLC(+57.02)GNK.V	Y	99.57	1514.76	13	-0.3	758.384	2	18.56				0					38215	0								87308			0					86308			46093					189850
13	157	P41916|RAN1_ARATH	R.VC(+57.02)ENIPIVLC(+57.02)GNKVDVK.N	Y	55.01	1956.02	17	2.8	653.011	3	18.33																					26404
13	158	P41917|RAN2_ARATH	R.VC(+57.02)ENIPIVLC(+57.02)GNK.V	Y	99.57	1514.76	13	-0.3	758.384	2	18.56				0					38215	0								87308			0					86308			46093					189850
13	158	P41917|RAN2_ARATH	R.VC(+57.02)ENIPIVLC(+57.02)GNKVDVK.N	Y	55.01	1956.02	17	2.8	653.011	3	18.33																					26404
13	159	Q8H156|RAN3_ARATH	R.VC(+57.02)ENIPIVLC(+57.02)GNK.V	Y	99.57	1514.76	13	-0.3	758.384	2	18.56				0					38215	0								87308			0					86308			46093					189850
13	159	Q8H156|RAN3_ARATH	R.VC(+57.02)ENIPIVLC(+57.02)GNKVDVK.N	Y	55.01	1956.02	17	2.8	653.011	3	18.33																					26404
15	92	Q9FJA6|RS33_ARATH	K.GC(+57.02)EVIVSGK.L	Y	98.72	947.475	9	0	474.742	2	12.72								283150					147690					43459																154870
15	92	Q9FJA6|RS33_ARATH	R.AC(+57.02)YGVLR.F	Y	94.92	837.417	7	1.6	419.715	2	14.3								319690					128110					28428			31170													169360
135	46	Q9LKJ3|PHSH_WHEAT	R.FC(+57.02)NPELSEIVTK.W	Y	65.01	1435.7	12	0.4	718.858	2	18.38
22	148	P46077|14334_ARATH	K.IC(+57.02)DGILK.L	Y	60.58	817.437	7	-1.5	409.723	2	14.83				1007500						976070			99225					834060			1175400					1355900								104670
87	113	P25696|ENO2_ARATH	K.SC(+57.02)NALLLK.V	Y	82.74	917.5	8	-0.1	459.756	2	15.96	40389				19311																		62574													14661
126	73	Q42560|ACO1_ARATH	K.AC(+57.02)DLGLEVKPWIK.T	Y	56.97	1527.81	13	-5.4	764.909	2	18.98																	6535.8
110	238	Q9SEI2|PS6AA_ARATH	R.AC(+57.02)AAQTNATFLK.L	Y	51.5	1294.63	12	-5.4	648.318	2	14.78							27212
110	263	O04019|PS6AB_ARATH	R.AC(+57.02)AAQTNATFLK.L	Y	51.5	1294.63	12	-5.4	648.318	2	14.78							27212
247	126	Q38J50|FOMT2_WHEAT	K.NC(+57.02)YDALPAHGK.V	Y	71.07	1244.56	11	1.7	623.286	2	12.34																9695.3
205	191	P68538|MI25_WHEAT	R.IC(+57.02)STVVESLPTAR.C	Y	68.75	1431.74	13	-0.3	716.873	2	16.82		10501							60665					16589
267	299	Q9LXC0|GDI_ARATH	K.EC(+57.02)ILSGLLSVDGLK.V	Y	70.1	1502.8	14	-1.2	752.407	2	23.59																									34430
265	331	Q39026|MPK6_ARATH	K.IC(+57.02)DFGLAR.V	Y	56.63	950.464	8	2.2	476.24	2	16.77																														8317.8
116	627	Q42564|APX3_ARATH	K.NC(+57.02)APIMLR.L	Y	91.83	973.484	8	0.4	487.747	2	16.59		36443		0				387080		0			150900					43319			104790													210380
116	1633	Q7XZP5|APX5_ARATH	R.NC(+57.02)APIMLR.L	Y	91.83	973.484	8	0.4	487.747	2	16.59		36443		0				387080		0			150900					43319			104790													210380
77	14	Q9SZN1|VATB2_ARATH	K.IPLFSAAGLPHNEIAAQIC(+57.02)R.Q	N	67.65	2177.14	20	-1.3	726.717	3	20.46																							12299
78	19	Q8W4E2|VATB3_ARATH	K.IPLFSAAGLPHNEIAAQIC(+57.02)R.Q	N	67.65	2177.14	20	-1.3	726.717	3	20.46																							12299
78	22	P11574|VATB1_ARATH	K.IPLFSAAGLPHNEIAAQIC(+57.02)R.Q	N	67.65	2177.14	20	-1.3	726.717	3	20.46																							12299
5	8	P32112|SAHH_WHEAT	R.LELELAEVEMPGLMAC(+57.02)R.T	Y	58.25	1959.95	17	-0.9	980.983	2	23.58																											2496.9
96	115	Q1W374|PMM_WHEAT	R.TVGHTVTSPNDTVQQC(+57.02)K.S	Y	112.15	1870.88	17	2	624.634	3	11.46								122910					62880																					89148
189	1247	Q38858|CALR2_ARATH	K.FGGDTPYSIMFGPDIC(+57.02)GYSTK.K	Y	50.33	2312.01	21	2	1157.02	2	22.76																							19598				2302
81	27	Q9LZF6|CD48E_ARATH	K.YTQGFSGADITEIC(+57.02)QR.A	N	52.21	1844.84	16	0.3	923.426	2	17.75
79	25	Q9SCN8|CD48D_ARATH	K.YTQGFSGADITEIC(+57.02)QR.S	N	52.21	1844.84	16	0.3	923.426	2	17.75
77	14	Q9SZN1|VATB2_ARATH	R.IALTTAEYLAYEC(+57.02)GK.H	N	73.04	1701.83	15	0.2	851.918	2	19.28	0																						17191
78	19	Q8W4E2|VATB3_ARATH	R.IALTTAEYLAYEC(+57.02)GK.H	N	73.04	1701.83	15	0.2	851.918	2	19.28	0																						17191
78	22	P11574|VATB1_ARATH	R.IALTTAEYLAYEC(+57.02)GK.H	N	73.04	1701.83	15	0.2	851.918	2	19.28	0																						17191
173	221	A8MS68|PLPD1_ARATH	K.TAIIEGDVVGGTC(+57.02)VNR.G	Y	56.91	1659.83	16	-0.1	830.917	2	16.46																																					0
173	241	F4JLP5|PLPD2_ARATH	K.TAIIEGDVVGGTC(+57.02)VNR.G	Y	56.91	1659.83	16	-0.1	830.917	2	16.46																																					0
7	108	Q9FZE1|UGDH1_ARATH	K.FLNASVGFGGSC(+57.02)FQK.D	N	98.44	1617.76	15	1.1	809.885	2	18.92					205280							0
10	93	Q9FM01|UGDH4_ARATH	K.FLNASVGFGGSC(+57.02)FQK.D	N	98.44	1617.76	15	1.1	809.885	2	18.92					205280							0
100	68	Q9SIB9|ACO3M_ARATH	R.SNLVGMGIIPLC(+57.02)FK.S	N	92.31	1547.82	14	-1.7	774.916	2	23.88																																54415
126	73	Q42560|ACO1_ARATH	R.SNLVGMGIIPLC(+57.02)FK.A	N	92.31	1547.82	14	-1.7	774.916	2	23.88																																54415
140	200	Q42669|ACOHC_CUCMC	R.SNLVGMGIIPLC(+57.02)FK.A	N	92.31	1547.82	14	-1.7	774.916	2	23.88																																54415
148	645	Q7DLS1|PSB7B_ARATH	R.ATEGPIVADKNC(+57.02)EK.I	Y	75.74	1530.73	14	-1.1	766.374	2	11.65			36576					63755	47081		0		37513
308	304	O82143|PSMDA_ORYSJ	R.FQAQADAVNLIC(+57.02)GAK.T	Y	55.3	1604.8	15	-6.1	803.397	2	18.53																					44592
344	427	Q9SX52|FYPP1_ARATH	R.QLTQVYGFYDEC(+57.02)QR.K	Y	53.06	1805.8	14	-0.1	903.909	2	18.16																												11193
344	428	Q9LHE7|FYPP3_ARATH	R.QLTQVYGFYDEC(+57.02)QR.K	Y	53.06	1805.8	14	-0.1	903.909	2	18.16																												11193
51	58	Q9ASR1|EF2_ARATH	R.ITDGALVVVDC(+57.02)IEGVC(+57.02)VQTETVLR.Q	Y	71.71	2645.34	24	1.5	1323.67	2	24.17																				4854.9
54	141	Q9FX54|G3PC2_ARATH	K.SDLDIVSNASC(+57.02)TTNC(+57.02)LAPLAK.V	Y	75.9	2249.07	21	0.2	1125.54	2	19.03		4457.3			9498.8											8334.9												24479						4893.5
54	162	P25858|G3PC1_ARATH	K.SDLDIVSNASC(+57.02)TTNC(+57.02)LAPLAK.V	Y	75.9	2249.07	21	0.2	1125.54	2	19.03		4457.3			9498.8											8334.9												24479						4893.5
24	55	Q41629|ADT1_WHEAT	R.LSEPYKGIGDC(+57.02)FGR.T	N	69.41	1597.76	14	0.7	533.593	3	16.17										54041								61485								120360
34	86	P31167|ADT1_ARATH	R.LSEPYKGIGDC(+57.02)FGR.T	N	69.41	1597.76	14	0.7	533.593	3	16.17										54041								61485								120360
101	310	O82616|SCRK5_ARATH	K.APGGAPANVAC(+57.02)AITK.L	Y	96.35	1396.71	15	0.4	699.361	2	15.19						242680										250190												174700
195	248	O23657|RABC1_ARATH	K.EIDLYSTNQDC(+57.02)IK.M	Y	58.29	1597.73	13	2.1	799.87	2	16.56														3602.5
274	251	P30184|AMPL1_ARATH	R.LTLADALVYAC(+57.02)NQGVDK.I	Y	62.3	1849.92	17	0.7	925.97	2	22																																				11224
274	317	Q944P7|AMPL2_ARATH	R.LTLADALVYAC(+57.02)NQGVDK.V	Y	62.3	1849.92	17	0.7	925.97	2	22																																				11224
5	8	P32112|SAHH_WHEAT	K.GETLEEYWWC(+57.02)TER.C	Y	92.45	1757.74	13	0.3	879.872	2	20.6	118270																						164070				20771									52667
18	12	Q9ZRB0|TBB3_WHEAT	R.EILHIQGGQC(+57.02)GNQIGAK.F	N	67.18	1821.92	17	1.8	608.311	3	14.64												32703
23	17	Q9ZRA9|TBB4_WHEAT	R.EILHIQGGQC(+57.02)GNQIGAK.F	N	67.18	1821.92	17	1.8	608.311	3	14.64												32703
36	15	Q9ZRB1|TBB2_WHEAT	R.VNVYYNEASC(+57.02)GR.F	N	68.81	1430.62	12	1.6	716.321	2	13.84						93575																						21965
36	15	Q9ZRB1|TBB2_WHEAT	R.EILHIQGGQC(+57.02)GNQIGAK.F	N	67.18	1821.92	17	1.8	608.311	3	14.64												32703
38	20	P29516|TBB8_ARATH	R.VNVYYNEASC(+57.02)GR.F	N	68.81	1430.62	12	1.6	716.321	2	13.84						93575																						21965
38	20	P29516|TBB8_ARATH	R.EILHIQGGQC(+57.02)GNQIGAK.F	N	67.18	1821.92	17	1.8	608.311	3	14.64												32703
30	13	Q9ZRA8|TBB5_WHEAT	R.VNVYYNEASC(+57.02)GR.F	N	68.81	1430.62	12	1.6	716.321	2	13.84						93575																						21965
30	16	Q9ZRB2|TBB1_WHEAT	R.VNVYYNEASC(+57.02)GR.F	N	68.81	1430.62	12	1.6	716.321	2	13.84						93575																						21965
81	27	Q9LZF6|CD48E_ARATH	K.GVLFYGPPGC(+57.02)GK.T	N	82.19	1250.61	12	-1.8	626.312	2	18.14																	16004		19622			13545										2278.1
79	25	Q9SCN8|CD48D_ARATH	K.GVLFYGPPGC(+57.02)GK.T	N	82.19	1250.61	12	-1.8	626.312	2	18.14																	16004		19622			13545										2278.1
42	28	P29514|TBB6_ARATH	R.VNVYYNEASC(+57.02)GR.Y	N	68.81	1430.62	12	1.6	716.321	2	13.84						93575																						21965
231	178	Q6XJG8|PSD2B_ARATH	R.AVPLALGLLC(+57.02)ISNPK.V	Y	86.52	1564.9	15	-1.1	783.457	2	23.88																	3944.6															23467
231	189	Q9SIV2|PSD2A_ARATH	R.AVPLALGLLC(+57.02)ISNPK.V	Y	86.52	1564.9	15	-1.1	783.457	2	23.88																	3944.6															23467
130	571	O48661|SPDS2_ARATH	R.HSSVEQIDIC(+57.02)EIDK.M	Y	66.15	1671.78	14	2	836.898	2	16.23																												27236
12	31	P53494|ACT4_ARATH	K.C(+57.02)DVDIRK.D	N	59.27	904.444	7	0.9	453.227	2	11.16																					0
12	32	P53497|ACT12_ARATH	K.C(+57.02)DVDIRK.D	N	59.27	904.444	7	0.9	453.227	2	11.16																					0
26	26	P53496|ACT11_ARATH	K.C(+57.02)DVDIRK.D	N	59.27	904.444	7	0.9	453.227	2	11.16																					0
41	24	Q9ZRB7|TBA_WHEAT	K.C(+57.02)GINYQPPGVVPGGDLAK.V	Y	87.96	1840.91	18	1.6	921.461	2	18				0			9997					54055
33	37	P53492|ACT7_ARATH	K.C(+57.02)DVDIRK.D	N	59.27	904.444	7	0.9	453.227	2	11.16																					0
58	42	P83483|ATPBM_ARATH	K.C(+57.02)ALVYGQMNEPPGAR.A	Y	60.58	1661.77	15	-2.9	831.885	2	16.09	2904.7
58	43	P83484|ATPBN_ARATH	K.C(+57.02)ALVYGQMNEPPGAR.A	Y	60.58	1661.77	15	-2.9	831.885	2	16.09	2904.7
58	47	Q9C5A9|ATPBO_ARATH	K.C(+57.02)ALVYGQMNEPPGAR.A	Y	60.58	1661.77	15	-2.9	831.885	2	16.09	2904.7
144	99	P11139|TBA1_ARATH	K.C(+57.02)GINYQPPSVVPGGDLAK.V	Y	73.62	1870.92	18	7.7	936.472	2	18.26												0
248	175	Q9M7Q7|PCNA1_ARATH	K.C(+57.02)AGNDDIITIK.A	Y	65.86	1218.59	11	0.5	610.303	2	16.32																												43848
248	184	Q9ZW35|PCNA2_ARATH	K.C(+57.02)AGNDDIITIK.A	Y	65.86	1218.59	11	0.5	610.303	2	16.32																												43848
4	4	P41378|IF4A_WHEAT	M.A(+42.01)GM(+15.99)APEGSQFDAK.N	Y	62.14	1365.59	13	0.4	683.798	2	14.7					338630							627930
17	81	O50008|METE1_ARATH	M.A(+42.01)SHIVGYPR.M	Y	78.59	1040.54	9	-0.1	521.277	2	15.5		66083	74638			83476	132370		92351		77342			41391		79990				183670		8381.3		194940				89605		9349.2	5314.6		16835	0	6215
44	138	P29546|EF1B_WHEAT	M.A(+42.01)VTFSDLHTADGLK.A	Y	91.53	1515.76	14	-0.2	758.882	2	19.39				268640						350700								243550			629760
4	4	P41378|IF4A_WHEAT	R.GRDHTVSATHGDMDQNTR.D	Y	141.03	1996.88	18	1	500.224	4	10.6					268140							38293
4	4	P41378|IF4A_WHEAT	R.GIYAYGFEKPSAIQQR.G	Y	127.14	1826.93	16	1.3	914.47	2	16.61					522980		38699					483050									24459				16456	13071					22107		56815				111570
4	4	P41378|IF4A_WHEAT	K.GLDVIQQAQSGTGK.T	Y	125.55	1400.73	14	0.2	701.367	2	15.55			20034	42021	469540		185990			34526	16585	1020100						33978							2189.1	42083				21150	34816		115770				24265
4	4	P41378|IF4A_WHEAT	R.ILASGVHVVVGTPGR.V	Y	115.28	1460.85	15	0.4	731.427	2	15.98				8745.3	389960		0					364080									5753.4				10625								59492
4	4	P41378|IF4A_WHEAT	R.DHTVSATHGDMDQNTR.D	Y	97.23	1783.75	16	2.1	595.59	3	10.87					109290		26991					132140
4	4	P41378|IF4A_WHEAT	R.KGVAINFVTR.E	Y	86.61	1103.65	10	1	552.828	2	15.8					215370		52864					238980													5933.8						11858		86147				48988
4	4	P41378|IF4A_WHEAT	K.FMNKPVR.I	Y	80.86	890.48	7	0.4	446.245	2	11.34					62118		23525					46565
4	4	P41378|IF4A_WHEAT	R.VLITTDLLAR.G	Y	79.75	1113.68	10	0.1	557.842	2	20.18					255670		70810					243180													277360					17363	16862	5482.6	66740		0		103450
4	4	P41378|IF4A_WHEAT	K.GVAINFVTR.E	Y	76.17	975.55	9	1	488.78	2	17.79					102840							0																					32757				47308
4	4	P41378|IF4A_WHEAT	R.ALGDYLGVK.V	Y	76.17	934.512	9	0	468.261	2	17.53					195550							534110													8613.1						29355		56541				112490
4	4	P41378|IF4A_WHEAT	R.KVDWLTDK.M	Y	70.66	1003.53	8	1	502.772	2	15.09					150450		52355					284270																			9046.7		40961
4	4	P41378|IF4A_WHEAT	R.DELTLEGIK.Q	N	66.78	1016.54	9	1.2	509.275	2	17.73					80007							171290																					21079				29283
4	4	P41378|IF4A_WHEAT	R.MLFDIQK.F	Y	61.82	893.468	7	0.8	447.739	2	18.7					56412							193580
4	4	P41378|IF4A_WHEAT	R.QSLRPDNIK.M	Y	61.56	1069.59	9	0.3	535.799	2	11.81												801140						37987
4	4	P41378|IF4A_WHEAT	K.RDELTLEGIK.Q	N	60.8	1172.64	10	0.9	587.325	2	15.93					362140							545810
4	4	P41378|IF4A_WHEAT	R.ELAQQIEK.V	Y	59.43	957.513	8	-1.3	479.761	2	12.62					369770		140670					865700									26254
4	4	P41378|IF4A_WHEAT	R.KFMNKPVR.I	Y	52.01	1018.57	8	1.6	510.293	2	10.81												30515
4	4	P41378|IF4A_WHEAT	K.QFYVNVEKEEWK.L	Y	51.33	1597.78	12	1.8	533.598	3	16.83												32604
1	9	Q03033|EF1A_WHEAT	K.THINIVVIGHVDSGK.S	Y	132.52	1587.87	15	0.5	794.94	2	15.91					192470							8146.9					1520.4						5702.3		12029												7246.9
1	9	Q03033|EF1A_WHEAT	R.VETGVIKPGMVVTFGPTGLTTEVK.S	Y	127.65	2459.33	24	-1.3	820.784	3	20.86															19518										296440		4947.5					9294.8	1162.5				22901
1	9	Q03033|EF1A_WHEAT	R.EHALLAFTLGVK.Q	N	105.67	1297.74	12	-1.6	649.876	2	20.41																									193740												0
1	9	Q03033|EF1A_WHEAT	R.GFVASNSKDDPAK.E	Y	101.45	1334.65	13	-0.1	668.327	2	11.46		26954			418420		113660	18080	16031			1516900																						41825
1	9	Q03033|EF1A_WHEAT	R.LPLQDVYK.I	N	100.63	974.544	8	-0.6	488.276	2	16.67				120810	1195500	214220	312430			66937		3341700				137550		61844			69309				59166	87108				63761	64767		156520				862530
1	9	Q03033|EF1A_WHEAT	K.MIPTKPMVVETFATYPPLGR.F	Y	93.94	2247.18	20	-1.4	750.066	3	20.92					118100							69003			23967								32936		381440												27839
1	9	Q03033|EF1A_WHEAT	K.STTTGHLIYK.L	N	89.45	1119.59	10	0.7	560.802	2	12.42		25935		246840	945640	60742	100470	68903	22529	110070		2253000	52911	13631		68450		0			164110				6051									117530
1	9	Q03033|EF1A_WHEAT	K.IGGIGTVPVGR.V	N	83.69	1024.6	11	-1.8	513.308	2	16.33			60833	219540	1330700	125730	420340			135720		3822100				88124		0			186690				39827	164630		82878	13378	75961	81249		217750	97120		8994	784870
1	9	Q03033|EF1A_WHEAT	R.QTVAVGVIK.G	N	80.34	913.56	9	-0.7	457.784	2	15.08		27268	33895		649900		191900	30238		14377	18682	2364700		14565				20922					8901.4		16304						19243		92818
1	9	Q03033|EF1A_WHEAT	R.STNLDWYK.G	N	76.42	1025.48	8	1.1	513.746	2	16.43					252430							747540													13267					7860.5							135590
1	9	Q03033|EF1A_WHEAT	K.RGFVASNSKDDPAK.E	Y	73.54	1490.75	14	0.6	497.921	3	10.89					186340							458670
1	9	Q03033|EF1A_WHEAT	K.EVSSYLKK.V	N	62.1	952.523	8	-0.5	477.267	2	11.97				181220	333480		97576			78119		994390	43964			50833		109940			105110				2284.9									75311
1	9	Q03033|EF1A_WHEAT	K.ARYEEIVK.E	Y	61.1	1006.54	8	1	504.277	2	12.33							202460					1528700									122450
1	9	Q03033|EF1A_WHEAT	K.EVSSYLK.K	N	53.59	824.428	7	-0.7	413.219	2	13.68					143570
5	8	P32112|SAHH_WHEAT	K.VPDPESTDNPEFK.I	Y	94.38	1473.66	13	0.3	737.836	2	14.4	41924				60170	11124				14396		57237			39534								75444
5	8	P32112|SAHH_WHEAT	K.SGKVPDPESTDNPEFK.I	Y	94.01	1745.81	16	1.6	582.942	3	13.42	31567			20560								0			22650			17240			11154		33328
5	8	P32112|SAHH_WHEAT	R.LVGVSEETTTGVK.R	Y	91.36	1318.7	13	2.6	660.356	2	14.18	57177				48645	54340	19224			0		97235			48107	32777							99614					16890
5	8	P32112|SAHH_WHEAT	R.HSLPDGLMR.A	Y	83.08	1024.51	9	1.4	513.262	2	14.64	66121														58032								91913
5	8	P32112|SAHH_WHEAT	K.DIIMVDHMR.K	Y	82.55	1128.54	9	1.4	565.279	2	16.64	54899														46452								72757													22826
5	8	P32112|SAHH_WHEAT	R.DSAAVFAWK.G	Y	82.4	993.492	9	0.1	497.751	2	18.97	54847																						126800
5	8	P32112|SAHH_WHEAT	R.TEFGPSQPFK.G	Y	77.89	1136.55	10	1.9	569.281	2	15.88	80192														67999								93991													24312
5	8	P32112|SAHH_WHEAT	R.LVGVSEETTTGVKR.L	Y	75.93	1474.8	14	1.5	492.606	3	12.89	51533					18687				15594		19085			37535	14288		11673					63660					658.88
5	8	P32112|SAHH_WHEAT	R.LYQMQESGTLLFPAINVNDSVTK.S	Y	71.46	2567.29	23	-1.4	1284.65	2	22.76															52006								26738				17680
5	8	P32112|SAHH_WHEAT	K.TGIIVLAEGR.L	Y	66.37	1027.6	10	0.2	514.807	2	18.25	238940				0										180480								343130													77316
5	8	P32112|SAHH_WHEAT	K.VAALHLGK.L	Y	60.74	807.497	8	0.3	404.754	2	13.54	85369						6395.1				9801.5	57575			69736						18811		118940											16569
5	8	P32112|SAHH_WHEAT	R.ATDVMIAGK.V	Y	60.7	904.469	9	-0.2	453.24	2	13.75	20154											83199			17185								30993
5	8	P32112|SAHH_WHEAT	K.KVYVLPK.H	Y	59.74	845.537	7	0.3	423.774	2	13.19
5	8	P32112|SAHH_WHEAT	K.RITIKPQTDR.W	Y	57.46	1226.71	10	-0.3	409.909	3	11.19
5	8	P32112|SAHH_WHEAT	K.AEEEFEK.S	Y	54.16	880.381	7	-4.6	441.194	2	11.65															5090.5
5	8	P32112|SAHH_WHEAT	R.ITIKPQTDR.W	Y	51.81	1070.61	9	1.9	536.311	2	11.92															15499
3	61	Q8W4H7|EF1A2_ARATH	R.EHALLAFTLGVK.Q	N	105.67	1297.74	12	-1.6	649.876	2	20.41																									193740												0
3	61	Q8W4H7|EF1A2_ARATH	R.GYVASNSKDDPAK.G	Y	102.75	1350.64	13	1	676.326	2	10.81			0	12588	82546		38576	7913.2				151600	0					6551			14655													11704
3	61	Q8W4H7|EF1A2_ARATH	R.LPLQDVYK.I	N	100.63	974.544	8	-0.6	488.276	2	16.67				120810	1195500	214220	312430			66937		3341700				137550		61844			69309				59166	87108				63761	64767		156520				862530
3	61	Q8W4H7|EF1A2_ARATH	K.STTTGHLIYK.L	N	89.45	1119.59	10	0.7	560.802	2	12.42		25935		246840	945640	60742	100470	68903	22529	110070		2253000	52911	13631		68450		0			164110				6051									117530
3	61	Q8W4H7|EF1A2_ARATH	K.IGGIGTVPVGR.V	N	83.69	1024.6	11	-1.8	513.308	2	16.33			60833	219540	1330700	125730	420340			135720		3822100				88124		0			186690				39827	164630		82878	13378	75961	81249		217750	97120		8994	784870
3	61	Q8W4H7|EF1A2_ARATH	R.QTVAVGVIK.S	N	80.34	913.56	9	-0.7	457.784	2	15.08		27268	33895		649900		191900	30238		14377	18682	2364700		14565				20922					8901.4		16304						19243		92818
3	61	Q8W4H7|EF1A2_ARATH	R.STNLDWYK.G	N	76.42	1025.48	8	1.1	513.746	2	16.43					252430							747540													13267					7860.5							135590
3	61	Q8W4H7|EF1A2_ARATH	K.RGYVASNSKDDPAK.G	Y	69.68	1506.74	14	1	503.253	3	10.54					35746							53133
3	61	Q8W4H7|EF1A2_ARATH	K.EVSSYLKK.V	N	62.1	952.523	8	-0.5	477.267	2	11.97				181220	333480		97576			78119		994390	43964			50833		109940			105110				2284.9									75311
3	61	Q8W4H7|EF1A2_ARATH	K.EVSSYLK.K	N	53.59	824.428	7	-0.7	413.219	2	13.68					143570
3	62	Q0WL56|EF1A3_ARATH	R.EHALLAFTLGVK.Q	N	105.67	1297.74	12	-1.6	649.876	2	20.41																									193740												0
3	62	Q0WL56|EF1A3_ARATH	R.GYVASNSKDDPAK.G	Y	102.75	1350.64	13	1	676.326	2	10.81			0	12588	82546		38576	7913.2				151600	0					6551			14655													11704
3	62	Q0WL56|EF1A3_ARATH	R.LPLQDVYK.I	N	100.63	974.544	8	-0.6	488.276	2	16.67				120810	1195500	214220	312430			66937		3341700				137550		61844			69309				59166	87108				63761	64767		156520				862530
3	62	Q0WL56|EF1A3_ARATH	K.STTTGHLIYK.L	N	89.45	1119.59	10	0.7	560.802	2	12.42		25935		246840	945640	60742	100470	68903	22529	110070		2253000	52911	13631		68450		0			164110				6051									117530
3	62	Q0WL56|EF1A3_ARATH	K.IGGIGTVPVGR.V	N	83.69	1024.6	11	-1.8	513.308	2	16.33			60833	219540	1330700	125730	420340			135720		3822100				88124		0			186690				39827	164630		82878	13378	75961	81249		217750	97120		8994	784870
3	62	Q0WL56|EF1A3_ARATH	R.QTVAVGVIK.S	N	80.34	913.56	9	-0.7	457.784	2	15.08		27268	33895		649900		191900	30238		14377	18682	2364700		14565				20922					8901.4		16304						19243		92818
3	62	Q0WL56|EF1A3_ARATH	R.STNLDWYK.G	N	76.42	1025.48	8	1.1	513.746	2	16.43					252430							747540													13267					7860.5							135590
3	62	Q0WL56|EF1A3_ARATH	K.RGYVASNSKDDPAK.G	Y	69.68	1506.74	14	1	503.253	3	10.54					35746							53133
3	62	Q0WL56|EF1A3_ARATH	K.EVSSYLKK.V	N	62.1	952.523	8	-0.5	477.267	2	11.97				181220	333480		97576			78119		994390	43964			50833		109940			105110				2284.9									75311
3	62	Q0WL56|EF1A3_ARATH	K.EVSSYLK.K	N	53.59	824.428	7	-0.7	413.219	2	13.68					143570
3	63	P0DH99|EF1A1_ARATH	R.EHALLAFTLGVK.Q	N	105.67	1297.74	12	-1.6	649.876	2	20.41																									193740												0
3	63	P0DH99|EF1A1_ARATH	R.GYVASNSKDDPAK.G	Y	102.75	1350.64	13	1	676.326	2	10.81			0	12588	82546		38576	7913.2				151600	0					6551			14655													11704
3	63	P0DH99|EF1A1_ARATH	R.LPLQDVYK.I	N	100.63	974.544	8	-0.6	488.276	2	16.67				120810	1195500	214220	312430			66937		3341700				137550		61844			69309				59166	87108				63761	64767		156520				862530
3	63	P0DH99|EF1A1_ARATH	K.STTTGHLIYK.L	N	89.45	1119.59	10	0.7	560.802	2	12.42		25935		246840	945640	60742	100470	68903	22529	110070		2253000	52911	13631		68450		0			164110				6051									117530
3	63	P0DH99|EF1A1_ARATH	K.IGGIGTVPVGR.V	N	83.69	1024.6	11	-1.8	513.308	2	16.33			60833	219540	1330700	125730	420340			135720		3822100				88124		0			186690				39827	164630		82878	13378	75961	81249		217750	97120		8994	784870
3	63	P0DH99|EF1A1_ARATH	R.QTVAVGVIK.S	N	80.34	913.56	9	-0.7	457.784	2	15.08		27268	33895		649900		191900	30238		14377	18682	2364700		14565				20922					8901.4		16304						19243		92818
3	63	P0DH99|EF1A1_ARATH	R.STNLDWYK.G	N	76.42	1025.48	8	1.1	513.746	2	16.43					252430							747540													13267					7860.5							135590
3	63	P0DH99|EF1A1_ARATH	K.RGYVASNSKDDPAK.G	Y	69.68	1506.74	14	1	503.253	3	10.54					35746							53133
3	63	P0DH99|EF1A1_ARATH	K.EVSSYLKK.V	N	62.1	952.523	8	-0.5	477.267	2	11.97				181220	333480		97576			78119		994390	43964			50833		109940			105110				2284.9									75311
3	63	P0DH99|EF1A1_ARATH	K.EVSSYLK.K	N	53.59	824.428	7	-0.7	413.219	2	13.68					143570
3	64	Q8GTY0|EF1A4_ARATH	R.EHALLAFTLGVK.Q	N	105.67	1297.74	12	-1.6	649.876	2	20.41																									193740												0
3	64	Q8GTY0|EF1A4_ARATH	R.GYVASNSKDDPAK.G	Y	102.75	1350.64	13	1	676.326	2	10.81			0	12588	82546		38576	7913.2				151600	0					6551			14655													11704
3	64	Q8GTY0|EF1A4_ARATH	R.LPLQDVYK.I	N	100.63	974.544	8	-0.6	488.276	2	16.67				120810	1195500	214220	312430			66937		3341700				137550		61844			69309				59166	87108				63761	64767		156520				862530
3	64	Q8GTY0|EF1A4_ARATH	K.STTTGHLIYK.L	N	89.45	1119.59	10	0.7	560.802	2	12.42		25935		246840	945640	60742	100470	68903	22529	110070		2253000	52911	13631		68450		0			164110				6051									117530
3	64	Q8GTY0|EF1A4_ARATH	K.IGGIGTVPVGR.V	N	83.69	1024.6	11	-1.8	513.308	2	16.33			60833	219540	1330700	125730	420340			135720		3822100				88124		0			186690				39827	164630		82878	13378	75961	81249		217750	97120		8994	784870
3	64	Q8GTY0|EF1A4_ARATH	R.QTVAVGVIK.S	N	80.34	913.56	9	-0.7	457.784	2	15.08		27268	33895		649900		191900	30238		14377	18682	2364700		14565				20922					8901.4		16304						19243		92818
3	64	Q8GTY0|EF1A4_ARATH	R.STNLDWYK.G	N	76.42	1025.48	8	1.1	513.746	2	16.43					252430							747540													13267					7860.5							135590
3	64	Q8GTY0|EF1A4_ARATH	K.RGYVASNSKDDPAK.G	Y	69.68	1506.74	14	1	503.253	3	10.54					35746							53133
3	64	Q8GTY0|EF1A4_ARATH	K.EVSSYLKK.V	N	62.1	952.523	8	-0.5	477.267	2	11.97				181220	333480		97576			78119		994390	43964			50833		109940			105110				2284.9									75311
3	64	Q8GTY0|EF1A4_ARATH	K.EVSSYLK.K	N	53.59	824.428	7	-0.7	413.219	2	13.68					143570
14	6	P22953|HS701_ARATH	K.VQQLLQDFFNGK.E	N	105.8	1435.75	12	-0.3	718.88	2	21.83					16907																			85542											60692			110960
14	6	P22953|HS701_ARATH	R.IINEPTAAAIAYGLDKK.A	N	94.07	1786.98	17	-4.3	894.495	2	18.46				0					0	0			5751.3							131170	0			126000											10424			79981
14	6	P22953|HS701_ARATH	K.STVHDVVLVGGSTR.I	Y	93.43	1425.76	14	-3.8	713.883	2	14.54					0		24524					12951								23601				13887									2078
14	6	P22953|HS701_ARATH	K.NAVVTVPAYFNDSQR.Q	N	91.72	1679.83	15	-0.4	840.917	2	18.51		22514		59757				29920	45504	36201	0		28102					66695		56419	90775					82025								57035	10464			40620
14	6	P22953|HS701_ARATH	R.IINEPTAAAIAYGLDK.K	N	89.61	1658.89	16	-1	830.45	2	19.95			2956.3	6291	6041.5		10600				6927.4							6936.8		46942				32037	10915	9788.9				4926.5			4180.6		24074			52572
14	6	P22953|HS701_ARATH	K.ATAGDTHLGGEDFDNR.M	N	82.27	1674.72	16	2.8	559.247	3	13.12			7506.2	59235	20180			80311	15834	35108	4798.8	30356	53774	16416		7092.4		54523		16759	41588			7411.4										61369
14	6	P22953|HS701_ARATH	K.NALENYAYNMR.N	N	82.13	1357.61	11	-5.1	679.808	2	16.84																				10421				7866											1933.3
14	6	P22953|HS701_ARATH	R.FEELNMDLFR.K	N	82.01	1312.61	10	1.2	657.314	2	21.89																																						26012
14	6	P22953|HS701_ARATH	R.TTPSYVAFTDSER.L	N	75.66	1472.68	13	-4.9	737.343	2	16.69				50142				73706		40690	29002	30453		17884				52725		15686	55397			23722					10794					85679	7519.4			1756.1
14	6	P22953|HS701_ARATH	K.ITITNDKGR.L	N	67.66	1016.56	9	1.8	509.286	2	11.22				45378						30549								27963		2927.8	32910			2533.6
14	6	P22953|HS701_ARATH	K.EQVFSTYSDNQPGVLIQVYEGER.A	N	67.57	2657.26	23	-2.8	1329.63	2	21.2																								6171.7														4709.2
14	6	P22953|HS701_ARATH	R.ARFEELNMDLFR.K	N	66.14	1539.75	12	0.6	770.883	2	20.23																				33148																		60862
14	6	P22953|HS701_ARATH	R.VEIIANDQGNR.T	N	64.73	1227.62	11	0.7	614.816	2	13.57														13193						6390.8														0
14	6	P22953|HS701_ARATH	R.MVNHFVQEFK.R	N	55.54	1277.62	10	-2.7	639.817	2	15.59				25398																22861	117380			19216
14	6	P22953|HS701_ARATH	R.NTTIPTKK.E	N	54.48	901.523	8	-7.9	451.766	2	10.66																				1842.1
14	6	P22953|HS701_ARATH	K.DAGVIAGLNVMR.I	N	54.09	1214.64	12	-0.2	608.329	2	19.95																																						10543
14	6	P22953|HS701_ARATH	K.ITITNDK.G	N	52.62	803.439	7	-1.6	402.724	2	12.14							18046
25	71	Q05855|PER1_WHEAT	R.DSTTASASLANSDLPGPSSSR.S	Y	113.37	2019.93	21	2.7	1010.97	2	15.63				350650						230030								250930			293240					256800
25	71	Q05855|PER1_WHEAT	R.DSVVALGGPSWTVPLGR.R	N	110.98	1709.91	17	-0.7	855.957	2	22.09				145420						90687								140210			294820					137450		6406.8
25	71	Q05855|PER1_WHEAT	R.IYGGDTNINTAFATSLK.A	Y	97.18	1784.89	17	1	893.451	2	19.02				211170						103630								193680			218000					165630
25	71	Q05855|PER1_WHEAT	K.MGNIAPLTGTQGQIR.L	Y	96.38	1555.81	15	0.3	778.911	2	16.91				385860						261070								286360			365720					303020
25	71	Q05855|PER1_WHEAT	K.NLNTVDMVALSGAHTIGK.A	Y	92.1	1839.95	18	1.4	920.979	2	18.54				113050						0								128280			0					120690
25	71	Q05855|PER1_WHEAT	K.SGVAAAVSSDPR.M	Y	92.08	1115.56	12	0.3	558.783	2	12.39			0	617880						447470								563120			562440
25	71	Q05855|PER1_WHEAT	R.SQLEAAFLKK.N	Y	78.07	1133.64	10	0.8	567.827	2	15.76				498670						282010								331400			402590					373350
25	71	Q05855|PER1_WHEAT	R.GFGVIDNIK.T	Y	74.23	961.523	9	0.9	481.769	2	18.06				178490						112300								150720			116850					134870
25	71	Q05855|PER1_WHEAT	R.SQLEAAFLK.K	Y	71.03	1005.55	9	1.4	503.78	2	17.95				130480						98651								115570			104010					112230
25	71	Q05855|PER1_WHEAT	R.RDSTTASASLANSDLPGPSSSR.S	Y	70.95	2176.04	22	2.9	726.351	3	14.29																					0
25	71	Q05855|PER1_WHEAT	R.NFASNAAAFSSAFTTAMIK.M	Y	54.21	1948.94	19	0	975.475	2	23.46																										8961.4
18	12	Q9ZRB0|TBB3_WHEAT	K.YAGDSDLQLER.I	N	98.38	1265.59	11	1.4	633.8	2	14.74	4864.6				106920	41484	66540					255330				26313					9218		10049					18570					27213
18	12	Q9ZRB0|TBB3_WHEAT	K.NSSYFVEWIPNNVK.S	N	92.03	1695.83	14	-0.8	848.919	2	21.48	19971				41079										22613		0						43591		70037											28880
18	12	Q9ZRB0|TBB3_WHEAT	R.INVYYNEASGGR.F	N	91.7	1341.63	12	1	671.82	2	14.56				36779	77490	37217	63013			37653		249680			3851.1	29536		29922					7905.1			27830		12856					10975
18	12	Q9ZRB0|TBB3_WHEAT	K.EVDEQMLNVQNK.N	N	87.32	1445.68	12	1	723.845	2	14.74					64199		102590					185830									1927.5		5132								0		0
18	12	Q9ZRB0|TBB3_WHEAT	R.YLTASAMFR.G	N	84.78	1058.52	9	1.8	530.266	2	18.26					43681	0	17371					102850			15553				0				41128	6707.7				14787				900.04	15929			12220	40725
18	12	Q9ZRB0|TBB3_WHEAT	R.VSEQFTAMFR.R	N	80.87	1214.58	10	0.5	608.295	2	19.34							20047					44989			14414								20801		0								9878.8			16577	25727
18	12	Q9ZRB0|TBB3_WHEAT	K.LAVNLIPFPR.L	N	79.24	1138.69	10	1.7	570.349	2	22.33	47081				49216										40059	16561				6730.7			130830		75430		33863						13208			65946	34910
18	12	Q9ZRB0|TBB3_WHEAT	R.FPGQLNSDLR.K	N	76.14	1145.58	10	1.7	573.797	2	16.47								0				303780
18	12	Q9ZRB0|TBB3_WHEAT	R.AVLMDLEPGTMDSLR.S	Y	71.59	1646.8	15	-1.4	824.409	2	20.95	11938														15159								29014				5827					0
18	12	Q9ZRB0|TBB3_WHEAT	R.MMLTFSVFPSPK.V	N	68.75	1383.69	12	0.6	692.854	2	23.22																											5039.7									12097
18	12	Q9ZRB0|TBB3_WHEAT	R.SGPYGQIFRPDNFVFGQSGAGNNWAK.G	N	68.01	2813.33	26	-1.4	938.779	3	20.76															0								16473
18	12	Q9ZRB0|TBB3_WHEAT	K.GHYTEGAELIDSVLDVVR.K	N	67.03	1971.99	18	-2.3	658.338	3	23.76															1362.1												841.69
18	12	Q9ZRB0|TBB3_WHEAT	R.LHFFMVGFAPLTSR.G	N	66.75	1621.84	14	-2	541.622	3	22.99																											1792.3									4090.6		811.68
18	12	Q9ZRB0|TBB3_WHEAT	K.IREEYPDR.M	N	66.39	1076.53	8	0.8	539.268	2	11.2					139500	0	123960					295940				66204		123230
18	12	Q9ZRB0|TBB3_WHEAT	R.ALTVPELTQQMWDSK.N	N	63.15	1745.87	15	-1.4	873.942	2	21.65																							19293				3516.5
18	12	Q9ZRB0|TBB3_WHEAT	R.FPGQLNSDLRK.L	N	57.6	1273.68	11	-1	425.566	3	14.5												82078																9952
18	12	Q9ZRB0|TBB3_WHEAT	R.KLAVNLIPFPR.L	N	51.27	1266.78	11	-2.3	423.267	3	20.47																									6480.2
19	10	Q9LHA8|HS704_ARATH	K.VQQLLQDFFNGK.E	N	105.8	1435.75	12	-0.3	718.88	2	21.83					16907																			85542											60692			110960
19	10	Q9LHA8|HS704_ARATH	R.IINEPTAAAIAYGLDKK.A	N	94.07	1786.98	17	-4.3	894.495	2	18.46				0					0	0			5751.3							131170	0			126000											10424			79981
19	10	Q9LHA8|HS704_ARATH	K.NAVVTVPAYFNDSQR.Q	N	91.72	1679.83	15	-0.4	840.917	2	18.51		22514		59757				29920	45504	36201	0		28102					66695		56419	90775					82025								57035	10464			40620
19	10	Q9LHA8|HS704_ARATH	R.IINEPTAAAIAYGLDK.K	N	89.61	1658.89	16	-1	830.45	2	19.95			2956.3	6291	6041.5		10600				6927.4							6936.8		46942				32037	10915	9788.9				4926.5			4180.6		24074			52572
19	10	Q9LHA8|HS704_ARATH	K.SINPDEAVAYGAAVQAAILSGEGNEK.V	N	85.18	2573.26	26	-0.9	1287.64	2	23.48															3744					21007				18980											16028			172460
19	10	Q9LHA8|HS704_ARATH	K.ATAGDTHLGGEDFDNR.M	N	82.27	1674.72	16	2.8	559.247	3	13.12			7506.2	59235	20180			80311	15834	35108	4798.8	30356	53774	16416		7092.4		54523		16759	41588			7411.4										61369
19	10	Q9LHA8|HS704_ARATH	K.NALENYAYNMR.N	N	82.13	1357.61	11	-5.1	679.808	2	16.84																				10421				7866											1933.3
19	10	Q9LHA8|HS704_ARATH	R.FEELNMDLFR.K	N	82.01	1312.61	10	1.2	657.314	2	21.89																																						26012
19	10	Q9LHA8|HS704_ARATH	R.TTPSYVAFTDSER.L	N	75.66	1472.68	13	-4.9	737.343	2	16.69				50142				73706		40690	29002	30453		17884				52725		15686	55397			23722					10794					85679	7519.4			1756.1
19	10	Q9LHA8|HS704_ARATH	K.ITITNDKGR.L	N	67.66	1016.56	9	1.8	509.286	2	11.22				45378						30549								27963		2927.8	32910			2533.6
19	10	Q9LHA8|HS704_ARATH	R.ARFEELNMDLFR.K	N	66.14	1539.75	12	0.6	770.883	2	20.23																				33148																		60862
19	10	Q9LHA8|HS704_ARATH	R.VEIIANDQGNR.T	N	64.73	1227.62	11	0.7	614.816	2	13.57														13193						6390.8														0
19	10	Q9LHA8|HS704_ARATH	R.LSKEEIEK.M	N	61.8	974.528	8	1.2	488.27	2	11.01				24703
19	10	Q9LHA8|HS704_ARATH	R.MVNHFVQEFK.R	N	55.54	1277.62	10	-2.7	639.817	2	15.59				25398																22861	117380			19216
19	10	Q9LHA8|HS704_ARATH	R.NTTIPTKK.E	N	54.48	901.523	8	-7.9	451.766	2	10.66																				1842.1
19	10	Q9LHA8|HS704_ARATH	K.ITITNDK.G	N	52.62	803.439	7	-1.6	402.724	2	12.14							18046
20	5	P22954|HS702_ARATH	K.VQQLLQDFFNGK.E	N	105.8	1435.75	12	-0.3	718.88	2	21.83					16907																			85542											60692			110960
20	5	P22954|HS702_ARATH	R.IINEPTAAAIAYGLDKK.A	N	94.07	1786.98	17	-4.3	894.495	2	18.46				0					0	0			5751.3							131170	0			126000											10424			79981
20	5	P22954|HS702_ARATH	K.NAVVTVPAYFNDSQR.Q	N	91.72	1679.83	15	-0.4	840.917	2	18.51		22514		59757				29920	45504	36201	0		28102					66695		56419	90775					82025								57035	10464			40620
20	5	P22954|HS702_ARATH	R.IINEPTAAAIAYGLDK.K	N	89.61	1658.89	16	-1	830.45	2	19.95			2956.3	6291	6041.5		10600				6927.4							6936.8		46942				32037	10915	9788.9				4926.5			4180.6		24074			52572
20	5	P22954|HS702_ARATH	K.SINPDEAVAYGAAVQAAILSGEGNEK.V	N	85.18	2573.26	26	-0.9	1287.64	2	23.48															3744					21007				18980											16028			172460
20	5	P22954|HS702_ARATH	K.ATAGDTHLGGEDFDNR.M	N	82.27	1674.72	16	2.8	559.247	3	13.12			7506.2	59235	20180			80311	15834	35108	4798.8	30356	53774	16416		7092.4		54523		16759	41588			7411.4										61369
20	5	P22954|HS702_ARATH	K.NALENYAYNMR.N	N	82.13	1357.61	11	-5.1	679.808	2	16.84																				10421				7866											1933.3
20	5	P22954|HS702_ARATH	R.TTPSYVAFTDSER.L	N	75.66	1472.68	13	-4.9	737.343	2	16.69				50142				73706		40690	29002	30453		17884				52725		15686	55397			23722					10794					85679	7519.4			1756.1
20	5	P22954|HS702_ARATH	R.FEEMNMDLFR.K	N	68.1	1330.57	10	-6.4	666.289	2	20.93																				4370
20	5	P22954|HS702_ARATH	K.QFAAEEISSMVLIK.M	N	67.84	1564.82	14	0.5	783.416	2	22.25																																						0
20	5	P22954|HS702_ARATH	K.ITITNDKGR.L	N	67.66	1016.56	9	1.8	509.286	2	11.22				45378						30549								27963		2927.8	32910			2533.6
20	5	P22954|HS702_ARATH	R.VEIIANDQGNR.T	N	64.73	1227.62	11	0.7	614.816	2	13.57														13193						6390.8														0
20	5	P22954|HS702_ARATH	K.EQVFSTYSDNQPGVLIQVFEGER.A	Y	63.5	2641.27	23	1	1321.64	2	23.6																																						34600
20	5	P22954|HS702_ARATH	R.MVNHFVQEFK.R	N	55.54	1277.62	10	-2.7	639.817	2	15.59				25398																22861	117380			19216
20	5	P22954|HS702_ARATH	R.NTTIPTKK.E	N	54.48	901.523	8	-7.9	451.766	2	10.66																				1842.1
20	5	P22954|HS702_ARATH	K.ITITNDK.G	N	52.62	803.439	7	-1.6	402.724	2	12.14							18046
20	5	P22954|HS702_ARATH	R.EIAEAFLGTTVK.N	Y	52.03	1277.69	12	-4.6	639.845	2	19.19				0
29	7	P12862|ATPAM_WHEAT	R.VVDALGVPIDGK.G	Y	94.72	1181.67	12	0.4	591.838	2	18.09	86336	30090												18025	59972								103720													27795
29	7	P12862|ATPAM_WHEAT	R.EAFPGDVFYLHSR.L	N	93.47	1536.74	13	0.8	769.373	2	19.48	113830														108910								131010													70096
29	7	P12862|ATPAM_WHEAT	K.TAIAIDTILNQK.Q	Y	91.79	1299.74	12	0.8	650.875	2	19.95	0														62088								0													25771
29	7	P12862|ATPAM_WHEAT	R.TGSIVDVPAGK.A	N	83.72	1042.57	11	-0.9	522.288	2	14.63	20477	48138	29893											34830	14285								24651
29	7	P12862|ATPAM_WHEAT	R.MTNFYTNFQVDEIGR.V	Y	81.88	1833.84	15	1.3	917.926	2	20.54															10435								15282													9341.7
29	7	P12862|ATPAM_WHEAT	R.AAELTTLLESR.M	Y	77.3	1202.65	11	-0.5	602.33	2	19.39	121060														100160								142640				8122.1									0
29	7	P12862|ATPAM_WHEAT	K.AILSTINPELQK.S	Y	75.39	1325.76	12	0.3	663.883	2	17.87	43886					26691	0								33502	18396							91581					36790								21460
29	7	P12862|ATPAM_WHEAT	K.GALSDHER.R	Y	73.51	883.415	8	-0.3	442.713	2	10.53
29	7	P12862|ATPAM_WHEAT	R.GIRPAINVGLSVSR.V	N	72.89	1437.84	14	0.2	480.286	3	16.82
29	7	P12862|ATPAM_WHEAT	R.VVSVGDGIAR.V	Y	71.98	971.54	10	0.9	486.776	2	14.15	0														0								0
29	7	P12862|ATPAM_WHEAT	K.AVDSLVPIGR.G	N	69.54	1025.59	10	0.5	513.799	2	17.84	65235	16308													41709			0					66053													22193
29	7	P12862|ATPAM_WHEAT	R.DNGMHALIIYDDLSK.Q	N	68.43	1703.82	15	-0.7	852.913	2	20.05																							41045				1218.3
29	7	P12862|ATPAM_WHEAT	K.GIALNLENENVGIVVFGSDTAIK.E	Y	67.18	2372.26	23	3	1187.14	2	23.09
29	7	P12862|ATPAM_WHEAT	R.VYGLNEIQAGEMVEFASGVK.G	Y	60.01	2140.05	20	-1.5	1071.03	2	22.46																											2057.3
29	7	P12862|ATPAM_WHEAT	K.LELAQYR.E	N	57.56	891.481	7	-2.1	446.745	2	15.26															12040								24062
29	7	P12862|ATPAM_WHEAT	K.QPQYEPLPIEK.Q	Y	55.32	1340.7	11	1.3	671.354	2	16.95	22363																						31324
29	7	P12862|ATPAM_WHEAT	R.QMSLLLR.R	N	50.85	859.495	7	-0.1	430.753	2	18.5																							43049
12	31	P53494|ACT4_ARATH	R.VAPEEHPVLLTEAPLNPK.A	N	130.38	1953.06	18	1.4	652.024	3	17.76		28127	52589	152350	5119.4	268290	0	0	75273	89212		45788	0	31925		194840	12454	119010			202260					173490		311950	32594	4593.8	17164		29946	0
12	31	P53494|ACT4_ARATH	R.GYSFTTTAER.E	Y	96.09	1131.52	10	0.9	566.765	2	14.41		73259	83285	171370		241940	48644	103460	64307	136600	80772		84872	61514		198920	3349.2	141070	2727.9		185710					84025		79906					3197.6	104000
12	31	P53494|ACT4_ARATH	K.AEYDESGPSIVHR.K	N	84.73	1458.67	13	3.3	730.343	2	13.21						0	16063									0												0
12	31	P53494|ACT4_ARATH	K.DAYVGDEAQSK.R	N	80.43	1181.52	11	1.8	591.766	2	11.66		22263	33007	31832		94392	30527	42001	42175		19719		35088	26805		60719																		45204
12	31	P53494|ACT4_ARATH	K.DAYVGDEAQSKR.G	N	78.81	1337.62	12	1.2	669.815	2	11.14		0	0			70161	0	20966				0		14480		45967		16492																60245
12	31	P53494|ACT4_ARATH	K.EITALAPSSMK.I	N	77.6	1146.6	11	0.5	574.302	2	16.07				0		163140	105370			0						112060		0			0					0		138110		28904	23102
12	31	P53494|ACT4_ARATH	R.AVFPSIVGRPR.H	N	74.26	1197.7	11	0.7	400.238	3	16.83
12	31	P53494|ACT4_ARATH	R.HTGVMVGMGQK.D	N	70.69	1143.55	11	1.7	572.782	2	12.61			10887			0						0									27084
12	31	P53494|ACT4_ARATH	R.TTGIVLDSGDGVSHTVPIYEGYALPHAILR.L	N	68.43	3150.64	30	-3.2	1051.22	3	20.67																								5767.8
12	31	P53494|ACT4_ARATH	K.AGFAGDDAPR.A	N	67.34	975.441	10	0.4	488.726	2	12.62					0		56381
12	31	P53494|ACT4_ARATH	K.VVAPPERK.Y	N	60.6	894.529	8	1.1	448.27	2	10.84				4862		11804										6906.3
12	32	P53497|ACT12_ARATH	R.VAPEEHPVLLTEAPLNPK.A	N	130.38	1953.06	18	1.4	652.024	3	17.76		28127	52589	152350	5119.4	268290	0	0	75273	89212		45788	0	31925		194840	12454	119010			202260					173490		311950	32594	4593.8	17164		29946	0
12	32	P53497|ACT12_ARATH	R.GYSFTTTAER.E	Y	96.09	1131.52	10	0.9	566.765	2	14.41		73259	83285	171370		241940	48644	103460	64307	136600	80772		84872	61514		198920	3349.2	141070	2727.9		185710					84025		79906					3197.6	104000
12	32	P53497|ACT12_ARATH	K.AEYDESGPSIVHR.K	N	84.73	1458.67	13	3.3	730.343	2	13.21						0	16063									0												0
12	32	P53497|ACT12_ARATH	K.DAYVGDEAQSK.R	N	80.43	1181.52	11	1.8	591.766	2	11.66		22263	33007	31832		94392	30527	42001	42175		19719		35088	26805		60719																		45204
12	32	P53497|ACT12_ARATH	K.DAYVGDEAQSKR.G	N	78.81	1337.62	12	1.2	669.815	2	11.14		0	0			70161	0	20966				0		14480		45967		16492																60245
12	32	P53497|ACT12_ARATH	K.EITALAPSSMK.I	N	77.6	1146.6	11	0.5	574.302	2	16.07				0		163140	105370			0						112060		0			0					0		138110		28904	23102
12	32	P53497|ACT12_ARATH	R.AVFPSIVGRPR.H	N	74.26	1197.7	11	0.7	400.238	3	16.83
12	32	P53497|ACT12_ARATH	R.HTGVMVGMGQK.D	N	70.69	1143.55	11	1.7	572.782	2	12.61			10887			0						0									27084
12	32	P53497|ACT12_ARATH	R.TTGIVLDSGDGVSHTVPIYEGYALPHAILR.L	N	68.43	3150.64	30	-3.2	1051.22	3	20.67																								5767.8
12	32	P53497|ACT12_ARATH	K.AGFAGDDAPR.A	N	67.34	975.441	10	0.4	488.726	2	12.62					0		56381
12	32	P53497|ACT12_ARATH	K.VVAPPERK.Y	N	60.6	894.529	8	1.1	448.27	2	10.84				4862		11804										6906.3
24	55	Q41629|ADT1_WHEAT	R.TIKDEGFGSLWR.G	N	100.37	1407.71	12	0.1	704.861	2	18.45				312850						126850								205500			383970					269420
24	55	Q41629|ADT1_WHEAT	K.LLIQNQDEMIK.A	N	98.08	1343.71	11	-0.5	672.86	2	17.02				727310						677400								488740			660010					786180								12807
24	55	Q41629|ADT1_WHEAT	K.SSLDAFQQILKK.E	Y	96.7	1376.77	12	-0.6	689.39	2	19.28				81103						321490								74915			161960					151390
24	55	Q41629|ADT1_WHEAT	K.SDGIAGLYR.G	Y	90.09	950.482	9	0.6	476.246	2	16.16				487100						418400								317920			452830					433820
24	55	Q41629|ADT1_WHEAT	R.YFPTQALNFAFK.D	N	87.96	1445.73	12	0.2	723.871	2	22.45																					72785					75345
24	55	Q41629|ADT1_WHEAT	K.SSLDAFQQILK.K	Y	84.64	1248.67	11	-1.2	625.342	2	21.04				40581						45336											102410					143830
24	55	Q41629|ADT1_WHEAT	R.QFNGLVDVYR.K	Y	77.2	1209.61	10	0	605.811	2	18.57				246030						248370								212330			265370					282790
24	55	Q41629|ADT1_WHEAT	R.MMMTSGEAVK.Y	N	70.85	1083.48	10	1	542.743	2	13.54				165670						110140								74847			170600
24	55	Q41629|ADT1_WHEAT	R.GNTANVIR.Y	N	69.02	843.456	8	0.4	422.733	2	11.76				305580						205350								171500			262160
24	55	Q41629|ADT1_WHEAT	K.DEGFGSLWR.G	N	65.09	1065.49	9	1.2	533.752	2	20.36																										4919.6
24	55	Q41629|ADT1_WHEAT	K.DKDGYWK.W	Y	64.5	910.418	7	1.2	456.215	2	12.39										48399								47925			74176
24	55	Q41629|ADT1_WHEAT	K.TAAAPIER.V	N	59.33	827.45	8	-0.2	414.73	2	11.73				504090						390680								346100			385750													16598
26	26	P53496|ACT11_ARATH	R.VAPEEHPVLLTEAPLNPK.A	N	130.38	1953.06	18	1.4	652.024	3	17.76		28127	52589	152350	5119.4	268290	0	0	75273	89212		45788	0	31925		194840	12454	119010			202260					173490		311950	32594	4593.8	17164		29946	0
26	26	P53496|ACT11_ARATH	K.AEYDESGPSIVHR.K	N	84.73	1458.67	13	3.3	730.343	2	13.21						0	16063									0												0
26	26	P53496|ACT11_ARATH	R.GYSFTTSAER.E	Y	80.65	1117.5	10	2	559.758	2	14.2			26243	53051		72571		34698					26960			57401		40796			58270													28883
26	26	P53496|ACT11_ARATH	K.DAYVGDEAQSK.R	N	80.43	1181.52	11	1.8	591.766	2	11.66		22263	33007	31832		94392	30527	42001	42175		19719		35088	26805		60719																		45204
26	26	P53496|ACT11_ARATH	K.DAYVGDEAQSKR.G	N	78.81	1337.62	12	1.2	669.815	2	11.14		0	0			70161	0	20966				0		14480		45967		16492																60245
26	26	P53496|ACT11_ARATH	K.EITALAPSSMK.I	N	77.6	1146.6	11	0.5	574.302	2	16.07				0		163140	105370			0						112060		0			0					0		138110		28904	23102
26	26	P53496|ACT11_ARATH	R.AVFPSIVGRPR.H	N	74.26	1197.7	11	0.7	400.238	3	16.83
26	26	P53496|ACT11_ARATH	R.HTGVMVGMGQK.D	N	70.69	1143.55	11	1.7	572.782	2	12.61			10887			0						0									27084
26	26	P53496|ACT11_ARATH	R.TTGIVLDSGDGVSHTVPIYEGYALPHAILR.L	N	68.43	3150.64	30	-3.2	1051.22	3	20.67																								5767.8
26	26	P53496|ACT11_ARATH	K.AGFAGDDAPR.A	N	67.34	975.441	10	0.4	488.726	2	12.62					0		56381
26	26	P53496|ACT11_ARATH	K.VVAPPERK.Y	N	60.6	894.529	8	1.1	448.27	2	10.84				4862		11804										6906.3
23	17	Q9ZRA9|TBB4_WHEAT	R.YAGDSDLQLER.I	N	98.38	1265.59	11	1.4	633.8	2	14.74	4864.6				106920	41484	66540					255330				26313					9218		10049					18570					27213
23	17	Q9ZRA9|TBB4_WHEAT	K.NSSYFVEWIPNNVK.S	N	92.03	1695.83	14	-0.8	848.919	2	21.48	19971				41079										22613		0						43591		70037											28880
23	17	Q9ZRA9|TBB4_WHEAT	R.INVYYNEASGGR.F	N	91.7	1341.63	12	1	671.82	2	14.56				36779	77490	37217	63013			37653		249680			3851.1	29536		29922					7905.1			27830		12856					10975
23	17	Q9ZRA9|TBB4_WHEAT	K.EVDEQMLNVQNK.N	N	87.32	1445.68	12	1	723.845	2	14.74					64199		102590					185830									1927.5		5132								0		0
23	17	Q9ZRA9|TBB4_WHEAT	R.VSEQFTAMFR.R	N	80.87	1214.58	10	0.5	608.295	2	19.34							20047					44989			14414								20801		0								9878.8			16577	25727
23	17	Q9ZRA9|TBB4_WHEAT	K.LAVNLIPFPR.L	N	79.24	1138.69	10	1.7	570.349	2	22.33	47081				49216										40059	16561				6730.7			130830		75430		33863						13208			65946	34910
23	17	Q9ZRA9|TBB4_WHEAT	R.FPGQLNSDLR.K	N	76.14	1145.58	10	1.7	573.797	2	16.47								0				303780
23	17	Q9ZRA9|TBB4_WHEAT	R.AVLMDLEPGTMDSVR.S	N	71.31	1632.79	15	0.6	817.396	2	19.96					38867	5208.3	16690					48770			24032								32492		70774		6709.2						8194.6			22369		0
23	17	Q9ZRA9|TBB4_WHEAT	R.MMLTFSVFPSPK.V	N	68.75	1383.69	12	0.6	692.854	2	23.22																											5039.7									12097
23	17	Q9ZRA9|TBB4_WHEAT	K.GHYTEGAELIDSVLDVVR.K	N	67.03	1971.99	18	-2.3	658.338	3	23.76															1362.1												841.69
23	17	Q9ZRA9|TBB4_WHEAT	R.LHFFMVGFAPLTSR.G	N	66.75	1621.84	14	-2	541.622	3	22.99																											1792.3									4090.6		811.68
23	17	Q9ZRA9|TBB4_WHEAT	K.IREEYPDR.M	N	66.39	1076.53	8	0.8	539.268	2	11.2					139500	0	123960					295940				66204		123230
23	17	Q9ZRA9|TBB4_WHEAT	R.FPGQLNSDLRK.L	N	57.6	1273.68	11	-1	425.566	3	14.5												82078																9952
23	17	Q9ZRA9|TBB4_WHEAT	R.ALTVPELTQQMWDAK.N	N	56.63	1729.87	15	-0.8	865.938	2	21.7					12099										11094
23	17	Q9ZRA9|TBB4_WHEAT	R.KLAVNLIPFPR.L	N	51.27	1266.78	11	-2.3	423.267	3	20.47																									6480.2
27	21	Q9C7X7|HSP7N_ARATH	K.VQQLLQDFFNGK.E	N	105.8	1435.75	12	-0.3	718.88	2	21.83					16907																			85542											60692			110960
27	21	Q9C7X7|HSP7N_ARATH	R.IINEPTAAAIAYGLDKK.A	N	94.07	1786.98	17	-4.3	894.495	2	18.46				0					0	0			5751.3							131170	0			126000											10424			79981
27	21	Q9C7X7|HSP7N_ARATH	K.NAVVTVPAYFNDSQR.Q	N	91.72	1679.83	15	-0.4	840.917	2	18.51		22514		59757				29920	45504	36201	0		28102					66695		56419	90775					82025								57035	10464			40620
27	21	Q9C7X7|HSP7N_ARATH	R.IINEPTAAAIAYGLDK.K	N	89.61	1658.89	16	-1	830.45	2	19.95			2956.3	6291	6041.5		10600				6927.4							6936.8		46942				32037	10915	9788.9				4926.5			4180.6		24074			52572
27	21	Q9C7X7|HSP7N_ARATH	K.SINPDEAVAYGAAVQAAILSGEGNEK.V	N	85.18	2573.26	26	-0.9	1287.64	2	23.48															3744					21007				18980											16028			172460
27	21	Q9C7X7|HSP7N_ARATH	K.ATAGDTHLGGEDFDNR.M	N	82.27	1674.72	16	2.8	559.247	3	13.12			7506.2	59235	20180			80311	15834	35108	4798.8	30356	53774	16416		7092.4		54523		16759	41588			7411.4										61369
27	21	Q9C7X7|HSP7N_ARATH	R.TTPSYVAFTDSER.L	N	75.66	1472.68	13	-4.9	737.343	2	16.69				50142				73706		40690	29002	30453		17884				52725		15686	55397			23722					10794					85679	7519.4			1756.1
27	21	Q9C7X7|HSP7N_ARATH	K.FEEMNMDLFR.K	N	68.1	1330.57	10	-6.4	666.289	2	20.93																				4370
27	21	Q9C7X7|HSP7N_ARATH	K.QFAAEEISSMVLIK.M	N	67.84	1564.82	14	0.5	783.416	2	22.25																																						0
27	21	Q9C7X7|HSP7N_ARATH	K.ITITNDKGR.L	N	67.66	1016.56	9	1.8	509.286	2	11.22				45378						30549								27963		2927.8	32910			2533.6
27	21	Q9C7X7|HSP7N_ARATH	R.VEIIANDQGNR.T	N	64.73	1227.62	11	0.7	614.816	2	13.57														13193						6390.8														0
27	21	Q9C7X7|HSP7N_ARATH	R.MVNHFVQEFK.R	N	55.54	1277.62	10	-2.7	639.817	2	15.59				25398																22861	117380			19216
27	21	Q9C7X7|HSP7N_ARATH	K.ITITNDK.G	N	52.62	803.439	7	-1.6	402.724	2	12.14							18046
41	24	Q9ZRB7|TBA_WHEAT	K.TVGGGDDAFNTFFSETGAGK.H	N	104.98	1976.88	20	1.4	989.441	2	20.76	32416				108840							102870	2440		51923	7806.7	16296	13483	12256	6496.2		16109	84146	10372	50129					4483.9		28870	7358.1	8553.3		51737		14323
41	24	Q9ZRB7|TBA_WHEAT	K.DVNAAVATIK.T	Y	85.25	1000.56	10	0.1	501.283	2	15.18				1258300	219820	78803	97286					632100																124290			9287.9		43603
41	24	Q9ZRB7|TBA_WHEAT	R.AVFVDLEPTVIDEVR.T	N	83.6	1700.9	15	0.4	851.454	2	21.98																	19958						34634		0		15473					66456				20555		19383
41	24	Q9ZRB7|TBA_WHEAT	K.EDAANNFAR.G	N	82.47	1006.45	9	2.2	504.229	2	12.18					86605	13852	39682					289840				6239.6		9891.2					3420.7
41	24	Q9ZRB7|TBA_WHEAT	R.SLDIERPTYTNLNR.L	N	76.39	1690.86	14	1.8	564.627	3	15.71					200280							516510																									22953
41	24	Q9ZRB7|TBA_WHEAT	R.IHFMLSSYAPVISAEK.A	N	65.1	1791.92	16	-8.9	896.961	2	20.12					23233
41	24	Q9ZRB7|TBA_WHEAT	R.AFVHWYVGEGMEEGEFSEAR.E	N	64.86	2329.01	20	1.8	777.346	3	19.27																													8777.2
41	24	Q9ZRB7|TBA_WHEAT	R.QLFHPEQLISGKEDAANNFAR.G	N	55.13	2384.19	21	0.7	795.733	3	17.57					55201
41	24	Q9ZRB7|TBA_WHEAT	R.IDHKFDLMYAK.R	N	53.84	1379.69	11	1.5	460.903	3	15.71												80043
41	24	Q9ZRB7|TBA_WHEAT	K.FDLMYAK.R	N	53.68	886.426	7	1.2	444.219	2	17.94												42452
41	24	Q9ZRB7|TBA_WHEAT	K.AYHEQLSVAEITNSAFEPSSMMAK.C	Y	53.02	2640.22	24	3	881.083	3	20.11																																				0
33	37	P53492|ACT7_ARATH	R.VAPEEHPVLLTEAPLNPK.A	N	130.38	1953.06	18	1.4	652.024	3	17.76		28127	52589	152350	5119.4	268290	0	0	75273	89212		45788	0	31925		194840	12454	119010			202260					173490		311950	32594	4593.8	17164		29946	0
33	37	P53492|ACT7_ARATH	K.DAYVGDEAQSK.R	N	80.43	1181.52	11	1.8	591.766	2	11.66		22263	33007	31832		94392	30527	42001	42175		19719		35088	26805		60719																		45204
33	37	P53492|ACT7_ARATH	K.DAYVGDEAQSKR.G	N	78.81	1337.62	12	1.2	669.815	2	11.14		0	0			70161	0	20966				0		14480		45967		16492																60245
33	37	P53492|ACT7_ARATH	K.EITALAPSSMK.I	N	77.6	1146.6	11	0.5	574.302	2	16.07				0		163140	105370			0						112060		0			0					0		138110		28904	23102
33	37	P53492|ACT7_ARATH	R.AVFPSIVGRPR.H	N	74.26	1197.7	11	0.7	400.238	3	16.83
33	37	P53492|ACT7_ARATH	R.HTGVMVGMGQK.D	N	70.69	1143.55	11	1.7	572.782	2	12.61			10887			0						0									27084
33	37	P53492|ACT7_ARATH	R.TTGIVLDSGDGVSHTVPIYEGYALPHAILR.L	N	68.43	3150.64	30	-3.2	1051.22	3	20.67																								5767.8
33	37	P53492|ACT7_ARATH	K.AGFAGDDAPR.A	N	67.34	975.441	10	0.4	488.726	2	12.62					0		56381
33	37	P53492|ACT7_ARATH	K.VVAPPERK.Y	N	60.6	894.529	8	1.1	448.27	2	10.84				4862		11804										6906.3
33	37	P53492|ACT7_ARATH	K.LAYVALDYEQELETAK.S	Y	59.4	1854.92	16	-0.6	928.465	2	20.23																		8187.1
33	37	P53492|ACT7_ARATH	R.DLTDSLMK.I	Y	54.12	921.448	8	1.7	461.732	2	17.26																												29285
36	15	Q9ZRB1|TBB2_WHEAT	K.NSSYFVEWIPNNVK.S	N	92.03	1695.83	14	-0.8	848.919	2	21.48	19971				41079										22613		0						43591		70037											28880
36	15	Q9ZRB1|TBB2_WHEAT	R.YTGTSDLQLER.V	Y	89.52	1281.62	11	0.4	641.814	2	14.86						43827	28558					49218				0												25984					15122
36	15	Q9ZRB1|TBB2_WHEAT	K.EVDEQMINVQNK.N	N	87.32	1445.68	12	1	723.845	2	14.74					64199		102590					185830									1927.5		5132								0		0
36	15	Q9ZRB1|TBB2_WHEAT	R.YLTASAMFR.G	N	84.78	1058.52	9	1.8	530.266	2	18.26					43681	0	17371					102850			15553				0				41128	6707.7				14787				900.04	15929			12220	40725
36	15	Q9ZRB1|TBB2_WHEAT	K.LAVNLIPFPR.L	N	79.24	1138.69	10	1.7	570.349	2	22.33	47081				49216										40059	16561				6730.7			130830		75430		33863						13208			65946	34910
36	15	Q9ZRB1|TBB2_WHEAT	R.FPGQLNSDLR.K	N	76.14	1145.58	10	1.7	573.797	2	16.47								0				303780
36	15	Q9ZRB1|TBB2_WHEAT	R.AVLMDLEPGTMDSVR.T	N	71.31	1632.79	15	0.6	817.396	2	19.96					38867	5208.3	16690					48770			24032								32492		70774		6709.2						8194.6			22369		0
36	15	Q9ZRB1|TBB2_WHEAT	R.MMLTFSVFPSPK.V	N	68.75	1383.69	12	0.6	692.854	2	23.22																											5039.7									12097
36	15	Q9ZRB1|TBB2_WHEAT	K.GHYTEGAELIDSVLDVVR.K	N	67.03	1971.99	18	-2.3	658.338	3	23.76															1362.1												841.69
36	15	Q9ZRB1|TBB2_WHEAT	R.LHFFMVGFAPLTSR.G	N	66.75	1621.84	14	-2	541.622	3	22.99																											1792.3									4090.6		811.68
36	15	Q9ZRB1|TBB2_WHEAT	K.IREEYPDR.M	N	66.39	1076.53	8	0.8	539.268	2	11.2					139500	0	123960					295940				66204		123230
36	15	Q9ZRB1|TBB2_WHEAT	R.FPGQLNSDLRK.L	N	57.6	1273.68	11	-1	425.566	3	14.5												82078																9952
36	15	Q9ZRB1|TBB2_WHEAT	R.ALTVPELTQQMWDAK.N	N	56.63	1729.87	15	-0.8	865.938	2	21.7					12099										11094
36	15	Q9ZRB1|TBB2_WHEAT	R.KLAVNLIPFPR.L	N	51.27	1266.78	11	-2.3	423.267	3	20.47																									6480.2
17	81	O50008|METE1_ARATH	K.GMLTGPVTILNWSFVR.N	Y	107.97	1789.95	16	-0.5	895.984	2	25.76																				6399.9				12592														81839
17	81	O50008|METE1_ARATH	K.FALESFWDGK.S	Y	106.73	1198.57	10	-1.2	600.289	2	21.99																																						684750
17	81	O50008|METE1_ARATH	K.YLFAGVVDGR.N	Y	95.2	1095.57	10	-1.6	548.792	2	19.28						0													0	374140		0		428830				0							139760	9347.4		574970
17	81	O50008|METE1_ARATH	K.LNLPILPTTTIGSFPQTVELR.R	Y	94.4	2309.3	21	5.8	1155.66	2	24.65																				10867				22271											16935			93070
17	81	O50008|METE1_ARATH	K.KLNLPILPTTTIGSFPQTVELR.R	Y	88.15	2437.39	22	0.1	813.472	3	22.78																								47870														95070
17	81	O50008|METE1_ARATH	K.LDDEIKSWLAFAAQK.V	Y	84.67	1733.9	15	-0.6	578.973	3	22.43																																						11817
17	81	O50008|METE1_ARATH	K.SWLAFAAQK.V	Y	82.34	1020.54	9	-0.5	511.277	2	19.73																								230630											103300			253580
17	81	O50008|METE1_ARATH	K.ALGVDTVPVLVGPVSYLLLSK.A	Y	77.53	2139.26	21	-1.2	1070.63	2	27.49																				31489				427850														1077200
17	81	O50008|METE1_ARATH	K.SEHAFYLDWAVHSFR.I	Y	73.24	1863.87	15	0.5	932.942	2	20.34																				5627.1																		17218
38	20	P29516|TBB8_ARATH	K.NSSYFVEWIPNNVK.S	N	92.03	1695.83	14	-0.8	848.919	2	21.48	19971				41079										22613		0						43591		70037											28880
38	20	P29516|TBB8_ARATH	K.EVDEQMINVQNK.N	N	87.32	1445.68	12	1	723.845	2	14.74					64199		102590					185830									1927.5		5132								0		0
38	20	P29516|TBB8_ARATH	R.YLTASAMFR.G	N	84.78	1058.52	9	1.8	530.266	2	18.26					43681	0	17371					102850			15553				0				41128	6707.7				14787				900.04	15929			12220	40725
38	20	P29516|TBB8_ARATH	R.VSEQFTAMFR.R	N	80.87	1214.58	10	0.5	608.295	2	19.34							20047					44989			14414								20801		0								9878.8			16577	25727
38	20	P29516|TBB8_ARATH	K.LAVNLIPFPR.L	N	79.24	1138.69	10	1.7	570.349	2	22.33	47081				49216										40059	16561				6730.7			130830		75430		33863						13208			65946	34910
38	20	P29516|TBB8_ARATH	R.FPGQLNSDLR.K	N	76.14	1145.58	10	1.7	573.797	2	16.47								0				303780
38	20	P29516|TBB8_ARATH	R.AVLMDLEPGTMDSVR.S	N	71.31	1632.79	15	0.6	817.396	2	19.96					38867	5208.3	16690					48770			24032								32492		70774		6709.2						8194.6			22369		0
38	20	P29516|TBB8_ARATH	R.MMLTFSVFPSPK.V	N	68.75	1383.69	12	0.6	692.854	2	23.22																											5039.7									12097
38	20	P29516|TBB8_ARATH	R.SGPYGQIFRPDNFVFGQSGAGNNWAK.G	N	68.01	2813.33	26	-1.4	938.779	3	20.76															0								16473
38	20	P29516|TBB8_ARATH	K.GHYTEGAELIDSVLDVVR.K	N	67.03	1971.99	18	-2.3	658.338	3	23.76															1362.1												841.69
38	20	P29516|TBB8_ARATH	R.LHFFMVGFAPLTSR.G	N	66.75	1621.84	14	-2	541.622	3	22.99																											1792.3									4090.6		811.68
38	20	P29516|TBB8_ARATH	K.IREEYPDR.M	N	66.39	1076.53	8	0.8	539.268	2	11.2					139500	0	123960					295940				66204		123230
38	20	P29516|TBB8_ARATH	R.FPGQLNSDLRK.L	N	57.6	1273.68	11	-1	425.566	3	14.5												82078																9952
38	20	P29516|TBB8_ARATH	R.ALTVPELTQQMWDAK.N	N	56.63	1729.87	15	-0.8	865.938	2	21.7					12099										11094
38	20	P29516|TBB8_ARATH	R.KLAVNLIPFPR.L	N	51.27	1266.78	11	-2.3	423.267	3	20.47																									6480.2
30	13	Q9ZRA8|TBB5_WHEAT	K.NSSYFVEWIPNNVK.S	N	92.03	1695.83	14	-0.8	848.919	2	21.48	19971				41079										22613		0						43591		70037											28880
30	13	Q9ZRA8|TBB5_WHEAT	K.EVDEQMINVQNK.N	N	87.32	1445.68	12	1	723.845	2	14.74					64199		102590					185830									1927.5		5132								0		0
30	13	Q9ZRA8|TBB5_WHEAT	R.YLTASAMFR.G	N	84.78	1058.52	9	1.8	530.266	2	18.26					43681	0	17371					102850			15553				0				41128	6707.7				14787				900.04	15929			12220	40725
30	13	Q9ZRA8|TBB5_WHEAT	R.YVGTSDLQLER.V	Y	83.93	1279.64	11	1.3	640.825	2	15.87					50130		27776			50853		131610																95525		4031.4	5041.5		0
30	13	Q9ZRA8|TBB5_WHEAT	R.VSEQFTAMFR.R	N	80.87	1214.58	10	0.5	608.295	2	19.34							20047					44989			14414								20801		0								9878.8			16577	25727
30	13	Q9ZRA8|TBB5_WHEAT	K.LAVNLIPFPR.L	N	79.24	1138.69	10	1.7	570.349	2	22.33	47081				49216										40059	16561				6730.7			130830		75430		33863						13208			65946	34910
30	13	Q9ZRA8|TBB5_WHEAT	R.FPGQLNSDLR.K	N	76.14	1145.58	10	1.7	573.797	2	16.47								0				303780
30	13	Q9ZRA8|TBB5_WHEAT	R.AVLMDLEPGTMDSVR.T	N	71.31	1632.79	15	0.6	817.396	2	19.96					38867	5208.3	16690					48770			24032								32492		70774		6709.2						8194.6			22369		0
30	13	Q9ZRA8|TBB5_WHEAT	R.MMLTFSVFPSPK.V	N	68.75	1383.69	12	0.6	692.854	2	23.22																											5039.7									12097
30	13	Q9ZRA8|TBB5_WHEAT	K.GHYTEGAELIDSVLDVVR.K	N	67.03	1971.99	18	-2.3	658.338	3	23.76															1362.1												841.69
30	13	Q9ZRA8|TBB5_WHEAT	R.LHFFMVGFAPLTSR.G	N	66.75	1621.84	14	-2	541.622	3	22.99																											1792.3									4090.6		811.68
30	13	Q9ZRA8|TBB5_WHEAT	K.IREEYPDR.M	N	66.39	1076.53	8	0.8	539.268	2	11.2					139500	0	123960					295940				66204		123230
30	13	Q9ZRA8|TBB5_WHEAT	R.FPGQLNSDLRK.L	N	57.6	1273.68	11	-1	425.566	3	14.5												82078																9952
30	13	Q9ZRA8|TBB5_WHEAT	R.KLAVNLIPFPR.L	N	51.27	1266.78	11	-2.3	423.267	3	20.47																									6480.2
30	16	Q9ZRB2|TBB1_WHEAT	K.NSSYFVEWIPNNVK.S	N	92.03	1695.83	14	-0.8	848.919	2	21.48	19971				41079										22613		0						43591		70037											28880
30	16	Q9ZRB2|TBB1_WHEAT	K.EVDEQMINVQNK.N	N	87.32	1445.68	12	1	723.845	2	14.74					64199		102590					185830									1927.5		5132								0		0
30	16	Q9ZRB2|TBB1_WHEAT	R.YLTASAMFR.G	N	84.78	1058.52	9	1.8	530.266	2	18.26					43681	0	17371					102850			15553				0				41128	6707.7				14787				900.04	15929			12220	40725
30	16	Q9ZRB2|TBB1_WHEAT	R.YVGTSDLQLER.V	Y	83.93	1279.64	11	1.3	640.825	2	15.87					50130		27776			50853		131610																95525		4031.4	5041.5		0
30	16	Q9ZRB2|TBB1_WHEAT	R.VSEQFTAMFR.R	N	80.87	1214.58	10	0.5	608.295	2	19.34							20047					44989			14414								20801		0								9878.8			16577	25727
30	16	Q9ZRB2|TBB1_WHEAT	K.LAVNLIPFPR.L	N	79.24	1138.69	10	1.7	570.349	2	22.33	47081				49216										40059	16561				6730.7			130830		75430		33863						13208			65946	34910
30	16	Q9ZRB2|TBB1_WHEAT	R.FPGQLNSDLR.K	N	76.14	1145.58	10	1.7	573.797	2	16.47								0				303780
30	16	Q9ZRB2|TBB1_WHEAT	R.AVLMDLEPGTMDSVR.T	N	71.31	1632.79	15	0.6	817.396	2	19.96					38867	5208.3	16690					48770			24032								32492		70774		6709.2						8194.6			22369		0
30	16	Q9ZRB2|TBB1_WHEAT	R.MMLTFSVFPSPK.V	N	68.75	1383.69	12	0.6	692.854	2	23.22																											5039.7									12097
30	16	Q9ZRB2|TBB1_WHEAT	K.GHYTEGAELIDSVLDVVR.K	N	67.03	1971.99	18	-2.3	658.338	3	23.76															1362.1												841.69
30	16	Q9ZRB2|TBB1_WHEAT	R.LHFFMVGFAPLTSR.G	N	66.75	1621.84	14	-2	541.622	3	22.99																											1792.3									4090.6		811.68
30	16	Q9ZRB2|TBB1_WHEAT	K.IREEYPDR.M	N	66.39	1076.53	8	0.8	539.268	2	11.2					139500	0	123960					295940				66204		123230
30	16	Q9ZRB2|TBB1_WHEAT	R.FPGQLNSDLRK.L	N	57.6	1273.68	11	-1	425.566	3	14.5												82078																9952
30	16	Q9ZRB2|TBB1_WHEAT	R.KLAVNLIPFPR.L	N	51.27	1266.78	11	-2.3	423.267	3	20.47																									6480.2
76	39	P38076|CYSK_WHEAT	K.DVTELIGNTPLVYLNK.V	Y	104.48	1787.97	16	-5.5	894.99	2	23.89						14953										0
76	39	P38076|CYSK_WHEAT	R.IGYSMITDAEEK.G	N	100.83	1355.63	12	-0.5	678.818	2	16.82		9250.5				211980										130870												116670
76	39	P38076|CYSK_WHEAT	K.IDGLVSGIGTGGTITGTGK.Y	Y	98.99	1702.91	19	-0.3	852.462	2	18.18						175180										137620												242180
76	39	P38076|CYSK_WHEAT	K.IHYETTGPEIWK.G	Y	92.49	1472.73	12	-0.7	737.368	2	16.24						98549										102270												86195
76	39	P38076|CYSK_WHEAT	K.YLQEQNPNIK.L	Y	85.13	1245.64	10	1.5	623.823	2	12.88						113680										56075
76	39	P38076|CYSK_WHEAT	K.EGLLVGISSGAAAAAAIK.V	Y	83.56	1597.9	18	-0.9	799.955	2	20.76						23799										24819												10572
76	39	P38076|CYSK_WHEAT	R.LVLTMPASMSMER.R	Y	77.97	1464.71	13	-0.6	733.36	2	20.2																27503
76	39	P38076|CYSK_WHEAT	K.SVLIEPTSGNTGIGLAFMAAAK.G	Y	59.45	2147.13	22	0.3	1074.57	2	22.86																0
76	39	P38076|CYSK_WHEAT	R.YLSSVLFHSIK.K	Y	57.55	1292.71	11	1.6	647.362	2	18.71																18509
76	39	P38076|CYSK_WHEAT	K.TPNSYILQQFENAANPK.I	Y	57.22	1933.95	17	0.7	967.985	2	21.18																23505
31	100	P22738|RL32_ARATH	R.HGSLGFLPR.K	N	98.45	982.535	9	0.3	492.272	2	16.15					419810		477930					132490													5531.4	0					88278		329110
31	100	P22738|RL32_ARATH	K.AGMTHIVR.D	N	91.23	883.47	8	0.5	442.74	2	11.68					140300		303170			0		73843
31	100	P22738|RL32_ARATH	K.GYEGVVTR.W	N	82.85	879.445	8	-0.9	440.727	2	12.68					168960		362740					106120									0
31	100	P22738|RL32_ARATH	K.DEMIDIIGVTK.G	N	80.84	1232.63	11	-0.3	617.323	2	20.69					12945		21010																										10258
31	100	P22738|RL32_ARATH	K.GKGYEGVVTR.W	N	73.84	1064.56	10	-0.6	533.285	2	11.66					120050		421770	20786		13916		86558									27509
31	100	P22738|RL32_ARATH	R.VLAHTQIR.K	N	65.2	936.551	8	-0.3	469.281	2	11.26					290140		796740					174340																						12368
21	11	O65719|HSP7C_ARATH	R.IINEPTAAAIAYGLDKK.A	N	94.07	1786.98	17	-4.3	894.495	2	18.46				0					0	0			5751.3							131170	0			126000											10424			79981
21	11	O65719|HSP7C_ARATH	K.NAVVTVPAYFNDSQR.Q	N	91.72	1679.83	15	-0.4	840.917	2	18.51		22514		59757				29920	45504	36201	0		28102					66695		56419	90775					82025								57035	10464			40620
21	11	O65719|HSP7C_ARATH	R.IINEPTAAAIAYGLDK.K	N	89.61	1658.89	16	-1	830.45	2	19.95			2956.3	6291	6041.5		10600				6927.4							6936.8		46942				32037	10915	9788.9				4926.5			4180.6		24074			52572
21	11	O65719|HSP7C_ARATH	K.SINPDEAVAYGAAVQAAILSGEGNEK.V	N	85.18	2573.26	26	-0.9	1287.64	2	23.48															3744					21007				18980											16028			172460
21	11	O65719|HSP7C_ARATH	K.ATAGDTHLGGEDFDNR.M	N	82.27	1674.72	16	2.8	559.247	3	13.12			7506.2	59235	20180			80311	15834	35108	4798.8	30356	53774	16416		7092.4		54523		16759	41588			7411.4										61369
21	11	O65719|HSP7C_ARATH	K.NALENYAYNMR.N	N	82.13	1357.61	11	-5.1	679.808	2	16.84																				10421				7866											1933.3
21	11	O65719|HSP7C_ARATH	K.NQVAMNPINTVFDAK.R	Y	78.71	1660.82	15	-0.8	831.419	2	20.4																					30338			24536										14449				57003
21	11	O65719|HSP7C_ARATH	R.TTPSYVAFTDSER.L	N	75.66	1472.68	13	-4.9	737.343	2	16.69				50142				73706		40690	29002	30453		17884				52725		15686	55397			23722					10794					85679	7519.4			1756.1
21	11	O65719|HSP7C_ARATH	K.ITITNDKGR.L	N	67.66	1016.56	9	1.8	509.286	2	11.22				45378						30549								27963		2927.8	32910			2533.6
21	11	O65719|HSP7C_ARATH	K.EQVFSTYSDNQPGVLIQVYEGER.A	N	67.57	2657.26	23	-2.8	1329.63	2	21.2																								6171.7														4709.2
21	11	O65719|HSP7C_ARATH	R.VEIIANDQGNR.T	N	64.73	1227.62	11	0.7	614.816	2	13.57														13193						6390.8														0
21	11	O65719|HSP7C_ARATH	R.MVNHFVQEFK.R	N	55.54	1277.62	10	-2.7	639.817	2	15.59				25398																22861	117380			19216
21	11	O65719|HSP7C_ARATH	R.NTTIPTKK.E	N	54.48	901.523	8	-7.9	451.766	2	10.66																				1842.1
21	11	O65719|HSP7C_ARATH	K.DAGVIAGLNVMR.I	N	54.09	1214.64	12	-0.2	608.329	2	19.95																																						10543
21	11	O65719|HSP7C_ARATH	K.ITITNDK.G	N	52.62	803.439	7	-1.6	402.724	2	12.14							18046
32	84	P17094|RL31_ARATH	R.HGSLGFLPR.K	N	98.45	982.535	9	0.3	492.272	2	16.15					419810		477930					132490													5531.4	0					88278		329110
32	84	P17094|RL31_ARATH	K.AGMTHIVR.E	N	91.23	883.47	8	0.5	442.74	2	11.68					140300		303170			0		73843
32	84	P17094|RL31_ARATH	K.GYEGVVTR.W	N	82.85	879.445	8	-0.9	440.727	2	12.68					168960		362740					106120									0
32	84	P17094|RL31_ARATH	K.DEMIDIIGVTK.G	N	80.84	1232.63	11	-0.3	617.323	2	20.69					12945		21010																										10258
32	84	P17094|RL31_ARATH	K.GKGYEGVVTR.W	N	73.84	1064.56	10	-0.6	533.285	2	11.66					120050		421770	20786		13916		86558									27509
32	84	P17094|RL31_ARATH	R.VLAHTQIR.K	N	65.2	936.551	8	-0.3	469.281	2	11.26					290140		796740					174340																						12368
32	84	P17094|RL31_ARATH	R.LALEEIKLK.F	Y	56.4	1055.66	9	1	528.837	2	17.44																														8049	30405		50372
56	41	P55737|HS902_ARATH	K.GIVDSEDLPLNISR.E	N	105.17	1526.79	14	0.4	764.404	2	19.78	6250.1				54048							0					10723			76876				118730											37429			164330
56	41	P55737|HS902_ARATH	K.SGDELTSLKDYVTR.M	N	80.52	1582.78	14	-4.2	792.396	2	17.72																				26896				35216														63327
56	41	P55737|HS902_ARATH	R.DSSMAGYMSSK.K	Y	77.59	1162.46	11	-4.3	582.236	2	14.16																								4328.6
56	41	P55737|HS902_ARATH	K.HNDDEQYVWESQAGGSFTVTR.D	N	73.81	2425.06	21	-3.6	809.357	3	17.65																								9375.8														6784
56	41	P55737|HS902_ARATH	R.ELISNSSDALDK.I	N	71.76	1290.63	12	-5.9	646.32	2	14.61				14691																10242				13160
56	41	P55737|HS902_ARATH	K.TMEINPENSIMDELR.K	N	66.17	1790.82	15	1.4	896.418	2	20.23																								7612.9														10645
56	41	P55737|HS902_ARATH	K.HFSVEGQLEFK.A	N	64.4	1319.65	11	-5.9	660.829	2	16.87																				9558.6				13555														5824.1
56	41	P55737|HS902_ARATH	R.KPEEINKEEYAAFYK.S	N	63.49	1857.91	15	-1.9	620.311	3	14.64																								11426
56	41	P55737|HS902_ARATH	K.AVENSPFLEK.L	N	63.37	1132.58	10	-0.1	567.295	2	15.86																																			2505.9
56	41	P55737|HS902_ARATH	K.LGIHEDSQNR.T	N	62.72	1167.56	10	0.3	584.786	2	11.35												0				0				4616.2				9834.4
56	41	P55737|HS902_ARATH	K.KAVENSPFLEK.L	N	61.8	1260.67	11	-6.1	631.34	2	13.93																				11997
56	41	P55737|HS902_ARATH	R.ELISNSSDALDKIR.F	N	58.76	1559.82	14	-4.4	780.912	2	16.14																				10234				27568
56	41	P55737|HS902_ARATH	K.QKPIWMR.K	N	58.43	957.522	7	-7.1	479.766	2	15.14																				10206
56	41	P55737|HS902_ARATH	K.FYEAFSK.N	N	57.22	890.417	7	-2.8	446.215	2	15.43																								6463.7
56	41	P55737|HS902_ARATH	K.SGDELTSLK.D	N	56.2	948.476	9	-3.1	475.244	2	14.23																								5604.8
56	41	P55737|HS902_ARATH	K.TMEINPENSIMDELRK.R	N	55.82	1918.91	16	0.7	640.645	3	19.07																																						0
15	92	Q9FJA6|RS33_ARATH	R.ELAEDGYSGVEVR.V	Y	111.85	1422.66	13	-1.2	712.335	2	15.21		0	0	153460					35181	139110	38459		891980	30375				341930			334440					123500								1289000
15	92	Q9FJA6|RS33_ARATH	R.TQNVLGEK.G	Y	84.62	887.471	8	-1.1	444.74	2	12.16		0	0	61693				795830					391900					120610			132080													444650
15	92	Q9FJA6|RS33_ARATH	R.FVMESGAK.G	Y	78.14	867.416	8	-0.7	434.713	2	13.24				11345				400230					170430					23804			53507													204660
15	92	Q9FJA6|RS33_ARATH	K.IMLDWDPK.G	Y	68.22	1016.5	8	0	509.255	2	19.42								196480
15	92	Q9FJA6|RS33_ARATH	K.LLGGLAVR.R	Y	51.27	797.512	8	-1	399.761	2	17.23													903410
81	27	Q9LZF6|CD48E_ARATH	R.VLNQLLTEMDGMNAK.K	N	92.81	1675.83	15	0.4	838.921	2	20.83																	27307					31125										71856
81	27	Q9LZF6|CD48E_ARATH	R.ETVVEVPNVSWEDIGGLENVKR.E	N	86.17	2468.25	22	-4.1	823.755	3	20.97																	26951
81	27	Q9LZF6|CD48E_ARATH	R.ETVVEVPNVSWEDIGGLENVK.R	N	83.75	2312.15	21	-5.9	1157.08	2	22.28																																17058
81	27	Q9LZF6|CD48E_ARATH	K.NAPSIIFIDEIDSIAPK.R	N	81.47	1841.98	17	-0.4	921.996	2	24.81																			14230													73793						11868
81	27	Q9LZF6|CD48E_ARATH	R.AAHFEESMK.Y	Y	74.63	1048.46	9	-1.5	525.239	2	11.72
81	27	Q9LZF6|CD48E_ARATH	R.KYQAFAQTLQQSR.G	N	72.12	1567.81	13	-2.4	523.61	3	14.53																	4502.8
81	27	Q9LZF6|CD48E_ARATH	K.YQAFAQTLQQSR.G	N	67.4	1439.72	12	-3.4	720.863	2	15.86																	8016.3					4946.6
81	27	Q9LZF6|CD48E_ARATH	K.LAGESESNLR.K	N	64.24	1074.53	10	-2.5	538.271	2	11.97																	8368.8					4862.5
81	27	Q9LZF6|CD48E_ARATH	K.SIGVKPPK.G	N	61.24	824.512	8	-4.2	413.262	2	11.76
81	27	Q9LZF6|CD48E_ARATH	R.KGDLFLVR.G	N	54.82	946.56	8	0.4	474.287	2	16.62																	55246															7290.9
81	27	Q9LZF6|CD48E_ARATH	K.GDLFLVR.G	N	52.01	818.465	7	8.5	410.243	2	19.09
81	27	Q9LZF6|CD48E_ARATH	R.GFGSEFR.F	N	51.96	798.366	7	-5.1	400.188	2	14.98																						7379.4
79	25	Q9SCN8|CD48D_ARATH	R.VLNQLLTEMDGMNAK.K	N	92.81	1675.83	15	0.4	838.921	2	20.83																	27307					31125										71856
79	25	Q9SCN8|CD48D_ARATH	R.ETVVEVPNVSWEDIGGLENVKR.E	N	86.17	2468.25	22	-4.1	823.755	3	20.97																	26951
79	25	Q9SCN8|CD48D_ARATH	R.ETVVEVPNVSWEDIGGLENVK.R	N	83.75	2312.15	21	-5.9	1157.08	2	22.28																																17058
79	25	Q9SCN8|CD48D_ARATH	K.NAPSIIFIDEIDSIAPK.R	N	81.47	1841.98	17	-0.4	921.996	2	24.81																			14230													73793						11868
79	25	Q9SCN8|CD48D_ARATH	R.KYQAFAQTLQQSR.G	N	72.12	1567.81	13	-2.4	523.61	3	14.53																	4502.8
79	25	Q9SCN8|CD48D_ARATH	K.YQAFAQTLQQSR.G	N	67.4	1439.72	12	-3.4	720.863	2	15.86																	8016.3					4946.6
79	25	Q9SCN8|CD48D_ARATH	K.LAGESESNLR.K	N	64.24	1074.53	10	-2.5	538.271	2	11.97																	8368.8					4862.5
79	25	Q9SCN8|CD48D_ARATH	K.SIGVKPPK.G	N	61.24	824.512	8	-4.2	413.262	2	11.76
79	25	Q9SCN8|CD48D_ARATH	R.KGDLFLVR.G	N	54.82	946.56	8	0.4	474.287	2	16.62																	55246															7290.9
79	25	Q9SCN8|CD48D_ARATH	K.GDLFLVR.G	N	52.01	818.465	7	8.5	410.243	2	19.09
79	25	Q9SCN8|CD48D_ARATH	R.GFGSEFR.F	N	51.96	798.366	7	-5.1	400.188	2	14.98																						7379.4
57	38	O03986|HS904_ARATH	K.GIVDSEDLPLNISR.E	N	105.17	1526.79	14	0.4	764.404	2	19.78	6250.1				54048							0					10723			76876				118730											37429			164330
57	38	O03986|HS904_ARATH	K.SGDELTSLKDYVTR.M	N	80.52	1582.78	14	-4.2	792.396	2	17.72																				26896				35216														63327
57	38	O03986|HS904_ARATH	K.HNDDEQYVWESQAGGSFTVTR.D	N	73.81	2425.06	21	-3.6	809.357	3	17.65																								9375.8														6784
57	38	O03986|HS904_ARATH	R.ELISNSSDALDK.I	N	71.76	1290.63	12	-5.9	646.32	2	14.61				14691																10242				13160
57	38	O03986|HS904_ARATH	K.TMEINPENSIMDELR.K	N	66.17	1790.82	15	1.4	896.418	2	20.23																								7612.9														10645
57	38	O03986|HS904_ARATH	K.HFSVEGQLEFK.A	N	64.4	1319.65	11	-5.9	660.829	2	16.87																				9558.6				13555														5824.1
57	38	O03986|HS904_ARATH	R.KPEEINKEEYAAFYK.S	N	63.49	1857.91	15	-1.9	620.311	3	14.64																								11426
57	38	O03986|HS904_ARATH	K.AVENSPFLEK.L	N	63.37	1132.58	10	-0.1	567.295	2	15.86																																			2505.9
57	38	O03986|HS904_ARATH	K.LGIHEDSQNR.T	N	62.72	1167.56	10	0.3	584.786	2	11.35												0				0				4616.2				9834.4
57	38	O03986|HS904_ARATH	K.KAVENSPFLEK.L	N	61.8	1260.67	11	-6.1	631.34	2	13.93																				11997
57	38	O03986|HS904_ARATH	R.ELISNSSDALDKIR.F	N	58.76	1559.82	14	-4.4	780.912	2	16.14																				10234				27568
57	38	O03986|HS904_ARATH	K.QKPIWMR.K	N	58.43	957.522	7	-7.1	479.766	2	15.14																				10206
57	38	O03986|HS904_ARATH	K.FYEAFSK.N	N	57.22	890.417	7	-2.8	446.215	2	15.43																								6463.7
57	38	O03986|HS904_ARATH	K.SGDELTSLK.D	N	56.2	948.476	9	-3.1	475.244	2	14.23																								5604.8
57	38	O03986|HS904_ARATH	K.TMEINPENSIMDELRK.R	N	55.82	1918.91	16	0.7	640.645	3	19.07																																						0
57	38	O03986|HS904_ARATH	K.GYEVLYMVDAIDEYAIGQLK.E	Y	51.36	2289.12	20	1.2	1145.57	2	27.34																																						6775.1
42	28	P29514|TBB6_ARATH	K.NSSYFVEWIPNNVK.S	N	92.03	1695.83	14	-0.8	848.919	2	21.48	19971				41079										22613		0						43591		70037											28880
42	28	P29514|TBB6_ARATH	K.EVDEQMINVQNK.N	N	87.32	1445.68	12	1	723.845	2	14.74					64199		102590					185830									1927.5		5132								0		0
42	28	P29514|TBB6_ARATH	R.YLTASAMFR.G	N	84.78	1058.52	9	1.8	530.266	2	18.26					43681	0	17371					102850			15553				0				41128	6707.7				14787				900.04	15929			12220	40725
42	28	P29514|TBB6_ARATH	R.VSEQFTAMFR.R	N	80.87	1214.58	10	0.5	608.295	2	19.34							20047					44989			14414								20801		0								9878.8			16577	25727
42	28	P29514|TBB6_ARATH	K.LAVNLIPFPR.L	N	79.24	1138.69	10	1.7	570.349	2	22.33	47081				49216										40059	16561				6730.7			130830		75430		33863						13208			65946	34910
42	28	P29514|TBB6_ARATH	R.FPGQLNSDLR.K	N	76.14	1145.58	10	1.7	573.797	2	16.47								0				303780
42	28	P29514|TBB6_ARATH	R.MMLTFSVFPSPK.V	N	68.75	1383.69	12	0.6	692.854	2	23.22																											5039.7									12097
42	28	P29514|TBB6_ARATH	R.LHFFMVGFAPLTSR.G	N	66.75	1621.84	14	-2	541.622	3	22.99																											1792.3									4090.6		811.68
42	28	P29514|TBB6_ARATH	K.IREEYPDR.M	N	66.39	1076.53	8	0.8	539.268	2	11.2					139500	0	123960					295940				66204		123230
42	28	P29514|TBB6_ARATH	R.ALTVPELTQQMWDSK.N	N	63.15	1745.87	15	-1.4	873.942	2	21.65																							19293				3516.5
42	28	P29514|TBB6_ARATH	R.FPGQLNSDLRK.L	N	57.6	1273.68	11	-1	425.566	3	14.5												82078																9952
42	28	P29514|TBB6_ARATH	R.KLAVNLIPFPR.L	N	51.27	1266.78	11	-2.3	423.267	3	20.47																									6480.2
71	33	Q5GM68|CAPP2_ARATH	K.NQTVDLVLTAHPTQSVR.R	N	100.86	1878	17	-1.1	940.004	2	16.88																	15801		9311.7			12812
71	33	Q5GM68|CAPP2_ARATH	K.VSEDDKLIEYDALLLDR.F	Y	93.45	2006.02	17	-2.8	1004.01	2	21.11																	13447		3907.5													35216
71	33	Q5GM68|CAPP2_ARATH	R.LLLQVAGHK.D	Y	75.85	977.602	9	2.5	489.81	2	15.27																	10681															1998
71	33	Q5GM68|CAPP2_ARATH	R.VPYNAPLIQFSSWMGGDR.D	N	74.73	2036.98	18	-3.4	1019.49	2	24.08																	7307.5															16881
71	33	Q5GM68|CAPP2_ARATH	K.HYIEFWK.Q	N	73.3	1021.5	7	0.5	511.759	2	17.49																	40969					25340										6403.6
71	33	Q5GM68|CAPP2_ARATH	K.GDFADEASATTESDIEETLKR.L	Y	69.99	2284.03	21	-5.9	762.347	3	18.98																	4100.7
71	33	Q5GM68|CAPP2_ARATH	R.AGMSYFHETIWK.G	N	66.68	1468.68	12	-3.5	735.345	2	18.14
71	33	Q5GM68|CAPP2_ARATH	R.VVPLFEK.L	N	63.24	830.49	7	-2.1	416.252	2	17.79																	0					49455										5515.4
71	33	Q5GM68|CAPP2_ARATH	K.QEVMIGYSDSGK.D	N	63.2	1312.6	12	-3.1	657.304	2	15.03																	1893.1		2148.9			2875.8
71	33	Q5GM68|CAPP2_ARATH	R.AIPWIFAWTQTR.F	N	62.62	1488.79	12	-4.8	745.398	2	25.45
71	33	Q5GM68|CAPP2_ARATH	K.DITPDDKQELDEALQR.E	N	58.41	1884.91	16	-2.3	943.458	2	16.53
71	33	Q5GM68|CAPP2_ARATH	R.KPSGGIESLR.A	N	56.26	1042.58	10	-4	522.294	2	12.41
71	33	Q5GM68|CAPP2_ARATH	K.LTMFHGR.G	N	50.32	860.433	7	-5	431.221	2	13.35																	7621.3
59	29	Q9MAH0|CAPP1_ARATH	K.NQTVDLVLTAHPTQSVR.R	N	100.86	1878	17	-1.1	940.004	2	16.88																	15801		9311.7			12812
59	29	Q9MAH0|CAPP1_ARATH	R.ALLDEMAVVATEEYR.S	Y	89.13	1708.83	15	-5.4	855.42	2	22.34																	43817					34841
59	29	Q9MAH0|CAPP1_ARATH	R.GGGPTHLAILSQPPDTINGSLR.V	Y	75.65	2200.16	22	-0.8	734.393	3	18.54																	0
59	29	Q9MAH0|CAPP1_ARATH	R.VPYNAPLIQFSSWMGGDR.D	N	74.73	2036.98	18	-3.4	1019.49	2	24.08																	7307.5															16881
59	29	Q9MAH0|CAPP1_ARATH	K.HYIEFWK.S	N	73.3	1021.5	7	0.5	511.759	2	17.49																	40969					25340										6403.6
59	29	Q9MAH0|CAPP1_ARATH	R.AGMSYFHETIWK.G	N	66.68	1468.68	12	-3.5	735.345	2	18.14
59	29	Q9MAH0|CAPP1_ARATH	R.VVPLFEK.L	N	63.24	830.49	7	-2.1	416.252	2	17.79																	0					49455										5515.4
59	29	Q9MAH0|CAPP1_ARATH	K.QEVMIGYSDSGK.D	N	63.2	1312.6	12	-3.1	657.304	2	15.03																	1893.1		2148.9			2875.8
59	29	Q9MAH0|CAPP1_ARATH	R.AIPWIFAWTQTR.F	N	62.62	1488.79	12	-4.8	745.398	2	25.45
59	29	Q9MAH0|CAPP1_ARATH	K.DITPDDKQELDEALQR.E	N	58.41	1884.91	16	-2.3	943.458	2	16.53
59	29	Q9MAH0|CAPP1_ARATH	R.KPSGGIESLR.A	N	56.26	1042.58	10	-4	522.294	2	12.41
59	29	Q9MAH0|CAPP1_ARATH	K.LADLEAAPAAVAR.L	Y	54.39	1266.69	13	-5.3	634.351	2	16.49																	5430.4					3376.3
59	29	Q9MAH0|CAPP1_ARATH	K.LTMFHGR.G	N	50.32	860.433	7	-5	431.221	2	13.35																	7621.3
55	54	P29511|TBA6_ARATH	K.TVGGGDDAFNTFFSETGAGK.H	N	104.98	1976.88	20	1.4	989.441	2	20.76	32416				108840							102870	2440		51923	7806.7	16296	13483	12256	6496.2		16109	84146	10372	50129					4483.9		28870	7358.1	8553.3		51737		14323
55	54	P29511|TBA6_ARATH	R.AVFVDLEPTVIDEVR.T	N	83.6	1700.9	15	0.4	851.454	2	21.98																	19958						34634		0		15473					66456				20555		19383
55	54	P29511|TBA6_ARATH	K.EDAANNFAR.G	N	82.47	1006.45	9	2.2	504.229	2	12.18					86605	13852	39682					289840				6239.6		9891.2					3420.7
55	54	P29511|TBA6_ARATH	R.LSVDYGKK.S	N	66.83	908.497	8	-0.6	455.253	2	11.97					119230	120020	59593	8609.7	31030			355050		17675	2996.2
55	54	P29511|TBA6_ARATH	R.IHFMLSSYAPVISAEK.A	N	65.1	1791.92	16	-8.9	896.961	2	20.12					23233
55	54	P29511|TBA6_ARATH	R.AFVHWYVGEGMEEGEFSEAR.E	N	64.86	2329.01	20	1.8	777.346	3	19.27																													8777.2
55	54	P29511|TBA6_ARATH	R.QLFHPEQLISGKEDAANNFAR.G	N	55.13	2384.19	21	0.7	795.733	3	17.57					55201
55	54	P29511|TBA6_ARATH	R.IDHKFDLMYAK.R	N	53.84	1379.69	11	1.5	460.903	3	15.71												80043
55	54	P29511|TBA6_ARATH	K.FDLMYAK.R	N	53.68	886.426	7	1.2	444.219	2	17.94												42452
55	56	Q0WV25|TBA4_ARATH	K.TVGGGDDAFNTFFSETGAGK.H	N	104.98	1976.88	20	1.4	989.441	2	20.76	32416				108840							102870	2440		51923	7806.7	16296	13483	12256	6496.2		16109	84146	10372	50129					4483.9		28870	7358.1	8553.3		51737		14323
55	56	Q0WV25|TBA4_ARATH	R.AVFVDLEPTVIDEVR.T	N	83.6	1700.9	15	0.4	851.454	2	21.98																	19958						34634		0		15473					66456				20555		19383
55	56	Q0WV25|TBA4_ARATH	K.EDAANNFAR.G	N	82.47	1006.45	9	2.2	504.229	2	12.18					86605	13852	39682					289840				6239.6		9891.2					3420.7
55	56	Q0WV25|TBA4_ARATH	R.LSVDYGKK.S	N	66.83	908.497	8	-0.6	455.253	2	11.97					119230	120020	59593	8609.7	31030			355050		17675	2996.2
55	56	Q0WV25|TBA4_ARATH	R.IHFMLSSYAPVISAEK.A	N	65.1	1791.92	16	-8.9	896.961	2	20.12					23233
55	56	Q0WV25|TBA4_ARATH	R.AFVHWYVGEGMEEGEFSEAR.E	N	64.86	2329.01	20	1.8	777.346	3	19.27																													8777.2
55	56	Q0WV25|TBA4_ARATH	R.QLFHPEQLISGKEDAANNFAR.G	N	55.13	2384.19	21	0.7	795.733	3	17.57					55201
55	56	Q0WV25|TBA4_ARATH	R.IDHKFDLMYAK.R	N	53.84	1379.69	11	1.5	460.903	3	15.71												80043
55	56	Q0WV25|TBA4_ARATH	K.FDLMYAK.R	N	53.68	886.426	7	1.2	444.219	2	17.94												42452
55	57	B9DGT7|TBA2_ARATH	K.TVGGGDDAFNTFFSETGAGK.H	N	104.98	1976.88	20	1.4	989.441	2	20.76	32416				108840							102870	2440		51923	7806.7	16296	13483	12256	6496.2		16109	84146	10372	50129					4483.9		28870	7358.1	8553.3		51737		14323
55	57	B9DGT7|TBA2_ARATH	R.AVFVDLEPTVIDEVR.T	N	83.6	1700.9	15	0.4	851.454	2	21.98																	19958						34634		0		15473					66456				20555		19383
55	57	B9DGT7|TBA2_ARATH	K.EDAANNFAR.G	N	82.47	1006.45	9	2.2	504.229	2	12.18					86605	13852	39682					289840				6239.6		9891.2					3420.7
55	57	B9DGT7|TBA2_ARATH	R.LSVDYGKK.S	N	66.83	908.497	8	-0.6	455.253	2	11.97					119230	120020	59593	8609.7	31030			355050		17675	2996.2
55	57	B9DGT7|TBA2_ARATH	R.IHFMLSSYAPVISAEK.A	N	65.1	1791.92	16	-8.9	896.961	2	20.12					23233
55	57	B9DGT7|TBA2_ARATH	R.AFVHWYVGEGMEEGEFSEAR.E	N	64.86	2329.01	20	1.8	777.346	3	19.27																													8777.2
55	57	B9DGT7|TBA2_ARATH	R.QLFHPEQLISGKEDAANNFAR.G	N	55.13	2384.19	21	0.7	795.733	3	17.57					55201
55	57	B9DGT7|TBA2_ARATH	R.IDHKFDLMYAK.R	N	53.84	1379.69	11	1.5	460.903	3	15.71												80043
55	57	B9DGT7|TBA2_ARATH	K.FDLMYAK.R	N	53.68	886.426	7	1.2	444.219	2	17.94												42452
7	108	Q9FZE1|UGDH1_ARATH	K.AADLTYWESAAR.M	N	106.56	1352.64	12	-0.1	677.322	2	18.31	12909	24941	19187	27704	507780	42700	292620		12484		44322	573140	11820	14164	19306	38937	10922	26296			0	8853.5	38452		20275			24885		34388	89937	764.72	152350	18881		10985	158300
7	108	Q9FZE1|UGDH1_ARATH	K.LAANAFLAQR.I	N	104.34	1073.6	10	0.5	537.804	2	17.19	18896			55829	600350	0	433640			0		824390	39801		19189	0	8301.8	43941	5607.2		0	7276.7	35401		14635	44589		0		160220	119560		312000	53229		20906	185530	1180.3
7	108	Q9FZE1|UGDH1_ARATH	R.VVSSMFNTVSGK.K	Y	97.47	1254.63	12	1.1	628.319	2	16.59					264430		0					350740													5800.2					16815	21202		86725				62386
7	108	Q9FZE1|UGDH1_ARATH	R.LPIYEPGLEDVVK.Q	Y	77.98	1470.8	13	0.8	736.403	2	19.96					26502		7348.1																														3229.4
7	108	Q9FZE1|UGDH1_ARATH	R.VVSSMFNTVSGKK.I	Y	69.14	1382.72	13	2.5	461.914	3	14.89							6548
7	108	Q9FZE1|UGDH1_ARATH	K.NLFFSTDVEK.H	N	66.49	1198.59	10	-0.7	600.3	2	19.41																																	61477
7	108	Q9FZE1|UGDH1_ARATH	K.IFDNMQKPAFVFDGR.N	N	53.35	1783.87	15	1.2	595.632	3	19.52																																				0
34	86	P31167|ADT1_ARATH	R.TIKDEGFGSLWR.G	N	100.37	1407.71	12	0.1	704.861	2	18.45				312850						126850								205500			383970					269420
34	86	P31167|ADT1_ARATH	K.LLIQNQDEMIK.A	N	98.08	1343.71	11	-0.5	672.86	2	17.02				727310						677400								488740			660010					786180								12807
34	86	P31167|ADT1_ARATH	R.YFPTQALNFAFK.D	N	87.96	1445.73	12	0.2	723.871	2	22.45																					72785					75345
34	86	P31167|ADT1_ARATH	R.MMMTSGEAVK.Y	N	70.85	1083.48	10	1	542.743	2	13.54				165670						110140								74847			170600
34	86	P31167|ADT1_ARATH	R.GNTANVIR.Y	N	69.02	843.456	8	0.4	422.733	2	11.76				305580						205350								171500			262160
34	86	P31167|ADT1_ARATH	R.QFDGLVDVYR.K	Y	65.81	1210.6	10	0.9	606.304	2	18.58				0						0								0			0					0
34	86	P31167|ADT1_ARATH	K.DEGFGSLWR.G	N	65.09	1065.49	9	1.2	533.752	2	20.36																										4919.6
34	86	P31167|ADT1_ARATH	K.TAAAPIER.V	N	59.33	827.45	8	-0.2	414.73	2	11.73				504090						390680								346100			385750													16598
34	86	P31167|ADT1_ARATH	R.QFDGLVDVYRK.T	Y	56.23	1338.69	11	2.5	447.237	3	16.69				196370						122340								65425			209440					165370
44	138	P29546|EF1B_WHEAT	K.TYISGDGITKDDVK.V	Y	114.5	1510.75	14	0.3	756.38	2	13.58				394320						527480								366530			746630					2789.7								10859
44	138	P29546|EF1B_WHEAT	M.AVTFSDLHTADGLK.A	Y	95.13	1473.75	14	-0.6	737.877	2	16.43				189400						215060								138080								368310
44	138	P29546|EF1B_WHEAT	R.SVQMEGLTWGASK.L	Y	90.06	1392.67	13	-0.5	697.338	2	18.19				170580						191130								127990			473130					206110
44	138	P29546|EF1B_WHEAT	K.ALEAHLAGK.T	Y	88.21	908.508	9	-0.2	455.259	2	12.06				472950						555630								389060			740710
44	138	P29546|EF1B_WHEAT	K.LMPVGYGIK.K	Y	76	976.542	9	0.3	489.276	2	17.25				377220						446110								352170			641960					451080
44	138	P29546|EF1B_WHEAT	K.TYISGDGITK.D	Y	74.77	1053.53	10	1.9	527.773	2	13.88				73256						97026											103760
44	138	P29546|EF1B_WHEAT	K.SSVLMDIKPWDDETDMK.K	Y	71.71	2008.91	17	1.7	1005.47	2	19.9				12821																	4171.6					28129
44	138	P29546|EF1B_WHEAT	K.LMPVGYGIKK.L	Y	55.11	1104.64	10	-0.2	553.325	2	14.94																										67216
46	149	Q8LRM8|TCTP_WHEAT	K.EGAADPTFLYFAHGLK.E	Y	115.94	1735.86	16	1	579.624	3	20.75									5630.2		34873
46	149	Q8LRM8|TCTP_WHEAT	K.VVDIVDTFR.L	Y	95.47	1062.57	9	-0.8	532.29	2	19.32		261830	169520						214840		426700			135010
46	149	Q8LRM8|TCTP_WHEAT	K.LSGDELLSDSFPYR.E	Y	89.8	1597.76	14	-1	799.884	2	20.32		33731	27502						27036		118920		7389.5	24992
46	149	Q8LRM8|TCTP_WHEAT	R.LQEQPAFDKK.Q	Y	85.46	1202.63	10	1	401.882	3	11.95		449060	140520						262320		122340			67334
46	149	Q8LRM8|TCTP_WHEAT	K.LEGDDLDVFKK.N	Y	74.28	1277.65	11	0.8	639.83	2	16.65		185560									212860			96019
46	149	Q8LRM8|TCTP_WHEAT	MLVYQDK.L	Y	73.86	895.447	7	0.3	448.729	2	13.92		163740	95554						95677		209040			76589
46	149	Q8LRM8|TCTP_WHEAT	R.LQEQPAFDK.K	Y	67	1074.53	9	2	538.273	2	13.4		52112									0
46	149	Q8LRM8|TCTP_WHEAT	K.QFISHMK.R	Y	55.58	889.448	7	1.2	445.73	2	12.01		111120	43820
77	14	Q9SZN1|VATB2_ARATH	K.YTTVQFTGEVLK.T	Y	82.78	1384.72	12	0.6	693.367	2	18.24															12150								22642
77	14	Q9SZN1|VATB2_ARATH	K.AVVQVFEGTSGIDNK.Y	N	82.36	1562.79	15	-0.3	782.401	2	17.53	30781		22838											12880	22344								40714													10673
77	14	Q9SZN1|VATB2_ARATH	R.GYPGYMYTDLATIYER.A	N	77.39	1911.87	16	1.1	956.94	2	21.48																							31030				2746.7									12866
77	14	Q9SZN1|VATB2_ARATH	K.TPVSLDMLGR.I	N	75.43	1087.57	10	-0.1	544.792	2	18.95	25573		9840.7												15533																					12745
77	14	Q9SZN1|VATB2_ARATH	K.FVAQGAYDTR.N	Y	75.11	1126.54	10	-0.2	564.275	2	13.29	5667.1									0								0
77	14	Q9SZN1|VATB2_ARATH	R.QIYPPINVLPSLSR.L	N	71.49	1595.9	14	-0.1	798.959	2	22.28	52731																						72547				14789									40525
77	14	Q9SZN1|VATB2_ARATH	R.VTLFLNLANDPTIER.I	N	65.78	1714.93	15	-0.6	858.466	2	22.15																							6038.8
77	14	Q9SZN1|VATB2_ARATH	K.YQEIVNIR.L	N	63.55	1033.56	8	0.7	517.784	2	15.74	16896	0													14367								24361													4327.2
77	14	Q9SZN1|VATB2_ARATH	R.DHSDVSNQLYANYAIGK.D	N	57.41	1893.89	17	1.5	632.301	3	16.58															0								2756.9
77	14	Q9SZN1|VATB2_ARATH	R.TYPEEMIQTGISTIDVMNSIAR.G	N	56.27	2468.19	22	0.6	1235.1	2	24.79															4224.3
77	14	Q9SZN1|VATB2_ARATH	R.RGQVLEVDGEK.A	N	53.36	1228.64	11	1.5	615.326	2	12.36			15735
13	157	P41916|RAN1_ARATH	K.NLQYYEISAK.S	Y	90.89	1227.61	10	0.9	614.812	2	16.19			60156	217070				333500	78794	228110			127370					212000			414420					295130			47618					311520
13	157	P41916|RAN1_ARATH	K.LVIVGDGGTGK.T	Y	86.57	1014.57	11	0.4	508.29	2	14.89		61559	65222	479660				651640	77323	477360	58757		285640	47693				437220			775940					658710								634200
13	157	P41916|RAN1_ARATH	K.NVPTWHR.D	Y	81.61	908.462	7	-0.6	455.236	2	12.75				0				329460		118380			108110	22177				106860			346800													141340
13	157	P41916|RAN1_ARATH	K.SNYNFEKPFLYLAR.K	Y	78.99	1760.89	14	-1.5	587.969	3	22.35																					38953
13	157	P41916|RAN1_ARATH	R.HLTGEFEK.K	Y	78.18	959.471	8	0.7	480.741	2	11.9		80803	75682	397230				321420	65328	267290			171030	45441				359480			642840													639350
13	157	P41916|RAN1_ARATH	K.KNLQYYEISAK.S	Y	69.39	1355.71	11	1	678.859	2	14.13								34364																										25385
13	158	P41917|RAN2_ARATH	K.NLQYYEISAK.S	Y	90.89	1227.61	10	0.9	614.812	2	16.19			60156	217070				333500	78794	228110			127370					212000			414420					295130			47618					311520
13	158	P41917|RAN2_ARATH	K.LVIVGDGGTGK.T	Y	86.57	1014.57	11	0.4	508.29	2	14.89		61559	65222	479660				651640	77323	477360	58757		285640	47693				437220			775940					658710								634200
13	158	P41917|RAN2_ARATH	K.NVPTWHR.D	Y	81.61	908.462	7	-0.6	455.236	2	12.75				0				329460		118380			108110	22177				106860			346800													141340
13	158	P41917|RAN2_ARATH	K.SNYNFEKPFLYLAR.K	Y	78.99	1760.89	14	-1.5	587.969	3	22.35																					38953
13	158	P41917|RAN2_ARATH	R.HLTGEFEK.K	Y	78.18	959.471	8	0.7	480.741	2	11.9		80803	75682	397230				321420	65328	267290			171030	45441				359480			642840													639350
13	158	P41917|RAN2_ARATH	K.KNLQYYEISAK.S	Y	69.39	1355.71	11	1	678.859	2	14.13								34364																										25385
13	159	Q8H156|RAN3_ARATH	K.NLQYYEISAK.S	Y	90.89	1227.61	10	0.9	614.812	2	16.19			60156	217070				333500	78794	228110			127370					212000			414420					295130			47618					311520
13	159	Q8H156|RAN3_ARATH	K.LVIVGDGGTGK.T	Y	86.57	1014.57	11	0.4	508.29	2	14.89		61559	65222	479660				651640	77323	477360	58757		285640	47693				437220			775940					658710								634200
13	159	Q8H156|RAN3_ARATH	K.NVPTWHR.D	Y	81.61	908.462	7	-0.6	455.236	2	12.75				0				329460		118380			108110	22177				106860			346800													141340
13	159	Q8H156|RAN3_ARATH	K.SNYNFEKPFLYLAR.K	Y	78.99	1760.89	14	-1.5	587.969	3	22.35																					38953
13	159	Q8H156|RAN3_ARATH	R.HLTGEFEK.K	Y	78.18	959.471	8	0.7	480.741	2	11.9		80803	75682	397230				321420	65328	267290			171030	45441				359480			642840													639350
13	159	Q8H156|RAN3_ARATH	K.KNLQYYEISAK.S	Y	69.39	1355.71	11	1	678.859	2	14.13								34364																										25385
58	42	P83483|ATPBM_ARATH	R.FTQANSEVSALLGR.I	Y	102.61	1491.77	14	-0.4	746.888	2	19.13	56753														79839			0					83967													40325
58	42	P83483|ATPBM_ARATH	K.TVLIMELINNVAK.A	Y	84.61	1456.83	13	-0.9	729.423	2	25.61																							20183													48010
58	42	P83483|ATPBM_ARATH	R.IPSAVGYQPTLASDLGALQER.I	Y	83.3	2185.14	21	-1.1	1093.57	2	20.35															82526						2874.2		89073													57825
58	42	P83483|ATPBM_ARATH	R.QISELGIYPAVDPLDSTSR.M	Y	82.76	2060.04	19	1.3	1031.03	2	21.22	79756														147330								106160				22594									66803
58	42	P83483|ATPBM_ARATH	K.AHGGFSVFAGVGER.T	Y	82.35	1389.68	14	0.2	464.232	3	17.47	21895														19870								43021													9666.4
58	42	P83483|ATPBM_ARATH	K.VVDLLAPYQR.G	Y	75.23	1172.66	10	-2.1	587.335	2	19.48	206990																										13271
58	42	P83483|ATPBM_ARATH	R.TIAMDGTEGLVR.G	Y	74.91	1261.63	12	0.5	631.824	2	16.85	47283														29598								56600													15211
58	42	P83483|ATPBM_ARATH	R.TREGNDLYR.E	Y	54.05	1122.54	9	-0.4	562.276	2	11.28																							0
58	42	P83483|ATPBM_ARATH	R.EMIESGVIK.L	Y	50.83	1004.52	9	1	503.267	2	15.28																							26056
58	43	P83484|ATPBN_ARATH	R.FTQANSEVSALLGR.I	Y	102.61	1491.77	14	-0.4	746.888	2	19.13	56753														79839			0					83967													40325
58	43	P83484|ATPBN_ARATH	K.TVLIMELINNVAK.A	Y	84.61	1456.83	13	-0.9	729.423	2	25.61																							20183													48010
58	43	P83484|ATPBN_ARATH	R.IPSAVGYQPTLASDLGALQER.I	Y	83.3	2185.14	21	-1.1	1093.57	2	20.35															82526						2874.2		89073													57825
58	43	P83484|ATPBN_ARATH	R.QISELGIYPAVDPLDSTSR.M	Y	82.76	2060.04	19	1.3	1031.03	2	21.22	79756														147330								106160				22594									66803
58	43	P83484|ATPBN_ARATH	K.AHGGFSVFAGVGER.T	Y	82.35	1389.68	14	0.2	464.232	3	17.47	21895														19870								43021													9666.4
58	43	P83484|ATPBN_ARATH	K.VVDLLAPYQR.G	Y	75.23	1172.66	10	-2.1	587.335	2	19.48	206990																										13271
58	43	P83484|ATPBN_ARATH	R.TIAMDGTEGLVR.G	Y	74.91	1261.63	12	0.5	631.824	2	16.85	47283														29598								56600													15211
58	43	P83484|ATPBN_ARATH	R.TREGNDLYR.E	Y	54.05	1122.54	9	-0.4	562.276	2	11.28																							0
58	43	P83484|ATPBN_ARATH	R.EMIESGVIK.L	Y	50.83	1004.52	9	1	503.267	2	15.28																							26056
58	47	Q9C5A9|ATPBO_ARATH	R.FTQANSEVSALLGR.I	Y	102.61	1491.77	14	-0.4	746.888	2	19.13	56753														79839			0					83967													40325
58	47	Q9C5A9|ATPBO_ARATH	K.TVLIMELINNVAK.A	Y	84.61	1456.83	13	-0.9	729.423	2	25.61																							20183													48010
58	47	Q9C5A9|ATPBO_ARATH	R.IPSAVGYQPTLASDLGALQER.I	Y	83.3	2185.14	21	-1.1	1093.57	2	20.35															82526						2874.2		89073													57825
58	47	Q9C5A9|ATPBO_ARATH	R.QISELGIYPAVDPLDSTSR.M	Y	82.76	2060.04	19	1.3	1031.03	2	21.22	79756														147330								106160				22594									66803
58	47	Q9C5A9|ATPBO_ARATH	K.AHGGFSVFAGVGER.T	Y	82.35	1389.68	14	0.2	464.232	3	17.47	21895														19870								43021													9666.4
58	47	Q9C5A9|ATPBO_ARATH	K.VVDLLAPYQR.G	Y	75.23	1172.66	10	-2.1	587.335	2	19.48	206990																										13271
58	47	Q9C5A9|ATPBO_ARATH	R.TIAMDGTEGLVR.G	Y	74.91	1261.63	12	0.5	631.824	2	16.85	47283														29598								56600													15211
58	47	Q9C5A9|ATPBO_ARATH	R.TREGNDLYR.E	Y	54.05	1122.54	9	-0.4	562.276	2	11.28																							0
58	47	Q9C5A9|ATPBO_ARATH	R.EMIESGVIK.L	Y	50.83	1004.52	9	1	503.267	2	15.28																							26056
8	69	Q9LIA8|UGDH2_ARATH	K.AADLTYWESAAR.M	N	106.56	1352.64	12	-0.1	677.322	2	18.31	12909	24941	19187	27704	507780	42700	292620		12484		44322	573140	11820	14164	19306	38937	10922	26296			0	8853.5	38452		20275			24885		34388	89937	764.72	152350	18881		10985	158300
8	69	Q9LIA8|UGDH2_ARATH	K.LAANAFLAQR.I	N	104.34	1073.6	10	0.5	537.804	2	17.19	18896			55829	600350	0	433640			0		824390	39801		19189	0	8301.8	43941	5607.2		0	7276.7	35401		14635	44589		0		160220	119560		312000	53229		20906	185530	1180.3
8	69	Q9LIA8|UGDH2_ARATH	R.LSIYDPQVTEDQIQR.D	Y	76.43	1803.9	15	1.4	902.954	2	17.84					64711		26747					67255																			7420.9		15844				11177
8	69	Q9LIA8|UGDH2_ARATH	K.NLFFSTDVEK.H	N	66.49	1198.59	10	-0.7	600.3	2	19.41																																	61477
8	69	Q9LIA8|UGDH2_ARATH	K.IAVLGFAFK.K	Y	59.78	964.574	9	1.5	483.295	2	22.48																									61988												10282
8	69	Q9LIA8|UGDH2_ARATH	K.IFDNMQKPAFVFDGR.N	N	53.35	1783.87	15	1.2	595.632	3	19.52																																				0
8	69	Q9LIA8|UGDH2_ARATH	K.KIAVLGFAFK.K	Y	50.47	1092.67	10	-0.6	547.339	2	20.02					0
52	49	Q39043|BIP2_ARATH	R.IINEPTAAAIAYGLDKK.G	N	94.07	1786.98	17	-4.3	894.495	2	18.46				0					0	0			5751.3							131170	0			126000											10424			79981
52	49	Q39043|BIP2_ARATH	R.IINEPTAAAIAYGLDK.K	N	89.61	1658.89	16	-1	830.45	2	19.95			2956.3	6291	6041.5		10600				6927.4							6936.8		46942				32037	10915	9788.9				4926.5			4180.6		24074			52572
52	49	Q39043|BIP2_ARATH	K.DAGVIAGLNVAR.I	Y	84.09	1154.64	12	-1.2	578.327	2	18.25							70121			11988								6562.2						19123		20111				4581.2			30043		10444			10317
52	49	Q39043|BIP2_ARATH	K.EAEEFAEEDKK.V	Y	79.72	1323.58	11	1.4	662.797	2	11.5				25795				15450												3308.8	25445													16363
52	49	Q39043|BIP2_ARATH	K.NQAAVNPER.T	Y	73.22	997.494	9	-5.5	499.753	2	10.91							55217													2144.3
52	49	Q39043|BIP2_ARATH	R.ARFEELNNDLFR.K	Y	68.83	1522.75	12	0.9	508.592	3	18																								25721											4895.5			12647
52	49	Q39043|BIP2_ARATH	R.LSQEEIDR.M	Y	67.85	988.482	8	1	495.247	2	12.07				48386				33641		30886			6082.8								17346			4665.9										0
52	49	Q39043|BIP2_ARATH	K.NGHVEIIANDQGNR.I	Y	67.53	1535.74	14	1.3	512.92	3	12.45							39115
52	49	Q39043|BIP2_ARATH	K.FDLTGVPPAPR.G	Y	56.22	1168.62	11	0.9	585.32	2	19.23																																						38875
52	49	Q39043|BIP2_ARATH	R.FEELNNDLFR.K	Y	55.87	1295.61	10	2.2	648.816	2	18.69																																						24217
52	49	Q39043|BIP2_ARATH	K.EAEEFAEEDKKVK.E	Y	54.13	1550.75	13	-7.8	776.37	2	11.44				12554				0
78	19	Q8W4E2|VATB3_ARATH	K.AVVQVFEGTSGIDNK.F	N	82.36	1562.79	15	-0.3	782.401	2	17.53	30781		22838											12880	22344								40714													10673
78	19	Q8W4E2|VATB3_ARATH	R.TVSGVAGPLVILDK.V	Y	81.19	1367.8	14	-0.7	684.905	2	21.17	79566																						159580				24561									79091
78	19	Q8W4E2|VATB3_ARATH	R.GYPGYMYTDLATIYER.A	N	77.39	1911.87	16	1.1	956.94	2	21.48																							31030				2746.7									12866
78	19	Q8W4E2|VATB3_ARATH	K.TPVSLDMLGR.I	N	75.43	1087.57	10	-0.1	544.792	2	18.95	25573		9840.7												15533																					12745
78	19	Q8W4E2|VATB3_ARATH	R.QIYPPINVLPSLSR.L	N	71.49	1595.9	14	-0.1	798.959	2	22.28	52731																						72547				14789									40525
78	19	Q8W4E2|VATB3_ARATH	R.VTLFLNLANDPTIER.I	N	65.78	1714.93	15	-0.6	858.466	2	22.15																							6038.8
78	19	Q8W4E2|VATB3_ARATH	K.YQEIVNIR.L	N	63.55	1033.56	8	0.7	517.784	2	15.74	16896	0													14367								24361													4327.2
78	19	Q8W4E2|VATB3_ARATH	K.DHSDVSNQLYANYAIGK.D	N	57.41	1893.89	17	1.5	632.301	3	16.58															0								2756.9
78	19	Q8W4E2|VATB3_ARATH	R.TYPEEMIQTGISTIDVMNSIAR.G	N	56.27	2468.19	22	0.6	1235.1	2	24.79															4224.3
78	19	Q8W4E2|VATB3_ARATH	R.RGQVLEVDGEK.A	N	53.36	1228.64	11	1.5	615.326	2	12.36			15735
78	22	P11574|VATB1_ARATH	K.AVVQVFEGTSGIDNK.F	N	82.36	1562.79	15	-0.3	782.401	2	17.53	30781		22838											12880	22344								40714													10673
78	22	P11574|VATB1_ARATH	R.TVSGVAGPLVILDK.V	Y	81.19	1367.8	14	-0.7	684.905	2	21.17	79566																						159580				24561									79091
78	22	P11574|VATB1_ARATH	R.GYPGYMYTDLATIYER.A	N	77.39	1911.87	16	1.1	956.94	2	21.48																							31030				2746.7									12866
78	22	P11574|VATB1_ARATH	K.TPVSLDMLGR.I	N	75.43	1087.57	10	-0.1	544.792	2	18.95	25573		9840.7												15533																					12745
78	22	P11574|VATB1_ARATH	R.QIYPPINVLPSLSR.L	N	71.49	1595.9	14	-0.1	798.959	2	22.28	52731																						72547				14789									40525
78	22	P11574|VATB1_ARATH	R.VTLFLNLANDPTIER.I	N	65.78	1714.93	15	-0.6	858.466	2	22.15																							6038.8
78	22	P11574|VATB1_ARATH	K.YQEIVNIR.L	N	63.55	1033.56	8	0.7	517.784	2	15.74	16896	0													14367								24361													4327.2
78	22	P11574|VATB1_ARATH	K.DHSDVSNQLYANYAIGK.D	N	57.41	1893.89	17	1.5	632.301	3	16.58															0								2756.9
78	22	P11574|VATB1_ARATH	R.TYPEEMIQTGISTIDVMNSIAR.G	N	56.27	2468.19	22	0.6	1235.1	2	24.79															4224.3
78	22	P11574|VATB1_ARATH	R.RGQVLEVDGEK.A	N	53.36	1228.64	11	1.5	615.326	2	12.36			15735
135	46	Q9LKJ3|PHSH_WHEAT	K.FGYELEAIAGQER.D	Y	94.09	1481.71	13	-0.7	741.864	2	19.23																																						0
135	46	Q9LKJ3|PHSH_WHEAT	K.TDQWTSNLDLLTGLR.K	Y	92.01	1731.88	15	2	866.949	2	21.83																																						133690
135	46	Q9LKJ3|PHSH_WHEAT	R.ALTNAVGNLAITGAYADALKK.F	Y	88.17	2074.14	21	-1.8	692.387	3	19.84																								0														45067
135	46	Q9LKJ3|PHSH_WHEAT	R.ALTNAVGNLAITGAYADALK.K	Y	73.03	1946.05	20	-0.8	974.03	2	21.35																																						1590.8
135	46	Q9LKJ3|PHSH_WHEAT	R.GDYFLVGYDFPSYIDAQAR.V	Y	71.83	2196.02	19	-1.4	1099.01	2	23.54																								4385.3														33516
135	46	Q9LKJ3|PHSH_WHEAT	K.MSILNTAGSGK.F	Y	61.83	1077.55	11	-5	539.779	2	15.38																								2581.4
135	46	Q9LKJ3|PHSH_WHEAT	R.HDVVYPIR.F	Y	61.69	997.534	8	-2.3	499.773	2	13.99																								4077
135	46	Q9LKJ3|PHSH_WHEAT	R.EEVGQDNFFLFGAK.A	Y	59.54	1599.76	14	0.5	800.886	2	22.04
135	46	Q9LKJ3|PHSH_WHEAT	R.FFGHVEISPDGK.R	Y	52.88	1331.65	12	-4.8	666.83	2	16.26																								7339.7
16	137	Q96300|14337_ARATH	R.YEEMVEFMEK.V	N	95.96	1333.56	10	0	667.783	2	18.7				129360						141850								121780			200310					113880
16	137	Q96300|14337_ARATH	R.IISSIEQKEESR.G	N	94.22	1417.74	12	-1.4	709.873	2	12.24			7350.5	2144000		5137.8		93432	7133.9	1936200			93664			5591		1084300			2476900	4540.1												188170
16	137	Q96300|14337_ARATH	K.DSTLIMQLLR.D	N	78.02	1188.65	10	-1.3	595.333	2	24.18				15451																	74485					42215												2871.6
16	137	Q96300|14337_ARATH	K.TVDTDELTVEER.N	Y	76.22	1405.66	12	-0.7	703.835	2	14.47				871710				155290		509600			118810					808590			1199000					424330								205180
16	137	Q96300|14337_ARATH	R.GKIETELSK.I	Y	72.33	1003.55	9	0.8	502.783	2	11.7				224960						216810								163270			219430													23973
16	137	Q96300|14337_ARATH	R.NLLSVAYK.N	N	66.08	906.518	8	-0.9	454.264	2	17.31				0				59635		570880			45160					456370			507470					1219500			20910					69795
16	137	Q96300|14337_ARATH	R.IISSIEQK.E	N	59.45	916.523	8	0.1	459.267	2	12.98				235080						356600								293710			433680
16	137	Q96300|14337_ARATH	K.LAEQAER.Y	N	59.21	815.414	7	0.6	408.713	2	10.7																																		0
16	137	Q96300|14337_ARATH	K.IETELSK.I	Y	50.23	818.438	7	1	410.225	2	12.27																					121510
37	140	Q8VYK6|RS43_ARATH	K.FDVGNVVMVTGGR.N	Y	122.37	1349.68	13	-0.4	675.842	2	19.61				190560						138050			0					143890			395900					279960
37	140	Q8VYK6|RS43_ARATH	K.GIPYLNTYDGR.T	Y	114.33	1267.62	11	-0.6	634.813	2	18.13			15972	1065100					0	1111300			35299					891270			1242500					1194400		32796	15042					41312
37	140	Q8VYK6|RS43_ARATH	K.LGGAFAPKPSSGPHK.S	Y	88.94	1449.77	15	1.2	484.263	3	12.06				575250						401110								322320			934250
37	140	Q8VYK6|RS43_ARATH	K.GTKPWVSLPK.G	Y	81.68	1111.64	10	0.1	556.824	2	16.05				808060						643220			17040					599240			1127000					975300
37	140	Q8VYK6|RS43_ARATH	R.LKYALTYR.E	Y	52.69	1026.59	8	2.9	514.299	2	14.52				95913
37	169	P49204|RS42_ARATH	K.FDVGNVVMVTGGR.N	Y	122.37	1349.68	13	-0.4	675.842	2	19.61				190560						138050			0					143890			395900					279960
37	169	P49204|RS42_ARATH	K.GIPYLNTYDGR.T	Y	114.33	1267.62	11	-0.6	634.813	2	18.13			15972	1065100					0	1111300			35299					891270			1242500					1194400		32796	15042					41312
37	169	P49204|RS42_ARATH	K.LGGAFAPKPSSGPHK.S	Y	88.94	1449.77	15	1.2	484.263	3	12.06				575250						401110								322320			934250
37	169	P49204|RS42_ARATH	K.GTKPWVSLPK.G	Y	81.68	1111.64	10	0.1	556.824	2	16.05				808060						643220			17040					599240			1127000					975300
37	169	P49204|RS42_ARATH	R.LKYALTYR.E	Y	52.69	1026.59	8	2.9	514.299	2	14.52				95913
37	171	Q93VH9|RS41_ARATH	K.FDVGNVVMVTGGR.N	Y	122.37	1349.68	13	-0.4	675.842	2	19.61				190560						138050			0					143890			395900					279960
37	171	Q93VH9|RS41_ARATH	K.GIPYLNTYDGR.T	Y	114.33	1267.62	11	-0.6	634.813	2	18.13			15972	1065100					0	1111300			35299					891270			1242500					1194400		32796	15042					41312
37	171	Q93VH9|RS41_ARATH	K.LGGAFAPKPSSGPHK.S	Y	88.94	1449.77	15	1.2	484.263	3	12.06				575250						401110								322320			934250
37	171	Q93VH9|RS41_ARATH	K.GTKPWVSLPK.G	Y	81.68	1111.64	10	0.1	556.824	2	16.05				808060						643220			17040					599240			1127000					975300
37	171	Q93VH9|RS41_ARATH	R.LKYALTYR.E	Y	52.69	1026.59	8	2.9	514.299	2	14.52				95913
51	58	Q9ASR1|EF2_ARATH	K.FSVSPVVR.V	Y	98.18	889.502	8	-3.4	445.757	2	16.28												0			0		59493					38479	10860									5304.7	9191.1			4509.7	0
51	58	Q9ASR1|EF2_ARATH	R.VIYASQITAKPR.L	Y	86.9	1345.77	12	-4.9	673.89	2	14.3						9788				4388.1						13331	15315					10139
51	58	Q9ASR1|EF2_ARATH	R.RVIYASQITAKPR.L	Y	72.16	1501.87	13	-3	501.63	3	12.99																												3586.1
51	58	Q9ASR1|EF2_ARATH	R.GGGQVIPTAR.R	Y	66.18	954.525	10	-4.2	478.268	2	13.11						0				39322							18954					13962						0
51	58	Q9ASR1|EF2_ARATH	R.IRPVLTVNK.M	Y	54.94	1038.65	9	-5.3	520.332	2	13.8																	26883
51	58	Q9ASR1|EF2_ARATH	K.DSVVAGFQWASK.E	Y	54.82	1293.64	12	-9.6	647.823	2	19.41																			0
73	182	Q9FF90|RL133_ARATH	K.LAPTIGISVDHR.R	Y	101.48	1277.71	12	0.7	639.859	2	16.1				185270						81606								106420			239750					247930
73	182	Q9FF90|RL133_ARATH	K.HWQNYVK.T	N	88.38	973.477	7	0.3	487.743	2	12.64				384310						235610								229000			480360
73	182	Q9FF90|RL133_ARATH	K.KLAPTIGISVDHR.R	Y	88.26	1405.8	13	0.7	469.606	3	14.78				95383														39083			432860					290030
73	182	Q9FF90|RL133_ARATH	K.TWFNQPAR.K	N	78.19	1018.5	8	-0.1	510.256	2	16.35				605710						613780								445930			766080					635630
73	182	Q9FF90|RL133_ARATH	K.GFTLEELK.V	N	74.34	935.496	8	-0.5	468.753	2	18.45				297450						319730								256190			215860					553010
73	182	Q9FF90|RL133_ARATH	K.LAPTIGISVDHRR.K	Y	73.33	1433.81	13	0.1	478.944	3	14.68				31080														11685								58401
73	182	Q9FF90|RL133_ARATH	R.KHWQNYVK.T	N	64.29	1101.57	8	1.1	551.791	2	11.38				59700																	77880
73	182	Q9FF90|RL133_ARATH	K.TWFNQPARK.T	N	59.64	1146.59	9	1.9	574.302	2	14.1										204720											294770
10	93	Q9FM01|UGDH4_ARATH	K.AADLTYWESAAR.M	N	106.56	1352.64	12	-0.1	677.322	2	18.31	12909	24941	19187	27704	507780	42700	292620		12484		44322	573140	11820	14164	19306	38937	10922	26296			0	8853.5	38452		20275			24885		34388	89937	764.72	152350	18881		10985	158300
10	93	Q9FM01|UGDH4_ARATH	K.LAANAFLAQR.I	N	104.34	1073.6	10	0.5	537.804	2	17.19	18896			55829	600350	0	433640			0		824390	39801		19189	0	8301.8	43941	5607.2		0	7276.7	35401		14635	44589		0		160220	119560		312000	53229		20906	185530	1180.3
10	93	Q9FM01|UGDH4_ARATH	K.NLFFSTDVEK.H	N	66.49	1198.59	10	-0.7	600.3	2	19.41																																	61477
10	93	Q9FM01|UGDH4_ARATH	K.QVSVTWDAYEATK.D	Y	50.22	1496.71	13	-1	749.364	2	18.01
53	98	Q9S9N1|HSP7E_ARATH	R.IINEPTAAAIAYGLDKK.G	N	94.07	1786.98	17	-4.3	894.495	2	18.46				0					0	0			5751.3							131170	0			126000											10424			79981
53	98	Q9S9N1|HSP7E_ARATH	K.NAVVTVPAYFNDSQR.Q	N	91.72	1679.83	15	-0.4	840.917	2	18.51		22514		59757				29920	45504	36201	0		28102					66695		56419	90775					82025								57035	10464			40620
53	98	Q9S9N1|HSP7E_ARATH	R.IINEPTAAAIAYGLDK.K	N	89.61	1658.89	16	-1	830.45	2	19.95			2956.3	6291	6041.5		10600				6927.4							6936.8		46942				32037	10915	9788.9				4926.5			4180.6		24074			52572
53	98	Q9S9N1|HSP7E_ARATH	K.ATAGDTHLGGEDFDNR.L	N	82.27	1674.72	16	2.8	559.247	3	13.12			7506.2	59235	20180			80311	15834	35108	4798.8	30356	53774	16416		7092.4		54523		16759	41588			7411.4										61369
53	98	Q9S9N1|HSP7E_ARATH	R.TTPSYVAFTDTER.L	Y	76.32	1486.69	13	-5.2	744.35	2	16.94																				18554				14374											2884.6
53	98	Q9S9N1|HSP7E_ARATH	R.FEEMNMDLFR.K	N	68.1	1330.57	10	-6.4	666.289	2	20.93																				4370
53	98	Q9S9N1|HSP7E_ARATH	K.NSLENYAYNMR.N	Y	62.88	1373.6	11	2.5	687.807	2	16.4				36281
53	98	Q9S9N1|HSP7E_ARATH	R.LSKEEIEK.M	N	61.8	974.528	8	1.2	488.27	2	11.01				24703
100	68	Q9SIB9|ACO3M_ARATH	K.FYSLPALNDPR.V	Y	110.41	1291.66	11	1.5	646.836	2	19.58																	63028		0			43052										6897.3
100	68	Q9SIB9|ACO3M_ARATH	R.NGVTATDLVLTVTQMLR.K	N	75.06	1830.99	17	1.8	916.503	2	27.51																																0
100	68	Q9SIB9|ACO3M_ARATH	K.TSLAPGSGVVTK.Y	N	66.02	1115.62	12	-0.4	558.816	2	14																			7276.1			10288
100	68	Q9SIB9|ACO3M_ARATH	K.QVEIPFKPAR.V	N	61.04	1183.67	10	-1.9	592.842	2	16.15
100	68	Q9SIB9|ACO3M_ARATH	K.INPLVPVDLVIDHSVQVDVAR.S	N	52.67	2297.27	21	-0.1	766.765	3	23.67																																0
22	148	P46077|14334_ARATH	R.YEEMVEFMEK.V	N	95.96	1333.56	10	0	667.783	2	18.7				129360						141850								121780			200310					113880
22	148	P46077|14334_ARATH	R.IISSIEQKEESR.G	N	94.22	1417.74	12	-1.4	709.873	2	12.24			7350.5	2144000		5137.8		93432	7133.9	1936200			93664			5591		1084300			2476900	4540.1												188170
22	148	P46077|14334_ARATH	K.DSTLIMQLLR.D	N	78.02	1188.65	10	-1.3	595.333	2	24.18				15451																	74485					42215												2871.6
22	148	P46077|14334_ARATH	R.NLLSVAYK.N	N	66.08	906.518	8	-0.9	454.264	2	17.31				0				59635		570880			45160					456370			507470					1219500			20910					69795
22	148	P46077|14334_ARATH	R.IISSIEQK.E	N	59.45	916.523	8	0.1	459.267	2	12.98				235080						356600								293710			433680
22	148	P46077|14334_ARATH	K.LAEQAER.Y	N	59.21	815.414	7	0.6	408.713	2	10.7																																		0
80	91	P23686|METK1_ARATH	R.FVIGGPHGDAGLTGR.K	N	112.8	1452.75	15	-1.4	727.38	2	16.05				99756		36075	289120																					60868		15836	45384		177620	53651
80	91	P23686|METK1_ARATH	K.TIFHLNPSGR.F	N	84.93	1140.6	10	0.3	571.309	2	15.75					51101		72303									27309		47568			51853					31892				4508.4	11783		43089	21494
80	91	P23686|METK1_ARATH	K.TAAYGHFGR.D	N	79.54	978.467	9	1.1	490.239	2	12.17							166670					25446									22518
80	91	P23686|METK1_ARATH	K.VLVNIEQQSPDIAQGVHGHFTK.C	Y	55.25	2416.25	22	-0.9	806.419	3	16.61					40299
80	91	P23686|METK1_ARATH	K.EHVIKPVIPEK.Y	N	54.4	1287.76	11	2.1	644.886	2	13.26							11176
70	161	Q8VZB9|R10A1_ARATH	K.AGKFPTLVSHQESLESK.V	N	119.62	1856.96	17	0.6	619.992	3	14.5								178900					56929																					193060
70	161	Q8VZB9|R10A1_ARATH	K.FPTLVSHQESLESK.V	N	107.21	1600.81	14	-1.8	801.411	2	15.96								542460					343210																32056					485320
70	161	Q8VZB9|R10A1_ARATH	K.LPHIPRPK.M	N	78.6	956.592	8	0.5	479.302	2	12.87								63467					12802																					205130
70	161	Q8VZB9|R10A1_ARATH	R.LLGPGLNK.A	N	61.3	810.496	8	-1.5	406.253	2	14.89		81590	98425					1320000		46455	59523		1095400					76390			68485													930370
70	161	Q8VZB9|R10A1_ARATH	K.KNWQNVR.C	N	51.73	943.499	7	0.3	472.754	2	11.19								164590
96	115	Q1W374|PMM_WHEAT	R.SGMINVSPIGR.N	Y	93.13	1129.59	11	1.2	565.802	2	17.1								73029					46690								20661													87721
96	115	Q1W374|PMM_WHEAT	K.GGNDHEIFESDR.T	Y	80.05	1374.58	12	-0.9	459.2	3	12.99								65663																										30468
96	115	Q1W374|PMM_WHEAT	K.TYKGGNDHEIFESDR.T	Y	77.97	1766.79	15	1.8	589.935	3	12.42																																		17833
96	115	Q1W374|PMM_WHEAT	R.ENVTVGVVGGSDLVK.I	Y	58.03	1471.79	15	-1.7	736.898	2	17.39																																		0
49	116	Q9FWA3|6PGD2_ARATH	R.DYFGAHTYER.T	Y	98.83	1257.54	10	0.2	629.775	2	14.15					435720							571930													3742.5
49	116	Q9FWA3|6PGD2_ARATH	R.LPANLVQAQR.D	N	93.81	1108.64	10	1.4	555.323	2	15.17					84953							177790													1650.9								13329
49	116	Q9FWA3|6PGD2_ARATH	K.GFPISVYNR.T	N	88.01	1051.55	9	0.7	526.778	2	18.01					368780							569870											10482		26451					1777.3			54265				113000
49	116	Q9FWA3|6PGD2_ARATH	R.ERLPANLVQAQR.D	Y	87.74	1393.78	12	2.5	465.6	3	14.51					50008							91630																					2733.7
49	116	Q9FWA3|6PGD2_ARATH	R.FLSGLKDER.V	Y	77.28	1063.57	9	-0.6	532.787	2	13.75					403960							571010
49	116	Q9FWA3|6PGD2_ARATH	R.IGLAGLAVMGQNLALNIAEK.G	N	73.48	1995.12	20	-0.2	998.566	2	25.59					3522.8																				24592
84	74	Q56WH1|TBA3_ARATH	R.AVFVDLEPTVIDEVR.T	N	83.6	1700.9	15	0.4	851.454	2	21.98																	19958						34634		0		15473					66456				20555		19383
84	74	Q56WH1|TBA3_ARATH	K.EDAANNFAR.G	N	82.47	1006.45	9	2.2	504.229	2	12.18					86605	13852	39682					289840				6239.6		9891.2					3420.7
84	74	Q56WH1|TBA3_ARATH	R.SLDIERPTYTNLNR.L	N	76.39	1690.86	14	1.8	564.627	3	15.71					200280							516510																									22953
84	74	Q56WH1|TBA3_ARATH	R.LSVDYGKK.S	N	66.83	908.497	8	-0.6	455.253	2	11.97					119230	120020	59593	8609.7	31030			355050		17675	2996.2
84	74	Q56WH1|TBA3_ARATH	R.AFVHWYVGEGMEEGEFSEAR.E	N	64.86	2329.01	20	1.8	777.346	3	19.27																													8777.2
84	74	Q56WH1|TBA3_ARATH	R.QLFHPEQLISGKEDAANNFAR.G	N	55.13	2384.19	21	0.7	795.733	3	17.57					55201
84	74	Q56WH1|TBA3_ARATH	R.IDHKFDLMYAK.R	N	53.84	1379.69	11	1.5	460.903	3	15.71												80043
84	74	Q56WH1|TBA3_ARATH	K.FDLMYAK.R	N	53.68	886.426	7	1.2	444.219	2	17.94												42452
84	75	B9DHQ0|TBA5_ARATH	R.AVFVDLEPTVIDEVR.T	N	83.6	1700.9	15	0.4	851.454	2	21.98																	19958						34634		0		15473					66456				20555		19383
84	75	B9DHQ0|TBA5_ARATH	K.EDAANNFAR.G	N	82.47	1006.45	9	2.2	504.229	2	12.18					86605	13852	39682					289840				6239.6		9891.2					3420.7
84	75	B9DHQ0|TBA5_ARATH	R.SLDIERPTYTNLNR.L	N	76.39	1690.86	14	1.8	564.627	3	15.71					200280							516510																									22953
84	75	B9DHQ0|TBA5_ARATH	R.LSVDYGKK.S	N	66.83	908.497	8	-0.6	455.253	2	11.97					119230	120020	59593	8609.7	31030			355050		17675	2996.2
84	75	B9DHQ0|TBA5_ARATH	R.AFVHWYVGEGMEEGEFSEAR.E	N	64.86	2329.01	20	1.8	777.346	3	19.27																													8777.2
84	75	B9DHQ0|TBA5_ARATH	R.QLFHPEQLISGKEDAANNFAR.G	N	55.13	2384.19	21	0.7	795.733	3	17.57					55201
84	75	B9DHQ0|TBA5_ARATH	R.IDHKFDLMYAK.R	N	53.84	1379.69	11	1.5	460.903	3	15.71												80043
84	75	B9DHQ0|TBA5_ARATH	K.FDLMYAK.R	N	53.68	886.426	7	1.2	444.219	2	17.94												42452
117	67	O24396|PURA_WHEAT	R.EAELANSFIGTTK.R	Y	101.81	1379.69	13	0.7	690.851	2	17.43					0		0					142410																					14117				36839
117	67	O24396|PURA_WHEAT	R.SYSELPQAAR.R	Y	82.64	1120.55	10	0.1	561.28	2	13.85					125180							191590
117	67	O24396|PURA_WHEAT	R.VGSGPFPTELLGEEGDVLR.K	Y	70.56	1970.99	19	-1.1	986.504	2	22.59					12017										2193.4										0
117	67	O24396|PURA_WHEAT	R.IEELAGVPVHYIGVGPGR.D	Y	58.84	1862.01	18	-0.5	932.005	2	18.94					0
117	67	O24396|PURA_WHEAT	K.LVDVLAPR.F	Y	57.54	881.533	8	-0.4	441.774	2	17.41												144330													4460.3						3627.9						28506
117	67	O24396|PURA_WHEAT	K.LDVLSGLPEIK.L	Y	55.79	1182.69	11	-0.1	592.35	2	21.53					7413.1																				26733
117	67	O24396|PURA_WHEAT	K.GMLKEEVER.Y	Y	50.97	1089.55	9	2.1	545.78	2	12.17												0
117	67	O24396|PURA_WHEAT	R.LEPFIADTVHVLNESIR.Q	Y	50.05	1952.04	17	-0.3	651.686	3	22.76																									4294.9
75	145	P59231|R10A3_ARATH	K.AGKFPTLVSHQESLESK.V	N	119.62	1856.96	17	0.6	619.992	3	14.5								178900					56929																					193060
75	145	P59231|R10A3_ARATH	K.FPTLVSHQESLESK.V	N	107.21	1600.81	14	-1.8	801.411	2	15.96								542460					343210																32056					485320
75	145	P59231|R10A3_ARATH	K.LPHVPRPK.M	Y	69.42	942.576	8	1.6	472.295	2	11.93								9739.6																										38319
75	145	P59231|R10A3_ARATH	R.LLGPGLNK.A	N	61.3	810.496	8	-1.5	406.253	2	14.89		81590	98425					1320000		46455	59523		1095400					76390			68485													930370
75	145	P59231|R10A3_ARATH	K.KNWQNVR.C	N	51.73	943.499	7	0.3	472.754	2	11.19								164590
83	129	Q9LUT2|METK4_ARATH	R.FVIGGPHGDAGLTGR.K	N	112.8	1452.75	15	-1.4	727.38	2	16.05				99756		36075	289120																					60868		15836	45384		177620	53651
83	129	Q9LUT2|METK4_ARATH	K.TIFHLNPSGR.F	N	84.93	1140.6	10	0.3	571.309	2	15.75					51101		72303									27309		47568			51853					31892				4508.4	11783		43089	21494
83	129	Q9LUT2|METK4_ARATH	K.TAAYGHFGR.D	N	79.54	978.467	9	1.1	490.239	2	12.17							166670					25446									22518
83	129	Q9LUT2|METK4_ARATH	R.DDADFTWEVVKPLK.S	Y	71.11	1661.83	14	0.3	831.919	2	19.96							21838
83	129	Q9LUT2|METK4_ARATH	K.EHVIKPVIPEK.Y	N	54.4	1287.76	11	2.1	644.886	2	13.26							11176
28	291	O48549|RS61_ARATH	K.KGENDLPGLTDTEKPR.M	Y	134	1768.9	16	1.8	590.638	3	13.61				413120				485130		630070	6024.6		164020					378380			971790	5229.8				5783.6								660330
28	291	O48549|RS61_ARATH	K.GENDLPGLTDTEKPR.M	Y	88.13	1640.8	15	1	547.941	3	14.89																										57323
28	291	O48549|RS61_ARATH	K.QGVLTPGR.V	Y	76.45	826.466	8	0.5	414.238	2	12.87				151910				188760		242710			90835					162000			335430													206050
28	291	O48549|RS61_ARATH	R.LVTPLTLQR.K	Y	72.65	1039.64	9	0.5	520.824	2	18.3				705790				581700		1193800			352420					650030			1150000					1344000			190130					846500
94	94	P46274|VDAC1_WHEAT	M.GGPGLYSGIGKK.A	Y	92.44	1132.62	12	0.8	567.317	2	13.36				54505				6764.7		41613								61822			60160
94	94	P46274|VDAC1_WHEAT	K.TILSFAVPDQK.S	Y	91.45	1217.67	11	0.1	609.84	2	19.84				100450						69621											162520					146450								62421
94	94	P46274|VDAC1_WHEAT	K.ANSASNVITTITADDLAAPGLK.T	Y	88.15	2142.12	22	0.2	1072.06	2	21.4				10021						8113.5								19108								16031
94	94	P46274|VDAC1_WHEAT	M.GGPGLYSGIGK.K	Y	70.85	1004.53	11	2.5	503.273	2	15.3																					85534					69929
94	94	P46274|VDAC1_WHEAT	K.AKDLLYR.D	Y	66.37	877.502	7	1.2	439.756	2	12.82				38083						30384								39987			48857
94	94	P46274|VDAC1_WHEAT	K.ASALIQHEFMPK.S	Y	60.38	1370.7	12	2.1	686.357	2	16.19																																		15086
111	76	Q940P8|TCPB_ARATH	K.SLHIDNPAAK.V	Y	90.15	1064.56	10	1.3	533.286	2	13.02								148250					117120																					117200
111	76	Q940P8|TCPB_ARATH	K.DSFLDEGFILDKK.I	Y	76.25	1525.77	13	-0.9	763.888	2	21.3								0					6745.2																							3068.5
111	76	Q940P8|TCPB_ARATH	K.VQDDEVGDGTTSVVVLAGELLR.E	Y	72.59	2271.16	22	-2.1	1136.58	2	26.57
111	76	Q940P8|TCPB_ARATH	R.LGLVTGGEIASTFDNPESVK.L	Y	51.14	2033.03	20	1.2	1017.52	2	20.68																					49660
67	66	P92549|ATPAM_ARATH	R.EAFPGDVFYLHSR.L	N	93.47	1536.74	13	0.8	769.373	2	19.48	113830														108910								131010													70096
67	66	P92549|ATPAM_ARATH	R.TGSIVDVPAGK.A	N	83.72	1042.57	11	-0.9	522.288	2	14.63	20477	48138	29893											34830	14285								24651
67	66	P92549|ATPAM_ARATH	R.GIRPAINVGLSVSR.V	N	72.89	1437.84	14	0.2	480.286	3	16.82
67	66	P92549|ATPAM_ARATH	K.AVDSLVPIGR.G	N	69.54	1025.59	10	0.5	513.799	2	17.84	65235	16308													41709			0					66053													22193
67	66	P92549|ATPAM_ARATH	R.DNGMHALIIYDDLSK.Q	N	68.43	1703.82	15	-0.7	852.913	2	20.05																							41045				1218.3
67	66	P92549|ATPAM_ARATH	K.LELAQYR.E	N	57.56	891.481	7	-2.1	446.745	2	15.26															12040								24062
67	66	P92549|ATPAM_ARATH	R.KMELDAFLK.E	Y	54.5	1093.58	9	0.9	547.798	2	18.41	32770
67	66	P92549|ATPAM_ARATH	R.QMSLLLR.R	N	50.85	859.495	7	-0.1	430.753	2	18.5																							43049
72	177	P59230|R10A2_ARATH	K.AGKFPTLVSHQESLEAK.V	Y	113.42	1840.97	17	2.2	614.662	3	14.69								148270					31073																					112360
72	177	P59230|R10A2_ARATH	K.FPTLVSHQESLEAK.V	Y	101.4	1584.81	14	1.7	529.277	3	16.06								207680					174310																11038					256970
72	177	P59230|R10A2_ARATH	K.LPHIPRPK.M	N	78.6	956.592	8	0.5	479.302	2	12.87								63467					12802																					205130
72	177	P59230|R10A2_ARATH	R.LLGPGLNK.A	N	61.3	810.496	8	-1.5	406.253	2	14.89		81590	98425					1320000		46455	59523		1095400					76390			68485													930370
72	177	P59230|R10A2_ARATH	K.KNWQNVR.C	N	51.73	943.499	7	0.3	472.754	2	11.19								164590
39	205	Q08682|RSSA1_ARATH	R.HTPGTFTNQMQTSFSEPR.L	Y	122.78	2064.93	18	0.6	689.316	3	15.62				27111				65890	11839		50153		0			10740		19380			30484					21368								94584
39	205	Q08682|RSSA1_ARATH	K.FAQYTGANAIAGR.H	Y	115.47	1338.67	13	-0.3	670.339	2	15.03		221260	262080	0		72737	23313	187080	167300	115330	235040		174170	152150		54262		123340								133540		51158						134130
39	205	Q08682|RSSA1_ARATH	R.LLILTDPR.T	Y	62.82	939.575	8	0.7	470.794	2	19.55			0								0		373670								0								69017					177250
39	205	Q08682|RSSA1_ARATH	R.VIVAIENPQDIIVQSARPYGQR.A	Y	58.13	2465.34	22	0.9	822.788	3	20.33																					4773.4					4405.6
103	232	Q8L5C6|XIP1_WHEAT	K.NVYYGVAPVAQK.K	Y	102.79	1307.69	12	1.4	654.849	2	15.76				80062				37096		22162								56250			80713													71751
103	232	Q8L5C6|XIP1_WHEAT	R.GGPGKPLHLTATVR.C	Y	99.66	1402.8	14	1	468.608	3	12.87																					73419													48705
103	232	Q8L5C6|XIP1_WHEAT	R.ALATGIFER.V	Y	81.28	976.534	9	3.7	489.274	2	17.21				520090				63830										352170			641960					451080								115650
103	232	Q8L5C6|XIP1_WHEAT	K.TGQVTVFWGR.N	Y	80.25	1149.59	10	0.3	575.801	2	18.81				41946						14536								36278			67445					24334								22900
103	232	Q8L5C6|XIP1_WHEAT	K.NVYYGVAPVAQKK.D	Y	73.53	1435.78	13	0.1	718.895	2	14.16				33814														22543			33324
125	152	Q9ZP06|MDHM1_ARATH	R.TQDGGTEVVEAK.A	Y	97.79	1232.59	12	0.3	617.299	2	11.66						509490										475180
125	152	Q9ZP06|MDHM1_ARATH	R.DDLFNINAGIVK.N	Y	92.08	1317.69	12	-1.2	659.853	2	21.09						82481										60028												86583
125	152	Q9ZP06|MDHM1_ARATH	K.KLFGVTTLDVVR.A	N	77.55	1346.79	12	0.6	449.936	3	18.77						8151										20935
125	152	Q9ZP06|MDHM1_ARATH	K.RTQDGGTEVVEAK.A	Y	68.08	1388.69	13	0.9	695.349	2	11.03						213540										240650
125	152	Q9ZP06|MDHM1_ARATH	K.LFGVTTLDVVR.A	N	54.5	1218.7	11	-5	610.356	2	21.33
125	152	Q9ZP06|MDHM1_ARATH	K.VAILGAAGGIGQPLALLMK.L	Y	51.64	1792.06	19	-1.9	897.034	2	24.98																3477.9
65	95	P57751|UGPA1_ARATH	K.VQLLEIAQVPDEHVNEFK.S	Y	102.68	2107.09	18	2	703.371	3	19.8	111010				2895.1										191410								152620		25483		32676									113620	17770
65	95	P57751|UGPA1_ARATH	K.SIPSIVELDSLK.V	Y	99.23	1299.73	12	-2.2	650.872	2	21.15	63379														0								80552				27170									31432
65	95	P57751|UGPA1_ARATH	K.VLQLETAAGAAIR.F	Y	81.6	1311.75	13	0.7	656.881	2	17.93	29992											59089			41123								40674													17204	53438
65	95	P57751|UGPA1_ARATH	K.IFNTNNLWVNLK.A	Y	78.65	1474.79	12	-1.6	738.4	2	21.56	49816														90225								88195													28799
65	103	Q9M9P3|UGPA2_ARATH	K.VQLLEIAQVPDEHVNEFK.S	Y	102.68	2107.09	18	2	703.371	3	19.8	111010				2895.1										191410								152620		25483		32676									113620	17770
65	103	Q9M9P3|UGPA2_ARATH	K.SIPSIVELDSLK.V	Y	99.23	1299.73	12	-2.2	650.872	2	21.15	63379														0								80552				27170									31432
65	103	Q9M9P3|UGPA2_ARATH	K.VLQLETAAGAAIR.F	Y	81.6	1311.75	13	0.7	656.881	2	17.93	29992											59089			41123								40674													17204	53438
65	103	Q9M9P3|UGPA2_ARATH	K.IFNTNNLWVNLK.A	Y	78.65	1474.79	12	-1.6	738.4	2	21.56	49816														90225								88195													28799
128	78	P27323|HS901_ARATH	K.HNDDEQYVWESQAGGSFTVTR.D	N	73.81	2425.06	21	-3.6	809.357	3	17.65																								9375.8														6784
128	78	P27323|HS901_ARATH	R.GYEVLYMVDAIDEYAVGQLK.E	Y	73.21	2275.11	20	2	1138.56	2	24.17
128	78	P27323|HS901_ARATH	R.ELISNSSDALDK.I	N	71.76	1290.63	12	-5.9	646.32	2	14.61				14691																10242				13160
128	78	P27323|HS901_ARATH	K.HFSVEGQLEFK.A	N	64.4	1319.65	11	-5.9	660.829	2	16.87																				9558.6				13555														5824.1
128	78	P27323|HS901_ARATH	K.LGIHEDSQNR.G	N	62.72	1167.56	10	0.3	584.786	2	11.35												0				0				4616.2				9834.4
128	78	P27323|HS901_ARATH	R.ELISNSSDALDKIR.F	N	58.76	1559.82	14	-4.4	780.912	2	16.14																				10234				27568
128	78	P27323|HS901_ARATH	K.FYEAFSK.N	N	57.22	890.417	7	-2.8	446.215	2	15.43																								6463.7
43	211	P42644|14333_ARATH	R.YEEMVEFMEK.V	N	95.96	1333.56	10	0	667.783	2	18.7				129360						141850								121780			200310					113880
43	211	P42644|14333_ARATH	K.DSTLIMQLLR.D	N	78.02	1188.65	10	-1.3	595.333	2	24.18				15451																	74485					42215												2871.6
43	211	P42644|14333_ARATH	R.EENVYMAK.L	Y	72.41	982.443	8	1	492.227	2	12.7				231080						136660			30486					144610			240020													32256
43	211	P42644|14333_ARATH	R.NLLSVAYK.N	N	66.08	906.518	8	-0.9	454.264	2	17.31				0				59635		570880			45160					456370			507470					1219500			20910					69795
43	211	P42644|14333_ARATH	R.IISSIEQK.E	N	59.45	916.523	8	0.1	459.267	2	12.98				235080						356600								293710			433680
43	211	P42644|14333_ARATH	K.LAEQAER.Y	N	59.21	815.414	7	0.6	408.713	2	10.7																																		0
45	117	Q9LK99|RAA1G_ARATH	K.AQIWDTAGQER.Y	N	101.18	1273.61	11	0.9	637.807	2	15.25		262250	175400	44337				123370	109530	48281	266250		105600	205940				0			72726					54227								39773
45	117	Q9LK99|RAA1G_ARATH	K.VVLIGDSGVGK.S	Y	80.58	1042.6	11	0.2	522.306	2	16.18		263230	260440					56910	193740		240440		70497	176520				31091			50457					20379								108180
45	117	Q9LK99|RAA1G_ARATH	K.STIGVEFATR.S	N	77.05	1079.56	10	1.7	540.786	2	16.7		98272	0					0	65510	0	0		0	0				0											11208					0
45	117	Q9LK99|RAA1G_ARATH	R.HVTFENVER.W	N	71.74	1129.55	9	1.4	565.782	2	12.84		61810	52044								37777			31012
45	117	Q9LK99|RAA1G_ARATH	R.AITSAYYR.G	N	66.03	943.476	8	1.2	472.744	2	13.73		78678	85681											45338
45	117	Q9LK99|RAA1G_ARATH	R.NEFSLESK.S	N	63.55	952.45	8	1.1	477.232	2	14.79		48644	50738								47901			35861
45	173	Q9FJH0|RAA1F_ARATH	K.AQIWDTAGQER.Y	N	101.18	1273.61	11	0.9	637.807	2	15.25		262250	175400	44337				123370	109530	48281	266250		105600	205940				0			72726					54227								39773
45	173	Q9FJH0|RAA1F_ARATH	K.VVLIGDSGVGK.S	Y	80.58	1042.6	11	0.2	522.306	2	16.18		263230	260440					56910	193740		240440		70497	176520				31091			50457					20379								108180
45	173	Q9FJH0|RAA1F_ARATH	K.STIGVEFATR.S	N	77.05	1079.56	10	1.7	540.786	2	16.7		98272	0					0	65510	0	0		0	0				0											11208					0
45	173	Q9FJH0|RAA1F_ARATH	R.HVTFENVER.W	N	71.74	1129.55	9	1.4	565.782	2	12.84		61810	52044								37777			31012
45	173	Q9FJH0|RAA1F_ARATH	R.AITSAYYR.G	N	66.03	943.476	8	1.2	472.744	2	13.73		78678	85681											45338
45	173	Q9FJH0|RAA1F_ARATH	R.NEFSLESK.S	N	63.55	952.45	8	1.1	477.232	2	14.79		48644	50738								47901			35861
131	127	P80602|BAS1_WHEAT	R.AAAEYDLPLVGNK.A	Y	121.57	1359.7	13	0.5	680.856	2	18.57		43776	23428						23876		60008			33966
131	127	P80602|BAS1_WHEAT	K.SFGVLIPDQGIALR.G	Y	72.38	1484.84	14	-0.8	743.421	2	21.89											17010
131	127	P80602|BAS1_WHEAT	K.YPLVSDVTK.S	Y	63.81	1020.55	9	-0.2	511.279	2	16.06									151330		181420
131	127	P80602|BAS1_WHEAT	K.EGVIQHSTINNLGIGR.S	Y	62.55	1706.91	16	1.2	854.458	2	15.98											43402
131	127	P80602|BAS1_WHEAT	K.LSDYIGKK.Y	Y	59.75	922.512	8	0.7	462.262	2	11.9		0									0
87	113	P25696|ENO2_ARATH	K.VNQIGSVTESIEAVK.M	Y	90.64	1572.84	15	-0.7	787.422	2	17.87	103070						61857								135110								113700										24270			74039
87	113	P25696|ENO2_ARATH	K.YGQDATNVGDEGGFAPNIQENKEGLELLK.T	Y	76.04	3105.49	29	1.5	1036.17	3	19.1	17750														108210								37926
87	113	P25696|ENO2_ARATH	K.YGQDATNVGDEGGFAPNIQENK.E	Y	65.86	2323.04	22	1	1162.52	2	16.13	8371.7
87	113	P25696|ENO2_ARATH	R.DGGSDYLGK.G	Y	65.19	910.403	9	0.2	456.207	2	12.71															4061.3								0
87	113	P25696|ENO2_ARATH	R.SGETEDTFIADLAVGLSTGQIK.T	Y	64.26	2251.12	22	-0.1	1126.57	2	25.51															7592.1								1938.5				2135.6
61	132	O23254|GLYC4_ARATH	K.ISATSIYFESLPYK.V	Y	97.27	1617.83	14	-0.9	809.918	2	20.81					77234										81562								52080		176500		8645									40198	26479
61	132	O23254|GLYC4_ARATH	R.IGAPAMTSR.G	Y	72.06	902.464	9	0.6	452.238	2	13.15												519250			8746.6								7370.4
61	132	O23254|GLYC4_ARATH	R.AGMIFYR.K	N	64.64	856.427	7	0	429.221	2	17.47	18202											195170													6933.1											10778	72047
61	132	O23254|GLYC4_ARATH	K.GLVNNKDLDQLK.A	Y	53.85	1355.74	12	1	678.876	2	14.57
61	132	O23254|GLYC4_ARATH	K.NAVFGDSSALAPGGVR.I	Y	52.27	1516.76	16	2.4	759.388	2	17.27	6804.2
35	146	Q93VT9|RL101_ARATH	K.ENVSSEALEAAR.I	Y	98.27	1274.61	12	-0.3	638.309	2	14.33		784430	852460			0	13973	95697	497230		886060		103400	547650		0																		55211
35	146	Q93VT9|RL101_ARATH	R.VHPFHVLR.I	Y	93.16	1003.57	8	0.6	502.791	2	13		27372							77628		53596																							20356
35	146	Q93VT9|RL101_ARATH	R.VAIGQVLLSVR.C	Y	75.32	1153.72	11	0.8	577.864	2	21.33		73443	46979	0				18694	97731		155780		46546	53458							24747					0								8779.9	0
35	146	Q93VT9|RL101_ARATH	R.IYDVGMK.R	Y	69.49	824.41	7	-0.1	413.21	2	14.27		367210	253790					41614	186250		306150		37553	180500																				16608
35	176	Q08770|RL102_ARATH	K.ENVSSEALEAAR.I	Y	98.27	1274.61	12	-0.3	638.309	2	14.33		784430	852460			0	13973	95697	497230		886060		103400	547650		0																		55211
35	176	Q08770|RL102_ARATH	R.VHPFHVLR.I	Y	93.16	1003.57	8	0.6	502.791	2	13		27372							77628		53596																							20356
35	176	Q08770|RL102_ARATH	R.VAIGQVLLSVR.C	Y	75.32	1153.72	11	0.8	577.864	2	21.33		73443	46979	0				18694	97731		155780		46546	53458							24747					0								8779.9	0
35	176	Q08770|RL102_ARATH	R.IYDVGMK.R	Y	69.49	824.41	7	-0.1	413.21	2	14.27		367210	253790					41614	186250		306150		37553	180500																				16608
35	190	Q93W22|RL103_ARATH	K.ENVSSEALEAAR.I	Y	98.27	1274.61	12	-0.3	638.309	2	14.33		784430	852460			0	13973	95697	497230		886060		103400	547650		0																		55211
35	190	Q93W22|RL103_ARATH	R.VHPFHVLR.I	Y	93.16	1003.57	8	0.6	502.791	2	13		27372							77628		53596																							20356
35	190	Q93W22|RL103_ARATH	R.VAIGQVLLSVR.C	Y	75.32	1153.72	11	0.8	577.864	2	21.33		73443	46979	0				18694	97731		155780		46546	53458							24747					0								8779.9	0
35	190	Q93W22|RL103_ARATH	R.IYDVGMK.R	Y	69.49	824.41	7	-0.1	413.21	2	14.27		367210	253790					41614	186250		306150		37553	180500																				16608
89	83	Q9SEI4|PRS6B_ARATH	R.GVLLYGPPGTGK.T	N	93.82	1157.64	12	-1.2	579.829	2	17.72			9287.8	58010	48008		23980			33583		105260	4716.1	4651.4				40876													13038			12339			33867
89	83	Q9SEI4|PRS6B_ARATH	K.ENAPAIIFIDEVDAIATAR.F	Y	77.56	2028.05	19	3.6	1015.03	2	27.34					6059
89	83	Q9SEI4|PRS6B_ARATH	R.ELLKPSASVALHR.H	Y	76.72	1419.82	13	2	474.279	3	14.34												52086
89	83	Q9SEI4|PRS6B_ARATH	R.FDAQTGADR.E	Y	76.41	979.436	9	2	490.724	2	11.46					15324							34235
89	83	Q9SEI4|PRS6B_ARATH	K.QIGIDPPR.G	Y	70.06	894.492	8	1.2	448.252	2	14.85							10367			4756		73827
89	83	Q9SEI4|PRS6B_ARATH	R.VVGSEFVQK.Y	Y	68.15	991.534	9	0.8	496.773	2	14.14					0							135800
115	201	Q9LF98|ALFC8_ARATH	K.GILAADESTGTIGKR.L	Y	92.68	1487.79	15	-0.2	744.901	2	14.21						485240										473540					37715							147570
115	201	Q9LF98|ALFC8_ARATH	K.GILAADESTGTIGK.R	Y	90.55	1331.69	14	0.2	666.851	2	15.65						351190										235080												197060
115	201	Q9LF98|ALFC8_ARATH	K.ANSEATLGTYK.G	Y	80.9	1153.56	11	2.2	577.787	2	12.97						100790										74678												18473
115	201	Q9LF98|ALFC8_ARATH	K.YYEAGAR.F	Y	67.61	828.377	7	2.2	415.195	2	11.18						59500										47206
115	201	Q9LF98|ALFC8_ARATH	R.ALQQSTLK.T	Y	54.96	887.508	8	0.3	444.759	2	11.84																107310
126	73	Q42560|ACO1_ARATH	K.TSLAPGSGVVTK.Y	N	66.02	1115.62	12	-0.4	558.816	2	14																			7276.1			10288
126	73	Q42560|ACO1_ARATH	K.QVEIPFKPAR.V	N	61.04	1183.67	10	-1.9	592.842	2	16.15
126	73	Q42560|ACO1_ARATH	K.ILDWENTSPK.Q	Y	60.46	1201.6	10	-5.3	601.803	2	16.4																	31327					35430
126	73	Q42560|ACO1_ARATH	K.STYIHEPPYFK.G	Y	58.81	1380.67	11	-3.7	691.34	2	16.03
126	73	Q42560|ACO1_ARATH	K.INPLVPVDLVIDHSVQVDVAR.S	N	52.67	2297.27	21	-0.1	766.765	3	23.67																																0
68	186	P46286|RL81_ARATH	R.LRGQAAASAAK.A	Y	95.9	1042.59	11	1.3	522.299	2	10.38				95665						241710								219770			77722
68	186	P46286|RL81_ARATH	R.AMIGQVAGGGR.T	Y	83.85	1015.52	11	0.7	508.767	2	13.67		0		625150					0	515910	0			0				339250			693020					4994.8
68	186	P46286|RL81_ARATH	R.SLDFGER.N	Y	58.78	822.387	7	-0.5	412.199	2	14.95				411200						453560								0			421490					572790
68	186	P46286|RL81_ARATH	R.TEKPMLK.A	Y	56.38	845.468	7	1.1	423.74	2	11.07																					6659
106	142	Q9SS45|PAL4_ARATH	R.TSPQWLGPQIEVIR.A	N	98.92	1622.88	14	-1.4	812.445	2	21.01																				144170				157900											76344			196760
106	142	Q9SS45|PAL4_ARATH	R.FEILEAITK.L	Y	75.77	1062.6	9	-1.6	532.304	2	21.12																				98856				92781											47379			141700
106	142	Q9SS45|PAL4_ARATH	R.NPSLDYGFK.G	N	69.27	1039.5	9	1.9	520.757	2	16.49																				25682				20462											6741.7			1366.3
106	142	Q9SS45|PAL4_ARATH	K.TAEAVDILK.L	Y	67.97	958.533	9	-4.9	480.272	2	16.53																				35026				28449
106	142	Q9SS45|PAL4_ARATH	R.HLEENLK.K	Y	53.48	881.461	7	-6.5	441.736	2	11.07																				7281.4
106	142	Q9SS45|PAL4_ARATH	R.KTAEAVDILK.L	Y	52.24	1086.63	10	-3.1	544.32	2	14.64																								30721
92	264	P41127|RL131_ARATH	K.HWQNYVK.T	N	88.38	973.477	7	0.3	487.743	2	12.64				384310						235610								229000			480360
92	264	P41127|RL131_ARATH	K.TWFNQPAR.K	N	78.19	1018.5	8	-0.1	510.256	2	16.35				605710						613780								445930			766080					635630
92	264	P41127|RL131_ARATH	K.GFTLEELK.A	N	74.34	935.496	8	-0.5	468.753	2	18.45				297450						319730								256190			215860					553010
92	264	P41127|RL131_ARATH	K.KHWQNYVK.T	N	64.29	1101.57	8	1.1	551.791	2	11.38				59700																	77880
92	264	P41127|RL131_ARATH	K.TWFNQPARK.T	N	59.64	1146.59	9	1.9	574.302	2	14.1										204720											294770
97	107	Q6W8Q2|REHY_WHEAT	R.TLHIVGPDK.K	Y	89.69	978.55	9	0	490.28	2	13.47		58138	46770						45234		48301			24359
97	107	Q6W8Q2|REHY_WHEAT	K.VTYPIMADPDR.S	Y	74.73	1276.61	11	0.5	639.311	2	17.05		79834	127590						143400		299760			59022
97	107	Q6W8Q2|REHY_WHEAT	K.DIEAYKPGSK.V	Y	72.28	1106.56	10	0.9	554.285	2	12.33		53347	44423						18747		40156			28928
97	107	Q6W8Q2|REHY_WHEAT	R.TLHIVGPDKK.V	Y	55.42	1106.64	10	0.7	554.327	2	12.06		4294.5							3087.2
97	107	Q6W8Q2|REHY_WHEAT	R.AVDSLLTAAK.H	Y	55.24	987.56	10	-0.7	494.784	2	16.53			33239								46060			30450
97	107	Q6W8Q2|REHY_WHEAT	R.NMDEVVR.A	Y	54.77	861.401	7	1.5	431.707	2	12.76		7493.2
54	141	Q9FX54|G3PC2_ARATH	R.VPTVDVSVVDLTVR.L	Y	95.25	1497.84	14	-5.2	749.923	2	21.02		3018.7		14495		9331.9			0	5827.1	5054.4		5636.4			10317		0			17292	17414				9023.7
54	141	Q9FX54|G3PC2_ARATH	R.AASFNIIPSSTGAAK.A	Y	95.25	1433.75	15	0.1	717.88	2	17.99		85808	97725	161190		323120	46092	66077	79985	163360	78340		53010	48639		270700		156130			173290					163070		295490	22030					104640
54	141	Q9FX54|G3PC2_ARATH	K.KVVISAPSK.D	Y	57.16	927.575	9	1.8	464.793	2	11.85													42024
54	141	Q9FX54|G3PC2_ARATH	R.IGINGFGR.I	Y	51.22	832.456	8	-0.1	417.233	2	16.5						42118
54	162	P25858|G3PC1_ARATH	R.VPTVDVSVVDLTVR.L	Y	95.25	1497.84	14	-5.2	749.923	2	21.02		3018.7		14495		9331.9			0	5827.1	5054.4		5636.4			10317		0			17292	17414				9023.7
54	162	P25858|G3PC1_ARATH	R.AASFNIIPSSTGAAK.A	Y	95.25	1433.75	15	0.1	717.88	2	17.99		85808	97725	161190		323120	46092	66077	79985	163360	78340		53010	48639		270700		156130			173290					163070		295490	22030					104640
54	162	P25858|G3PC1_ARATH	K.KVVISAPSK.D	Y	57.16	927.575	9	1.8	464.793	2	11.85													42024
54	162	P25858|G3PC1_ARATH	R.IGINGFGR.I	Y	51.22	832.456	8	-0.1	417.233	2	16.5						42118
50	290	Q3E7K8|UBQ12_ARATH	K.ESTLHLVLR.L	Y	103.4	1066.61	9	1.2	534.313	2	16.6		41349		93591	22729		17451	28356	55876	55670	84635			23957		20837	16350	68405	11856	8894.8	136920	14941		10295		182550		26119	4690.8			2148.6		21413	1618.2
50	290	Q3E7K8|UBQ12_ARATH	K.IQDKEGIPPDQQR.L	Y	84.89	1522.77	13	1.9	762.391	2	11.46		151720	59171	297930			18016			135030	65585		15383	45411				214900			346260
50	290	Q3E7K8|UBQ12_ARATH	R.TLADYNIQK.E	Y	69.5	1064.55	9	1.8	533.282	2	14.48		107510		0				39327		135270	94469			86788				112290			189410
50	290	Q3E7K8|UBQ12_ARATH	K.TITLEVESSDTIDNVK.A	Y	58.71	1762.88	16	-0.5	882.449	2	17.89										25878
50	290	Q3E7K8|UBQ12_ARATH	K.EGIPPDQQR.L	Y	51.06	1038.51	9	4.1	520.262	2	11.55			62080
50	302	Q8RUC6|RUB2_ARATH	K.ESTLHLVLR.L	Y	103.4	1066.61	9	1.2	534.313	2	16.6		41349		93591	22729		17451	28356	55876	55670	84635			23957		20837	16350	68405	11856	8894.8	136920	14941		10295		182550		26119	4690.8			2148.6		21413	1618.2
50	302	Q8RUC6|RUB2_ARATH	K.IQDKEGIPPDQQR.L	Y	84.89	1522.77	13	1.9	762.391	2	11.46		151720	59171	297930			18016			135030	65585		15383	45411				214900			346260
50	302	Q8RUC6|RUB2_ARATH	R.TLADYNIQK.E	Y	69.5	1064.55	9	1.8	533.282	2	14.48		107510		0				39327		135270	94469			86788				112290			189410
50	302	Q8RUC6|RUB2_ARATH	K.TITLEVESSDTIDNVK.A	Y	58.71	1762.88	16	-0.5	882.449	2	17.89										25878
50	302	Q8RUC6|RUB2_ARATH	K.EGIPPDQQR.L	Y	51.06	1038.51	9	4.1	520.262	2	11.55			62080
50	303	Q9SHE7|RUB1_ARATH	K.ESTLHLVLR.L	Y	103.4	1066.61	9	1.2	534.313	2	16.6		41349		93591	22729		17451	28356	55876	55670	84635			23957		20837	16350	68405	11856	8894.8	136920	14941		10295		182550		26119	4690.8			2148.6		21413	1618.2
50	303	Q9SHE7|RUB1_ARATH	K.IQDKEGIPPDQQR.L	Y	84.89	1522.77	13	1.9	762.391	2	11.46		151720	59171	297930			18016			135030	65585		15383	45411				214900			346260
50	303	Q9SHE7|RUB1_ARATH	R.TLADYNIQK.E	Y	69.5	1064.55	9	1.8	533.282	2	14.48		107510		0				39327		135270	94469			86788				112290			189410
50	303	Q9SHE7|RUB1_ARATH	K.TITLEVESSDTIDNVK.A	Y	58.71	1762.88	16	-0.5	882.449	2	17.89										25878
50	303	Q9SHE7|RUB1_ARATH	K.EGIPPDQQR.L	Y	51.06	1038.51	9	4.1	520.262	2	11.55			62080
50	307	Q9FHQ6|UBQ9_ARATH	K.ESTLHLVLR.L	Y	103.4	1066.61	9	1.2	534.313	2	16.6		41349		93591	22729		17451	28356	55876	55670	84635			23957		20837	16350	68405	11856	8894.8	136920	14941		10295		182550		26119	4690.8			2148.6		21413	1618.2
50	307	Q9FHQ6|UBQ9_ARATH	K.IQDKEGIPPDQQR.L	Y	84.89	1522.77	13	1.9	762.391	2	11.46		151720	59171	297930			18016			135030	65585		15383	45411				214900			346260
50	307	Q9FHQ6|UBQ9_ARATH	R.TLADYNIQK.E	Y	69.5	1064.55	9	1.8	533.282	2	14.48		107510		0				39327		135270	94469			86788				112290			189410
50	307	Q9FHQ6|UBQ9_ARATH	K.TITLEVESSDTIDNVK.A	Y	58.71	1762.88	16	-0.5	882.449	2	17.89										25878
50	307	Q9FHQ6|UBQ9_ARATH	K.EGIPPDQQR.L	Y	51.06	1038.51	9	4.1	520.262	2	11.55			62080
50	322	P59233|R27AC_ARATH	K.ESTLHLVLR.L	Y	103.4	1066.61	9	1.2	534.313	2	16.6		41349		93591	22729		17451	28356	55876	55670	84635			23957		20837	16350	68405	11856	8894.8	136920	14941		10295		182550		26119	4690.8			2148.6		21413	1618.2
50	322	P59233|R27AC_ARATH	K.IQDKEGIPPDQQR.L	Y	84.89	1522.77	13	1.9	762.391	2	11.46		151720	59171	297930			18016			135030	65585		15383	45411				214900			346260
50	322	P59233|R27AC_ARATH	R.TLADYNIQK.E	Y	69.5	1064.55	9	1.8	533.282	2	14.48		107510		0				39327		135270	94469			86788				112290			189410
50	322	P59233|R27AC_ARATH	K.TITLEVESSDTIDNVK.A	Y	58.71	1762.88	16	-0.5	882.449	2	17.89										25878
50	322	P59233|R27AC_ARATH	K.EGIPPDQQR.L	Y	51.06	1038.51	9	4.1	520.262	2	11.55			62080
50	327	P59271|R27AA_ARATH	K.ESTLHLVLR.L	Y	103.4	1066.61	9	1.2	534.313	2	16.6		41349		93591	22729		17451	28356	55876	55670	84635			23957		20837	16350	68405	11856	8894.8	136920	14941		10295		182550		26119	4690.8			2148.6		21413	1618.2
50	327	P59271|R27AA_ARATH	K.IQDKEGIPPDQQR.L	Y	84.89	1522.77	13	1.9	762.391	2	11.46		151720	59171	297930			18016			135030	65585		15383	45411				214900			346260
50	327	P59271|R27AA_ARATH	R.TLADYNIQK.E	Y	69.5	1064.55	9	1.8	533.282	2	14.48		107510		0				39327		135270	94469			86788				112290			189410
50	327	P59271|R27AA_ARATH	K.TITLEVESSDTIDNVK.A	Y	58.71	1762.88	16	-0.5	882.449	2	17.89										25878
50	327	P59271|R27AA_ARATH	K.EGIPPDQQR.L	Y	51.06	1038.51	9	4.1	520.262	2	11.55			62080
50	328	P59232|R27AB_ARATH	K.ESTLHLVLR.L	Y	103.4	1066.61	9	1.2	534.313	2	16.6		41349		93591	22729		17451	28356	55876	55670	84635			23957		20837	16350	68405	11856	8894.8	136920	14941		10295		182550		26119	4690.8			2148.6		21413	1618.2
50	328	P59232|R27AB_ARATH	K.IQDKEGIPPDQQR.L	Y	84.89	1522.77	13	1.9	762.391	2	11.46		151720	59171	297930			18016			135030	65585		15383	45411				214900			346260
50	328	P59232|R27AB_ARATH	R.TLADYNIQK.E	Y	69.5	1064.55	9	1.8	533.282	2	14.48		107510		0				39327		135270	94469			86788				112290			189410
50	328	P59232|R27AB_ARATH	K.TITLEVESSDTIDNVK.A	Y	58.71	1762.88	16	-0.5	882.449	2	17.89										25878
50	328	P59232|R27AB_ARATH	K.EGIPPDQQR.L	Y	51.06	1038.51	9	4.1	520.262	2	11.55			62080
50	344	P0CH33|UBQ11_ARATH	K.ESTLHLVLR.L	Y	103.4	1066.61	9	1.2	534.313	2	16.6		41349		93591	22729		17451	28356	55876	55670	84635			23957		20837	16350	68405	11856	8894.8	136920	14941		10295		182550		26119	4690.8			2148.6		21413	1618.2
50	344	P0CH33|UBQ11_ARATH	K.IQDKEGIPPDQQR.L	Y	84.89	1522.77	13	1.9	762.391	2	11.46		151720	59171	297930			18016			135030	65585		15383	45411				214900			346260
50	344	P0CH33|UBQ11_ARATH	R.TLADYNIQK.E	Y	69.5	1064.55	9	1.8	533.282	2	14.48		107510		0				39327		135270	94469			86788				112290			189410
50	344	P0CH33|UBQ11_ARATH	K.TITLEVESSDTIDNVK.A	Y	58.71	1762.88	16	-0.5	882.449	2	17.89										25878
50	344	P0CH33|UBQ11_ARATH	K.EGIPPDQQR.L	Y	51.06	1038.51	9	4.1	520.262	2	11.55			62080
50	345	Q3E7T8|UBQ14_ARATH	K.ESTLHLVLR.L	Y	103.4	1066.61	9	1.2	534.313	2	16.6		41349		93591	22729		17451	28356	55876	55670	84635			23957		20837	16350	68405	11856	8894.8	136920	14941		10295		182550		26119	4690.8			2148.6		21413	1618.2
50	345	Q3E7T8|UBQ14_ARATH	K.IQDKEGIPPDQQR.L	Y	84.89	1522.77	13	1.9	762.391	2	11.46		151720	59171	297930			18016			135030	65585		15383	45411				214900			346260
50	345	Q3E7T8|UBQ14_ARATH	R.TLADYNIQK.E	Y	69.5	1064.55	9	1.8	533.282	2	14.48		107510		0				39327		135270	94469			86788				112290			189410
50	345	Q3E7T8|UBQ14_ARATH	K.TITLEVESSDTIDNVK.A	Y	58.71	1762.88	16	-0.5	882.449	2	17.89										25878
50	345	Q3E7T8|UBQ14_ARATH	K.EGIPPDQQR.L	Y	51.06	1038.51	9	4.1	520.262	2	11.55			62080
50	346	Q1EC66|UBQ3_ARATH	K.ESTLHLVLR.L	Y	103.4	1066.61	9	1.2	534.313	2	16.6		41349		93591	22729		17451	28356	55876	55670	84635			23957		20837	16350	68405	11856	8894.8	136920	14941		10295		182550		26119	4690.8			2148.6		21413	1618.2
50	346	Q1EC66|UBQ3_ARATH	K.IQDKEGIPPDQQR.L	Y	84.89	1522.77	13	1.9	762.391	2	11.46		151720	59171	297930			18016			135030	65585		15383	45411				214900			346260
50	346	Q1EC66|UBQ3_ARATH	R.TLADYNIQK.E	Y	69.5	1064.55	9	1.8	533.282	2	14.48		107510		0				39327		135270	94469			86788				112290			189410
50	346	Q1EC66|UBQ3_ARATH	K.TITLEVESSDTIDNVK.A	Y	58.71	1762.88	16	-0.5	882.449	2	17.89										25878
50	346	Q1EC66|UBQ3_ARATH	K.EGIPPDQQR.L	Y	51.06	1038.51	9	4.1	520.262	2	11.55			62080
50	347	P0CH32|UBQ4_ARATH	K.ESTLHLVLR.L	Y	103.4	1066.61	9	1.2	534.313	2	16.6		41349		93591	22729		17451	28356	55876	55670	84635			23957		20837	16350	68405	11856	8894.8	136920	14941		10295		182550		26119	4690.8			2148.6		21413	1618.2
50	347	P0CH32|UBQ4_ARATH	K.IQDKEGIPPDQQR.L	Y	84.89	1522.77	13	1.9	762.391	2	11.46		151720	59171	297930			18016			135030	65585		15383	45411				214900			346260
50	347	P0CH32|UBQ4_ARATH	R.TLADYNIQK.E	Y	69.5	1064.55	9	1.8	533.282	2	14.48		107510		0				39327		135270	94469			86788				112290			189410
50	347	P0CH32|UBQ4_ARATH	K.TITLEVESSDTIDNVK.A	Y	58.71	1762.88	16	-0.5	882.449	2	17.89										25878
50	347	P0CH32|UBQ4_ARATH	K.EGIPPDQQR.L	Y	51.06	1038.51	9	4.1	520.262	2	11.55			62080
50	348	Q8H159|UBQ10_ARATH	K.ESTLHLVLR.L	Y	103.4	1066.61	9	1.2	534.313	2	16.6		41349		93591	22729		17451	28356	55876	55670	84635			23957		20837	16350	68405	11856	8894.8	136920	14941		10295		182550		26119	4690.8			2148.6		21413	1618.2
50	348	Q8H159|UBQ10_ARATH	K.IQDKEGIPPDQQR.L	Y	84.89	1522.77	13	1.9	762.391	2	11.46		151720	59171	297930			18016			135030	65585		15383	45411				214900			346260
50	348	Q8H159|UBQ10_ARATH	R.TLADYNIQK.E	Y	69.5	1064.55	9	1.8	533.282	2	14.48		107510		0				39327		135270	94469			86788				112290			189410
50	348	Q8H159|UBQ10_ARATH	K.TITLEVESSDTIDNVK.A	Y	58.71	1762.88	16	-0.5	882.449	2	17.89										25878
50	348	Q8H159|UBQ10_ARATH	K.EGIPPDQQR.L	Y	51.06	1038.51	9	4.1	520.262	2	11.55			62080
50	357	Q42202|RL40B_ARATH	K.ESTLHLVLR.L	Y	103.4	1066.61	9	1.2	534.313	2	16.6		41349		93591	22729		17451	28356	55876	55670	84635			23957		20837	16350	68405	11856	8894.8	136920	14941		10295		182550		26119	4690.8			2148.6		21413	1618.2
50	357	Q42202|RL40B_ARATH	K.IQDKEGIPPDQQR.L	Y	84.89	1522.77	13	1.9	762.391	2	11.46		151720	59171	297930			18016			135030	65585		15383	45411				214900			346260
50	357	Q42202|RL40B_ARATH	R.TLADYNIQK.E	Y	69.5	1064.55	9	1.8	533.282	2	14.48		107510		0				39327		135270	94469			86788				112290			189410
50	357	Q42202|RL40B_ARATH	K.TITLEVESSDTIDNVK.A	Y	58.71	1762.88	16	-0.5	882.449	2	17.89										25878
50	357	Q42202|RL40B_ARATH	K.EGIPPDQQR.L	Y	51.06	1038.51	9	4.1	520.262	2	11.55			62080
50	358	B9DHA6|RL40A_ARATH	K.ESTLHLVLR.L	Y	103.4	1066.61	9	1.2	534.313	2	16.6		41349		93591	22729		17451	28356	55876	55670	84635			23957		20837	16350	68405	11856	8894.8	136920	14941		10295		182550		26119	4690.8			2148.6		21413	1618.2
50	358	B9DHA6|RL40A_ARATH	K.IQDKEGIPPDQQR.L	Y	84.89	1522.77	13	1.9	762.391	2	11.46		151720	59171	297930			18016			135030	65585		15383	45411				214900			346260
50	358	B9DHA6|RL40A_ARATH	R.TLADYNIQK.E	Y	69.5	1064.55	9	1.8	533.282	2	14.48		107510		0				39327		135270	94469			86788				112290			189410
50	358	B9DHA6|RL40A_ARATH	K.TITLEVESSDTIDNVK.A	Y	58.71	1762.88	16	-0.5	882.449	2	17.89										25878
50	358	B9DHA6|RL40A_ARATH	K.EGIPPDQQR.L	Y	51.06	1038.51	9	4.1	520.262	2	11.55			62080
137	153	P93594|AMYB_WHEAT	R.NIEYLTLGVDDQPLFHGR.T	Y	116.27	2086.05	18	1.2	1044.03	2	20.82	4200.3														35764												7255
137	153	P93594|AMYB_WHEAT	K.SAPEELVQQVLSAGWR.E	Y	80.16	1768.91	16	0.5	885.46	2	24.56															27036																					21679
137	153	P93594|AMYB_WHEAT	K.LFGFTYLR.L	Y	74.97	1015.55	8	-0.5	508.782	2	22.05	225320														137670												61002									108810
63	163	Q96283|RAA2C_ARATH	K.AQIWDTAGQER.Y	N	101.18	1273.61	11	0.9	637.807	2	15.25		262250	175400	44337				123370	109530	48281	266250		105600	205940				0			72726					54227								39773
63	163	Q96283|RAA2C_ARATH	K.SDLNHLR.S	Y	78	853.441	7	1.1	427.726	2	11.49		18120	13758					10521	15893		10565		11328
63	163	Q96283|RAA2C_ARATH	K.STIGVEFATR.T	N	77.05	1079.56	10	1.7	540.786	2	16.7		98272	0					0	65510	0	0		0	0				0											11208					0
63	163	Q96283|RAA2C_ARATH	R.AITSAYYR.G	N	66.03	943.476	8	1.2	472.744	2	13.73		78678	85681											45338
63	163	Q96283|RAA2C_ARATH	K.IVLIGDSGVGK.S	N	54.6	1056.62	11	-0.3	529.314	2	17.08									170240		95972
63	181	Q9LNW1|RAA2B_ARATH	K.AQIWDTAGQER.Y	N	101.18	1273.61	11	0.9	637.807	2	15.25		262250	175400	44337				123370	109530	48281	266250		105600	205940				0			72726					54227								39773
63	181	Q9LNW1|RAA2B_ARATH	K.SDLNHLR.S	Y	78	853.441	7	1.1	427.726	2	11.49		18120	13758					10521	15893		10565		11328
63	181	Q9LNW1|RAA2B_ARATH	K.STIGVEFATR.T	N	77.05	1079.56	10	1.7	540.786	2	16.7		98272	0					0	65510	0	0		0	0				0											11208					0
63	181	Q9LNW1|RAA2B_ARATH	R.AITSAYYR.G	N	66.03	943.476	8	1.2	472.744	2	13.73		78678	85681											45338
63	181	Q9LNW1|RAA2B_ARATH	K.IVLIGDSGVGK.S	N	54.6	1056.62	11	-0.3	529.314	2	17.08									170240		95972
151	147	P92963|RAB1C_ARATH	K.IQDGVFDVSNESYGIK.V	Y	89.49	1769.85	16	-1	885.926	2	18.68		30049	18513								27482			15603
151	147	P92963|RAB1C_ARATH	K.TAQNVEEAFIK.T	Y	85.47	1248.63	11	0.2	625.322	2	16.86		74974	169030								0			42642
151	147	P92963|RAB1C_ARATH	K.LQIWDTAGQESFR.S	Y	67.35	1549.75	13	0.5	775.88	2	19.23		12367							9903.4		22865
151	147	P92963|RAB1C_ARATH	R.GAAGALLVYDITR.R	Y	66.39	1318.72	13	-1.4	660.366	2	20.8
151	147	P92963|RAB1C_ARATH	K.YIIIGDTGVGK.S	Y	56.99	1134.63	11	1.3	568.319	2	17.68		28456
69	155	Q1PEX3|RAA1H_ARATH	K.AQIWDTAGQER.Y	N	101.18	1273.61	11	0.9	637.807	2	15.25		262250	175400	44337				123370	109530	48281	266250		105600	205940				0			72726					54227								39773
69	155	Q1PEX3|RAA1H_ARATH	R.STIGVEFATR.S	N	77.05	1079.56	10	1.7	540.786	2	16.7		98272	0					0	65510	0	0		0	0				0											11208					0
69	155	Q1PEX3|RAA1H_ARATH	R.HVTFENVER.W	N	71.74	1129.55	9	1.4	565.782	2	12.84		61810	52044								37777			31012
69	155	Q1PEX3|RAA1H_ARATH	R.AITSAYYR.G	N	66.03	943.476	8	1.2	472.744	2	13.73		78678	85681											45338
69	155	Q1PEX3|RAA1H_ARATH	K.AEDDYDYLFK.V	Y	58.7	1277.55	10	0.1	639.779	2	19.67		31692
93	236	O81147|PSA6B_ARATH	R.HITIFSPEGR.L	Y	101.26	1155.6	10	-1.5	578.808	2	15.96								254820					147180																12875					237270
93	236	O81147|PSA6B_ARATH	K.ATEIEVGVVR.A	Y	81.01	1071.59	10	-0.4	536.803	2	16.02								134220					137570																12407					116140
93	236	O81147|PSA6B_ARATH	R.NEAAEFR.F	Y	63.07	835.382	7	0.9	418.697	2	12.13								56013					43425																					25324
74	109	P28186|RAE1C_ARATH	K.GQALADEYGIK.F	Y	85.35	1163.58	11	2.5	582.797	2	15.42		97226	85905						96023		92782			60326
74	109	P28186|RAE1C_ARATH	R.NIEQHASDNVNK.I	Y	85.19	1367.64	12	-0.1	684.825	2	10.69		115320	35185						105470		100200		0
74	109	P28186|RAE1C_ARATH	K.LQIWDTAGQER.F	N	84.48	1315.65	11	0.1	658.831	2	17.37		130060	59854						102130		167470			103710
74	109	P28186|RAE1C_ARATH	K.LLLIGDSGVGK.S	N	77.69	1070.63	11	1	536.322	2	18.98		119730	89878						118660		162000			64169
74	109	P28186|RAE1C_ARATH	R.TITTAYYR.G	Y	68.07	987.503	8	0.2	494.756	2	14.02		57843	50397								46925			46057
74	179	Q9LZD4|RAE1D_ARATH	K.GQALADEYGIK.F	Y	85.35	1163.58	11	2.5	582.797	2	15.42		97226	85905						96023		92782			60326
74	179	Q9LZD4|RAE1D_ARATH	K.NIEQHASDNVNK.I	Y	85.19	1367.64	12	-0.1	684.825	2	10.69		115320	35185						105470		100200		0
74	179	Q9LZD4|RAE1D_ARATH	K.LQIWDTAGQER.F	N	84.48	1315.65	11	0.1	658.831	2	17.37		130060	59854						102130		167470			103710
74	179	Q9LZD4|RAE1D_ARATH	K.LLLIGDSGVGK.S	N	77.69	1070.63	11	1	536.322	2	18.98		119730	89878						118660		162000			64169
74	179	Q9LZD4|RAE1D_ARATH	R.TITTAYYR.G	Y	68.07	987.503	8	0.2	494.756	2	14.02		57843	50397								46925			46057
66	170	O49513|RAA1E_ARATH	K.AQLWDTAGQER.Y	N	101.18	1273.61	11	0.9	637.807	2	15.25		262250	175400	44337				123370	109530	48281	266250		105600	205940				0			72726					54227								39773
66	170	O49513|RAA1E_ARATH	K.STIGVEFATR.S	N	77.05	1079.56	10	1.7	540.786	2	16.7		98272	0					0	65510	0	0		0	0				0											11208					0
66	170	O49513|RAA1E_ARATH	R.AITSAYYR.G	N	66.03	943.476	8	1.2	472.744	2	13.73		78678	85681											45338
66	170	O49513|RAA1E_ARATH	R.NEFSIESK.S	N	63.55	952.45	8	1.1	477.232	2	14.79		48644	50738								47901			35861
66	170	O49513|RAA1E_ARATH	K.LVLIGDSGVGK.S	N	54.6	1056.62	11	-0.3	529.314	2	17.08									170240		95972
60	125	Q9SH69|6PGD1_ARATH	R.LPANLVQAQR.D	N	93.81	1108.64	10	1.4	555.323	2	15.17					84953							177790													1650.9								13329
60	125	Q9SH69|6PGD1_ARATH	K.GLLYLGMGVSGGEEGAR.N	Y	93.46	1664.82	17	0.5	833.413	2	20.43					110460							23317													0												13127
60	125	Q9SH69|6PGD1_ARATH	K.GFPISVYNR.T	N	88.01	1051.55	9	0.7	526.778	2	18.01					368780							569870											10482		26451					1777.3			54265				113000
60	125	Q9SH69|6PGD1_ARATH	R.IGLAGLAVMGQNLALNIAEK.G	N	73.48	1995.12	20	-0.2	998.566	2	25.59					3522.8																				24592
133	110	Q41593|SPZ1A_WHEAT	K.LSAEPDFLER.H	N	81.03	1175.58	10	1.4	588.796	2	17.95				263570														199240			194300
133	110	Q41593|SPZ1A_WHEAT	K.AAEVTTQVNSWVEK.V	N	78.71	1560.78	14	0.6	781.393	2	16.75																		111060			148290
133	110	Q41593|SPZ1A_WHEAT	K.YKAETQSVDFQTK.A	N	75.94	1543.75	13	0.7	772.88	2	12.88				78059														57639			75121
133	110	Q41593|SPZ1A_WHEAT	K.GAWTEQFDSYGTK.N	Y	63.14	1488.65	13	1.6	745.331	2	17.28				25520																	18094
133	110	Q41593|SPZ1A_WHEAT	R.IKDILPPGSIDNTTK.L	Y	53.61	1610.89	15	0.7	537.967	3	16.08																					26301
133	110	Q41593|SPZ1A_WHEAT	K.AETQSVDFQTK.A	N	51.96	1252.59	11	1.6	627.302	2	13.18				61199
[truncated: 611 more rows]
[truncated: 110 more columns]
