# Supplementary material for: S-nitrosylated Proteins Involved in Autophagy in <em>Triticum aestivum</em> Roots: A Bottom-Up Proteomics Approach and In Silico Predictive Algorithms
Source: Preprints.org preprint supplement (doi:10.20944/preprints202308.1129.v1), 2023-08-18
Supplement: Supplementary file 4 [file Table S6 Localization of proteins, identified in Triticum aestivum..xls]

## Sheet: Directory
S-nitrosylated proteins involved in autophagy in Triticum aestivum roots: a bottom-up proteomics approach and in silico predictive algorithms
Supporting information 6: Localization of proteins identified in Triticum aestivum
Anastasia Mazina 1, Julia Shumilina 2, Natalia Gazizova 1, Egor Repkin 3, Andrej Frolov 2 and Farida Minibayeva 1,4*
1	Kazan Institute of Biochemistry and Biophysics, FRC Kazan Scientific Center, Russian Academy of Sciences, Kazan, Russian Federation;
2	Laboratory of Analytical Biochemistry and Biotechnology, Timiryazev Institute of Plant Physiology, Russian Academy of Sciences;
3	Saint Petersburg State University, 199034 Saint Petersburg, Russia;
4	Open Lab ‘Biomarker’, Kazan (Volga Region) Federal University, 420008 Kazan, Russia
*Corresponding authors: Farida Minibayeva
Directory
Table S6-1	Localization of proteins isolated from Control plants of Triticum aestivum
Table S6-2	Localization of proteins from Triticum aestivum, treatmented by Antimycin A
Table S6-3	Localization of proteins from Triticum aestivum, treatmented by NO2
Table S6-4	Localization of proteins from Triticum aestivum, treatmented by GSNO

## Sheet: Table S6-1
Table S6-1 Localization of proteins, isolated from Control plants of Triticum aestivum
Apoplast
Protein Group	Protein ID	Accession	-10lgP	Coverage (%)	Coverage (%)																		Area																				#Spec
					Control-1	Control-2	Control-3	Control-4	Control-5	Control-6	Control-7	Control-8	Control-9	Control-10	Control-11	Control-12	Control-13	Control-14	Control-15	Control-16	Control-17	Control-18	Control-1	Control-2	Control-3	Control-4	Control-5	Control-6	Control-7	Control-8	Control-9	Control-10	Control-11	Control-12	Control-13	Control-14	Control-15	Control-16	Control-17	Control-18	#Peptides	#Unique	Control-1	Control-2	Control-3	Control-4	Control-5	Control-6	Control-7
121	217	P26759|GER3_WHEAT	158.22	23	0	0	8	0	0	0	0	0	0	0	0	0	8	0	0	0	0	0			5.8985E4										1.9572E4						4	4	0	0	2	0	0	0	0
Cell wall
Protein Group	Protein ID	Accession	-10lgP	Coverage (%)	Coverage (%)																		Area																				#Spec
					Control-1	Control-2	Control-3	Control-4	Control-5	Control-6	Control-7	Control-8	Control-9	Control-10	Control-11	Control-12	Control-13	Control-14	Control-15	Control-16	Control-17	Control-18	Control-1	Control-2	Control-3	Control-4	Control-5	Control-6	Control-7	Control-8	Control-9	Control-10	Control-11	Control-12	Control-13	Control-14	Control-15	Control-16	Control-17	Control-18	#Peptides	#Unique	Control-1	Control-2	Control-3	Control-4	Control-5	Control-6	Control-7
121	217	P26759|GER3_WHEAT	158.22	23	0	0	8	0	0	0	0	0	0	0	0	0	8	0	0	0	0	0			5.8985E4										1.9572E4						4	4	0	0	2	0	0	0	0
219	586	O04487|EF1G1_ARATH	75.59	2	0	2	2	2	0	0	0	0	0	0	0	0	0	0	0	0	0	0		2.2367E4	4.3625E5	3.2389E5															1	1	0	1	1	1	0	0	0
Chloroplast
Protein Group	Protein ID	Accession	-10lgP	Coverage (%)	Coverage (%)																		Area																				#Spec
					Control-1	Control-2	Control-3	Control-4	Control-5	Control-6	Control-7	Control-8	Control-9	Control-10	Control-11	Control-12	Control-13	Control-14	Control-15	Control-16	Control-17	Control-18	Control-1	Control-2	Control-3	Control-4	Control-5	Control-6	Control-7	Control-8	Control-9	Control-10	Control-11	Control-12	Control-13	Control-14	Control-15	Control-16	Control-17	Control-18	#Peptides	#Unique	Control-1	Control-2	Control-3	Control-4	Control-5	Control-6	Control-7
220	385	O24473|IF2B_WHEAT	89.53	7	0	0	4	4	0	0	0	0	0	0	0	0	0	0	0	0	0	0			1.9729E4	1.0446E4															2	2	0	0	2	1	0	0	0
330	525	Q94AR8|LEUC_ARATH	53.74	3	0	3	0	0	0	0	0	0	0	0	0	0	0	0	0	0	0	0		1.7706E4																	1	1	0	1	0	0	0	0	0
217	267	Q9SZX3|ASSY_ARATH	93.68	3	0	2	0	0	0	0	0	0	0	0	0	2	0	0	0	0	0	0		0										5.6613E4							2	2	0	1	0	0	0	0	0
348	2043	Q9LT69|SERA3_ARATH	54.8	1	0	0	0	0	0	0	0	0	0	0	0	1	0	0	0	0	0	0												1.6833E4							1	1	0	0	0	0	0	0	0
319	759	Q9C5U8|HIS8_ARATH	67.6	3	0	3	0	0	0	0	0	0	0	0	0	0	0	0	0	0	0	0		2.8689E4																	1	1	0	1	0	0	0	0	0
145	101	Q10MQ2|DAPAT_ORYSJ	174.37	17	0	0	0	0	0	0	0	3	0	0	0	0	0	0	0	0	0	0								5.3137E3											6	6	0	0	0	0	0	0	0
210	268	Q9S7B5|THRC1_ARATH	110.64	5	0	5	0	0	0	0	0	0	0	0	0	2	0	0	0	0	0	0		6.4667E4										8.7612E4							2	2	0	2	0	0	0	0	0
222	338	Q8RWV0|TKTC1_ARATH	87.42	3	0	0	0	0	0	0	0	0	0	1	0	0	0	0	0	0	0	0										4.1737E4									2	2	0	0	0	0	0	0	0
173	221	A8MS68|PLPD1_ARATH	131.01	6	3	0	0	0	0	0	0	0	3	0	0	4	0	0	0	0	0	0	5.1251E4								2.657E4			2.8355E4							3	3	2	0	0	0	0	0	0
173	241	F4JLP5|PLPD2_ARATH	131.01	7	4	0	0	0	0	0	0	0	4	0	0	4	0	0	0	0	0	0	5.1251E4								2.657E4			2.8355E4							3	3	2	0	0	0	0	0	0
282	379	Q9C9C4|ENO1_ARATH	71.3	4	0	0	0	0	0	0	4	0	0	0	0	0	0	0	0	0	0	0							2.059E3												1	1	0	0	0	0	0	0	1
222	599	F4IW47|TKTC2_ARATH	87.42	3	0	0	0	0	0	0	0	0	0	1	0	0	0	0	0	0	0	0										4.1737E4									2	2	0	0	0	0	0	0	0
307	609	P29976|AROF_ARATH	53.86	2	0	0	0	0	0	0	0	0	0	0	0	2	0	0	0	0	0	0												8.9331E3							1	1	0	0	0	0	0	0	0
307	400	Q00218|AROG_ARATH	53.86	2	0	0	0	0	0	0	0	0	0	0	0	2	0	0	0	0	0	0												8.9331E3							1	1	0	0	0	0	0	0	0
193	143	Q9LTX9|HSP7G_ARATH	123.8	6	0	0	0	0	0	0	0	0	0	4	0	0	0	0	0	0	0	0										2.0129E4									3	3	0	0	0	0	0	0	0
274	317	Q944P7|AMPL2_ARATH	86.53	3	0	0	0	0	0	0	0	0	3	0	0	0	0	0	0	0	0	0									1.1224E4										1	1	0	0	0	0	0	0	0
117	67	O24396|PURA_WHEAT	223.39	24	0	17	0	0	0	0	0	2	0	0	0	7	0	0	0	0	0	0		1.4461E5						3.6279E3				3.0808E5							9	8	0	6	0	0	0	0	0
131	127	P80602|BAS1_WHEAT	206.62	29	0	0	10	6	0	0	0	0	0	0	0	0	0	0	0	0	6	0			1.752E5	3.3966E4													3.9216E4		5	5	0	0	3	4	0	0	0
165	90	Q1XIR9|HGL1A_WHEAT	156.88	13	0	0	0	0	0	0	0	0	0	0	0	7	0	0	0	0	0	0												3.0307E4							7	5	0	0	0	0	0	0	0
181	114	D5MTF8|HGL1D_WHEAT	120.07	7	0	0	0	0	0	0	0	0	0	0	0	5	0	0	0	0	0	0												5.769E4							3	1	0	0	0	0	0	0	0
316	634	P46309|GSH1_ARATH	56.88	2	0	2	0	0	0	0	0	0	0	0	0	0	0	0	0	0	0	0		1.4801E4																	1	1	0	1	0	0	0	0	0
316	1920	O23736|GSH1_BRAJU	56.88	2	0	2	0	0	0	0	0	0	0	0	0	0	0	0	0	0	0	0		1.4801E4																	1	1	0	1	0	0	0	0	0
60	125	Q9SH69|6PGD1_ARATH	188.25	11	0	11	0	0	0	0	0	0	0	0	0	7	0	0	0	4	0	0		1.1046E5										1.408E5							4	1	0	8	0	0	0	0	0
132	476	Q00917|SUS2_ARATH	118.79	2	0	0	0	0	0	0	0	0	0	2	0	0	0	0	0	0	0	0										2.7163E4									2	1	0	0	0	0	0	0	0
153	306	Q43199|APT1_WHEAT	164.59	29	0	0	13	0	0	0	0	0	0	0	0	0	0	0	0	0	5	0			6.205E4														4.2149E4		4	4	0	0	2	0	0	0	0
140	200	Q42669|ACOHC_CUCMC	165.66	6	0	0	0	0	0	2	0	0	0	0	0	0	0	0	0	0	0	6						1.003E4												1.3464E4	3	1	0	0	0	0	0	3	0
160	85	Q03387|IF4G1_WHEAT	179.4	7	0	0	0	0	0	0	0	1	0	0	0	0	0	0	0	0	1	0								0									2.4349E4		6	6	0	0	0	0	0	0	0
Cytoplasm
Protein Group	Protein ID	Accession	-10lgP	Coverage (%)	Coverage (%)																		Area																				#Spec
					Control-1	Control-2	Control-3	Control-4	Control-5	Control-6	Control-7	Control-8	Control-9	Control-10	Control-11	Control-12	Control-13	Control-14	Control-15	Control-16	Control-17	Control-18	Control-1	Control-2	Control-3	Control-4	Control-5	Control-6	Control-7	Control-8	Control-9	Control-10	Control-11	Control-12	Control-13	Control-14	Control-15	Control-16	Control-17	Control-18	#Peptides	#Unique	Control-1	Control-2	Control-3	Control-4	Control-5	Control-6	Control-7
17	81	O50008|METE1_ARATH	285.94	15	0	0	1	1	0	2	0	1	1	10	1	0	0	7	0	2	1	0			9.2351E4	4.1391E4		8.3813E3		5.3146E3	9.3474E3	8.183E5	4.0419E2			2.7826E4		1.8858E3	4.9001E4		10	10	0	0	1	2	0	2	0
275	812	Q9LTB2|MMT1_ARATH	60.41	1	0	0	0	0	0	1	0	0	0	0	0	0	0	0	0	0	0	0						4.9446E3													1	1	0	0	0	0	0	1	0
106	142	Q9SS45|PAL4_ARATH	196.3	7	0	0	0	0	0	0	0	0	0	1	0	0	0	3	0	0	0	0										4.4327E3				3.0615E3					6	4	0	0	0	0	0	0	0
206	436	Q9M1R2|SYPC_ARATH	102.95	4	0	0	0	0	0	0	4	0	4	0	0	0	0	0	0	0	0	0							8.3124E3		2.1947E4										1	1	0	0	0	0	0	0	2
80	91	P23686|METK1_ARATH	227.63	23	0	8	0	0	3	0	0	6	0	0	0	9	0	0	0	0	0	0		4.0299E4																	7	2	0	2	0	0	1	0	0
61	132	O23254|GLYC4_ARATH	203.78	15	7	9	0	0	0	0	3	0	7	0	0	11	0	0	0	2	0	0	1.9452E4	2.9312E5					8.645E3		4.541E4			1.0998E6				2.2877E3			6	5	6	6	0	0	0	0	1
134	509	Q9SVM4|GLYC5_ARATH	93.9	3	1	1	0	0	0	0	0	0	1	0	0	3	0	0	0	0	0	0												2.36E5							2	1	2	1	0	0	0	0	0
179	505	Q9LM59|GLYC6_ARATH	84.34	2	0	2	0	0	0	0	0	0	0	0	0	2	0	0	0	0	0	0		2.2265E5										4.3152E5							1	1	0	2	0	0	0	0	0
179	943	Q84WV0|GLYC7_ARATH	84.34	2	0	2	0	0	0	0	0	0	0	0	0	2	0	0	0	0	0	0		2.2265E5										4.3152E5							1	1	0	2	0	0	0	0	0
286	1140	Q67XD9|CINV2_ARATH	55.43	2	0	0	0	0	0	0	0	0	0	0	0	2	0	0	0	0	0	0												3.4378E4							1	1	0	0	0	0	0	0	0
135	46	Q9LKJ3|PHSH_WHEAT	246.04	17	0	0	0	0	0	0	0	0	0	10	0	0	0	0	0	0	0	0										3.4342E4									11	11	0	0	0	0	0	0	0
137	153	P93594|AMYB_WHEAT	193.75	8	5	0	0	0	0	0	5	0	5	0	0	0	0	0	0	0	0	0	2.2952E5						6.8257E4		1.3049E5										3	3	4	0	0	0	0	0	3
157	131	Q9SRZ6|ICDHC_ARATH	163.72	14	0	0	3	0	5	0	0	0	0	0	0	0	0	0	0	0	0	0					1.1889E3														5	2	0	0	1	0	2	0	0
115	201	Q9LF98|ALFC8_ARATH	201.06	11	0	0	0	0	0	0	0	0	0	0	0	4	0	0	0	0	0	0												1.2723E4							5	5	0	0	0	0	0	0	0
194	244	Q9FI53|FUM2_ARATH	140.45	4	0	4	0	0	0	0	0	0	0	0	0	4	0	0	0	0	0	0		1.851E4										2.5156E4							2	1	0	3	0	0	0	0	0
226	230	Q93VR3|GME_ARATH	109.34	8	0	6	0	0	0	0	0	0	0	0	0	0	0	0	0	0	0	0		8.2087E4																	3	3	0	2	0	0	0	0	0
59	29	Q9MAH0|CAPP1_ARATH	265.54	17	0	0	0	0	0	10	0	0	0	0	0	0	0	0	0	0	0	17						6.3808E4												1.9293E5	13	3	0	0	0	0	0	10	0
71	33	Q5GM68|CAPP2_ARATH	266.39	17	0	0	0	0	0	4	0	0	0	0	0	0	0	0	0	0	0	14																		3.7714E4	13	3	0	0	0	0	0	5	0
108	534	Q9M1B9|SCRK4_ARATH	128.24	7	0	0	0	4	0	0	0	0	0	0	0	0	0	0	0	0	0	0				3.608E3															2	1	0	0	0	1	0	0	0
65	95	P57751|UGPA1_ARATH	212.52	13	13	4	0	0	0	0	6	0	12	0	0	8	0	0	0	0	0	0	2.6502E5	2.8951E3					5.9846E4		1.9106E5			1.8298E5							5	5	11	1	0	0	0	0	5
65	103	Q9M9P3|UGPA2_ARATH	212.52	13	13	4	0	0	0	0	6	0	12	0	0	8	0	0	0	0	0	0	2.6502E5	2.8951E3					5.9846E4		1.9106E5			1.8298E5							5	5	11	1	0	0	0	0	5
46	149	Q8LRM8|TCTP_WHEAT	258.67	44	0	0	33	30	0	0	0	0	0	0	0	0	14	0	0	0	15	0			7.0619E5	5.0998E5									2.4164E4				2.6803E5		8	8	0	0	13	15	0	0	0
41	24	Q9ZRB7|TBA_WHEAT	288.73	48	7	27	0	0	11	4	3	2	13	3	0	13	0	0	0	4	4	16		2.5725E5						9.2879E3	0			2.0268E5							16	4	2	12	0	0	3	1	2
30	16	Q9ZRB2|TBB1_WHEAT	282.92	41	9	20	0	0	2	0	16	5	19	0	0	20	0	0	0	0	0	5		5.013E4						5.0415E3				5.918E4							17	1	3	10	0	0	1	0	9
18	12	Q9ZRB0|TBB3_WHEAT	307.49	54	14	20	0	0	4	0	19	3	16	0	0	23	0	0	0	0	0	5	1.1938E4						5.827E3					7.5034E3							20	2	5	13	0	0	3	0	10
23	17	Q9ZRA9|TBB4_WHEAT	294.49	42	11	24	0	0	4	0	16	3	17	0	0	21	0	0	0	0	0	5																			17	0	4	13	0	0	3	0	9
30	13	Q9ZRA8|TBB5_WHEAT	282.92	40	9	20	0	0	2	0	15	5	19	0	0	20	0	0	0	0	0	5		5.013E4						5.0415E3				5.918E4							17	1	3	10	0	0	1	0	9
175	124	Q9ZUY6|AXS1_ARATH	177.29	17	0	0	0	0	0	0	0	3	0	0	0	0	0	0	0	0	0	0								7.2717E3											6	6	0	0	0	0	0	0	0
175	118	Q9SGE0|AXS2_ARATH	177.29	17	0	0	0	0	0	0	0	3	0	0	0	0	0	0	0	0	0	0								7.2717E3											6	6	0	0	0	0	0	0	0
158	514	Q9SGY2|ACLA1_ARATH	111.48	4	0	2	0	0	0	0	0	4	0	0	0	4	0	0	0	0	0	0		3.8823E4						2.116E4				3.9477E4							2	2	0	1	0	0	0	0	0
158	508	O22718|ACLA2_ARATH	111.48	4	0	2	0	0	0	0	0	4	0	0	0	4	0	0	0	0	0	0		3.8823E4						2.116E4				3.9477E4							2	2	0	1	0	0	0	0	0
158	499	O80526|ACLA3_ARATH	111.48	4	0	2	0	0	0	0	0	4	0	0	0	4	0	0	0	0	0	0		3.8823E4						2.116E4				3.9477E4							2	2	0	1	0	0	0	0	0
212	411	Q9FIE8|UXS3_ARATH	123.55	8	0	0	2	0	4	0	0	0	0	0	0	0	0	0	0	0	0	0			0		1.8045E4														3	2	0	0	1	0	1	0	0
212	418	Q9SN95|UXS5_ARATH	123.55	9	0	0	2	0	4	0	0	0	0	0	0	0	0	0	0	0	0	0			0		1.8045E4														3	2	0	0	1	0	1	0	0
212	440	Q9ZV36|UXS6_ARATH	123.55	8	0	0	2	0	4	0	0	0	0	0	0	0	0	0	0	0	0	0			0		1.8045E4														3	2	0	0	1	0	1	0	0
164	616	Q8L8Y0|RS21_ARATH	130.56	6	0	0	0	0	6	0	0	0	0	0	0	0	0	0	0	0	0	0					3.0298E4														2	2	0	0	0	0	5	0	0
164	784	Q93VB8|RS22_ARATH	130.56	6	0	0	0	0	6	0	0	0	0	0	0	0	0	0	0	0	0	0					3.0298E4														2	2	0	0	0	0	5	0	0
164	556	P49688|RS23_ARATH	130.56	6	0	0	0	0	6	0	0	0	0	0	0	0	0	0	0	0	0	0					3.0298E4														2	2	0	0	0	0	5	0	0
164	957	Q9SCM3|RS24_ARATH	130.56	6	0	0	0	0	6	0	0	0	0	0	0	0	0	0	0	0	0	0					3.0298E4														2	2	0	0	0	0	5	0	0
15	92	Q9FJA6|RS33_ARATH	273.44	30	0	0	5	5	26	0	0	0	0	0	0	0	0	0	0	0	5	0			3.5181E4	3.0375E4	6.7212E5												2.8947E4		9	9	0	0	2	2	13	0	0
37	171	Q93VH9|RS41_ARATH	240.15	22	0	0	4	0	19	0	0	0	0	0	0	0	0	0	13	0	0	0			0		2.1422E6										2.0957E4				5	5	0	0	1	0	26	0	0
37	169	P49204|RS42_ARATH	240.15	22	0	0	4	0	19	0	0	0	0	0	0	0	0	0	13	0	0	0			0		2.1422E6										2.0957E4				5	5	0	0	1	0	26	0	0
37	140	Q8VYK6|RS43_ARATH	240.15	22	0	0	4	0	19	0	0	0	0	0	0	0	0	0	13	0	0	0			0		2.1422E6										2.0957E4				5	5	0	0	1	0	26	0	0
233	390	Q9ZUT9|RS51_ARATH	81.19	5	0	0	5	0	0	0	0	0	0	0	0	0	0	0	0	0	0	0			1.7039E5																1	1	0	0	3	0	0	0	0
233	391	P51427|RS52_ARATH	81.19	5	0	0	5	0	0	0	0	0	0	0	0	0	0	0	0	0	0	0			1.7039E5																1	1	0	0	3	0	0	0	0
28	291	O48549|RS61_ARATH	221.72	13	0	0	0	0	13	6	0	0	0	0	0	0	0	0	4	0	0	0					1.1904E6	5.2298E3									1.1327E4				4	4	0	0	0	0	14	1	0
176	430	Q93VG5|RS81_ARATH	107.09	10	0	0	0	0	10	0	0	0	0	0	0	0	0	0	0	0	0	0					1.8325E4														2	1	0	0	0	0	3	0	0
113	314	Q9FIF3|RS82_ARATH	161.15	17	0	0	0	0	11	7	0	0	0	0	0	0	0	0	0	0	0	0					2.099E5	1.0672E4													3	2	0	0	0	0	7	1	0
104	139	Q9FLF0|RS92_ARATH	160.89	27	0	0	14	10	4	0	0	0	0	0	0	0	0	0	0	0	10	0			9.6228E5	2.5719E5	0												2.9228E5		5	5	0	0	8	4	1	0	0
39	205	Q08682|RSSA1_ARATH	215.99	20	0	0	10	10	10	0	0	0	0	0	0	0	10	0	0	0	10	0			2.716E5	2.1006E5	1.9401E5								1.7775E4				2.3488E5		4	4	0	0	4	7	4	0	0
214	1050	Q42112|RLA02_ARATH	90.97	5	0	0	0	0	2	0	0	0	0	0	0	0	0	0	0	0	0	0					1.132E4														2	2	0	0	0	0	1	0	0
35	146	Q93VT9|RL101_ARATH	203.51	21	0	0	21	18	0	0	0	0	0	0	0	0	10	0	0	0	14	0			1.0685E6	9.4902E5									2.259E4				7.1303E5		5	5	0	0	16	18	0	0	0
35	176	Q08770|RL102_ARATH	203.51	21	0	0	21	18	0	0	0	0	0	0	0	0	10	0	0	0	14	0			1.0685E6	9.4902E5									2.259E4				7.1303E5		5	5	0	0	16	18	0	0	0
35	190	Q93W22|RL103_ARATH	203.51	21	0	0	21	18	0	0	0	0	0	0	0	0	10	0	0	0	14	0			1.0685E6	9.4902E5									2.259E4				7.1303E5		5	5	0	0	16	18	0	0	0
211	335	P42795|RL111_ARATH	121.72	10	0	0	5	0	0	0	0	0	0	0	0	0	0	0	0	0	0	0			1.9732E5																2	2	0	0	3	0	0	0	0
211	341	P42794|RL112_ARATH	121.72	10	0	0	5	0	0	0	0	0	0	0	0	0	0	0	0	0	0	0			1.9732E5																2	2	0	0	3	0	0	0	0
207	729	P50883|RL121_ARATH	96.97	9	0	0	9	9	0	0	0	0	0	0	0	0	0	0	0	0	9	0			9.9457E4	1.3994E4													5.3213E4		1	1	0	0	2	2	0	0	0
207	730	Q9LFH5|RL122_ARATH	96.97	9	0	0	9	9	0	0	0	0	0	0	0	0	0	0	0	0	9	0			9.9457E4	1.3994E4													5.3213E4		1	1	0	0	2	2	0	0	0
207	727	Q9FF52|RL123_ARATH	96.97	9	0	0	9	9	0	0	0	0	0	0	0	0	0	0	0	0	9	0			9.9457E4	1.3994E4													5.3213E4		1	1	0	0	2	2	0	0	0
73	182	Q9FF90|RL133_ARATH	238.37	19	0	0	0	0	18	0	0	0	0	0	0	0	0	0	0	0	0	0					1.5719E5														8	3	0	0	0	0	13	0	0
139	1877	Q9LRX8|R13A2_ARATH	67.51	4	0	0	4	4	0	0	0	0	0	0	0	0	0	0	0	0	4	0			6.687E5	4.5492E5													4.9692E5		1	1	0	0	3	5	0	0	0
139	5446	Q9SVR0|R13A3_ARATH	67.51	4	0	0	4	4	0	0	0	0	0	0	0	0	0	0	0	0	4	0			6.687E5	4.5492E5													4.9692E5		1	1	0	0	3	5	0	0	0
139	4291	Q9FKC0|R13A4_ARATH	67.51	4	0	0	4	4	0	0	0	0	0	0	0	0	0	0	0	0	4	0			6.687E5	4.5492E5													4.9692E5		1	1	0	0	3	5	0	0	0
204	4073	Q93VI3|RL171_ARATH	93.72	5	0	0	5	0	0	0	0	0	0	0	0	0	0	0	0	0	5	0			2.7528E5														5.5785E4		1	1	0	0	3	0	0	0	0
204	2141	P51413|RL172_ARATH	93.72	5	0	0	5	0	0	0	0	0	0	0	0	0	0	0	0	0	5	0			2.7528E5														5.5785E4		1	1	0	0	3	0	0	0	0
261	444	P42791|RL182_ARATH	67.72	6	0	0	6	0	0	0	0	0	0	0	0	0	0	0	0	0	0	0			1.9573E4																1	1	0	0	1	0	0	0	0
261	433	Q940B0|RL183_ARATH	67.72	6	0	0	6	0	0	0	0	0	0	0	0	0	0	0	0	0	0	0			1.9573E4																1	1	0	0	1	0	0	0	0
191	419	P51418|R18A2_ARATH	131.47	14	0	0	10	5	0	0	0	0	0	0	0	0	0	0	0	0	0	0			9.3696E4																3	1	0	0	4	1	0	0	0
47	292	Q9SRX2|RL191_ARATH	188.09	9	0	0	9	9	0	0	0	0	0	0	0	0	0	0	0	0	8	0			1.2071E6	6.5725E5													3.2412E5		5	5	0	0	14	11	0	0	0
47	231	P49693|RL193_ARATH	188.09	10	0	0	10	10	0	0	0	0	0	0	0	0	0	0	0	0	8	0			1.2071E6	6.5725E5													3.2412E5		5	5	0	0	14	11	0	0	0
236	909	Q9FJX2|RL262_ARATH	118.71	14	0	0	13	0	0	0	0	0	0	0	0	0	0	0	0	0	0	0			7.532E4																3	3	0	0	3	0	0	0	0
271	1893	Q9LR33|R27A2_ARATH	61.27	5	0	0	5	0	0	0	0	0	0	0	0	0	0	0	0	0	0	0			5.8775E4																1	1	0	0	2	0	0	0	0
271	1892	P49637|R27A3_ARATH	61.27	5	0	0	5	0	0	0	0	0	0	0	0	0	0	0	0	0	0	0			5.8775E4																1	1	0	0	2	0	0	0	0
32	84	P17094|RL31_ARATH	276.22	17	0	15	0	0	0	0	0	10	0	0	0	15	0	0	0	2	0	0								3.0405E4											9	1	0	15	0	0	0	0	0
64	276	Q9LHP1|RL74_ARATH	184.67	12	0	0	5	5	0	0	0	0	0	0	0	0	4	0	0	0	3	0																	4.125E4		4	1	0	0	1	1	0	0	0
48	269	P49692|RL7A1_ARATH	183.77	12	0	0	0	0	12	0	0	0	0	0	0	0	0	0	0	0	0	0					1.2206E6														5	5	0	0	0	0	24	0	0
48	222	Q9LZH9|RL7A2_ARATH	183.77	12	0	0	0	0	12	0	0	0	0	0	0	0	0	0	0	0	0	0					1.2206E6														5	5	0	0	0	0	24	0	0
68	186	P46286|RL81_ARATH	196.77	16	0	0	4	4	11	0	0	0	0	0	0	0	0	0	0	0	4	0			0	1.9777E4	1.0295E6												1.8108E4		5	5	0	0	1	3	19	0	0
3	63	P0DH99|EF1A1_ARATH	325.5	29	3	18	5	7	16	0	0	6	2	0	0	26	0	0	0	13	3	6		1.1829E5			6.551E3							1.2633E5							13	2	1	26	3	4	9	0	0
3	61	Q8W4H7|EF1A2_ARATH	325.5	29	3	18	5	7	16	0	0	6	2	0	0	26	0	0	0	13	3	6		1.1829E5			6.551E3							1.2633E5							13	2	1	26	3	4	9	0	0
3	62	Q0WL56|EF1A3_ARATH	325.5	29	3	18	5	7	16	0	0	6	2	0	0	26	0	0	0	13	3	6		1.1829E5			6.551E3							1.2633E5							13	2	1	26	3	4	9	0	0
3	64	Q8GTY0|EF1A4_ARATH	325.5	29	3	18	5	7	16	0	0	6	2	0	0	26	0	0	0	13	3	6		1.1829E5			6.551E3							1.2633E5							13	2	1	26	3	4	9	0	0
1	9	Q03033|EF1A_WHEAT	380.8	44	3	31	8	7	13	0	5	6	8	0	0	38	0	0	0	13	3	10		1.6539E6	1.6031E4				4.9475E3		1.3051E4			2.0282E6						2.4024E3	17	6	1	43	4	4	8	0	1
44	138	P29546|EF1B_WHEAT	261.34	36	0	0	0	0	27	0	0	0	0	0	0	0	0	0	10	0	0	0					2.1331E6										5.5231E3				8	8	0	0	0	0	26	0	0
51	58	Q9ASR1|EF2_ARATH	239.59	13	0	0	0	0	0	5	0	0	1	0	0	4	0	0	0	0	0	7						6.5034E4			4.5097E3			1.1734E4						1.6367E5	10	10	0	0	0	0	0	10	0
4	4	P41378|IF4A_WHEAT	410.02	52	0	47	0	0	9	0	0	18	0	0	0	39	0	0	0	10	3	0		4.1448E6			7.1965E4			1.3443E5				1.8009E6				5.1551E4	2.1904E4		23	21	0	49	0	0	4	0	0
228	495	Q38884|EIF3I_ARATH	72.78	3	0	0	0	0	3	0	0	0	0	0	0	0	0	0	0	0	0	0					1.0417E5														1	1	0	0	0	0	2	0	0
187	452	Q9LTR9|NMT1_ARATH	101.51	5	0	3	0	0	0	0	0	3	0	0	0	0	0	0	0	0	0	0		5.4937E4						1.0186E4											2	2	0	2	0	0	0	0	0
274	251	P30184|AMPL1_ARATH	86.53	3	0	0	0	0	0	0	0	0	3	0	0	0	0	0	0	0	0	0									1.1224E4										1	1	0	0	0	0	0	0	0
111	76	Q940P8|TCPB_ARATH	219.73	19	0	0	0	0	0	0	0	0	2	0	0	0	2	0	0	0	0	0									3.0685E3				3.2362E3						7	7	0	0	0	0	0	0	0
114	106	O04450|TCPE_ARATH	185.26	11	0	0	0	0	10	0	0	0	0	0	0	0	0	0	0	0	0	0					2.1563E5														6	6	0	0	0	0	9	0	0
224	122	P55313|CATA2_WHEAT	130.55	4	0	0	0	0	0	0	3	0	0	0	0	0	0	0	0	0	0	0							6.1104E3												2	2	0	0	0	0	0	0	1
90	612	Q05431|APX1_ARATH	89.3	4	0	0	4	4	4	0	0	0	0	0	0	0	0	0	0	0	0	0			8.1337E4	3.9091E4	9.1506E4														1	1	0	0	1	1	1	0	0
91	422	Q1PER6|APX2_ARATH	88.19	4	0	0	4	4	4	0	0	0	0	0	0	0	4	0	0	0	0	0			5.4404E4	5.1809E4	7.3531E4								6.6132E3						1	1	0	0	1	1	2	0	0
121	217	P26759|GER3_WHEAT	158.22	23	0	0	8	0	0	0	0	0	0	0	0	0	8	0	0	0	0	0			5.8985E4										1.9572E4						4	4	0	0	2	0	0	0	0
60	125	Q9SH69|6PGD1_ARATH	188.25	11	0	11	0	0	0	0	0	0	0	0	0	7	0	0	0	4	0	0		1.1046E5										1.408E5							4	1	0	8	0	0	0	0	0
132	476	Q00917|SUS2_ARATH	118.79	2	0	0	0	0	0	0	0	0	0	2	0	0	0	0	0	0	0	0										2.7163E4									2	1	0	0	0	0	0	0	0
153	306	Q43199|APT1_WHEAT	164.59	29	0	0	13	0	0	0	0	0	0	0	0	0	0	0	0	0	5	0			6.205E4														4.2149E4		4	4	0	0	2	0	0	0	0
140	200	Q42669|ACOHC_CUCMC	165.66	6	0	0	0	0	0	2	0	0	0	0	0	0	0	0	0	0	0	6						1.003E4												1.3464E4	3	1	0	0	0	0	0	3	0
26	26	P53496|ACT11_ARATH	296.5	37	0	7	8	8	14	0	0	8	0	0	0	8	0	0	0	0	0	0					4.0796E4														12	1	0	3	5	4	8	0	0
12	32	P53497|ACT12_ARATH	303.54	37	0	7	10	11	14	0	0	8	0	0	0	10	0	0	0	0	3	3			6.4307E4	6.1514E4	1.4107E5							3.5308E4					9.1671E4	4.3147E3	12	1	0	3	8	7	9	0	0
12	31	P53494|ACT4_ARATH	303.54	37	0	7	10	11	14	0	0	8	0	0	0	10	0	0	0	0	3	3			6.4307E4	6.1514E4	1.4107E5							3.5308E4					9.1671E4	4.3147E3	12	1	0	3	8	7	9	0	0
33	37	P53492|ACT7_ARATH	287.51	38	0	7	8	8	15	0	0	8	0	0	0	8	0	0	0	0	0	4					8.1871E3													3.1514E3	12	2	0	3	5	4	8	0	0
108	312	Q9LNE4|SCRK3_ARATH	128.24	6	0	0	0	4	0	0	0	0	0	0	0	0	0	0	0	0	0	0				3.608E3															2	1	0	0	0	1	0	0	0
108	364	Q9LNE3|SCRK2_ARATH	128.24	7	0	0	0	4	0	0	0	0	0	0	0	0	0	0	0	0	0	0				3.608E3															2	1	0	0	0	1	0	0	0
252	254	Q9SV21|COPB1_ARATH	103.22	3	0	0	0	0	0	0	0	0	0	0	0	1	0	0	0	0	0	0												4.6601E4							3	3	0	0	0	0	0	0	0
252	256	Q9SV20|COPB2_ARATH	103.22	3	0	0	0	0	0	0	0	0	0	0	0	1	0	0	0	0	0	0												4.6601E4							3	3	0	0	0	0	0	0	0
122	249	O80501|RAH1B_ARATH	114.34	11	0	0	5	11	0	0	0	0	0	0	0	0	0	0	0	0	5	0				2.2233E4															2	1	0	0	5	6	0	0	0
122	289	Q9SMR4|RAH1C_ARATH	114.34	10	0	0	5	10	0	0	0	0	0	0	0	0	0	0	0	0	5	0				2.2233E4															2	1	0	0	5	6	0	0	0
310	324	Q9SR33|ORP3B_ARATH	58.49	2	0	0	0	0	0	0	0	0	0	0	0	2	0	0	0	0	0	0												5.8664E4							1	1	0	0	0	0	0	0	0
126	73	Q42560|ACO1_ARATH	197	10	0	0	0	0	0	2	0	0	0	0	0	0	0	0	0	0	0	8						3.543E4												6.7066E4	8	4	0	0	0	0	0	3	0
100	68	Q9SIB9|ACO3M_ARATH	228.68	10	0	0	0	0	0	4	0	0	0	0	0	0	0	0	0	0	0	6						5.7121E4												7.4207E4	7	2	0	0	0	0	0	5	0
62	294	P48491|TPIS_ARATH	129.02	7	0	0	7	4	0	0	0	0	0	0	0	0	7	0	0	0	4	0			7.0354E5	3.7772E5									2.4703E4				1.8493E5		2	2	0	0	8	7	0	0	0
185	180	Q9ZPS3|DCE4_ARATH	130.17	12	0	0	0	0	0	0	3	0	3	0	0	3	0	0	0	0	0	0							2.7507E3		5.6511E3			1.2886E4							4	4	0	0	0	0	0	0	1
331	1444	Q9LHT0|TRNHF_ARATH	52.96	3	0	0	0	0	3	0	0	0	0	0	0	0	0	0	0	0	0	0					1.2856E4														1	1	0	0	0	0	1	0	0
22	148	P46077|14334_ARATH	228.62	20	0	0	4	0	16	4	0	0	0	0	0	0	0	0	3	0	0	0					8.3406E5														8	1	0	0	1	0	28	1	0
43	211	P42644|14333_ARATH	211.9	20	0	0	0	0	16	0	0	0	0	0	0	0	0	0	3	0	0	0					2.4011E5														7	1	0	0	0	0	22	0	0
54	162	P25858|G3PC1_ARATH	195.26	20	0	6	9	4	11	4	0	0	0	0	0	0	4	0	0	0	4	0		9.4988E3	7.9985E4	4.8639E4	1.9864E5	1.7414E4							2.7352E3				6.3705E4		5	5	0	1	3	2	5	1	0
54	141	Q9FX54|G3PC2_ARATH	195.26	20	0	6	9	4	11	4	0	0	0	0	0	0	4	0	0	0	4	0		9.4988E3	7.9985E4	4.8639E4	1.9864E5	1.7414E4							2.7352E3				6.3705E4		5	5	0	1	3	2	5	1	0
79	25	Q9SCN8|CD48D_ARATH	271.86	20	0	0	0	0	0	7	0	0	0	0	0	0	0	0	0	0	0	14																		2.4285E4	15	1	0	0	0	0	0	8	0
81	27	Q9LZF6|CD48E_ARATH	272.62	19	0	0	0	0	0	7	0	0	0	0	0	0	0	0	0	0	0	14																		7.4405E3	15	1	0	0	0	0	0	8	0
154	220	P48347|14310_ARATH	139.02	10	0	0	0	0	6	0	0	0	0	0	0	0	0	0	0	0	0	0					4.7186E4														3	1	0	0	0	0	3	0	0
16	137	Q96300|14337_ARATH	245.19	26	0	0	5	0	22	5	0	0	0	0	0	0	0	0	3	0	0	0					9.7186E5														10	3	0	0	1	0	33	1	0
7	108	Q9FZE1|UGDH1_ARATH	262.33	18	5	16	2	2	5	5	0	7	8	2	0	10	0	0	0	7	5	5		4.5551E5						2.1202E4				3.1471E5				2.7746E3			8	3	3	17	1	2	3	2	0
8	69	Q9LIA8|UGDH2_ARATH	252.35	21	5	15	2	2	5	5	0	8	8	2	0	11	0	0	0	6	5	5		6.4711E4						7.4209E3				3.4738E3							9	4	3	12	1	2	3	2	0
180	333	P29557|IF4E1_WHEAT	136.3	12	0	0	6	6	0	0	0	0	0	0	0	0	0	0	0	0	6	0			3.6598E4	2.4081E4													2.5073E4		2	2	0	0	1	1	0	0	0
171	245	Q03389|IF4E2_WHEAT	158.92	17	0	0	0	0	11	0	0	0	0	0	0	0	0	0	0	0	0	0					8.0477E4														3	3	0	0	0	0	3	0	0
146	187	Q9FIB6|PS12A_ARATH	162.43	8	0	2	0	0	0	0	0	0	0	0	0	2	0	0	0	0	0	0		4.1626E4										1.9418E4							4	4	0	2	0	0	0	0	0
231	189	Q9SIV2|PSD2A_ARATH	132.76	4	0	0	0	0	0	0	0	0	0	0	0	0	0	0	0	0	0	2																		1.0494E3	3	3	0	0	0	0	0	0	0
89	83	Q9SEI4|PRS6B_ARATH	202.66	17	0	12	0	3	3	0	0	3	0	0	0	12	0	0	0	0	0	0		2.1383E4										8.6916E4							6	5	0	4	0	1	3	0	0
14	6	P22953|HS701_ARATH	312.12	29	0	9	7	6	11	0	0	0	0	5	0	4	0	0	0	0	0	2		0										1.5059E4							18	1	0	4	4	5	8	0	0
129	135	Q9S7C0|HSP7O_ARATH	180.05	6	0	0	0	0	0	6	0	0	0	0	0	0	0	0	0	0	0	4						4.9364E4												8.1592E4	5	5	0	0	0	0	0	4	0
129	134	F4HQD4|HSP7P_ARATH	180.05	6	0	0	0	0	0	6	0	0	0	0	0	0	0	0	0	0	0	4						4.9364E4												8.1592E4	5	5	0	0	0	0	0	4	0
21	11	O65719|HSP7C_ARATH	278.51	29	0	5	7	6	11	0	0	0	0	7	0	1	0	0	0	0	0	2										6.6303E3									15	1	0	2	4	5	8	0	0
50	348	Q8H159|UBQ10_ARATH	193.91	10	0	2	2	7	7	2	0	0	0	0	0	2	0	0	0	0	4	5		2.2729E4	5.5876E4	1.5616E5	3.956E5	1.4941E4						0					1.0916E5	3.1333E4	5	5	0	1	3	4	11	3	0
50	344	P0CH33|UBQ11_ARATH	193.91	21	0	4	4	14	14	4	0	0	0	0	0	4	0	0	0	0	8	11		2.2729E4	5.5876E4	1.5616E5	3.956E5	1.4941E4						0					1.0916E5	3.1333E4	5	5	0	1	3	4	11	3	0
50	290	Q3E7K8|UBQ12_ARATH	193.91	20	0	4	4	13	13	4	0	0	0	0	0	4	0	0	0	0	8	11		2.2729E4	5.5876E4	1.5616E5	3.956E5	1.4941E4						0					1.0916E5	3.1333E4	5	5	0	1	3	4	11	3	0
50	345	Q3E7T8|UBQ14_ARATH	193.91	15	0	3	3	10	10	3	0	0	0	0	0	3	0	0	0	0	6	8		2.2729E4	5.5876E4	1.5616E5	3.956E5	1.4941E4						0					1.0916E5	3.1333E4	5	5	0	1	3	4	11	3	0
50	346	Q1EC66|UBQ3_ARATH	193.91	15	0	3	3	10	10	3	0	0	0	0	0	3	0	0	0	0	6	8		2.2729E4	5.5876E4	1.5616E5	3.956E5	1.4941E4						0					1.0916E5	3.1333E4	5	5	0	1	3	4	11	3	0
50	347	P0CH32|UBQ4_ARATH	193.91	12	0	2	2	8	8	2	0	0	0	0	0	2	0	0	0	0	5	7		2.2729E4	5.5876E4	1.5616E5	3.956E5	1.4941E4						0					1.0916E5	3.1333E4	5	5	0	1	3	4	11	3	0
50	307	Q9FHQ6|UBQ9_ARATH	193.91	15	0	3	3	10	10	3	0	0	0	0	0	3	0	0	0	0	6	8		2.2729E4	5.5876E4	1.5616E5	3.956E5	1.4941E4						0					1.0916E5	3.1333E4	5	5	0	1	3	4	11	3	0
119	359	P30186|PSA7A_ARATH	124.92	8	0	0	0	0	8	0	0	0	0	0	0	0	0	0	0	0	0	0					3.4566E5														2	2	0	0	0	0	7	0	0
119	329	O24616|PSA7B_ARATH	124.92	8	0	0	0	0	8	0	0	0	0	0	0	0	0	0	0	0	0	0					3.4566E5														2	2	0	0	0	0	7	0	0
159	1337	Q8LD27|PSB6_ARATH	76.74	4	0	0	4	4	0	0	0	0	0	0	0	0	0	0	0	0	0	0			8.0404E4	1.3925E5															1	1	0	0	2	5	0	0	0
148	645	Q7DLS1|PSB7B_ARATH	129.77	8	0	0	5	0	0	0	0	0	0	0	0	0	0	0	0	0	0	0			4.7081E4																3	3	0	0	1	0	0	0	0
50	327	P59271|R27AA_ARATH	193.91	30	0	6	6	20	20	6	0	0	0	0	0	6	0	0	0	0	12	16		2.2729E4	5.5876E4	1.5616E5	3.956E5	1.4941E4						0					1.0916E5	3.1333E4	5	5	0	1	3	4	11	3	0
50	328	P59232|R27AB_ARATH	193.91	30	0	6	6	20	20	6	0	0	0	0	0	6	0	0	0	0	11	16		2.2729E4	5.5876E4	1.5616E5	3.956E5	1.4941E4						0					1.0916E5	3.1333E4	5	5	0	1	3	4	11	3	0
50	322	P59233|R27AC_ARATH	193.91	30	0	6	6	20	20	6	0	0	0	0	0	6	0	0	0	0	11	16		2.2729E4	5.5876E4	1.5616E5	3.956E5	1.4941E4						0					1.0916E5	3.1333E4	5	5	0	1	3	4	11	3	0
50	358	B9DHA6|RL40A_ARATH	193.91	37	0	7	7	24	24	7	0	0	0	0	0	7	0	0	0	0	14	20		2.2729E4	5.5876E4	1.5616E5	3.956E5	1.4941E4						0					1.0916E5	3.1333E4	5	5	0	1	3	4	11	3	0
50	357	Q42202|RL40B_ARATH	193.91	37	0	7	7	24	24	7	0	0	0	0	0	7	0	0	0	0	14	20		2.2729E4	5.5876E4	1.5616E5	3.956E5	1.4941E4						0					1.0916E5	3.1333E4	5	5	0	1	3	4	11	3	0
50	303	Q9SHE7|RUB1_ARATH	193.91	30	0	6	6	20	20	6	0	0	0	0	0	6	0	0	0	0	12	16		2.2729E4	5.5876E4	1.5616E5	3.956E5	1.4941E4						0					1.0916E5	3.1333E4	5	5	0	1	3	4	11	3	0
50	302	Q8RUC6|RUB2_ARATH	193.91	31	0	6	6	20	20	6	0	0	0	0	0	6	0	0	0	0	12	16		2.2729E4	5.5876E4	1.5616E5	3.956E5	1.4941E4						0					1.0916E5	3.1333E4	5	5	0	1	3	4	11	3	0
143	739	O24456|GBLPA_ARATH	97.82	3	0	0	0	0	3	0	0	0	0	0	0	0	0	0	0	0	0	0					3.2154E4														1	1	0	0	0	0	1	0	0
143	451	Q9C4Z6|GPLPB_ARATH	97.82	3	0	0	0	0	3	0	0	0	0	0	0	0	0	0	0	0	0	0					3.2154E4														1	1	0	0	0	0	1	0	0
143	604	Q9LV28|GPLPC_ARATH	97.82	3	0	0	0	0	3	0	0	0	0	0	0	0	0	0	0	0	0	0					3.2154E4														1	1	0	0	0	0	1	0	0
97	107	Q6W8Q2|REHY_WHEAT	195.59	27	0	0	14	23	0	0	0	0	0	0	0	0	5	0	0	0	5	0			2.1047E5	1.5449E5									1.4741E3				1.904E4		7	7	0	0	4	6	0	0	0
87	113	P25696|ENO2_ARATH	206.51	22	15	2	0	0	0	0	5	0	5	0	0	8	0	0	0	0	0	0	1.772E5	1.9311E4					2.1356E3		8.87E4			6.4245E4							7	7	7	1	0	0	0	0	1
251	218	Q9LNU4|PSD3A_ARATH	97.77	5	0	0	0	0	0	0	2	0	0	0	0	1	0	0	0	0	0	0							7.1175E3					3.3234E3							3	3	0	0	0	0	0	0	1
160	85	Q03387|IF4G1_WHEAT	179.4	7	0	0	0	0	0	0	0	1	0	0	0	0	0	0	0	0	1	0								0									2.4349E4		6	6	0	0	0	0	0	0	0
219	586	O04487|EF1G1_ARATH	75.59	2	0	2	2	2	0	0	0	0	0	0	0	0	0	0	0	0	0	0		2.2367E4	4.3625E5	3.2389E5															1	1	0	1	1	1	0	0	0
49	116	Q9FWA3|6PGD2_ARATH	224.71	12	0	12	0	0	0	0	0	0	0	0	0	8	0	0	0	6	0	0		8.8969E5										7.8688E5				1.986E3			6	3	0	18	0	0	0	0	0
108	283	Q9SID0|SCRK1_ARATH	128.24	7	0	0	0	4	0	0	0	0	0	0	0	0	0	0	0	0	0	0				3.608E3															2	1	0	0	0	1	0	0	0
150	253	P49040|SUS1_ARATH	144.98	4	0	0	0	0	0	0	0	0	0	3	0	0	0	0	0	0	0	0										4.7356E3									4	3	0	0	0	0	0	0	0
88	366	Q9LHG9|NACA1_ARATH	176.82	15	0	0	15	15	15	0	0	0	0	0	0	0	7	0	0	0	7	0			1.1246E5	6.2883E4	1.337E5								4.7221E3				4.3696E4		2	2	0	0	3	4	3	0	0
243	874	O24653|GDI2_ARATH	83.63	2	0	0	0	0	0	0	0	0	0	0	0	2	0	0	0	0	0	0												1.4197E5							1	1	0	0	0	0	0	0	0
88	363	Q6ICZ8|NACA3_ARATH	176.82	15	0	0	15	15	15	0	0	0	0	0	0	0	7	0	0	0	7	0			1.1246E5	6.2883E4	1.337E5								4.7221E3				4.3696E4		2	2	0	0	3	4	3	0	0
219	1083	Q9FVT2|EF1G2_ARATH	75.59	2	0	2	2	2	0	0	0	0	0	0	0	0	0	0	0	0	0	0		2.2367E4	4.3625E5	3.2389E5															1	1	0	1	1	1	0	0	0
5	8	P32112|SAHH_WHEAT	353.76	45	31	7	0	0	6	0	11	0	13	0	0	12	0	0	0	0	0	0	1.021E6	1.0882E5			2.8913E4		8.0249E4		2.1745E5			2.9424E5							22	22	54	4	0	0	3	0	5
Cytoskeleton
Protein Group	Protein ID	Accession	-10lgP	Coverage (%)	Coverage (%)																		Area																				#Spec
					Control-1	Control-2	Control-3	Control-4	Control-5	Control-6	Control-7	Control-8	Control-9	Control-10	Control-11	Control-12	Control-13	Control-14	Control-15	Control-16	Control-17	Control-18	Control-1	Control-2	Control-3	Control-4	Control-5	Control-6	Control-7	Control-8	Control-9	Control-10	Control-11	Control-12	Control-13	Control-14	Control-15	Control-16	Control-17	Control-18	#Peptides	#Unique	Control-1	Control-2	Control-3	Control-4	Control-5	Control-6	Control-7
26	26	P53496|ACT11_ARATH	296.5	37	0	7	8	8	14	0	0	8	0	0	0	8	0	0	0	0	0	0					4.0796E4														12	1	0	3	5	4	8	0	0
12	32	P53497|ACT12_ARATH	303.54	37	0	7	10	11	14	0	0	8	0	0	0	10	0	0	0	0	3	3			6.4307E4	6.1514E4	1.4107E5							3.5308E4					9.1671E4	4.3147E3	12	1	0	3	8	7	9	0	0
12	31	P53494|ACT4_ARATH	303.54	37	0	7	10	11	14	0	0	8	0	0	0	10	0	0	0	0	3	3			6.4307E4	6.1514E4	1.4107E5							3.5308E4					9.1671E4	4.3147E3	12	1	0	3	8	7	9	0	0
33	37	P53492|ACT7_ARATH	287.51	38	0	7	8	8	15	0	0	8	0	0	0	8	0	0	0	0	0	4					8.1871E3													3.1514E3	12	2	0	3	5	4	8	0	0
Endoplasmic reticulum
Protein Group	Protein ID	Accession	-10lgP	Coverage (%)	Coverage (%)																		Area																				#Spec
					Control-1	Control-2	Control-3	Control-4	Control-5	Control-6	Control-7	Control-8	Control-9	Control-10	Control-11	Control-12	Control-13	Control-14	Control-15	Control-16	Control-17	Control-18	Control-1	Control-2	Control-3	Control-4	Control-5	Control-6	Control-7	Control-8	Control-9	Control-10	Control-11	Control-12	Control-13	Control-14	Control-15	Control-16	Control-17	Control-18	#Peptides	#Unique	Control-1	Control-2	Control-3	Control-4	Control-5	Control-6	Control-7
189	1247	Q38858|CALR2_ARATH	117.89	7	0	2	0	0	0	0	5	0	0	0	0	2	0	0	0	0	0	0		1.0123E5					2.302E3					1.0763E5							3	3	0	2	0	0	0	0	1
264	271	Q2QMN7|UAH_ORYSJ	100.23	2	0	0	0	0	0	0	0	0	0	0	0	2	0	0	0	0	0	0												1.5105E4							1	1	0	0	0	0	0	0	0
202	295	O04834|SAR1A_ARATH	134.57	13	0	0	0	6	0	0	0	0	0	0	0	0	0	0	0	0	6	0				4.6519E4													3.2888E4		2	2	0	0	0	1	0	0	0
310	424	Q9LZM1|ORP3A_ARATH	58.49	2	0	0	0	0	0	0	0	0	0	0	0	2	0	0	0	0	0	0												5.8664E4							1	1	0	0	0	0	0	0	0
52	49	Q39043|BIP2_ARATH	252.01	14	0	2	3	0	4	0	0	0	0	3	0	0	0	0	0	0	0	0					6.5622E3														11	9	0	1	1	0	2	0	0
Endosome
Protein Group	Protein ID	Accession	-10lgP	Coverage (%)	Coverage (%)																		Area																				#Spec
					Control-1	Control-2	Control-3	Control-4	Control-5	Control-6	Control-7	Control-8	Control-9	Control-10	Control-11	Control-12	Control-13	Control-14	Control-15	Control-16	Control-17	Control-18	Control-1	Control-2	Control-3	Control-4	Control-5	Control-6	Control-7	Control-8	Control-9	Control-10	Control-11	Control-12	Control-13	Control-14	Control-15	Control-16	Control-17	Control-18	#Peptides	#Unique	Control-1	Control-2	Control-3	Control-4	Control-5	Control-6	Control-7
199	227	P36397|ARF1_ARATH	149	20	0	0	20	0	0	0	0	0	0	0	0	0	0	0	0	0	0	0			9.2854E4																3	3	0	0	3	0	0	0	0
Extracellular
Protein Group	Protein ID	Accession	-10lgP	Coverage (%)	Coverage (%)																		Area																				#Spec
					Control-1	Control-2	Control-3	Control-4	Control-5	Control-6	Control-7	Control-8	Control-9	Control-10	Control-11	Control-12	Control-13	Control-14	Control-15	Control-16	Control-17	Control-18	Control-1	Control-2	Control-3	Control-4	Control-5	Control-6	Control-7	Control-8	Control-9	Control-10	Control-11	Control-12	Control-13	Control-14	Control-15	Control-16	Control-17	Control-18	#Peptides	#Unique	Control-1	Control-2	Control-3	Control-4	Control-5	Control-6	Control-7
108	312	Q9LNE4|SCRK3_ARATH	128.24	6	0	0	0	4	0	0	0	0	0	0	0	0	0	0	0	0	0	0				3.608E3															2	1	0	0	0	1	0	0	0
108	364	Q9LNE3|SCRK2_ARATH	128.24	7	0	0	0	4	0	0	0	0	0	0	0	0	0	0	0	0	0	0				3.608E3															2	1	0	0	0	1	0	0	0
Golgi apparatus
Protein Group	Protein ID	Accession	-10lgP	Coverage (%)	Coverage (%)																		Area																				#Spec
					Control-1	Control-2	Control-3	Control-4	Control-5	Control-6	Control-7	Control-8	Control-9	Control-10	Control-11	Control-12	Control-13	Control-14	Control-15	Control-16	Control-17	Control-18	Control-1	Control-2	Control-3	Control-4	Control-5	Control-6	Control-7	Control-8	Control-9	Control-10	Control-11	Control-12	Control-13	Control-14	Control-15	Control-16	Control-17	Control-18	#Peptides	#Unique	Control-1	Control-2	Control-3	Control-4	Control-5	Control-6	Control-7
252	254	Q9SV21|COPB1_ARATH	103.22	3	0	0	0	0	0	0	0	0	0	0	0	1	0	0	0	0	0	0												4.6601E4							3	3	0	0	0	0	0	0	0
252	256	Q9SV20|COPB2_ARATH	103.22	3	0	0	0	0	0	0	0	0	0	0	0	1	0	0	0	0	0	0												4.6601E4							3	3	0	0	0	0	0	0	0
122	249	O80501|RAH1B_ARATH	114.34	11	0	0	5	11	0	0	0	0	0	0	0	0	0	0	0	0	5	0				2.2233E4															2	1	0	0	5	6	0	0	0
122	289	Q9SMR4|RAH1C_ARATH	114.34	10	0	0	5	10	0	0	0	0	0	0	0	0	0	0	0	0	5	0				2.2233E4															2	1	0	0	5	6	0	0	0
88	363	Q6ICZ8|NACA3_ARATH	176.82	15	0	0	15	15	15	0	0	0	0	0	0	0	7	0	0	0	7	0			1.1246E5	6.2883E4	1.337E5								4.7221E3				4.3696E4		2	2	0	0	3	4	3	0	0
199	227	P36397|ARF1_ARATH	149	20	0	0	20	0	0	0	0	0	0	0	0	0	0	0	0	0	0	0			9.2854E4																3	3	0	0	3	0	0	0	0
199	225	Q9LQC8|ARF2A_ARATH	149	20	0	0	20	0	0	0	0	0	0	0	0	0	0	0	0	0	0	0			9.2854E4																3	3	0	0	3	0	0	0	0
199	224	P0DH91|ARF2B_ARATH	149	20	0	0	20	0	0	0	0	0	0	0	0	0	0	0	0	0	0	0			9.2854E4																3	3	0	0	3	0	0	0	0
263	1222	O22715|AP1M2_ARATH	74	2	0	2	0	0	0	0	0	0	0	0	0	2	0	0	0	0	0	0		1.5964E4										0							1	1	0	1	0	0	0	0	0
63	181	Q9LNW1|RAA2B_ARATH	193.3	22	0	0	18	14	10	0	0	0	0	0	0	0	0	0	0	0	19	0			1.5893E4																5	1	0	0	8	9	2	0	0
63	163	Q96283|RAA2C_ARATH	193.3	22	0	0	18	13	10	0	0	0	0	0	0	0	0	0	0	0	18	0			1.5893E4																5	1	0	0	8	9	2	0	0
122	270	Q9SID8|RAH1D_ARATH	114.34	11	0	0	5	11	0	0	0	0	0	0	0	0	0	0	0	0	5	0				2.2233E4															2	1	0	0	5	6	0	0	0
122	226	Q9LFT9|RAH1E_ARATH	114.34	11	0	0	5	11	0	0	0	0	0	0	0	0	0	0	0	0	5	0				2.2233E4															2	1	0	0	5	6	0	0	0
202	295	O04834|SAR1A_ARATH	134.57	13	0	0	0	6	0	0	0	0	0	0	0	0	0	0	0	0	6	0				4.6519E4													3.2888E4		2	2	0	0	0	1	0	0	0
310	424	Q9LZM1|ORP3A_ARATH	58.49	2	0	0	0	0	0	0	0	0	0	0	0	2	0	0	0	0	0	0												5.8664E4							1	1	0	0	0	0	0	0	0
74	109	P28186|RAE1C_ARATH	189.15	25	0	0	21	19	0	0	0	0	0	0	0	0	5	0	0	0	19	0			2.0149E5	1.0638E5													1.5392E5		5	3	0	0	9	10	0	0	0
74	179	Q9LZD4|RAE1D_ARATH	189.15	25	0	0	21	19	0	0	0	0	0	0	0	0	5	0	0	0	19	0			2.0149E5	1.0638E5													1.5392E5		5	3	0	0	9	10	0	0	0
Membrane
Protein Group	Protein ID	Accession	-10lgP	Coverage (%)	Coverage (%)																		Area																				#Spec
					Control-1	Control-2	Control-3	Control-4	Control-5	Control-6	Control-7	Control-8	Control-9	Control-10	Control-11	Control-12	Control-13	Control-14	Control-15	Control-16	Control-17	Control-18	Control-1	Control-2	Control-3	Control-4	Control-5	Control-6	Control-7	Control-8	Control-9	Control-10	Control-11	Control-12	Control-13	Control-14	Control-15	Control-16	Control-17	Control-18	#Peptides	#Unique	Control-1	Control-2	Control-3	Control-4	Control-5	Control-6	Control-7
116	627	Q42564|APX3_ARATH	91.83	3	0	0	0	0	3	0	0	0	0	0	0	0	0	0	0	0	0	0					1.0263E5														1	1	0	0	0	0	3	0	0
116	1633	Q7XZP5|APX5_ARATH	91.83	3	0	0	0	0	3	0	0	0	0	0	0	0	0	0	0	0	0	0					1.0263E5														1	1	0	0	0	0	3	0	0
184	133	P93596|CP51_WHEAT	145.7	12	0	0	0	0	0	0	0	0	3	0	0	6	0	0	0	0	0	0									1.4449E4			1.3407E4							5	5	0	0	0	0	0	0	0
155	144	Q9LS94|RAG3F_ARATH	138.85	19	0	0	5	5	0	0	0	0	0	0	0	0	0	0	0	0	11	0			6.478E4	0													5.5528E4		4	3	0	0	1	1	0	0	0
Mitochondrion
Protein Group	Protein ID	Accession	-10lgP	Coverage (%)	Coverage (%)																		Area																				#Spec
					Control-1	Control-2	Control-3	Control-4	Control-5	Control-6	Control-7	Control-8	Control-9	Control-10	Control-11	Control-12	Control-13	Control-14	Control-15	Control-16	Control-17	Control-18	Control-1	Control-2	Control-3	Control-4	Control-5	Control-6	Control-7	Control-8	Control-9	Control-10	Control-11	Control-12	Control-13	Control-14	Control-15	Control-16	Control-17	Control-18	#Peptides	#Unique	Control-1	Control-2	Control-3	Control-4	Control-5	Control-6	Control-7
140	200	Q42669|ACOHC_CUCMC	165.66	6	0	0	0	0	0	2	0	0	0	0	0	0	0	0	0	0	0	6						1.003E4												1.3464E4	3	1	0	0	0	0	0	3	0
126	73	Q42560|ACO1_ARATH	197	10	0	0	0	0	0	2	0	0	0	0	0	0	0	0	0	0	0	8						3.543E4												6.7066E4	8	4	0	0	0	0	0	3	0
100	68	Q9SIB9|ACO3M_ARATH	228.68	10	0	0	0	0	0	4	0	0	0	0	0	0	0	0	0	0	0	6						5.7121E4												7.4207E4	7	2	0	0	0	0	0	5	0
62	294	P48491|TPIS_ARATH	129.02	7	0	0	7	4	0	0	0	0	0	0	0	0	7	0	0	0	4	0			7.0354E5	3.7772E5									2.4703E4				1.8493E5		2	2	0	0	8	7	0	0	0
185	180	Q9ZPS3|DCE4_ARATH	130.17	12	0	0	0	0	0	0	3	0	3	0	0	3	0	0	0	0	0	0							2.7507E3		5.6511E3			1.2886E4							4	4	0	0	0	0	0	0	1
331	1444	Q9LHT0|TRNHF_ARATH	52.96	3	0	0	0	0	3	0	0	0	0	0	0	0	0	0	0	0	0	0					1.2856E4														1	1	0	0	0	0	1	0	0
87	113	P25696|ENO2_ARATH	206.51	22	15	2	0	0	0	0	5	0	5	0	0	8	0	0	0	0	0	0	1.772E5	1.9311E4					2.1356E3		8.87E4			6.4245E4							7	7	7	1	0	0	0	0	1
196	265	Q9LDV4|ALAT2_ARATH	150.48	6	2	2	0	0	2	0	0	0	0	0	0	2	0	0	0	0	0	0	0	1.0967E5			4.2422E3							0							3	3	1	1	0	0	1	0	0
246	136	Q94C74|GLYM2_ARATH	113.15	4	0	0	0	0	0	0	0	0	0	0	0	2	0	0	0	0	0	0												3.192E4							2	2	0	0	0	0	0	0	0
304	553	Q94A28|ACO2M_ARATH	52.45	1	0	0	0	0	0	0	0	0	0	0	0	0	0	0	0	0	0	0																			1	1	0	0	0	0	0	0	0
203	3174	Q94AL9|AGT22_ARATH	67.46	2	0	2	0	0	0	0	0	0	0	0	0	2	0	0	0	0	0	0		9.5146E4										4.0793E4							1	1	0	1	0	0	0	0	0
136	167	Q9M1D3|CISY5_ARATH	186.05	12	0	3	0	0	0	0	0	0	0	0	0	0	0	0	0	0	0	0		1.0175E4																	5	4	0	1	0	0	0	0	0
245	839	Q9FLQ4|ODO2A_ARATH	58.05	2	0	2	0	0	0	0	0	2	0	0	0	0	0	0	0	0	0	0		7.8333E4						6.7371E3											1	1	0	1	0	0	0	0	0
245	479	Q8H107|ODO2B_ARATH	58.05	2	0	2	0	0	0	0	0	2	0	0	0	0	0	0	0	0	0	0		7.8333E4						6.7371E3											1	1	0	1	0	0	0	0	0
168	213	P93033|FUM1_ARATH	145.56	5	0	5	0	0	0	0	0	0	0	0	0	5	0	0	0	0	0	0		0										1.4733E5							2	1	0	3	0	0	0	0	0
205	191	P68538|MI25_WHEAT	100.64	11	0	0	7	11	0	0	0	0	0	0	0	0	0	0	0	0	0	0			6.0665E4	4.2623E4															2	2	0	0	1	3	0	0	0
67	66	P92549|ATPAM_ARATH	218.9	17	8	0	0	2	2	0	3	0	5	0	0	2	0	0	0	0	2	0	3.277E4																		8	1	12	0	0	2	1	0	1
29	7	P12862|ATPAM_WHEAT	304.66	41	23	0	0	5	2	0	9	0	21	0	0	2	0	0	0	0	5	0	2.8028E5			1.8025E4			1.0179E4		8.9563E4								1.7933E4		17	10	21	0	0	3	1	0	4
58	42	P83483|ATPBM_ARATH	254.58	24	17	0	0	0	3	0	8	0	17	0	0	0	0	0	0	0	0	0	4.1558E5				0		5.479E4		2.3784E5										10	10	10	0	0	0	1	0	5
58	43	P83484|ATPBN_ARATH	254.58	24	17	0	0	0	3	0	8	0	17	0	0	0	0	0	0	0	0	0	4.1558E5				0		5.479E4		2.3784E5										10	10	10	0	0	0	1	0	5
58	47	Q9C5A9|ATPBO_ARATH	254.58	24	17	0	0	0	3	0	8	0	17	0	0	0	0	0	0	0	0	0	4.1558E5				0		5.479E4		2.3784E5										10	10	10	0	0	0	1	0	5
256	2798	P07747|CYB_WHEAT	73.55	2	0	0	0	0	2	0	0	0	0	0	0	0	0	0	0	0	0	0					2.4836E4														1	1	0	0	0	0	1	0	0
215	2791	P00413|COX2_WHEAT	88.3	7	0	0	0	0	3	0	0	0	0	0	0	0	0	0	0	0	0	0					1.4078E5														2	2	0	0	0	0	2	0	0
152	395	Q95748|NDUS3_ARATH	126.96	12	0	0	5	12	0	0	0	0	0	0	0	0	0	0	0	0	7	0			9.191E4	1.4735E5													8.4386E4		2	2	0	0	1	5	0	0	0
259	340	Q94B78|GCSP1_ARATH	83.41	1	0	0	0	0	0	1	0	0	0	0	0	0	0	0	0	0	0	0						1.8174E4													1	1	0	0	0	0	0	1	0
34	86	P31167|ADT1_ARATH	261.82	23	0	0	0	0	19	0	0	0	0	0	0	0	0	0	3	0	0	0					6.5425E4										0				11	2	0	0	0	0	35	0	0
24	55	Q41629|ADT1_WHEAT	296.74	39	0	0	0	0	31	0	0	0	0	0	0	0	0	0	0	0	0	0					6.531E5														15	6	0	0	0	0	41	0	0
94	94	P46274|VDAC1_WHEAT	221.35	28	0	0	0	0	19	0	0	0	0	0	0	0	0	0	4	0	0	0					1.8776E5										1.7684E3				7	7	0	0	0	0	6	0	0
208	911	Q9FJX3|VDAC2_ARATH	83.05	4	0	0	0	0	4	0	0	0	0	0	0	0	0	0	0	0	0	0					3.1752E4														1	1	0	0	0	0	1	0	0
201	420	Q9M2Z8|MPCP2_ARATH	102.96	5	0	0	0	0	2	0	0	0	0	0	0	0	0	0	0	0	0	0					2.1619E4														2	2	0	0	0	0	1	0	0
Nucleus
Protein Group	Protein ID	Accession	-10lgP	Coverage (%)	Coverage (%)																		Area																				#Spec
					Control-1	Control-2	Control-3	Control-4	Control-5	Control-6	Control-7	Control-8	Control-9	Control-10	Control-11	Control-12	Control-13	Control-14	Control-15	Control-16	Control-17	Control-18	Control-1	Control-2	Control-3	Control-4	Control-5	Control-6	Control-7	Control-8	Control-9	Control-10	Control-11	Control-12	Control-13	Control-14	Control-15	Control-16	Control-17	Control-18	#Peptides	#Unique	Control-1	Control-2	Control-3	Control-4	Control-5	Control-6	Control-7
366	3605	O65041|UBA3_ARATH	54.47	2	0	2	0	0	0	0	0	0	0	0	0	0	0	0	0	0	0	0		4.0702E4																	1	1	0	1	0	0	0	0	0
156	229	Q9LQQ4|H2B1_ARATH	145.72	20	0	0	14	7	7	0	0	0	0	0	0	0	0	0	0	0	0	0			1.2959E5	2.5204E4	9.5293E3														3	3	0	0	2	1	1	0	0
156	223	P27807|H2B1_WHEAT	145.72	20	0	0	14	7	7	0	0	0	0	0	0	0	0	0	0	0	0	0			1.2959E5	2.5204E4	9.5293E3														3	3	0	0	2	1	1	0	0
156	296	Q9FFC0|H2B10_ARATH	145.72	21	0	0	14	8	7	0	0	0	0	0	0	0	0	0	0	0	0	0			1.2959E5	2.5204E4	9.5293E3														3	3	0	0	2	1	1	0	0
156	300	P40283|H2B11_ARATH	145.72	20	0	0	14	7	7	0	0	0	0	0	0	0	0	0	0	0	0	0			1.2959E5	2.5204E4	9.5293E3														3	3	0	0	2	1	1	0	0
156	203	P05621|H2B2_WHEAT	145.72	20	0	0	14	7	7	0	0	0	0	0	0	0	0	0	0	0	0	0			1.2959E5	2.5204E4	9.5293E3														3	3	0	0	2	1	1	0	0
156	278	Q9SI96|H2B3_ARATH	145.72	20	0	0	14	7	7	0	0	0	0	0	0	0	0	0	0	0	0	0			1.2959E5	2.5204E4	9.5293E3														3	3	0	0	2	1	1	0	0
156	240	Q43217|H2B3_WHEAT	145.72	22	0	0	15	8	7	0	0	0	0	0	0	0	0	0	0	0	0	0			1.2959E5	2.5204E4	9.5293E3														3	3	0	0	2	1	1	0	0
156	284	Q43215|H2B4_WHEAT	145.72	22	0	0	16	8	7	0	0	0	0	0	0	0	0	0	0	0	0	0			1.2959E5	2.5204E4	9.5293E3														3	3	0	0	2	1	1	0	0
156	196	Q43216|H2B5_WHEAT	145.72	22	0	0	15	8	7	0	0	0	0	0	0	0	0	0	0	0	0	0			1.2959E5	2.5204E4	9.5293E3														3	3	0	0	2	1	1	0	0
156	313	O23629|H2B6_ARATH	145.72	20	0	0	14	7	7	0	0	0	0	0	0	0	0	0	0	0	0	0			1.2959E5	2.5204E4	9.5293E3														3	3	0	0	2	1	1	0	0
156	273	Q9LZT0|H2B7_ARATH	145.72	21	0	0	14	8	7	0	0	0	0	0	0	0	0	0	0	0	0	0			1.2959E5	2.5204E4	9.5293E3														3	3	0	0	2	1	1	0	0
102	297	P59259|H4_ARATH	139.66	31	0	12	19	19	21	0	0	0	0	0	0	12	0	0	0	0	21	0		9.5829E3	3.0221E5	5.3423E4	1.8769E4							8.1699E3					7.8043E4		3	3	0	1	3	3	2	0	0
102	298	P62785|H41_WHEAT	139.66	31	0	12	19	19	21	0	0	0	0	0	0	12	0	0	0	0	21	0		9.5829E3	3.0221E5	5.3423E4	1.8769E4							8.1699E3					7.8043E4		3	3	0	1	3	3	2	0	0
102	293	P62786|H42_WHEAT	139.66	31	0	12	19	19	21	0	0	0	0	0	0	12	0	0	0	0	21	0		9.5829E3	3.0221E5	5.3423E4	1.8769E4							8.1699E3					7.8043E4		3	3	0	1	3	3	2	0	0
22	148	P46077|14334_ARATH	228.62	20	0	0	4	0	16	4	0	0	0	0	0	0	0	0	3	0	0	0					8.3406E5														8	1	0	0	1	0	28	1	0
43	211	P42644|14333_ARATH	211.9	20	0	0	0	0	16	0	0	0	0	0	0	0	0	0	3	0	0	0					2.4011E5														7	1	0	0	0	0	22	0	0
54	162	P25858|G3PC1_ARATH	195.26	20	0	6	9	4	11	4	0	0	0	0	0	0	4	0	0	0	4	0		9.4988E3	7.9985E4	4.8639E4	1.9864E5	1.7414E4							2.7352E3				6.3705E4		5	5	0	1	3	2	5	1	0
54	141	Q9FX54|G3PC2_ARATH	195.26	20	0	6	9	4	11	4	0	0	0	0	0	0	4	0	0	0	4	0		9.4988E3	7.9985E4	4.8639E4	1.9864E5	1.7414E4							2.7352E3				6.3705E4		5	5	0	1	3	2	5	1	0
79	25	Q9SCN8|CD48D_ARATH	271.86	20	0	0	0	0	0	7	0	0	0	0	0	0	0	0	0	0	0	14																		2.4285E4	15	1	0	0	0	0	0	8	0
81	27	Q9LZF6|CD48E_ARATH	272.62	19	0	0	0	0	0	7	0	0	0	0	0	0	0	0	0	0	0	14																		7.4405E3	15	1	0	0	0	0	0	8	0
154	220	P48347|14310_ARATH	139.02	10	0	0	0	0	6	0	0	0	0	0	0	0	0	0	0	0	0	0					4.7186E4														3	1	0	0	0	0	3	0	0
16	137	Q96300|14337_ARATH	245.19	26	0	0	5	0	22	5	0	0	0	0	0	0	0	0	3	0	0	0					9.7186E5														10	3	0	0	1	0	33	1	0
7	108	Q9FZE1|UGDH1_ARATH	262.33	18	5	16	2	2	5	5	0	7	8	2	0	10	0	0	0	7	5	5		4.5551E5						2.1202E4				3.1471E5				2.7746E3			8	3	3	17	1	2	3	2	0
8	69	Q9LIA8|UGDH2_ARATH	252.35	21	5	15	2	2	5	5	0	8	8	2	0	11	0	0	0	6	5	5		6.4711E4						7.4209E3				3.4738E3							9	4	3	12	1	2	3	2	0
180	333	P29557|IF4E1_WHEAT	136.3	12	0	0	6	6	0	0	0	0	0	0	0	0	0	0	0	0	6	0			3.6598E4	2.4081E4													2.5073E4		2	2	0	0	1	1	0	0	0
171	245	Q03389|IF4E2_WHEAT	158.92	17	0	0	0	0	11	0	0	0	0	0	0	0	0	0	0	0	0	0					8.0477E4														3	3	0	0	0	0	3	0	0
146	187	Q9FIB6|PS12A_ARATH	162.43	8	0	2	0	0	0	0	0	0	0	0	0	2	0	0	0	0	0	0		4.1626E4										1.9418E4							4	4	0	2	0	0	0	0	0
231	189	Q9SIV2|PSD2A_ARATH	132.76	4	0	0	0	0	0	0	0	0	0	0	0	0	0	0	0	0	0	2																		1.0494E3	3	3	0	0	0	0	0	0	0
89	83	Q9SEI4|PRS6B_ARATH	202.66	17	0	12	0	3	3	0	0	3	0	0	0	12	0	0	0	0	0	0		2.1383E4										8.6916E4							6	5	0	4	0	1	3	0	0
14	6	P22953|HS701_ARATH	312.12	29	0	9	7	6	11	0	0	0	0	5	0	4	0	0	0	0	0	2		0										1.5059E4							18	1	0	4	4	5	8	0	0
129	135	Q9S7C0|HSP7O_ARATH	180.05	6	0	0	0	0	0	6	0	0	0	0	0	0	0	0	0	0	0	4						4.9364E4												8.1592E4	5	5	0	0	0	0	0	4	0
129	134	F4HQD4|HSP7P_ARATH	180.05	6	0	0	0	0	0	6	0	0	0	0	0	0	0	0	0	0	0	4						4.9364E4												8.1592E4	5	5	0	0	0	0	0	4	0
21	11	O65719|HSP7C_ARATH	278.51	29	0	5	7	6	11	0	0	0	0	7	0	1	0	0	0	0	0	2										6.6303E3									15	1	0	2	4	5	8	0	0
50	348	Q8H159|UBQ10_ARATH	193.91	10	0	2	2	7	7	2	0	0	0	0	0	2	0	0	0	0	4	5		2.2729E4	5.5876E4	1.5616E5	3.956E5	1.4941E4						0					1.0916E5	3.1333E4	5	5	0	1	3	4	11	3	0
50	344	P0CH33|UBQ11_ARATH	193.91	21	0	4	4	14	14	4	0	0	0	0	0	4	0	0	0	0	8	11		2.2729E4	5.5876E4	1.5616E5	3.956E5	1.4941E4						0					1.0916E5	3.1333E4	5	5	0	1	3	4	11	3	0
50	290	Q3E7K8|UBQ12_ARATH	193.91	20	0	4	4	13	13	4	0	0	0	0	0	4	0	0	0	0	8	11		2.2729E4	5.5876E4	1.5616E5	3.956E5	1.4941E4						0					1.0916E5	3.1333E4	5	5	0	1	3	4	11	3	0
50	345	Q3E7T8|UBQ14_ARATH	193.91	15	0	3	3	10	10	3	0	0	0	0	0	3	0	0	0	0	6	8		2.2729E4	5.5876E4	1.5616E5	3.956E5	1.4941E4						0					1.0916E5	3.1333E4	5	5	0	1	3	4	11	3	0
50	346	Q1EC66|UBQ3_ARATH	193.91	15	0	3	3	10	10	3	0	0	0	0	0	3	0	0	0	0	6	8		2.2729E4	5.5876E4	1.5616E5	3.956E5	1.4941E4						0					1.0916E5	3.1333E4	5	5	0	1	3	4	11	3	0
50	347	P0CH32|UBQ4_ARATH	193.91	12	0	2	2	8	8	2	0	0	0	0	0	2	0	0	0	0	5	7		2.2729E4	5.5876E4	1.5616E5	3.956E5	1.4941E4						0					1.0916E5	3.1333E4	5	5	0	1	3	4	11	3	0
50	307	Q9FHQ6|UBQ9_ARATH	193.91	15	0	3	3	10	10	3	0	0	0	0	0	3	0	0	0	0	6	8		2.2729E4	5.5876E4	1.5616E5	3.956E5	1.4941E4						0					1.0916E5	3.1333E4	5	5	0	1	3	4	11	3	0
119	359	P30186|PSA7A_ARATH	124.92	8	0	0	0	0	8	0	0	0	0	0	0	0	0	0	0	0	0	0					3.4566E5														2	2	0	0	0	0	7	0	0
119	329	O24616|PSA7B_ARATH	124.92	8	0	0	0	0	8	0	0	0	0	0	0	0	0	0	0	0	0	0					3.4566E5														2	2	0	0	0	0	7	0	0
159	1337	Q8LD27|PSB6_ARATH	76.74	4	0	0	4	4	0	0	0	0	0	0	0	0	0	0	0	0	0	0			8.0404E4	1.3925E5															1	1	0	0	2	5	0	0	0
148	645	Q7DLS1|PSB7B_ARATH	129.77	8	0	0	5	0	0	0	0	0	0	0	0	0	0	0	0	0	0	0			4.7081E4																3	3	0	0	1	0	0	0	0
50	327	P59271|R27AA_ARATH	193.91	30	0	6	6	20	20	6	0	0	0	0	0	6	0	0	0	0	12	16		2.2729E4	5.5876E4	1.5616E5	3.956E5	1.4941E4						0					1.0916E5	3.1333E4	5	5	0	1	3	4	11	3	0
50	328	P59232|R27AB_ARATH	193.91	30	0	6	6	20	20	6	0	0	0	0	0	6	0	0	0	0	11	16		2.2729E4	5.5876E4	1.5616E5	3.956E5	1.4941E4						0					1.0916E5	3.1333E4	5	5	0	1	3	4	11	3	0
50	322	P59233|R27AC_ARATH	193.91	30	0	6	6	20	20	6	0	0	0	0	0	6	0	0	0	0	11	16		2.2729E4	5.5876E4	1.5616E5	3.956E5	1.4941E4						0					1.0916E5	3.1333E4	5	5	0	1	3	4	11	3	0
50	358	B9DHA6|RL40A_ARATH	193.91	37	0	7	7	24	24	7	0	0	0	0	0	7	0	0	0	0	14	20		2.2729E4	5.5876E4	1.5616E5	3.956E5	1.4941E4						0					1.0916E5	3.1333E4	5	5	0	1	3	4	11	3	0
50	357	Q42202|RL40B_ARATH	193.91	37	0	7	7	24	24	7	0	0	0	0	0	7	0	0	0	0	14	20		2.2729E4	5.5876E4	1.5616E5	3.956E5	1.4941E4						0					1.0916E5	3.1333E4	5	5	0	1	3	4	11	3	0
50	303	Q9SHE7|RUB1_ARATH	193.91	30	0	6	6	20	20	6	0	0	0	0	0	6	0	0	0	0	12	16		2.2729E4	5.5876E4	1.5616E5	3.956E5	1.4941E4						0					1.0916E5	3.1333E4	5	5	0	1	3	4	11	3	0
50	302	Q8RUC6|RUB2_ARATH	193.91	31	0	6	6	20	20	6	0	0	0	0	0	6	0	0	0	0	12	16		2.2729E4	5.5876E4	1.5616E5	3.956E5	1.4941E4						0					1.0916E5	3.1333E4	5	5	0	1	3	4	11	3	0
143	739	O24456|GBLPA_ARATH	97.82	3	0	0	0	0	3	0	0	0	0	0	0	0	0	0	0	0	0	0					3.2154E4														1	1	0	0	0	0	1	0	0
143	451	Q9C4Z6|GPLPB_ARATH	97.82	3	0	0	0	0	3	0	0	0	0	0	0	0	0	0	0	0	0	0					3.2154E4														1	1	0	0	0	0	1	0	0
143	604	Q9LV28|GPLPC_ARATH	97.82	3	0	0	0	0	3	0	0	0	0	0	0	0	0	0	0	0	0	0					3.2154E4														1	1	0	0	0	0	1	0	0
97	107	Q6W8Q2|REHY_WHEAT	195.59	27	0	0	14	23	0	0	0	0	0	0	0	0	5	0	0	0	5	0			2.1047E5	1.5449E5									1.4741E3				1.904E4		7	7	0	0	4	6	0	0	0
87	113	P25696|ENO2_ARATH	206.51	22	15	2	0	0	0	0	5	0	5	0	0	8	0	0	0	0	0	0	1.772E5	1.9311E4					2.1356E3		8.87E4			6.4245E4							7	7	7	1	0	0	0	0	1
251	218	Q9LNU4|PSD3A_ARATH	97.77	5	0	0	0	0	0	0	2	0	0	0	0	1	0	0	0	0	0	0							7.1175E3					3.3234E3							3	3	0	0	0	0	0	0	1
160	85	Q03387|IF4G1_WHEAT	179.4	7	0	0	0	0	0	0	0	1	0	0	0	0	0	0	0	0	1	0								0									2.4349E4		6	6	0	0	0	0	0	0	0
219	586	O04487|EF1G1_ARATH	75.59	2	0	2	2	2	0	0	0	0	0	0	0	0	0	0	0	0	0	0		2.2367E4	4.3625E5	3.2389E5															1	1	0	1	1	1	0	0	0
127	243	Q96327|EBP1_ARATH	149.83	7	0	5	0	0	0	0	0	0	0	0	0	5	0	0	0	0	0	0		8.187E4										7.5772E4							3	3	0	2	0	0	0	0	0
13	157	P41916|RAN1_ARATH	254.97	36	0	0	19	12	27	0	0	0	0	0	0	0	0	0	0	0	5	0			2.5966E5	1.1531E5	1.3018E6												4.2245E4		9	9	0	0	5	6	16	0	0
13	158	P41917|RAN2_ARATH	254.97	36	0	0	19	12	27	0	0	0	0	0	0	0	0	0	0	0	5	0			2.5966E5	1.1531E5	1.3018E6												4.2245E4		9	9	0	0	5	6	16	0	0
13	159	Q8H156|RAN3_ARATH	254.97	36	0	0	19	12	27	0	0	0	0	0	0	0	0	0	0	0	5	0			2.5966E5	1.1531E5	1.3018E6												4.2245E4		9	9	0	0	5	6	16	0	0
52	49	Q39043|BIP2_ARATH	252.01	14	0	2	3	0	4	0	0	0	0	3	0	0	0	0	0	0	0	0					6.5622E3														11	9	0	1	1	0	2	0	0
231	178	Q6XJG8|PSD2B_ARATH	132.76	4	0	0	0	0	0	0	0	0	0	0	0	0	0	0	0	0	0	2																		1.0494E3	3	3	0	0	0	0	0	0	0
Plasma membrane
Protein Group	Protein ID	Accession	-10lgP	Coverage (%)	Coverage (%)																		Area																				#Spec
					Control-1	Control-2	Control-3	Control-4	Control-5	Control-6	Control-7	Control-8	Control-9	Control-10	Control-11	Control-12	Control-13	Control-14	Control-15	Control-16	Control-17	Control-18	Control-1	Control-2	Control-3	Control-4	Control-5	Control-6	Control-7	Control-8	Control-9	Control-10	Control-11	Control-12	Control-13	Control-14	Control-15	Control-16	Control-17	Control-18	#Peptides	#Unique	Control-1	Control-2	Control-3	Control-4	Control-5	Control-6	Control-7
108	283	Q9SID0|SCRK1_ARATH	128.24	7	0	0	0	4	0	0	0	0	0	0	0	0	0	0	0	0	0	0				3.608E3															2	1	0	0	0	1	0	0	0
231	178	Q6XJG8|PSD2B_ARATH	132.76	4	0	0	0	0	0	0	0	0	0	0	0	0	0	0	0	0	0	2																		1.0494E3	3	3	0	0	0	0	0	0	0
329	938	C0LGK4|Y2165_ARATH	57.43	1	0	0	0	0	0	0	0	0	0	0	0	1	0	0	0	0	0	0												4.4468E4							1	1	0	0	0	0	0	0	0
45	173	Q9FJH0|RAA1F_ARATH	208.9	26	0	0	15	26	15	0	0	0	0	0	0	0	0	0	0	0	22	0			1.9374E5	1.7652E5	3.1091E4												1.4753E5		6	1	0	0	9	14	3	0	0
45	117	Q9LK99|RAA1G_ARATH	208.9	26	0	0	15	26	15	0	0	0	0	0	0	0	0	0	0	0	22	0			1.9374E5	1.7652E5	3.1091E4												1.4753E5		6	1	0	0	9	14	3	0	0
69	155	Q1PEX3|RAA1H_ARATH	191.88	22	0	0	10	17	10	0	0	0	0	0	0	0	5	0	0	0	13	0													2.4153E3						5	1	0	0	5	10	2	0	0
151	147	P92963|RAB1C_ARATH	192.48	35	0	0	6	13	0	0	0	0	0	0	0	0	0	0	0	0	10	0			9.9034E3	5.8245E4													6.3732E4		6	6	0	0	1	3	0	0	0
195	248	O23657|RABC1_ARATH	116.88	15	0	0	0	6	0	0	0	0	0	0	0	0	0	0	0	0	5	0				3.6025E3															3	1	0	0	0	1	0	0	0
240	905	Q9SJ11|RABG2_ARATH	72.38	5	0	0	0	5	0	0	0	0	0	0	0	0	0	0	0	0	0	0				1.7652E5															1	1	0	0	0	2	0	0	0
240	948	Q948K8|RAG3A_ARATH	72.38	5	0	0	0	5	0	0	0	0	0	0	0	0	0	0	0	0	0	0				1.7652E5															1	1	0	0	0	2	0	0	0
182	372	O04157|RAG3B_ARATH	114.58	10	0	0	0	4	0	0	0	0	0	0	0	0	0	0	0	0	5	0				0															2	1	0	0	0	1	0	0	0
74	109	P28186|RAE1C_ARATH	189.15	25	0	0	21	19	0	0	0	0	0	0	0	0	5	0	0	0	19	0			2.0149E5	1.0638E5													1.5392E5		5	3	0	0	9	10	0	0	0
74	179	Q9LZD4|RAE1D_ARATH	189.15	25	0	0	21	19	0	0	0	0	0	0	0	0	5	0	0	0	19	0			2.0149E5	1.0638E5													1.5392E5		5	3	0	0	9	10	0	0	0
Plasmodesma
Protein Group	Protein ID	Accession	-10lgP	Coverage (%)	Coverage (%)																		Area																				#Spec
					Control-1	Control-2	Control-3	Control-4	Control-5	Control-6	Control-7	Control-8	Control-9	Control-10	Control-11	Control-12	Control-13	Control-14	Control-15	Control-16	Control-17	Control-18	Control-1	Control-2	Control-3	Control-4	Control-5	Control-6	Control-7	Control-8	Control-9	Control-10	Control-11	Control-12	Control-13	Control-14	Control-15	Control-16	Control-17	Control-18	#Peptides	#Unique	Control-1	Control-2	Control-3	Control-4	Control-5	Control-6	Control-7
108	364	Q9LNE3|SCRK2_ARATH	128.24	7	0	0	0	4	0	0	0	0	0	0	0	0	0	0	0	0	0	0				3.608E3															2	1	0	0	0	1	0	0	0
251	218	Q9LNU4|PSD3A_ARATH	97.77	5	0	0	0	0	0	0	2	0	0	0	0	1	0	0	0	0	0	0							7.1175E3					3.3234E3							3	3	0	0	0	0	0	0	1
219	586	O04487|EF1G1_ARATH	75.59	2	0	2	2	2	0	0	0	0	0	0	0	0	0	0	0	0	0	0		2.2367E4	4.3625E5	3.2389E5															1	1	0	1	1	1	0	0	0
150	253	P49040|SUS1_ARATH	144.98	4	0	0	0	0	0	0	0	0	0	3	0	0	0	0	0	0	0	0										4.7356E3									4	3	0	0	0	0	0	0	0
88	366	Q9LHG9|NACA1_ARATH	176.82	15	0	0	15	15	15	0	0	0	0	0	0	0	7	0	0	0	7	0			1.1246E5	6.2883E4	1.337E5								4.7221E3				4.3696E4		2	2	0	0	3	4	3	0	0
243	874	O24653|GDI2_ARATH	83.63	2	0	0	0	0	0	0	0	0	0	0	0	2	0	0	0	0	0	0												1.4197E5							1	1	0	0	0	0	0	0	0
88	363	Q6ICZ8|NACA3_ARATH	176.82	15	0	0	15	15	15	0	0	0	0	0	0	0	7	0	0	0	7	0			1.1246E5	6.2883E4	1.337E5								4.7221E3				4.3696E4		2	2	0	0	3	4	3	0	0
219	1083	Q9FVT2|EF1G2_ARATH	75.59	2	0	2	2	2	0	0	0	0	0	0	0	0	0	0	0	0	0	0		2.2367E4	4.3625E5	3.2389E5															1	1	0	1	1	1	0	0	0
281	806	P54873|HMCS_ARATH	63.38	2	0	2	0	0	0	0	0	0	0	0	0	2	0	0	0	0	0	0		1.7649E5										7.6144E4							1	1	0	1	0	0	0	0	0
Peroxisome
Protein Group	Protein ID	Accession	-10lgP	Coverage (%)	Coverage (%)																		Area																				#Spec
					Control-1	Control-2	Control-3	Control-4	Control-5	Control-6	Control-7	Control-8	Control-9	Control-10	Control-11	Control-12	Control-13	Control-14	Control-15	Control-16	Control-17	Control-18	Control-1	Control-2	Control-3	Control-4	Control-5	Control-6	Control-7	Control-8	Control-9	Control-10	Control-11	Control-12	Control-13	Control-14	Control-15	Control-16	Control-17	Control-18	#Peptides	#Unique	Control-1	Control-2	Control-3	Control-4	Control-5	Control-6	Control-7
49	116	Q9FWA3|6PGD2_ARATH	224.71	12	0	12	0	0	0	0	0	0	0	0	0	8	0	0	0	6	0	0		8.8969E5										7.8688E5				1.986E3			6	3	0	18	0	0	0	0	0
108	283	Q9SID0|SCRK1_ARATH	128.24	7	0	0	0	4	0	0	0	0	0	0	0	0	0	0	0	0	0	0				3.608E3															2	1	0	0	0	1	0	0	0
289	643	Q9LR30|GGT1_ARATH	77.35	4	0	4	0	0	0	0	0	0	0	0	0	0	0	0	0	0	0	0		2.9722E4																	1	1	0	1	0	0	0	0	0
289	531	Q9S7E9|GGT2_ARATH	77.35	4	0	4	0	0	0	0	0	0	0	0	0	0	0	0	0	0	0	0		2.9722E4																	1	1	0	1	0	0	0	0	0
Secreted
Protein Group	Protein ID	Accession	-10lgP	Coverage (%)	Coverage (%)																		Area																				#Spec
					Control-1	Control-2	Control-3	Control-4	Control-5	Control-6	Control-7	Control-8	Control-9	Control-10	Control-11	Control-12	Control-13	Control-14	Control-15	Control-16	Control-17	Control-18	Control-1	Control-2	Control-3	Control-4	Control-5	Control-6	Control-7	Control-8	Control-9	Control-10	Control-11	Control-12	Control-13	Control-14	Control-15	Control-16	Control-17	Control-18	#Peptides	#Unique	Control-1	Control-2	Control-3	Control-4	Control-5	Control-6	Control-7
219	586	O04487|EF1G1_ARATH	75.59	2	0	2	2	2	0	0	0	0	0	0	0	0	0	0	0	0	0	0		2.2367E4	4.3625E5	3.2389E5															1	1	0	1	1	1	0	0	0
219	1083	Q9FVT2|EF1G2_ARATH	75.59	2	0	2	2	2	0	0	0	0	0	0	0	0	0	0	0	0	0	0		2.2367E4	4.3625E5	3.2389E5															1	1	0	1	1	1	0	0	0
25	71	Q05855|PER1_WHEAT	311.61	49	0	0	0	0	43	0	0	0	0	0	0	0	0	0	5	0	0	0					2.8698E6														12	11	0	0	0	0	43	0	0
103	232	Q8L5C6|XIP1_WHEAT	214.49	15	0	0	0	0	11	0	0	0	0	0	0	0	0	0	0	0	0	0					4.6724E5														5	5	0	0	0	0	8	0	0
Vacuole
Protein Group	Protein ID	Accession	-10lgP	Coverage (%)	Coverage (%)																		Area																				#Spec
					Control-1	Control-2	Control-3	Control-4	Control-5	Control-6	Control-7	Control-8	Control-9	Control-10	Control-11	Control-12	Control-13	Control-14	Control-15	Control-16	Control-17	Control-18	Control-1	Control-2	Control-3	Control-4	Control-5	Control-6	Control-7	Control-8	Control-9	Control-10	Control-11	Control-12	Control-13	Control-14	Control-15	Control-16	Control-17	Control-18	#Peptides	#Unique	Control-1	Control-2	Control-3	Control-4	Control-5	Control-6	Control-7
219	586	O04487|EF1G1_ARATH	75.59	2	0	2	2	2	0	0	0	0	0	0	0	0	0	0	0	0	0	0		2.2367E4	4.3625E5	3.2389E5															1	1	0	1	1	1	0	0	0
219	1083	Q9FVT2|EF1G2_ARATH	75.59	2	0	2	2	2	0	0	0	0	0	0	0	0	0	0	0	0	0	0		2.2367E4	4.3625E5	3.2389E5															1	1	0	1	1	1	0	0	0
155	144	Q9LS94|RAG3F_ARATH	138.85	19	0	0	5	5	0	0	0	0	0	0	0	0	0	0	0	0	11	0			6.478E4	0													5.5528E4		4	3	0	0	1	1	0	0	0
150	308	Q9LXL5|SUS4_ARATH	144.98	4	0	0	0	0	0	0	0	0	0	3	0	0	0	0	0	0	0	0										4.7356E3									4	3	0	0	0	0	0	0	0
78	22	P11574|VATB1_ARATH	250.32	43	16	0	0	3	0	0	9	0	16	0	0	0	0	0	0	0	3	0	7.9566E4						2.4561E4		7.9091E4										13	1	10	0	0	1	0	0	4
77	14	Q9SZN1|VATB2_ARATH	257.09	45	15	0	0	3	2	0	6	0	13	0	0	0	0	0	0	0	3	0	5.6671E3				0														14	2	9	0	0	1	1	0	2
78	19	Q8W4E2|VATB3_ARATH	250.32	43	16	0	0	3	0	0	9	0	16	0	0	0	0	0	0	0	3	0	7.9566E4						2.4561E4		7.9091E4										13	1	10	0	0	1	0	0	4
Unknown
Protein Group	Protein ID	Accession	-10lgP	Coverage (%)	Coverage (%)																		Area																				#Spec
					Control-1	Control-2	Control-3	Control-4	Control-5	Control-6	Control-7	Control-8	Control-9	Control-10	Control-11	Control-12	Control-13	Control-14	Control-15	Control-16	Control-17	Control-18	Control-1	Control-2	Control-3	Control-4	Control-5	Control-6	Control-7	Control-8	Control-9	Control-10	Control-11	Control-12	Control-13	Control-14	Control-15	Control-16	Control-17	Control-18	#Peptides	#Unique	Control-1	Control-2	Control-3	Control-4	Control-5	Control-6	Control-7
290	1546	Q9C5C4|ARGE_ARATH	53.29	2	0	0	0	0	0	0	0	2	0	0	0	0	0	0	0	0	0	0								1.0573E4											1	1	0	0	0	0	0	0	0
286	1768	Q9SW48|INVB_ARATH	55.43	2	0	0	0	0	0	0	0	0	0	0	0	2	0	0	0	0	0	0												3.4378E4							1	1	0	0	0	0	0	0	0
286	847	F4I2X9|INVD_ARATH	55.43	2	0	0	0	0	0	0	0	0	0	0	0	2	0	0	0	0	0	0												3.4378E4							1	1	0	0	0	0	0	0	0
286	1468	Q9C560|INVF_ARATH	55.43	3	0	0	0	0	0	0	0	0	0	0	0	3	0	0	0	0	0	0												3.4378E4							1	1	0	0	0	0	0	0	0
183	691	Q42586|UMPS_ARATH	66.69	2	0	2	0	0	0	0	0	0	0	0	0	2	0	0	0	0	0	0		6.5028E4										3.0345E4							1	1	0	2	0	0	0	0	0
[truncated: 17 more columns]

## Sheet: Table S6-2
Table S6-2 Localization of proteins from Triticum aestivum, treatmented by Antimycin A
Apoplast
Protein Group	Protein ID	Accession	-10lgP	Coverage (%)	Coverage (%)																		Area																				#Spec
					Control-1	Control-2	Control-3	Control-4	Control-5	Control-6	Control-7	Control-8	Control-9	Control-10	Control-11	Control-12	Control-13	Control-14	Control-15	Control-16	Control-17	Control-18	Control-1	Control-2	Control-3	Control-4	Control-5	Control-6	Control-7	Control-8	Control-9	Control-10	Control-11	Control-12	Control-13	Control-14	Control-15	Control-16	Control-17	Control-18	#Peptides	#Unique	Control-1	Control-2	Control-3	Control-4	Control-5	Control-6	Control-7
121	217	P26759|GER3_WHEAT	158.22	23	4	0	0	0	0	0	0	0	0	0	0	0	0	0	0	0	0	0	6.4828E4																		4	4	1	0	0	0	0	0	0
Cell wall
Protein Group	Protein ID	Accession	-10lgP	Coverage (%)	Coverage (%)																		Area																				#Spec
					Control-1	Control-2	Control-3	Control-4	Control-5	Control-6	Control-7	Control-8	Control-9	Control-10	Control-11	Control-12	Control-13	Control-14	Control-15	Control-16	Control-17	Control-18	Control-1	Control-2	Control-3	Control-4	Control-5	Control-6	Control-7	Control-8	Control-9	Control-10	Control-11	Control-12	Control-13	Control-14	Control-15	Control-16	Control-17	Control-18	#Peptides	#Unique	Control-1	Control-2	Control-3	Control-4	Control-5	Control-6	Control-7
121	217	P26759|GER3_WHEAT	158.22	23	4	0	0	0	0	0	0	0	0	0	0	0	0	0	0	0	0	0	6.4828E4																		4	4	1	0	0	0	0	0	0
Chloroplast
Protein Group	Protein ID	Accession	-10lgP	Coverage (%)	Coverage (%)																		Area																				#Spec
					Control-1	Control-2	Control-3	Control-4	Control-5	Control-6	Control-7	Control-8	Control-9	Control-10	Control-11	Control-12	Control-13	Control-14	Control-15	Control-16	Control-17	Control-18	Control-1	Control-2	Control-3	Control-4	Control-5	Control-6	Control-7	Control-8	Control-9	Control-10	Control-11	Control-12	Control-13	Control-14	Control-15	Control-16	Control-17	Control-18	#Peptides	#Unique	Control-1	Control-2	Control-3	Control-4	Control-5	Control-6	Control-7
346	446	P24846|DAPA1_WHEAT	56.14	4	0	0	0	0	0	0	0	4	0	0	0	0	0	0	0	0	0	0								1.0053E4											1	1	0	0	0	0	0	0	0
318	854	Q9LEU8|ARLY_ARATH	60.33	2	0	0	0	0	0	0	0	0	0	2	0	0	0	0	0	0	0	0										1.9339E4									1	1	0	0	0	0	0	0	0
217	267	Q9SZX3|ASSY_ARATH	93.68	3	0	0	0	3	0	0	0	0	0	0	0	0	0	0	0	0	0	0				1.2225E5															2	2	0	0	0	3	0	0	0
324	726	Q9SW96|SYNC1_ARATH	54.64	2	0	2	0	0	0	0	0	0	0	0	0	0	0	0	0	0	0	0		4.4007E4																	1	1	0	1	0	0	0	0	0
324	1606	Q9SSK1|SYNC3_ARATH	54.64	2	0	2	0	0	0	0	0	0	0	0	0	0	0	0	0	0	0	0		4.4007E4																	1	1	0	1	0	0	0	0	0
241	808	Q9LFG2|DAPF_ARATH	61.23	3	0	3	0	0	0	0	0	3	0	0	0	0	0	0	0	0	0	0		4.3484E4						4.5077E4											1	1	0	2	0	0	0	0	0
327	1145	O50039|OTC_ARATH	50.24	2	0	2	0	0	0	0	0	0	0	0	0	0	0	0	0	0	0	0		5.3068E4																	1	1	0	1	0	0	0	0	0
145	101	Q10MQ2|DAPAT_ORYSJ	174.37	17	0	0	0	0	0	0	0	0	0	0	13	0	0	0	0	0	0	0											2.7402E5								6	6	0	0	0	0	0	0	0
210	268	Q9S7B5|THRC1_ARATH	110.64	5	0	0	0	2	0	0	0	0	0	2	0	0	0	0	0	0	0	0				1.2466E5						4.8074E3									2	2	0	0	0	3	0	0	0
222	338	Q8RWV0|TKTC1_ARATH	87.42	3	0	0	0	0	0	0	3	0	0	0	0	0	0	0	0	0	0	0							4.8872E4												2	2	0	0	0	0	0	0	2
335	371	P08823|RUBA_WHEAT	58.85	3	0	0	0	0	0	0	0	0	0	0	0	0	0	0	3	0	0	0															3.0927E3				1	1	0	0	0	0	0	0	0
173	221	A8MS68|PLPD1_ARATH	131.01	6	0	0	0	0	2	0	0	0	0	4	0	2	0	0	3	0	0	0					2.8125E4					1.5227E4		1.988E4			4.1038E4				3	3	0	0	0	0	1	0	0
173	241	F4JLP5|PLPD2_ARATH	131.01	7	0	0	0	0	2	0	0	0	0	4	0	2	0	0	4	0	0	0					2.8125E4					1.5227E4		1.988E4			4.1038E4				3	3	0	0	0	0	1	0	0
282	379	Q9C9C4|ENO1_ARATH	71.3	4	0	0	0	0	4	0	0	0	0	0	0	0	0	0	0	0	0	0					1.5741E4														1	1	0	0	0	0	1	0	0
120	154	P93819|MDHC1_ARATH	177.33	14	0	10	0	0	0	0	0	11	0	0	0	0	0	0	0	0	0	0		1.8674E5						2.736E5											4	4	0	11	0	0	0	0	0
200	252	Q9SN86|MDHP_ARATH	153.77	7	0	7	0	0	0	0	0	4	0	0	0	0	0	0	0	0	0	0		1.0674E5						1.0177E5											3	1	0	3	0	0	0	0	0
360	2748	Q9FH13|RRAA3_ARATH	53.59	5	0	0	0	0	0	0	0	5	0	0	0	0	0	0	0	0	0	0								2.2265E4											1	1	0	0	0	0	0	0	0
222	599	F4IW47|TKTC2_ARATH	87.42	3	0	0	0	0	0	0	3	0	0	0	0	0	0	0	0	0	0	0							4.8872E4												2	2	0	0	0	0	0	0	2
169	563	Q8W593|LGUC_ARATH	97.57	4	0	4	0	0	0	0	0	4	0	0	0	0	0	0	0	0	0	0		2.4226E5						3.5401E5											1	1	0	4	0	0	0	0	0
229	334	Q9S9P8|FNRR2_ARATH	87.5	6	0	6	0	0	0	0	0	2	0	0	0	0	0	0	0	0	0	0		1.4833E5						2.4764E4											2	2	0	4	0	0	0	0	0
172	533	Q9SLA8|FABI_ARATH	82.99	3	0	3	0	0	0	0	0	3	0	0	0	0	0	0	0	0	0	0		3.0667E5						2.1358E5											1	1	0	3	0	0	0	0	0
337	1673	O65282|CH20_ARATH	62.4	4	4	0	0	0	0	0	0	0	0	0	0	0	0	0	0	0	0	0	2.7787E4																		1	1	1	0	0	0	0	0	0
193	143	Q9LTX9|HSP7G_ARATH	123.8	6	0	0	0	0	0	0	4	0	0	0	0	0	0	0	0	0	0	0							4.7757E4												3	3	0	0	0	0	0	0	2
117	67	O24396|PURA_WHEAT	223.39	24	0	0	0	8	4	0	0	0	0	4	0	0	0	0	0	0	0	0				4.7834E5	2.1934E3					6.5345E4									9	8	0	0	0	9	1	0	0
131	127	P80602|BAS1_WHEAT	206.62	29	10	0	0	0	0	0	0	0	0	0	0	0	0	0	0	0	0	0	4.3776E4																		5	5	3	0	0	0	0	0	0
165	90	Q1XIR9|HGL1A_WHEAT	156.88	13	0	0	0	3	0	0	0	0	0	0	3	0	0	0	0	0	0	0				7.9406E4															7	5	0	0	0	2	0	0	0
181	114	D5MTF8|HGL1D_WHEAT	120.07	7	0	2	0	2	0	0	0	0	0	0	3	0	0	0	0	0	0	0		9.8551E4		7.2296E4															3	1	0	2	0	2	0	0	0
253	445	Q42593|APXT_ARATH	91.74	2	0	0	2	0	0	0	0	0	0	0	0	0	0	0	0	0	0	0			1.9438E4																1	1	0	0	1	0	0	0	0
253	646	Q42592|APXS_ARATH	91.74	2	0	0	2	0	0	0	0	0	0	0	0	0	0	0	0	0	0	0			1.9438E4																1	1	0	0	1	0	0	0	0
142	356	P47999|CYSKP_ARATH	159.43	10	3	7	0	0	0	0	0	6	0	0	0	0	0	0	0	0	0	0		3.9217E4						1.5567E4											3	2	1	7	0	0	0	0	0
60	125	Q9SH69|6PGD1_ARATH	188.25	11	0	0	0	7	0	0	0	0	0	5	0	0	0	0	0	2	2	0				1.5444E5						5.462E4									4	1	0	0	0	10	0	0	0
132	476	Q00917|SUS2_ARATH	118.79	2	0	0	0	0	0	0	2	0	0	0	0	0	0	0	0	0	0	0							3.5092E4												2	1	0	0	0	0	0	0	3
153	306	Q43199|APT1_WHEAT	164.59	29	5	0	0	0	0	0	0	0	0	0	0	0	0	0	0	0	0	0	6.4904E4																		4	4	2	0	0	0	0	0	0
140	200	Q42669|ACOHC_CUCMC	165.66	6	0	0	0	0	0	0	0	0	4	0	0	0	0	0	0	0	0	4																		1.0483E4	3	1	0	0	0	0	0	0	0
76	39	P38076|CYSK_WHEAT	281.82	50	4	35	0	0	0	0	0	23	0	0	0	0	0	0	0	0	0	0		5.3416E5						3.3895E5											12	11	1	23	0	0	0	0	0
160	85	Q03387|IF4G1_WHEAT	179.4	7	1	1	0	0	0	0	0	1	0	0	0	0	0	0	0	0	0	0	4.1618E4	6.6982E3						1.4259E4											6	6	2	1	0	0	0	0	0
109	156	Q9C5U3|PRS8A_ARATH	149.17	10	0	0	3	3	0	0	0	0	0	3	10	0	0	0	0	3	0	0											2.8735E4								3	2	0	0	1	5	0	0	0
220	385	O24473|IF2B_WHEAT	89.53	7	0	3	0	0	0	0	0	0	0	0	0	0	0	0	0	0	0	0		3.3078E4																	2	2	0	1	0	0	0	0	0
Cytoplasm
Protein Group	Protein ID	Accession	-10lgP	Coverage (%)	Coverage (%)																		Area																				#Spec
					Control-1	Control-2	Control-3	Control-4	Control-5	Control-6	Control-7	Control-8	Control-9	Control-10	Control-11	Control-12	Control-13	Control-14	Control-15	Control-16	Control-17	Control-18	Control-1	Control-2	Control-3	Control-4	Control-5	Control-6	Control-7	Control-8	Control-9	Control-10	Control-11	Control-12	Control-13	Control-14	Control-15	Control-16	Control-17	Control-18	#Peptides	#Unique	Control-1	Control-2	Control-3	Control-4	Control-5	Control-6	Control-7
17	81	O50008|METE1_ARATH	285.94	15	1	2	0	0	0	1	11	2	0	0	1	0	0	0	0	0	2	1	6.6083E4	8.3476E4				0	1.365E6	8.9605E4			5.1862E4						9.847E3	0	10	10	2	4	0	0	0	1	29
124	228	P35510|PAL1_ARATH	155.36	6	0	0	0	0	0	0	6	0	0	0	0	0	0	0	0	0	0	0							3.1562E4												3	1	0	0	0	0	0	0	7
106	142	Q9SS45|PAL4_ARATH	196.3	7	0	0	0	0	0	0	6	0	0	0	0	0	0	0	0	0	0	0							1.5195E5												6	4	0	0	0	0	0	0	8
124	168	Q43210|PALY_WHEAT	155.36	6	0	0	0	0	0	0	6	0	0	0	0	0	0	0	0	0	0	0							3.1562E4												3	1	0	0	0	0	0	0	7
206	436	Q9M1R2|SYPC_ARATH	102.95	4	0	0	0	0	4	0	0	0	0	0	0	4	0	0	4	0	0	0					2.4845E4							2.6065E4			3.5631E4				1	1	0	0	0	0	2	0	0
61	132	O23254|GLYC4_ARATH	203.78	15	0	0	0	6	5	0	0	0	0	7	0	0	0	0	7	7	0	0				9.0945E5	9.0309E4					1.1589E5					9.2704E4	2.735E4			6	5	0	0	0	12	3	0	0
134	509	Q9SVM4|GLYC5_ARATH	93.9	3	0	0	0	3	0	0	0	0	0	1	0	0	0	0	1	1	0	0				3.0303E5															2	1	0	0	0	4	0	0	0
179	505	Q9LM59|GLYC6_ARATH	84.34	2	0	0	0	2	2	0	0	0	0	0	0	0	0	0	2	0	0	0				5.6605E5	4.6986E3										8.3584E3				1	1	0	0	0	3	2	0	0
179	943	Q84WV0|GLYC7_ARATH	84.34	2	0	0	0	2	2	0	0	0	0	0	0	0	0	0	2	0	0	0				5.6605E5	4.6986E3										8.3584E3				1	1	0	0	0	3	2	0	0
137	153	P93594|AMYB_WHEAT	193.75	8	0	0	0	0	8	0	0	0	0	0	0	5	0	0	8	0	0	0					2.0047E5							1.5712E5			3.4794E5				3	3	0	0	0	0	5	0	0
157	131	Q9SRZ6|ICDHC_ARATH	163.72	14	3	8	0	0	0	0	0	4	0	0	2	0	0	0	0	0	0	0		0						2.6201E3											5	2	1	5	0	0	0	0	0
115	201	Q9LF98|ALFC8_ARATH	201.06	11	0	9	0	0	0	0	0	7	0	0	0	0	0	0	0	0	0	0		9.9673E5						3.631E5											5	5	0	12	0	0	0	0	0
226	230	Q93VR3|GME_ARATH	109.34	8	0	0	0	2	0	0	0	0	0	0	0	0	0	0	0	0	0	0				6.3362E4															3	3	0	0	0	1	0	0	0
59	29	Q9MAH0|CAPP1_ARATH	265.54	17	0	0	0	0	0	5	0	0	3	0	0	0	0	0	0	0	0	10						2.1014E4												7.0173E4	13	3	0	0	0	0	0	4	0
71	33	Q5GM68|CAPP2_ARATH	266.39	17	0	0	0	0	0	5	0	0	6	0	0	0	0	0	0	0	0	7						3.9075E3			3.7214E4									3.6973E4	13	3	0	0	0	0	0	3	0
108	534	Q9M1B9|SCRK4_ARATH	128.24	7	4	7	0	0	0	0	0	7	0	0	0	0	0	0	0	0	0	0	5.361E3	1.1821E5						1.3882E5											2	1	1	5	0	0	0	0	0
101	310	O82616|SCRK5_ARATH	152.74	10	0	10	0	0	0	0	0	10	0	0	0	0	3	0	0	0	0	0		5.955E5						6.9634E5					2.3457E3						3	3	0	7	0	0	0	0	0
162	437	Q9FLH8|SCRK7_ARATH	114.43	6	0	6	0	0	0	0	0	6	0	0	0	0	0	0	0	0	0	0		2.9808E5						1.9769E5											2	1	0	3	0	0	0	0	0
65	95	P57751|UGPA1_ARATH	212.52	13	0	0	0	4	13	0	0	0	0	7	0	5	0	0	11	3	0	0				2.4541E5	3.2911E5					7.1208E4		6.1707E4			3.162E5	2.8904E3			5	5	0	0	0	3	11	0	0
65	103	Q9M9P3|UGPA2_ARATH	212.52	13	0	0	0	4	13	0	0	0	0	7	0	5	0	0	11	3	0	0				2.4541E5	3.2911E5					7.1208E4		6.1707E4			3.162E5	2.8904E3			5	5	0	0	0	3	11	0	0
46	149	Q8LRM8|TCTP_WHEAT	258.67	44	35	0	0	0	0	0	0	0	0	0	0	0	0	0	0	0	0	0	1.4203E6																		8	8	23	0	0	0	0	0	0
41	24	Q9ZRB7|TBA_WHEAT	288.73	48	0	8	0	22	14	4	4	2	8	9	11	3	0	0	9	7	0	0		8.6477E4		6.8615E5	0			1.2429E5		5.1955E3	1.1648E5				1.1758E4	1.9694E3			16	4	0	5	0	22	3	1	1
30	16	Q9ZRB2|TBB1_WHEAT	282.92	41	0	10	2	19	23	2	2	10	2	9	8	8	0	0	15	10	0	2			5.0853E4	1.3161E5				9.5525E4			0								17	1	0	4	1	22	10	1	1
36	15	Q9ZRB1|TBB2_WHEAT	286.61	45	0	12	0	21	24	2	2	10	2	7	8	8	0	0	15	8	0	2		4.3827E4		4.9218E4				2.5984E4			8.3735E3								18	1	0	5	0	22	10	1	1
18	12	Q9ZRB0|TBB3_WHEAT	307.49	54	0	9	3	22	31	2	2	10	5	9	4	8	0	0	18	10	0	2					1.5159E4				0										20	2	0	4	1	24	11	1	1
30	13	Q9ZRA8|TBB5_WHEAT	282.92	40	0	10	2	19	23	2	2	10	2	9	8	8	0	0	15	10	0	2			5.0853E4	1.3161E5				9.5525E4			0								17	1	0	4	1	22	10	1	1
175	124	Q9ZUY6|AXS1_ARATH	177.29	17	0	0	0	0	0	0	0	0	0	0	13	0	0	0	0	0	0	0											1.8453E5								6	6	0	0	0	0	0	0	0
175	118	Q9SGE0|AXS2_ARATH	177.29	17	0	0	0	0	0	0	0	0	0	0	13	0	0	0	0	0	0	0											1.8453E5								6	6	0	0	0	0	0	0	0
158	514	Q9SGY2|ACLA1_ARATH	111.48	4	0	0	0	2	0	0	0	0	0	0	2	0	0	0	0	0	0	0				3.0111E4							1.6725E4								2	2	0	0	0	2	0	0	0
158	508	O22718|ACLA2_ARATH	111.48	4	0	0	0	2	0	0	0	0	0	0	2	0	0	0	0	0	0	0				3.0111E4							1.6725E4								2	2	0	0	0	2	0	0	0
158	499	O80526|ACLA3_ARATH	111.48	4	0	0	0	2	0	0	0	0	0	0	2	0	0	0	0	0	0	0				3.0111E4							1.6725E4								2	2	0	0	0	2	0	0	0
212	411	Q9FIE8|UXS3_ARATH	123.55	8	0	0	4	0	0	0	0	2	0	0	0	0	0	0	0	0	0	0			1.5252E4																3	2	0	0	1	0	0	0	0
212	418	Q9SN95|UXS5_ARATH	123.55	9	0	0	4	0	0	0	0	2	0	0	0	0	0	0	0	0	0	0			1.5252E4																3	2	0	0	1	0	0	0	0
212	440	Q9ZV36|UXS6_ARATH	123.55	8	0	0	4	0	0	0	0	2	0	0	0	0	0	0	0	0	0	0			1.5252E4																3	2	0	0	1	0	0	0	0
164	616	Q8L8Y0|RS21_ARATH	130.56	6	0	0	6	0	0	0	0	0	0	0	0	0	0	0	0	0	0	0			6.0853E3																2	2	0	0	3	0	0	0	0
164	784	Q93VB8|RS22_ARATH	130.56	6	0	0	6	0	0	0	0	0	0	0	0	0	0	0	0	0	0	0			6.0853E3																2	2	0	0	3	0	0	0	0
164	556	P49688|RS23_ARATH	130.56	6	0	0	6	0	0	0	0	0	0	0	0	0	0	0	0	0	0	0			6.0853E3																2	2	0	0	3	0	0	0	0
164	957	Q9SCM3|RS24_ARATH	130.56	6	0	0	6	0	0	0	0	0	0	0	0	0	0	0	0	0	0	0			6.0853E3																2	2	0	0	3	0	0	0	0
15	92	Q9FJA6|RS33_ARATH	273.44	30	8	0	10	0	0	0	0	0	0	0	0	0	0	0	0	0	0	0	0		1.5946E5																9	9	3	0	3	0	0	0	0
37	171	Q93VH9|RS41_ARATH	240.15	22	0	0	19	0	0	0	0	4	0	0	0	0	0	0	0	0	0	0			2.4635E6					3.2796E4											5	5	0	0	18	0	0	0	0
37	169	P49204|RS42_ARATH	240.15	22	0	0	19	0	0	0	0	4	0	0	0	0	0	0	0	0	0	0			2.4635E6					3.2796E4											5	5	0	0	18	0	0	0	0
37	140	Q8VYK6|RS43_ARATH	240.15	22	0	0	19	0	0	0	0	4	0	0	0	0	0	0	0	0	0	0			2.4635E6					3.2796E4											5	5	0	0	18	0	0	0	0
28	291	O48549|RS61_ARATH	221.72	13	0	0	13	0	0	0	0	0	0	0	0	0	0	0	0	0	0	0			2.0666E6																4	4	0	0	18	0	0	0	0
113	314	Q9FIF3|RS82_ARATH	161.15	17	0	0	17	0	0	0	0	0	0	0	0	0	0	0	0	0	0	0			3.4047E5																3	2	0	0	8	0	0	0	0
104	139	Q9FLF0|RS92_ARATH	160.89	27	10	0	0	0	0	0	0	0	0	0	0	0	0	0	8	0	0	0	1.6554E5														8.7964E2				5	5	4	0	0	0	0	0	0
39	205	Q08682|RSSA1_ARATH	215.99	20	10	10	10	0	0	0	0	10	0	0	10	0	0	0	0	0	0	0	3.3572E5	1.0388E5	1.5983E5					5.9071E4			1.185E4								4	4	10	3	3	0	0	0	0
214	1050	Q42112|RLA02_ARATH	90.97	5	0	5	2	0	0	0	0	0	0	0	0	0	0	0	0	0	0	0		7.7505E5	8.0194E3																2	2	0	3	1	0	0	0	0
35	146	Q93VT9|RL101_ARATH	203.51	21	21	5	0	0	0	0	0	0	0	0	0	0	0	0	0	0	0	0	1.6708E6	0																	5	5	22	1	0	0	0	0	0
35	176	Q08770|RL102_ARATH	203.51	21	21	5	0	0	0	0	0	0	0	0	0	0	0	0	0	0	0	0	1.6708E6	0																	5	5	22	1	0	0	0	0	0
35	190	Q93W22|RL103_ARATH	203.51	21	21	5	0	0	0	0	0	0	0	0	0	0	0	0	0	0	0	0	1.6708E6	0																	5	5	22	1	0	0	0	0	0
207	729	P50883|RL121_ARATH	96.97	9	9	0	0	0	0	0	0	0	0	0	0	0	0	0	0	0	0	0	5.305E3																		1	1	1	0	0	0	0	0	0
207	730	Q9LFH5|RL122_ARATH	96.97	9	9	0	0	0	0	0	0	0	0	0	0	0	0	0	0	0	0	0	5.305E3																		1	1	1	0	0	0	0	0	0
207	727	Q9FF52|RL123_ARATH	96.97	9	9	0	0	0	0	0	0	0	0	0	0	0	0	0	0	0	0	0	5.305E3																		1	1	1	0	0	0	0	0	0
92	264	P41127|RL131_ARATH	195.9	17	0	0	17	0	0	0	0	0	0	0	0	0	0	0	0	0	0	0			7.451E3																6	1	0	0	12	0	0	0	0
73	182	Q9FF90|RL133_ARATH	238.37	19	0	0	17	0	0	0	0	0	0	0	0	0	0	0	0	0	0	0			8.1606E4																8	3	0	0	13	0	0	0	0
139	1877	Q9LRX8|R13A2_ARATH	67.51	4	4	0	0	0	0	0	0	0	0	0	0	0	0	0	0	0	0	0	1.7363E5																		1	1	2	0	0	0	0	0	0
139	5446	Q9SVR0|R13A3_ARATH	67.51	4	4	0	0	0	0	0	0	0	0	0	0	0	0	0	0	0	0	0	1.7363E5																		1	1	2	0	0	0	0	0	0
139	4291	Q9FKC0|R13A4_ARATH	67.51	4	4	0	0	0	0	0	0	0	0	0	0	0	0	0	0	0	0	0	1.7363E5																		1	1	2	0	0	0	0	0	0
47	292	Q9SRX2|RL191_ARATH	188.09	9	9	0	0	0	0	0	0	0	0	0	0	0	0	0	0	0	0	0	2.1444E6																		5	5	17	0	0	0	0	0	0
47	231	P49693|RL193_ARATH	188.09	10	10	0	0	0	0	0	0	0	0	0	0	0	0	0	0	0	0	0	2.1444E6																		5	5	17	0	0	0	0	0	0
31	100	P22738|RL32_ARATH	278.73	17	0	0	5	12	0	0	0	0	0	0	11	0	0	0	2	2	8	0											1.4868E5								10	2	0	0	2	11	0	0	0
118	311	Q8LBI1|RL51_ARATH	180.08	11	0	11	0	0	0	0	0	5	0	0	0	0	0	0	0	0	0	5		1.4132E6						4.2035E5										2.3068E3	4	4	0	13	0	0	0	0	0
118	305	P49227|RL52_ARATH	180.08	11	0	11	0	0	0	0	0	5	0	0	0	0	0	0	0	0	0	5		1.4132E6						4.2035E5										2.3068E3	4	4	0	13	0	0	0	0	0
48	269	P49692|RL7A1_ARATH	183.77	12	0	0	12	0	0	0	0	0	0	0	0	0	0	0	0	0	0	0			1.7261E6																5	5	0	0	26	0	0	0	0
48	222	Q9LZH9|RL7A2_ARATH	183.77	12	0	0	12	0	0	0	0	0	0	0	0	0	0	0	0	0	0	0			1.7261E6																5	5	0	0	26	0	0	0	0
68	186	P46286|RL81_ARATH	196.77	16	4	0	11	0	0	0	0	0	0	0	0	0	0	0	0	0	0	0	0		1.8679E6																5	5	1	0	17	0	0	0	0
3	63	P0DH99|EF1A1_ARATH	325.5	29	4	16	17	20	0	0	0	5	0	9	6	0	0	4	16	11	9	0				2.0473E5															13	2	2	6	8	58	0	0	0
3	61	Q8W4H7|EF1A2_ARATH	325.5	29	4	16	17	20	0	0	0	5	0	9	6	0	0	4	16	11	9	0				2.0473E5															13	2	2	6	8	58	0	0	0
3	62	Q0WL56|EF1A3_ARATH	325.5	29	4	16	17	20	0	0	0	5	0	9	6	0	0	4	16	11	9	0				2.0473E5															13	2	2	6	8	58	0	0	0
3	64	Q8GTY0|EF1A4_ARATH	325.5	29	4	16	17	20	0	0	0	5	0	9	6	0	0	4	16	11	9	0				2.0473E5															13	2	2	6	8	58	0	0	0
1	9	Q03033|EF1A_WHEAT	380.8	44	7	16	17	35	10	0	0	5	5	22	6	0	0	4	29	21	9	0	2.6954E4			4.1487E6	7.0121E4				9.2948E3	2.7313E5					1.5508E5	1.3838E5			17	6	4	6	8	80	3	0	0
44	138	P29546|EF1B_WHEAT	261.34	36	0	0	27	0	0	0	0	0	0	0	0	0	0	0	0	0	0	0			3.1479E6																8	8	0	0	32	0	0	0	0
51	58	Q9ASR1|EF2_ARATH	239.59	13	0	3	3	1	1	3	0	3	2	1	0	0	0	0	4	0	0	2		9.788E3	4.371E4	0	0	1.5305E4		3.5861E3	1.0274E4	0					2.336E4			6.1599E4	10	10	0	3	2	1	2	2	0
4	4	P41378|IF4A_WHEAT	410.02	52	0	0	3	52	0	0	0	0	2	20	12	0	0	2	2	13	18	0			3.4526E4	6.5128E6					5.4826E3	4.6622E5	1.9571E5			1.1298E3	0	8.4883E4	2.6451E4		23	21	0	0	1	69	0	0	0
228	495	Q38884|EIF3I_ARATH	72.78	3	0	0	3	0	0	0	0	0	0	0	0	0	0	0	0	0	0	0			8.164E4																1	1	0	0	2	0	0	0	0
187	452	Q9LTR9|NMT1_ARATH	101.51	5	0	0	0	0	0	0	0	0	0	0	3	0	0	0	0	0	0	0											4.3508E4								2	2	0	0	0	0	0	0	0
267	299	Q9LXC0|GDI_ARATH	99.67	7	0	0	0	0	0	0	0	0	0	3	0	0	0	0	0	0	0	0										3.6346E3									2	2	0	0	0	0	0	0	0
53	98	Q9S9N1|HSP7E_ARATH	233.7	14	2	0	7	2	0	0	7	0	0	0	3	0	0	0	0	0	0	3							1.4374E4												8	2	1	0	4	2	0	0	7
56	41	P55737|HS902_ARATH	275.46	25	0	0	0	3	0	0	19	0	0	0	0	0	0	0	2	2	0	2							4.3286E3												17	1	0	0	0	2	0	0	25
111	76	Q940P8|TCPB_ARATH	219.73	19	0	0	2	0	0	0	0	0	0	0	0	0	0	0	0	0	0	0			5.1146E4																7	7	0	0	2	0	0	0	0
114	106	O04450|TCPE_ARATH	185.26	11	0	0	6	0	0	0	0	0	0	0	0	0	0	0	0	0	0	0			1.6271E5																6	6	0	0	5	0	0	0	0
344	427	Q9SX52|FYPP1_ARATH	53.06	5	0	0	0	0	0	0	0	5	0	0	0	0	0	0	0	0	0	0								1.1193E4											1	1	0	0	0	0	0	0	0
344	428	Q9LHE7|FYPP3_ARATH	53.06	5	0	0	0	0	0	0	0	5	0	0	0	0	0	0	0	0	0	0								1.1193E4											1	1	0	0	0	0	0	0	0
224	122	P55313|CATA2_WHEAT	130.55	4	0	0	0	2	3	0	0	0	0	0	0	0	0	0	0	0	0	0				7.6314E4	1.6747E4														2	2	0	0	0	1	1	0	0
90	612	Q05431|APX1_ARATH	89.3	4	4	0	4	0	0	0	0	0	0	0	0	0	0	0	0	0	0	0	2.0687E5		0																1	1	3	0	1	0	0	0	0
91	422	Q1PER6|APX2_ARATH	88.19	4	0	0	4	0	0	0	0	0	0	0	0	0	0	0	0	0	0	0			7.3718E4																1	1	0	0	1	0	0	0	0
254	393	Q39097|ERF1X_ARATH	107.16	6	0	0	0	3	0	0	0	0	0	3	0	0	0	0	0	0	0	0				3.154E4						4.1219E3									2	2	0	0	0	1	0	0	0
121	217	P26759|GER3_WHEAT	158.22	23	4	0	0	0	0	0	0	0	0	0	0	0	0	0	0	0	0	0	6.4828E4																		4	4	1	0	0	0	0	0	0
142	356	P47999|CYSKP_ARATH	159.43	10	3	7	0	0	0	0	0	6	0	0	0	0	0	0	0	0	0	0		3.9217E4						1.5567E4											3	2	1	7	0	0	0	0	0
60	125	Q9SH69|6PGD1_ARATH	188.25	11	0	0	0	7	0	0	0	0	0	5	0	0	0	0	0	2	2	0				1.5444E5						5.462E4									4	1	0	0	0	10	0	0	0
132	476	Q00917|SUS2_ARATH	118.79	2	0	0	0	0	0	0	2	0	0	0	0	0	0	0	0	0	0	0							3.5092E4												2	1	0	0	0	0	0	0	3
153	306	Q43199|APT1_WHEAT	164.59	29	5	0	0	0	0	0	0	0	0	0	0	0	0	0	0	0	0	0	6.4904E4																		4	4	2	0	0	0	0	0	0
140	200	Q42669|ACOHC_CUCMC	165.66	6	0	0	0	0	0	0	0	0	4	0	0	0	0	0	0	0	0	4																		1.0483E4	3	1	0	0	0	0	0	0	0
76	39	P38076|CYSK_WHEAT	281.82	50	4	35	0	0	0	0	0	23	0	0	0	0	0	0	0	0	0	0		5.3416E5						3.3895E5											12	11	1	23	0	0	0	0	0
26	26	P53496|ACT11_ARATH	296.5	37	8	22	8	11	0	0	8	11	0	0	8	0	0	0	0	0	0	0		7.2571E4																	12	1	3	20	5	3	0	0	1
12	32	P53497|ACT12_ARATH	303.54	37	11	22	10	11	0	3	8	14	0	0	8	0	0	0	0	0	0	0	7.3259E4	2.4194E5	1.366E5			2.7279E3		7.9906E4											12	1	5	18	7	3	0	1	1
12	31	P53494|ACT4_ARATH	303.54	37	11	22	10	11	0	3	8	14	0	0	8	0	0	0	0	0	0	0	7.3259E4	2.4194E5	1.366E5			2.7279E3		7.9906E4											12	1	5	18	7	3	0	1	1
33	37	P53492|ACT7_ARATH	287.51	38	8	16	8	11	0	0	8	10	0	0	8	0	0	0	0	0	0	0								2.9285E4											12	2	3	16	5	3	0	0	1
108	312	Q9LNE4|SCRK3_ARATH	128.24	6	4	6	0	0	0	0	0	6	0	0	0	0	0	0	0	0	0	0	5.361E3	1.1821E5						1.3882E5											2	1	1	5	0	0	0	0	0
108	364	Q9LNE3|SCRK2_ARATH	128.24	7	4	7	0	0	0	0	0	7	0	0	0	0	0	0	0	0	0	0	5.361E3	1.1821E5						1.3882E5											2	1	1	5	0	0	0	0	0
252	254	Q9SV21|COPB1_ARATH	103.22	3	0	0	0	0	0	0	0	0	0	0	0	1	0	0	0	0	0	0												7.78E3							3	3	0	0	0	0	0	0	0
252	256	Q9SV20|COPB2_ARATH	103.22	3	0	0	0	0	0	0	0	0	0	0	0	1	0	0	0	0	0	0												7.78E3							3	3	0	0	0	0	0	0	0
237	198	Q0WW26|COPG_ARATH	110.72	3	0	0	0	0	0	0	0	0	1	0	0	0	0	0	0	0	0	0									9.94E3										2	2	0	0	0	0	0	0	0
287	403	Q9SSQ9|PLDA2_ARATH	63.98	2	0	0	0	0	0	0	2	0	0	0	0	0	0	0	0	0	0	0							8.2117E3												1	1	0	0	0	0	0	0	1
126	73	Q42560|ACO1_ARATH	197	10	0	0	0	0	0	1	0	0	4	0	0	0	0	0	0	0	0	6																		3.8337E4	8	4	0	0	0	0	0	2	0
100	68	Q9SIB9|ACO3M_ARATH	228.68	10	0	0	0	0	0	2	0	0	8	0	0	0	0	0	0	0	0	5						0			4.1103E4									5.1377E4	7	2	0	0	0	0	0	3	0
62	294	P48491|TPIS_ARATH	129.02	7	7	0	0	0	0	0	0	0	0	0	0	0	0	0	0	0	0	0	1.1516E6																		2	2	9	0	0	0	0	0	0
266	529	Q39243|TRXB1_ARATH	68.98	4	0	0	0	0	0	0	0	4	0	0	0	0	0	0	0	0	0	0								5.4626E4											1	1	0	0	0	0	0	0	0
266	613	Q39242|TRXB2_ARATH	68.98	4	0	0	0	0	0	0	0	4	0	0	0	0	0	0	0	0	0	0								5.4626E4											1	1	0	0	0	0	0	0	0
185	180	Q9ZPS3|DCE4_ARATH	130.17	12	0	0	0	0	6	0	0	0	0	0	0	2	0	0	6	0	0	0					0							0			1.5014E4				4	4	0	0	0	0	2	0	0
130	571	O48661|SPDS2_ARATH	121.02	8	0	4	0	0	0	0	0	8	0	0	0	0	0	0	0	0	0	0		2.0073E5						2.4878E5											2	2	0	7	0	0	0	0	0
22	148	P46077|14334_ARATH	228.62	20	0	4	16	0	0	0	0	0	0	0	0	0	0	0	0	0	0	0			9.7607E5																8	1	0	1	30	0	0	0	0
43	211	P42644|14333_ARATH	211.9	20	0	0	16	0	0	0	0	0	0	0	0	0	0	0	0	0	0	0			2.1434E5																7	1	0	0	23	0	0	0	0
54	162	P25858|G3PC1_ARATH	195.26	20	17	11	9	0	0	0	0	11	0	0	0	0	0	0	0	0	0	4	1.8418E5	4.9165E5	1.6919E5					3.1996E5										1.1785E4	5	5	7	7	6	0	0	0	0
54	141	Q9FX54|G3PC2_ARATH	195.26	20	17	11	9	0	0	0	0	11	0	0	0	0	0	0	0	0	0	4	1.8418E5	4.9165E5	1.6919E5					3.1996E5										1.1785E4	5	5	7	7	6	0	0	0	0
79	25	Q9SCN8|CD48D_ARATH	271.86	20	0	0	0	0	0	5	0	0	11	0	0	0	0	0	0	0	0	7																		1.9993E4	15	1	0	0	0	0	0	5	0
154	220	P48347|14310_ARATH	139.02	10	0	0	6	0	0	0	0	0	0	0	0	0	0	0	0	0	0	0			5.0121E4																3	1	0	0	2	0	0	0	0
16	137	Q96300|14337_ARATH	245.19	26	0	5	22	0	0	0	0	0	0	0	0	0	0	0	0	0	0	0			7.2641E5																10	3	0	1	33	0	0	0	0
7	108	Q9FZE1|UGDH1_ARATH	262.33	18	2	5	5	10	5	2	0	5	2	10	12	0	0	0	5	7	7	5			0	6.6022E5						6.5616E4	2.3896E4					3.3475E3	5.6684E3		8	3	2	3	2	23	2	1	0
8	69	Q9LIA8|UGDH2_ARATH	252.35	21	2	5	2	10	5	2	0	6	7	10	12	0	0	0	5	5	6	5				6.7255E4					7.4311E3	2.1459E4	6.6532E4								9	4	2	3	1	20	2	1	0
180	333	P29557|IF4E1_WHEAT	136.3	12	6	0	0	0	0	0	0	0	0	0	0	0	0	0	0	0	0	0	4.7187E4																		2	2	1	0	0	0	0	0	0
171	245	Q03389|IF4E2_WHEAT	158.92	17	0	0	7	0	0	0	0	0	0	0	0	0	0	0	0	0	0	0			5.8839E4																3	3	0	0	2	0	0	0	0
146	187	Q9FIB6|PS12A_ARATH	162.43	8	0	0	0	5	0	0	0	0	0	2	0	0	0	0	0	2	2	0				5.9342E4						3.2254E3						5.1767E3	2.2604E3		4	4	0	0	0	3	0	0	0
231	189	Q9SIV2|PSD2A_ARATH	132.76	4	0	0	0	0	0	0	0	0	2	0	0	0	0	0	0	0	0	0									2.3467E4										3	3	0	0	0	0	0	0	0
107	320	Q9SEI3|PS10A_ARATH	125.79	6	0	0	3	3	0	0	0	0	0	3	6	0	0	0	0	3	0	0											1.7245E4								2	1	0	0	1	5	0	0	0
89	83	Q9SEI4|PRS6B_ARATH	202.66	17	0	0	5	12	0	0	0	0	0	3	3	0	0	0	0	3	0	0			4.756E3	2.9595E5															6	5	0	0	2	12	0	0	0
109	164	Q94BQ2|PRS8B_ARATH	149.17	10	0	0	3	3	0	0	0	0	0	3	10	0	0	0	0	3	0	0											2.8735E4								3	2	0	0	1	5	0	0	0
107	318	Q9MAK9|PS10B_ARATH	125.79	6	0	0	3	3	0	0	0	0	0	3	6	0	0	0	0	3	0	0											1.7245E4								2	1	0	0	1	5	0	0	0
14	6	P22953|HS701_ARATH	312.12	29	2	0	11	7	0	0	20	0	0	0	3	0	0	0	2	0	0	3				1.2951E4			1.3887E4												18	1	1	0	6	4	0	0	26
129	135	Q9S7C0|HSP7O_ARATH	180.05	6	0	0	0	0	0	1	0	0	3	0	0	0	0	0	0	0	0	5						0			6.7419E3									7.1132E4	5	5	0	0	0	0	0	1	0
129	134	F4HQD4|HSP7P_ARATH	180.05	6	0	0	0	0	0	1	0	0	3	0	0	0	0	0	0	0	0	5						0			6.7419E3									7.1132E4	5	5	0	0	0	0	0	1	0
21	11	O65719|HSP7C_ARATH	278.51	29	2	0	13	4	4	0	22	0	0	0	5	4	0	0	4	0	0	3			0				2.4536E4				0								15	1	1	0	7	3	1	0	20
50	348	Q8H159|UBQ10_ARATH	193.91	10	7	0	10	0	0	2	2	2	2	0	0	0	0	0	2	0	0	0	3.0058E5		3.5184E5			1.1856E4	1.0295E4	2.6119E4	2.1486E3						6.2293E3				5	5	6	0	6	0	0	2	3
50	344	P0CH33|UBQ11_ARATH	193.91	21	14	0	21	0	0	4	4	4	4	0	0	0	0	0	4	0	0	0	3.0058E5		3.5184E5			1.1856E4	1.0295E4	2.6119E4	2.1486E3						6.2293E3				5	5	6	0	6	0	0	2	3
50	290	Q3E7K8|UBQ12_ARATH	193.91	20	13	0	20	0	0	4	4	4	4	0	0	0	0	0	4	0	0	0	3.0058E5		3.5184E5			1.1856E4	1.0295E4	2.6119E4	2.1486E3						6.2293E3				5	5	6	0	6	0	0	2	3
50	345	Q3E7T8|UBQ14_ARATH	193.91	15	10	0	15	0	0	3	3	3	3	0	0	0	0	0	3	0	0	0	3.0058E5		3.5184E5			1.1856E4	1.0295E4	2.6119E4	2.1486E3						6.2293E3				5	5	6	0	6	0	0	2	3
50	346	Q1EC66|UBQ3_ARATH	193.91	15	10	0	15	0	0	3	3	3	3	0	0	0	0	0	3	0	0	0	3.0058E5		3.5184E5			1.1856E4	1.0295E4	2.6119E4	2.1486E3						6.2293E3				5	5	6	0	6	0	0	2	3
50	347	P0CH32|UBQ4_ARATH	193.91	12	8	0	12	0	0	2	2	2	2	0	0	0	0	0	2	0	0	0	3.0058E5		3.5184E5			1.1856E4	1.0295E4	2.6119E4	2.1486E3						6.2293E3				5	5	6	0	6	0	0	2	3
50	307	Q9FHQ6|UBQ9_ARATH	193.91	15	10	0	15	0	0	3	3	3	3	0	0	0	0	0	3	0	0	0	3.0058E5		3.5184E5			1.1856E4	1.0295E4	2.6119E4	2.1486E3						6.2293E3				5	5	6	0	6	0	0	2	3
234	644	P34066|PSA1A_ARATH	65.22	4	0	4	0	0	0	0	0	4	0	0	0	0	0	0	0	0	0	0		1.1525E5						8.1574E4											1	1	0	2	0	0	0	0	0
234	748	O23712|PSA1B_ARATH	65.22	4	0	4	0	0	0	0	0	4	0	0	0	0	0	0	0	0	0	0		1.1525E5						8.1574E4											1	1	0	2	0	0	0	0	0
138	255	O81149|PSA5A_ARATH	166.54	19	12	0	0	0	0	0	0	0	0	0	0	0	0	0	0	0	0	0	2.899E4																		4	4	2	0	0	0	0	0	0
138	259	Q42134|PSA5B_ARATH	166.54	19	12	0	0	0	0	0	0	0	0	0	0	0	0	0	0	0	0	0	2.899E4																		4	4	2	0	0	0	0	0	0
119	359	P30186|PSA7A_ARATH	124.92	8	0	0	8	0	0	0	0	0	0	0	0	0	0	0	0	0	0	0			3.3492E5																2	2	0	0	9	0	0	0	0
119	329	O24616|PSA7B_ARATH	124.92	8	0	0	8	0	0	0	0	0	0	0	0	0	0	0	0	0	0	0			3.3492E5																2	2	0	0	9	0	0	0	0
315	1669	O23714|PSB2A_ARATH	53.4	4	4	0	0	0	0	0	0	0	0	0	0	0	0	0	0	0	0	0	4.6192E4																		1	1	1	0	0	0	0	0	0
315	2212	O24633|PSB2B_ARATH	53.4	5	5	0	0	0	0	0	0	0	0	0	0	0	0	0	0	0	0	0	4.6192E4																		1	1	1	0	0	0	0	0	0
159	1337	Q8LD27|PSB6_ARATH	76.74	4	4	0	0	0	0	0	0	0	0	0	0	0	0	0	0	0	0	0	2.6552E5																		1	1	3	0	0	0	0	0	0
50	327	P59271|R27AA_ARATH	193.91	30	20	0	30	0	0	6	6	6	6	0	0	0	0	0	6	0	0	0	3.0058E5		3.5184E5			1.1856E4	1.0295E4	2.6119E4	2.1486E3						6.2293E3				5	5	6	0	6	0	0	2	3
50	328	P59232|R27AB_ARATH	193.91	30	20	0	30	0	0	6	6	6	6	0	0	0	0	0	6	0	0	0	3.0058E5		3.5184E5			1.1856E4	1.0295E4	2.6119E4	2.1486E3						6.2293E3				5	5	6	0	6	0	0	2	3
50	322	P59233|R27AC_ARATH	193.91	30	20	0	30	0	0	6	6	6	6	0	0	0	0	0	6	0	0	0	3.0058E5		3.5184E5			1.1856E4	1.0295E4	2.6119E4	2.1486E3						6.2293E3				5	5	6	0	6	0	0	2	3
50	358	B9DHA6|RL40A_ARATH	193.91	37	24	0	37	0	0	7	7	7	7	0	0	0	0	0	7	0	0	0	3.0058E5		3.5184E5			1.1856E4	1.0295E4	2.6119E4	2.1486E3						6.2293E3				5	5	6	0	6	0	0	2	3
50	357	Q42202|RL40B_ARATH	193.91	37	24	0	37	0	0	7	7	7	7	0	0	0	0	0	7	0	0	0	3.0058E5		3.5184E5			1.1856E4	1.0295E4	2.6119E4	2.1486E3						6.2293E3				5	5	6	0	6	0	0	2	3
167	79	P20973|UBE11_WHEAT	179.64	11	0	0	0	0	0	0	0	0	5	0	0	0	0	0	0	0	0	3									3.0181E3									1.5667E4	7	7	0	0	0	0	0	0	0
167	82	P31251|UBE12_WHEAT	179.64	11	0	0	0	0	0	0	0	0	5	0	0	0	0	0	0	0	0	3									3.0181E3									1.5667E4	7	7	0	0	0	0	0	0	0
50	303	Q9SHE7|RUB1_ARATH	193.91	30	20	0	30	0	0	6	6	6	6	0	0	0	0	0	6	0	0	0	3.0058E5		3.5184E5			1.1856E4	1.0295E4	2.6119E4	2.1486E3						6.2293E3				5	5	6	0	6	0	0	2	3
50	302	Q8RUC6|RUB2_ARATH	193.91	31	20	0	31	0	0	6	6	6	6	0	0	0	0	0	6	0	0	0	3.0058E5		3.5184E5			1.1856E4	1.0295E4	2.6119E4	2.1486E3						6.2293E3				5	5	6	0	6	0	0	2	3
143	739	O24456|GBLPA_ARATH	97.82	3	0	3	0	0	0	0	0	3	0	0	0	0	0	0	0	0	0	0		4.3162E5						2.6694E5											1	1	0	5	0	0	0	0	0
143	451	Q9C4Z6|GPLPB_ARATH	97.82	3	0	3	0	0	0	0	0	3	0	0	0	0	0	0	0	0	0	0		4.3162E5						2.6694E5											1	1	0	5	0	0	0	0	0
143	604	Q9LV28|GPLPC_ARATH	97.82	3	0	3	0	0	0	0	0	3	0	0	0	0	0	0	0	0	0	0		4.3162E5						2.6694E5											1	1	0	5	0	0	0	0	0
332	1617	Q9XFR5|SR30_ARATH	53.05	4	0	0	0	0	0	0	0	4	0	0	0	0	0	0	0	0	0	0								1.0698E4											1	1	0	0	0	0	0	0	0
357	2086	Q9FN03|UVR8_ARATH	76.75	2	0	0	0	2	0	0	0	0	0	0	0	0	0	0	0	0	0	0				5.4076E4															1	1	0	0	0	1	0	0	0
97	107	Q6W8Q2|REHY_WHEAT	195.59	27	22	0	0	0	0	0	0	0	0	0	0	0	0	0	0	0	0	0	2.801E5																		7	7	13	0	0	0	0	0	0
87	113	P25696|ENO2_ARATH	206.51	22	0	0	0	0	17	0	0	0	0	0	8	0	0	0	19	0	0	0					2.5497E5						1.0086E5				4.1877E5				7	7	0	0	0	0	5	0	0
358	2236	Q8GYX0|MOB1B_ARATH	55.52	4	4	0	0	0	0	0	0	0	0	0	0	0	0	0	0	0	0	0	1.655E4																		1	1	1	0	0	0	0	0	0
160	85	Q03387|IF4G1_WHEAT	179.4	7	1	1	0	0	0	0	0	1	0	0	0	0	0	0	0	0	0	0	4.1618E4	6.6982E3						1.4259E4											6	6	2	1	0	0	0	0	0
49	116	Q9FWA3|6PGD2_ARATH	224.71	12	0	0	0	8	0	0	0	0	0	2	0	0	0	0	0	2	2	0				1.2346E6															6	3	0	0	0	19	0	0	0
108	283	Q9SID0|SCRK1_ARATH	128.24	7	4	7	0	0	0	0	0	7	0	0	0	0	0	0	0	0	0	0	5.361E3	1.1821E5						1.3882E5											2	1	1	5	0	0	0	0	0
150	253	P49040|SUS1_ARATH	144.98	4	0	0	0	0	0	0	3	0	0	0	0	0	0	0	0	0	0	0							8.6881E3												4	3	0	0	0	0	0	0	2
88	366	Q9LHG9|NACA1_ARATH	176.82	15	15	0	15	0	0	0	0	0	0	0	0	0	0	0	0	0	0	0	1.2823E5		1.3978E5																2	2	4	0	4	0	0	0	0
243	874	O24653|GDI2_ARATH	83.63	2	0	0	0	2	0	0	0	0	0	0	0	0	0	0	0	0	0	0				1.6579E5															1	1	0	0	0	2	0	0	0
88	363	Q6ICZ8|NACA3_ARATH	176.82	15	15	0	15	0	0	0	0	0	0	0	0	0	0	0	0	0	0	0	1.2823E5		1.3978E5																2	2	4	0	4	0	0	0	0
5	8	P32112|SAHH_WHEAT	353.76	45	0	6	6	10	28	0	0	3	0	0	0	11	0	0	42	0	0	0		8.415E4	2.999E4	3.1433E5	7.567E5			1.7549E4				7.423E4			1.6954E6				22	22	0	4	3	9	49	0	0
Cytoskeleton
Protein Group	Protein ID	Accession	-10lgP	Coverage (%)	Coverage (%)																		Area																				#Spec
					Control-1	Control-2	Control-3	Control-4	Control-5	Control-6	Control-7	Control-8	Control-9	Control-10	Control-11	Control-12	Control-13	Control-14	Control-15	Control-16	Control-17	Control-18	Control-1	Control-2	Control-3	Control-4	Control-5	Control-6	Control-7	Control-8	Control-9	Control-10	Control-11	Control-12	Control-13	Control-14	Control-15	Control-16	Control-17	Control-18	#Peptides	#Unique	Control-1	Control-2	Control-3	Control-4	Control-5	Control-6	Control-7
26	26	P53496|ACT11_ARATH	296.5	37	8	22	8	11	0	0	8	11	0	0	8	0	0	0	0	0	0	0		7.2571E4																	12	1	3	20	5	3	0	0	1
12	32	P53497|ACT12_ARATH	303.54	37	11	22	10	11	0	3	8	14	0	0	8	0	0	0	0	0	0	0	7.3259E4	2.4194E5	1.366E5			2.7279E3		7.9906E4											12	1	5	18	7	3	0	1	1
12	31	P53494|ACT4_ARATH	303.54	37	11	22	10	11	0	3	8	14	0	0	8	0	0	0	0	0	0	0	7.3259E4	2.4194E5	1.366E5			2.7279E3		7.9906E4											12	1	5	18	7	3	0	1	1
33	37	P53492|ACT7_ARATH	287.51	38	8	16	8	11	0	0	8	10	0	0	8	0	0	0	0	0	0	0								2.9285E4											12	2	3	16	5	3	0	0	1
Endoplasmic reticulum
Protein Group	Protein ID	Accession	-10lgP	Coverage (%)	Coverage (%)																		Area																				#Spec
					Control-1	Control-2	Control-3	Control-4	Control-5	Control-6	Control-7	Control-8	Control-9	Control-10	Control-11	Control-12	Control-13	Control-14	Control-15	Control-16	Control-17	Control-18	Control-1	Control-2	Control-3	Control-4	Control-5	Control-6	Control-7	Control-8	Control-9	Control-10	Control-11	Control-12	Control-13	Control-14	Control-15	Control-16	Control-17	Control-18	#Peptides	#Unique	Control-1	Control-2	Control-3	Control-4	Control-5	Control-6	Control-7
189	1247	Q38858|CALR2_ARATH	117.89	7	0	0	0	2	2	0	0	0	0	0	0	0	0	0	7	0	0	0				1.1871E5	2.3905E3										3.5387E3				3	3	0	0	0	1	2	0	0
264	271	Q2QMN7|UAH_ORYSJ	100.23	2	0	0	0	2	0	0	0	0	0	0	0	0	0	0	0	0	0	0				3.0353E4															1	1	0	0	0	1	0	0	0
202	295	O04834|SAR1A_ARATH	134.57	13	6	0	0	0	0	0	0	0	0	0	0	0	0	0	0	0	0	0	4.8456E4																		2	2	1	0	0	0	0	0	0
52	49	Q39043|BIP2_ARATH	252.01	14	0	0	6	0	0	0	7	0	0	0	6	0	0	0	0	0	2	3			4.2874E4				4.951E4				1.4206E5						5.2911E2		11	9	0	0	3	0	0	0	8
Extracellular
Protein Group	Protein ID	Accession	-10lgP	Coverage (%)	Coverage (%)																		Area																				#Spec
					Control-1	Control-2	Control-3	Control-4	Control-5	Control-6	Control-7	Control-8	Control-9	Control-10	Control-11	Control-12	Control-13	Control-14	Control-15	Control-16	Control-17	Control-18	Control-1	Control-2	Control-3	Control-4	Control-5	Control-6	Control-7	Control-8	Control-9	Control-10	Control-11	Control-12	Control-13	Control-14	Control-15	Control-16	Control-17	Control-18	#Peptides	#Unique	Control-1	Control-2	Control-3	Control-4	Control-5	Control-6	Control-7
108	312	Q9LNE4|SCRK3_ARATH	128.24	6	4	6	0	0	0	0	0	6	0	0	0	0	0	0	0	0	0	0	5.361E3	1.1821E5						1.3882E5											2	1	1	5	0	0	0	0	0
108	364	Q9LNE3|SCRK2_ARATH	128.24	7	4	7	0	0	0	0	0	7	0	0	0	0	0	0	0	0	0	0	5.361E3	1.1821E5						1.3882E5											2	1	1	5	0	0	0	0	0
Golgi apparatus
Protein Group	Protein ID	Accession	-10lgP	Coverage (%)	Coverage (%)																		Area																				#Spec
					Control-1	Control-2	Control-3	Control-4	Control-5	Control-6	Control-7	Control-8	Control-9	Control-10	Control-11	Control-12	Control-13	Control-14	Control-15	Control-16	Control-17	Control-18	Control-1	Control-2	Control-3	Control-4	Control-5	Control-6	Control-7	Control-8	Control-9	Control-10	Control-11	Control-12	Control-13	Control-14	Control-15	Control-16	Control-17	Control-18	#Peptides	#Unique	Control-1	Control-2	Control-3	Control-4	Control-5	Control-6	Control-7
252	254	Q9SV21|COPB1_ARATH	103.22	3	0	0	0	0	0	0	0	0	0	0	0	1	0	0	0	0	0	0												7.78E3							3	3	0	0	0	0	0	0	0
252	256	Q9SV20|COPB2_ARATH	103.22	3	0	0	0	0	0	0	0	0	0	0	0	1	0	0	0	0	0	0												7.78E3							3	3	0	0	0	0	0	0	0
237	198	Q0WW26|COPG_ARATH	110.72	3	0	0	0	0	0	0	0	0	1	0	0	0	0	0	0	0	0	0									9.94E3										2	2	0	0	0	0	0	0	0
88	363	Q6ICZ8|NACA3_ARATH	176.82	15	15	0	15	0	0	0	0	0	0	0	0	0	0	0	0	0	0	0	1.2823E5		1.3978E5																2	2	4	0	4	0	0	0	0
161	130	Q9LZI2|UXS2_ARATH	165.22	13	0	7	0	0	0	0	0	4	0	0	0	0	0	0	0	0	0	0		2.4259E5						3.7596E4											6	5	0	4	0	0	0	0	0
161	121	Q8S8T4|UXS4_ARATH	165.22	13	0	7	0	0	0	0	0	4	0	0	0	0	0	0	0	0	0	0		2.4259E5						3.7596E4											6	5	0	4	0	0	0	0	0
263	1222	O22715|AP1M2_ARATH	74	2	0	0	0	2	0	0	0	0	0	0	0	0	0	0	0	0	0	0				2.3981E4															1	1	0	0	0	1	0	0	0
63	181	Q9LNW1|RAA2B_ARATH	193.3	22	17	0	10	0	0	0	0	0	0	0	0	0	0	0	0	0	0	0	1.812E4																		5	1	11	0	3	0	0	0	0
63	163	Q96283|RAA2C_ARATH	193.3	22	17	0	10	0	0	0	0	0	0	0	0	0	0	0	0	0	0	0	1.812E4																		5	1	11	0	3	0	0	0	0
202	295	O04834|SAR1A_ARATH	134.57	13	6	0	0	0	0	0	0	0	0	0	0	0	0	0	0	0	0	0	4.8456E4																		2	2	1	0	0	0	0	0	0
74	109	P28186|RAE1C_ARATH	189.15	25	25	0	0	0	0	0	0	0	0	0	0	0	0	0	0	0	0	0	2.7039E5																		5	3	12	0	0	0	0	0	0
74	179	Q9LZD4|RAE1D_ARATH	189.15	25	25	0	0	0	0	0	0	0	0	0	0	0	0	0	0	0	0	0	2.7039E5																		5	3	12	0	0	0	0	0	0
Membrane
Protein Group	Protein ID	Accession	-10lgP	Coverage (%)	Coverage (%)																		Area																				#Spec
					Control-1	Control-2	Control-3	Control-4	Control-5	Control-6	Control-7	Control-8	Control-9	Control-10	Control-11	Control-12	Control-13	Control-14	Control-15	Control-16	Control-17	Control-18	Control-1	Control-2	Control-3	Control-4	Control-5	Control-6	Control-7	Control-8	Control-9	Control-10	Control-11	Control-12	Control-13	Control-14	Control-15	Control-16	Control-17	Control-18	#Peptides	#Unique	Control-1	Control-2	Control-3	Control-4	Control-5	Control-6	Control-7
287	403	Q9SSQ9|PLDA2_ARATH	63.98	2	0	0	0	0	0	0	2	0	0	0	0	0	0	0	0	0	0	0							8.2117E3												1	1	0	0	0	0	0	0	1
116	627	Q42564|APX3_ARATH	91.83	3	3	0	3	0	0	0	0	0	0	0	0	0	0	0	0	0	0	0	3.6443E4		0																1	1	2	0	1	0	0	0	0
116	1633	Q7XZP5|APX5_ARATH	91.83	3	3	0	3	0	0	0	0	0	0	0	0	0	0	0	0	0	0	0	3.6443E4		0																1	1	2	0	1	0	0	0	0
235	405	P46524|CO410_WHEAT	78.3	12	7	0	0	0	0	0	0	0	0	0	0	0	0	0	0	0	0	0	1.2826E4																		2	2	1	0	0	0	0	0	0
184	133	P93596|CP51_WHEAT	145.7	12	0	0	0	6	3	0	0	0	0	0	0	5	0	0	3	0	0	0				1.8436E4	1.0872E4							2.0048E4			2.9448E4				5	5	0	0	0	2	1	0	0
155	144	Q9LS94|RAG3F_ARATH	138.85	19	14	0	0	0	0	0	0	0	0	0	0	0	0	0	0	0	0	0	5.9702E4																		4	3	4	0	0	0	0	0	0
Mitochondrion
Protein Group	Protein ID	Accession	-10lgP	Coverage (%)	Coverage (%)																		Area																				#Spec
					Control-1	Control-2	Control-3	Control-4	Control-5	Control-6	Control-7	Control-8	Control-9	Control-10	Control-11	Control-12	Control-13	Control-14	Control-15	Control-16	Control-17	Control-18	Control-1	Control-2	Control-3	Control-4	Control-5	Control-6	Control-7	Control-8	Control-9	Control-10	Control-11	Control-12	Control-13	Control-14	Control-15	Control-16	Control-17	Control-18	#Peptides	#Unique	Control-1	Control-2	Control-3	Control-4	Control-5	Control-6	Control-7
253	646	Q42592|APXS_ARATH	91.74	2	0	0	2	0	0	0	0	0	0	0	0	0	0	0	0	0	0	0			1.9438E4																1	1	0	0	1	0	0	0	0
140	200	Q42669|ACOHC_CUCMC	165.66	6	0	0	0	0	0	0	0	0	4	0	0	0	0	0	0	0	0	4																		1.0483E4	3	1	0	0	0	0	0	0	0
76	39	P38076|CYSK_WHEAT	281.82	50	4	35	0	0	0	0	0	23	0	0	0	0	0	0	0	0	0	0		5.3416E5						3.3895E5											12	11	1	23	0	0	0	0	0
126	73	Q42560|ACO1_ARATH	197	10	0	0	0	0	0	1	0	0	4	0	0	0	0	0	0	0	0	6																		3.8337E4	8	4	0	0	0	0	0	2	0
100	68	Q9SIB9|ACO3M_ARATH	228.68	10	0	0	0	0	0	2	0	0	8	0	0	0	0	0	0	0	0	5						0			4.1103E4									5.1377E4	7	2	0	0	0	0	0	3	0
62	294	P48491|TPIS_ARATH	129.02	7	7	0	0	0	0	0	0	0	0	0	0	0	0	0	0	0	0	0	1.1516E6																		2	2	9	0	0	0	0	0	0
266	529	Q39243|TRXB1_ARATH	68.98	4	0	0	0	0	0	0	0	4	0	0	0	0	0	0	0	0	0	0								5.4626E4											1	1	0	0	0	0	0	0	0
266	613	Q39242|TRXB2_ARATH	68.98	4	0	0	0	0	0	0	0	4	0	0	0	0	0	0	0	0	0	0								5.4626E4											1	1	0	0	0	0	0	0	0
185	180	Q9ZPS3|DCE4_ARATH	130.17	12	0	0	0	0	6	0	0	0	0	0	0	2	0	0	6	0	0	0					0							0			1.5014E4				4	4	0	0	0	0	2	0	0
130	571	O48661|SPDS2_ARATH	121.02	8	0	4	0	0	0	0	0	8	0	0	0	0	0	0	0	0	0	0		2.0073E5						2.4878E5											2	2	0	7	0	0	0	0	0
87	113	P25696|ENO2_ARATH	206.51	22	0	0	0	0	17	0	0	0	0	0	8	0	0	0	19	0	0	0					2.5497E5						1.0086E5				4.1877E5				7	7	0	0	0	0	5	0	0
196	265	Q9LDV4|ALAT2_ARATH	150.48	6	0	0	0	4	2	0	0	0	0	0	0	0	0	0	2	0	0	0				1.7006E5	2.9583E3										1.7377E3				3	3	0	0	0	4	1	0	0
203	3174	Q94AL9|AGT22_ARATH	67.46	2	0	0	0	2	0	0	0	0	0	0	0	0	0	0	0	0	0	0				5.0802E4															1	1	0	0	0	1	0	0	0
136	167	Q9M1D3|CISY5_ARATH	186.05	12	0	0	0	0	0	0	0	0	0	0	7	0	0	0	0	0	0	0											1.625E5								5	4	0	0	0	0	0	0	0
245	839	Q9FLQ4|ODO2A_ARATH	58.05	2	0	0	0	2	0	0	0	0	0	0	0	0	0	0	0	0	0	0				5.6663E4															1	1	0	0	0	1	0	0	0
245	479	Q8H107|ODO2B_ARATH	58.05	2	0	0	0	2	0	0	0	0	0	0	0	0	0	0	0	0	0	0				5.6663E4															1	1	0	0	0	1	0	0	0
168	213	P93033|FUM1_ARATH	145.56	5	0	0	0	5	0	0	0	0	0	0	0	0	0	0	0	0	0	0				1.6852E5															2	1	0	0	0	6	0	0	0
125	152	Q9ZP06|MDHM1_ARATH	214.12	19	0	11	0	0	0	0	0	4	0	0	0	0	0	0	0	0	0	0		8.0551E5						8.6583E4											7	5	0	10	0	0	0	0	0
205	191	P68538|MI25_WHEAT	100.64	11	7	0	0	0	0	0	0	0	0	0	0	0	0	0	0	0	0	0	1.0501E4																		2	2	1	0	0	0	0	0	0
67	66	P92549|ATPAM_ARATH	218.9	17	4	0	0	0	8	0	0	0	0	0	0	0	0	0	16	0	0	0															1.62E5				8	1	3	0	0	0	11	0	0
29	7	P12862|ATPAM_WHEAT	304.66	41	6	2	0	0	22	0	0	2	0	0	5	0	0	0	38	0	0	0	3.009E4	2.6691E4			2.6616E5			3.679E4			3.7754E4				3.9538E5				17	10	4	1	0	0	26	0	0
58	42	P83483|ATPBM_ARATH	254.58	24	0	0	0	0	14	0	0	0	0	0	0	3	0	0	18	0	0	0					3.7297E5							2.1228E4			7.4016E5				10	10	0	0	0	0	16	0	0
58	43	P83484|ATPBN_ARATH	254.58	24	0	0	0	0	14	0	0	0	0	0	0	3	0	0	18	0	0	0					3.7297E5							2.1228E4			7.4016E5				10	10	0	0	0	0	16	0	0
58	47	Q9C5A9|ATPBO_ARATH	254.58	24	0	0	0	0	14	0	0	0	0	0	0	3	0	0	18	0	0	0					3.7297E5							2.1228E4			7.4016E5				10	10	0	0	0	0	16	0	0
218	337	Q96250|ATPG3_ARATH	112.26	5	0	5	0	0	0	0	0	2	0	0	0	0	0	0	0	0	0	0		8.1925E4						5.8462E4											2	2	0	4	0	0	0	0	0
256	2798	P07747|CYB_WHEAT	73.55	2	0	0	2	0	0	0	0	0	0	0	0	0	0	0	0	0	0	0			2.8127E4																1	1	0	0	1	0	0	0	0
152	395	Q95748|NDUS3_ARATH	126.96	12	12	0	0	0	0	0	0	0	0	0	0	0	0	0	0	0	0	0	2.3376E5																		2	2	5	0	0	0	0	0	0
34	86	P31167|ADT1_ARATH	261.82	23	0	0	19	0	0	0	0	0	0	0	0	0	0	0	0	0	0	0			1.2234E5																11	2	0	0	40	0	0	0	0
24	55	Q41629|ADT1_WHEAT	296.74	39	0	0	36	0	0	0	0	0	0	0	0	0	0	0	0	0	0	0			1.0864E6																15	6	0	0	45	0	0	0	0
94	94	P46274|VDAC1_WHEAT	221.35	28	0	0	23	0	0	0	0	0	0	0	0	0	0	0	0	0	0	0			2.4668E5																7	7	0	0	7	0	0	0	0
208	911	Q9FJX3|VDAC2_ARATH	83.05	4	0	0	4	0	0	0	0	0	0	0	0	0	0	0	0	0	0	0			4.9514E4																1	1	0	0	3	0	0	0	0
201	420	Q9M2Z8|MPCP2_ARATH	102.96	5	0	2	0	0	0	0	0	2	0	0	0	0	0	0	0	0	0	0		4.4366E5						2.1309E4											2	2	0	3	0	0	0	0	0
Nucleus
Protein Group	Protein ID	Accession	-10lgP	Coverage (%)	Coverage (%)																		Area																				#Spec
					Control-1	Control-2	Control-3	Control-4	Control-5	Control-6	Control-7	Control-8	Control-9	Control-10	Control-11	Control-12	Control-13	Control-14	Control-15	Control-16	Control-17	Control-18	Control-1	Control-2	Control-3	Control-4	Control-5	Control-6	Control-7	Control-8	Control-9	Control-10	Control-11	Control-12	Control-13	Control-14	Control-15	Control-16	Control-17	Control-18	#Peptides	#Unique	Control-1	Control-2	Control-3	Control-4	Control-5	Control-6	Control-7
156	229	Q9LQQ4|H2B1_ARATH	145.72	20	7	0	0	0	0	0	0	0	0	0	0	0	0	0	0	0	0	0	4.0169E4																		3	3	1	0	0	0	0	0	0
156	223	P27807|H2B1_WHEAT	145.72	20	7	0	0	0	0	0	0	0	0	0	0	0	0	0	0	0	0	0	4.0169E4																		3	3	1	0	0	0	0	0	0
156	296	Q9FFC0|H2B10_ARATH	145.72	21	8	0	0	0	0	0	0	0	0	0	0	0	0	0	0	0	0	0	4.0169E4																		3	3	1	0	0	0	0	0	0
156	300	P40283|H2B11_ARATH	145.72	20	7	0	0	0	0	0	0	0	0	0	0	0	0	0	0	0	0	0	4.0169E4																		3	3	1	0	0	0	0	0	0
156	203	P05621|H2B2_WHEAT	145.72	20	7	0	0	0	0	0	0	0	0	0	0	0	0	0	0	0	0	0	4.0169E4																		3	3	1	0	0	0	0	0	0
156	278	Q9SI96|H2B3_ARATH	145.72	20	7	0	0	0	0	0	0	0	0	0	0	0	0	0	0	0	0	0	4.0169E4																		3	3	1	0	0	0	0	0	0
156	240	Q43217|H2B3_WHEAT	145.72	22	8	0	0	0	0	0	0	0	0	0	0	0	0	0	0	0	0	0	4.0169E4																		3	3	1	0	0	0	0	0	0
156	284	Q43215|H2B4_WHEAT	145.72	22	8	0	0	0	0	0	0	0	0	0	0	0	0	0	0	0	0	0	4.0169E4																		3	3	1	0	0	0	0	0	0
156	196	Q43216|H2B5_WHEAT	145.72	22	8	0	0	0	0	0	0	0	0	0	0	0	0	0	0	0	0	0	4.0169E4																		3	3	1	0	0	0	0	0	0
156	313	O23629|H2B6_ARATH	145.72	20	7	0	0	0	0	0	0	0	0	0	0	0	0	0	0	0	0	0	4.0169E4																		3	3	1	0	0	0	0	0	0
156	273	Q9LZT0|H2B7_ARATH	145.72	21	8	0	0	0	0	0	0	0	0	0	0	0	0	0	0	0	0	0	4.0169E4																		3	3	1	0	0	0	0	0	0
102	297	P59259|H4_ARATH	139.66	31	19	0	10	0	0	0	0	21	0	0	0	0	0	0	0	0	0	0	4.6871E4		1.0439E4					3.3418E4											3	3	4	0	1	0	0	0	0
102	298	P62785|H41_WHEAT	139.66	31	19	0	10	0	0	0	0	21	0	0	0	0	0	0	0	0	0	0	4.6871E4		1.0439E4					3.3418E4											3	3	4	0	1	0	0	0	0
102	293	P62786|H42_WHEAT	139.66	31	19	0	10	0	0	0	0	21	0	0	0	0	0	0	0	0	0	0	4.6871E4		1.0439E4					3.3418E4											3	3	4	0	1	0	0	0	0
22	148	P46077|14334_ARATH	228.62	20	0	4	16	0	0	0	0	0	0	0	0	0	0	0	0	0	0	0			9.7607E5																8	1	0	1	30	0	0	0	0
43	211	P42644|14333_ARATH	211.9	20	0	0	16	0	0	0	0	0	0	0	0	0	0	0	0	0	0	0			2.1434E5																7	1	0	0	23	0	0	0	0
54	162	P25858|G3PC1_ARATH	195.26	20	17	11	9	0	0	0	0	11	0	0	0	0	0	0	0	0	0	4	1.8418E5	4.9165E5	1.6919E5					3.1996E5										1.1785E4	5	5	7	7	6	0	0	0	0
54	141	Q9FX54|G3PC2_ARATH	195.26	20	17	11	9	0	0	0	0	11	0	0	0	0	0	0	0	0	0	4	1.8418E5	4.9165E5	1.6919E5					3.1996E5										1.1785E4	5	5	7	7	6	0	0	0	0
79	25	Q9SCN8|CD48D_ARATH	271.86	20	0	0	0	0	0	5	0	0	11	0	0	0	0	0	0	0	0	7																		1.9993E4	15	1	0	0	0	0	0	5	0
154	220	P48347|14310_ARATH	139.02	10	0	0	6	0	0	0	0	0	0	0	0	0	0	0	0	0	0	0			5.0121E4																3	1	0	0	2	0	0	0	0
16	137	Q96300|14337_ARATH	245.19	26	0	5	22	0	0	0	0	0	0	0	0	0	0	0	0	0	0	0			7.2641E5																10	3	0	1	33	0	0	0	0
7	108	Q9FZE1|UGDH1_ARATH	262.33	18	2	5	5	10	5	2	0	5	2	10	12	0	0	0	5	7	7	5			0	6.6022E5						6.5616E4	2.3896E4					3.3475E3	5.6684E3		8	3	2	3	2	23	2	1	0
8	69	Q9LIA8|UGDH2_ARATH	252.35	21	2	5	2	10	5	2	0	6	7	10	12	0	0	0	5	5	6	5				6.7255E4					7.4311E3	2.1459E4	6.6532E4								9	4	2	3	1	20	2	1	0
180	333	P29557|IF4E1_WHEAT	136.3	12	6	0	0	0	0	0	0	0	0	0	0	0	0	0	0	0	0	0	4.7187E4																		2	2	1	0	0	0	0	0	0
171	245	Q03389|IF4E2_WHEAT	158.92	17	0	0	7	0	0	0	0	0	0	0	0	0	0	0	0	0	0	0			5.8839E4																3	3	0	0	2	0	0	0	0
146	187	Q9FIB6|PS12A_ARATH	162.43	8	0	0	0	5	0	0	0	0	0	2	0	0	0	0	0	2	2	0				5.9342E4						3.2254E3						5.1767E3	2.2604E3		4	4	0	0	0	3	0	0	0
231	189	Q9SIV2|PSD2A_ARATH	132.76	4	0	0	0	0	0	0	0	0	2	0	0	0	0	0	0	0	0	0									2.3467E4										3	3	0	0	0	0	0	0	0
107	320	Q9SEI3|PS10A_ARATH	125.79	6	0	0	3	3	0	0	0	0	0	3	6	0	0	0	0	3	0	0											1.7245E4								2	1	0	0	1	5	0	0	0
89	83	Q9SEI4|PRS6B_ARATH	202.66	17	0	0	5	12	0	0	0	0	0	3	3	0	0	0	0	3	0	0			4.756E3	2.9595E5															6	5	0	0	2	12	0	0	0
109	164	Q94BQ2|PRS8B_ARATH	149.17	10	0	0	3	3	0	0	0	0	0	3	10	0	0	0	0	3	0	0											2.8735E4								3	2	0	0	1	5	0	0	0
107	318	Q9MAK9|PS10B_ARATH	125.79	6	0	0	3	3	0	0	0	0	0	3	6	0	0	0	0	3	0	0											1.7245E4								2	1	0	0	1	5	0	0	0
14	6	P22953|HS701_ARATH	312.12	29	2	0	11	7	0	0	20	0	0	0	3	0	0	0	2	0	0	3				1.2951E4			1.3887E4												18	1	1	0	6	4	0	0	26
129	135	Q9S7C0|HSP7O_ARATH	180.05	6	0	0	0	0	0	1	0	0	3	0	0	0	0	0	0	0	0	5						0			6.7419E3									7.1132E4	5	5	0	0	0	0	0	1	0
129	134	F4HQD4|HSP7P_ARATH	180.05	6	0	0	0	0	0	1	0	0	3	0	0	0	0	0	0	0	0	5						0			6.7419E3									7.1132E4	5	5	0	0	0	0	0	1	0
21	11	O65719|HSP7C_ARATH	278.51	29	2	0	13	4	4	0	22	0	0	0	5	4	0	0	4	0	0	3			0				2.4536E4				0								15	1	1	0	7	3	1	0	20
50	348	Q8H159|UBQ10_ARATH	193.91	10	7	0	10	0	0	2	2	2	2	0	0	0	0	0	2	0	0	0	3.0058E5		3.5184E5			1.1856E4	1.0295E4	2.6119E4	2.1486E3						6.2293E3				5	5	6	0	6	0	0	2	3
50	344	P0CH33|UBQ11_ARATH	193.91	21	14	0	21	0	0	4	4	4	4	0	0	0	0	0	4	0	0	0	3.0058E5		3.5184E5			1.1856E4	1.0295E4	2.6119E4	2.1486E3						6.2293E3				5	5	6	0	6	0	0	2	3
50	290	Q3E7K8|UBQ12_ARATH	193.91	20	13	0	20	0	0	4	4	4	4	0	0	0	0	0	4	0	0	0	3.0058E5		3.5184E5			1.1856E4	1.0295E4	2.6119E4	2.1486E3						6.2293E3				5	5	6	0	6	0	0	2	3
50	345	Q3E7T8|UBQ14_ARATH	193.91	15	10	0	15	0	0	3	3	3	3	0	0	0	0	0	3	0	0	0	3.0058E5		3.5184E5			1.1856E4	1.0295E4	2.6119E4	2.1486E3						6.2293E3				5	5	6	0	6	0	0	2	3
50	346	Q1EC66|UBQ3_ARATH	193.91	15	10	0	15	0	0	3	3	3	3	0	0	0	0	0	3	0	0	0	3.0058E5		3.5184E5			1.1856E4	1.0295E4	2.6119E4	2.1486E3						6.2293E3				5	5	6	0	6	0	0	2	3
50	347	P0CH32|UBQ4_ARATH	193.91	12	8	0	12	0	0	2	2	2	2	0	0	0	0	0	2	0	0	0	3.0058E5		3.5184E5			1.1856E4	1.0295E4	2.6119E4	2.1486E3						6.2293E3				5	5	6	0	6	0	0	2	3
50	307	Q9FHQ6|UBQ9_ARATH	193.91	15	10	0	15	0	0	3	3	3	3	0	0	0	0	0	3	0	0	0	3.0058E5		3.5184E5			1.1856E4	1.0295E4	2.6119E4	2.1486E3						6.2293E3				5	5	6	0	6	0	0	2	3
234	644	P34066|PSA1A_ARATH	65.22	4	0	4	0	0	0	0	0	4	0	0	0	0	0	0	0	0	0	0		1.1525E5						8.1574E4											1	1	0	2	0	0	0	0	0
234	748	O23712|PSA1B_ARATH	65.22	4	0	4	0	0	0	0	0	4	0	0	0	0	0	0	0	0	0	0		1.1525E5						8.1574E4											1	1	0	2	0	0	0	0	0
138	255	O81149|PSA5A_ARATH	166.54	19	12	0	0	0	0	0	0	0	0	0	0	0	0	0	0	0	0	0	2.899E4																		4	4	2	0	0	0	0	0	0
138	259	Q42134|PSA5B_ARATH	166.54	19	12	0	0	0	0	0	0	0	0	0	0	0	0	0	0	0	0	0	2.899E4																		4	4	2	0	0	0	0	0	0
119	359	P30186|PSA7A_ARATH	124.92	8	0	0	8	0	0	0	0	0	0	0	0	0	0	0	0	0	0	0			3.3492E5																2	2	0	0	9	0	0	0	0
119	329	O24616|PSA7B_ARATH	124.92	8	0	0	8	0	0	0	0	0	0	0	0	0	0	0	0	0	0	0			3.3492E5																2	2	0	0	9	0	0	0	0
315	1669	O23714|PSB2A_ARATH	53.4	4	4	0	0	0	0	0	0	0	0	0	0	0	0	0	0	0	0	0	4.6192E4																		1	1	1	0	0	0	0	0	0
315	2212	O24633|PSB2B_ARATH	53.4	5	5	0	0	0	0	0	0	0	0	0	0	0	0	0	0	0	0	0	4.6192E4																		1	1	1	0	0	0	0	0	0
159	1337	Q8LD27|PSB6_ARATH	76.74	4	4	0	0	0	0	0	0	0	0	0	0	0	0	0	0	0	0	0	2.6552E5																		1	1	3	0	0	0	0	0	0
50	327	P59271|R27AA_ARATH	193.91	30	20	0	30	0	0	6	6	6	6	0	0	0	0	0	6	0	0	0	3.0058E5		3.5184E5			1.1856E4	1.0295E4	2.6119E4	2.1486E3						6.2293E3				5	5	6	0	6	0	0	2	3
50	328	P59232|R27AB_ARATH	193.91	30	20	0	30	0	0	6	6	6	6	0	0	0	0	0	6	0	0	0	3.0058E5		3.5184E5			1.1856E4	1.0295E4	2.6119E4	2.1486E3						6.2293E3				5	5	6	0	6	0	0	2	3
50	322	P59233|R27AC_ARATH	193.91	30	20	0	30	0	0	6	6	6	6	0	0	0	0	0	6	0	0	0	3.0058E5		3.5184E5			1.1856E4	1.0295E4	2.6119E4	2.1486E3						6.2293E3				5	5	6	0	6	0	0	2	3
50	358	B9DHA6|RL40A_ARATH	193.91	37	24	0	37	0	0	7	7	7	7	0	0	0	0	0	7	0	0	0	3.0058E5		3.5184E5			1.1856E4	1.0295E4	2.6119E4	2.1486E3						6.2293E3				5	5	6	0	6	0	0	2	3
50	357	Q42202|RL40B_ARATH	193.91	37	24	0	37	0	0	7	7	7	7	0	0	0	0	0	7	0	0	0	3.0058E5		3.5184E5			1.1856E4	1.0295E4	2.6119E4	2.1486E3						6.2293E3				5	5	6	0	6	0	0	2	3
167	79	P20973|UBE11_WHEAT	179.64	11	0	0	0	0	0	0	0	0	5	0	0	0	0	0	0	0	0	3									3.0181E3									1.5667E4	7	7	0	0	0	0	0	0	0
167	82	P31251|UBE12_WHEAT	179.64	11	0	0	0	0	0	0	0	0	5	0	0	0	0	0	0	0	0	3									3.0181E3									1.5667E4	7	7	0	0	0	0	0	0	0
50	303	Q9SHE7|RUB1_ARATH	193.91	30	20	0	30	0	0	6	6	6	6	0	0	0	0	0	6	0	0	0	3.0058E5		3.5184E5			1.1856E4	1.0295E4	2.6119E4	2.1486E3						6.2293E3				5	5	6	0	6	0	0	2	3
50	302	Q8RUC6|RUB2_ARATH	193.91	31	20	0	31	0	0	6	6	6	6	0	0	0	0	0	6	0	0	0	3.0058E5		3.5184E5			1.1856E4	1.0295E4	2.6119E4	2.1486E3						6.2293E3				5	5	6	0	6	0	0	2	3
143	739	O24456|GBLPA_ARATH	97.82	3	0	3	0	0	0	0	0	3	0	0	0	0	0	0	0	0	0	0		4.3162E5						2.6694E5											1	1	0	5	0	0	0	0	0
143	451	Q9C4Z6|GPLPB_ARATH	97.82	3	0	3	0	0	0	0	0	3	0	0	0	0	0	0	0	0	0	0		4.3162E5						2.6694E5											1	1	0	5	0	0	0	0	0
143	604	Q9LV28|GPLPC_ARATH	97.82	3	0	3	0	0	0	0	0	3	0	0	0	0	0	0	0	0	0	0		4.3162E5						2.6694E5											1	1	0	5	0	0	0	0	0
332	1617	Q9XFR5|SR30_ARATH	53.05	4	0	0	0	0	0	0	0	4	0	0	0	0	0	0	0	0	0	0								1.0698E4											1	1	0	0	0	0	0	0	0
357	2086	Q9FN03|UVR8_ARATH	76.75	2	0	0	0	2	0	0	0	0	0	0	0	0	0	0	0	0	0	0				5.4076E4															1	1	0	0	0	1	0	0	0
97	107	Q6W8Q2|REHY_WHEAT	195.59	27	22	0	0	0	0	0	0	0	0	0	0	0	0	0	0	0	0	0	2.801E5																		7	7	13	0	0	0	0	0	0
87	113	P25696|ENO2_ARATH	206.51	22	0	0	0	0	17	0	0	0	0	0	8	0	0	0	19	0	0	0					2.5497E5						1.0086E5				4.1877E5				7	7	0	0	0	0	5	0	0
358	2236	Q8GYX0|MOB1B_ARATH	55.52	4	4	0	0	0	0	0	0	0	0	0	0	0	0	0	0	0	0	0	1.655E4																		1	1	1	0	0	0	0	0	0
160	85	Q03387|IF4G1_WHEAT	179.4	7	1	1	0	0	0	0	0	1	0	0	0	0	0	0	0	0	0	0	4.1618E4	6.6982E3						1.4259E4											6	6	2	1	0	0	0	0	0
248	184	Q9ZW35|PCNA2_ARATH	113.47	10	0	6	0	0	0	0	0	4	0	0	0	0	0	0	0	0	0	0		7.8674E4						4.3848E4											3	3	0	2	0	0	0	0	0
248	175	Q9M7Q7|PCNA1_ARATH	113.47	10	0	6	0	0	0	0	0	4	0	0	0	0	0	0	0	0	0	0		7.8674E4						4.3848E4											3	3	0	2	0	0	0	0	0
303	456	O82491|SPT16_ARATH	51.79	1	0	0	0	0	0	0	0	0	0	0	1	0	0	0	0	0	0	0											1.4947E4								1	1	0	0	0	0	0	0	0
127	243	Q96327|EBP1_ARATH	149.83	7	0	7	0	7	0	0	0	5	0	0	0	0	0	0	0	0	0	0		1.6918E5		2.6977E5				1.1794E5											3	3	0	5	0	7	0	0	0
186	285	Q9LT08|PSDE_ARATH	111.79	6	0	6	0	0	0	0	0	6	0	0	0	0	0	0	0	0	0	0		1.8385E5						3.6689E4											2	2	0	4	0	0	0	0	0
123	396	Q9FEF8|FBRL1_ARATH	120	7	0	7	0	0	0	0	0	4	0	0	0	0	0	0	0	0	0	0		1.0954E5						7.6031E4											2	2	0	3	0	0	0	0	0
123	389	Q94AH9|FBRL2_ARATH	120	7	0	7	0	0	0	0	0	3	0	0	0	0	0	0	0	0	0	0		1.0954E5						7.6031E4											2	2	0	3	0	0	0	0	0
332	3854	F4JHI7|SR34B_ARATH	53.05	4	0	0	0	0	0	0	0	4	0	0	0	0	0	0	0	0	0	0								1.0698E4											1	1	0	0	0	0	0	0	0
249	677	Q56XG6|RH15_ARATH	58.29	2	0	0	0	2	0	0	0	0	0	0	0	0	0	0	0	2	0	0				1.2738E5												3.3207E4			1	1	0	0	0	1	0	0	0
249	676	Q9LFN6|RH56_ARATH	58.29	2	0	0	0	2	0	0	0	0	0	0	0	0	0	0	0	2	0	0				1.2738E5												3.3207E4			1	1	0	0	0	1	0	0	0
13	157	P41916|RAN1_ARATH	254.97	36	14	0	27	0	0	0	0	0	0	0	0	0	0	0	0	0	0	0	1.5158E5		1.1767E6																9	9	5	0	15	0	0	0	0
13	158	P41917|RAN2_ARATH	254.97	36	14	0	27	0	0	0	0	0	0	0	0	0	0	0	0	0	0	0	1.5158E5		1.1767E6																9	9	5	0	15	0	0	0	0
13	159	Q8H156|RAN3_ARATH	254.97	36	14	0	27	0	0	0	0	0	0	0	0	0	0	0	0	0	0	0	1.5158E5		1.1767E6																9	9	5	0	15	0	0	0	0
109	156	Q9C5U3|PRS8A_ARATH	149.17	10	0	0	3	3	0	0	0	0	0	3	10	0	0	0	0	3	0	0											2.8735E4								3	2	0	0	1	5	0	0	0
52	49	Q39043|BIP2_ARATH	252.01	14	0	0	6	0	0	0	7	0	0	0	6	0	0	0	0	0	2	3			4.2874E4				4.951E4				1.4206E5						5.2911E2		11	9	0	0	3	0	0	0	8
358	2237	Q9FHI1|MOB1A_ARATH	55.52	4	4	0	0	0	0	0	0	0	0	0	0	0	0	0	0	0	0	0	1.655E4																		1	1	1	0	0	0	0	0	0
231	178	Q6XJG8|PSD2B_ARATH	132.76	4	0	0	0	0	0	0	0	0	2	0	0	0	0	0	0	0	0	0									2.3467E4										3	3	0	0	0	0	0	0	0
Plasma membrane
Protein Group	Protein ID	Accession	-10lgP	Coverage (%)	Coverage (%)																		Area																				#Spec
					Control-1	Control-2	Control-3	Control-4	Control-5	Control-6	Control-7	Control-8	Control-9	Control-10	Control-11	Control-12	Control-13	Control-14	Control-15	Control-16	Control-17	Control-18	Control-1	Control-2	Control-3	Control-4	Control-5	Control-6	Control-7	Control-8	Control-9	Control-10	Control-11	Control-12	Control-13	Control-14	Control-15	Control-16	Control-17	Control-18	#Peptides	#Unique	Control-1	Control-2	Control-3	Control-4	Control-5	Control-6	Control-7
130	571	O48661|SPDS2_ARATH	121.02	8	0	4	0	0	0	0	0	8	0	0	0	0	0	0	0	0	0	0		2.0073E5						2.4878E5											2	2	0	7	0	0	0	0	0
358	2236	Q8GYX0|MOB1B_ARATH	55.52	4	4	0	0	0	0	0	0	0	0	0	0	0	0	0	0	0	0	0	1.655E4																		1	1	1	0	0	0	0	0	0
108	283	Q9SID0|SCRK1_ARATH	128.24	7	4	7	0	0	0	0	0	7	0	0	0	0	0	0	0	0	0	0	5.361E3	1.1821E5						1.3882E5											2	1	1	5	0	0	0	0	0
358	2237	Q9FHI1|MOB1A_ARATH	55.52	4	4	0	0	0	0	0	0	0	0	0	0	0	0	0	0	0	0	0	1.655E4																		1	1	1	0	0	0	0	0	0
231	178	Q6XJG8|PSD2B_ARATH	132.76	4	0	0	0	0	0	0	0	0	2	0	0	0	0	0	0	0	0	0									2.3467E4										3	3	0	0	0	0	0	0	0
258	128	Q9SSB5|PRS7A_ARATH	100.52	7	0	0	0	3	0	0	0	0	0	0	0	0	0	0	0	0	0	0				4.0804E4															2	2	0	0	0	1	0	0	0
170	559	Q8LAY8|P2C69_ARATH	112.37	5	0	5	0	0	0	0	0	5	0	0	0	0	0	0	0	0	0	0		9.8117E4						2.6746E4											2	1	0	6	0	0	0	0	0
178	772	O23016|KCAB_ARATH	76.8	3	0	3	0	0	0	0	0	3	0	0	0	0	0	0	0	0	0	0		1.4284E5						9.3833E4											1	1	0	3	0	0	0	0	0
45	173	Q9FJH0|RAA1F_ARATH	208.9	26	26	0	10	0	0	0	0	0	0	0	0	0	0	0	0	0	0	0	2.6323E5																		6	1	17	0	3	0	0	0	0
45	117	Q9LK99|RAA1G_ARATH	208.9	26	26	0	10	0	0	0	0	0	0	0	0	0	0	0	0	0	0	0	2.6323E5																		6	1	17	0	3	0	0	0	0
69	155	Q1PEX3|RAA1H_ARATH	191.88	22	22	0	10	0	0	0	0	0	0	0	0	0	0	0	0	0	0	0	3.1692E4																		5	1	12	0	3	0	0	0	0
151	147	P92963|RAB1C_ARATH	192.48	35	24	0	0	0	0	0	0	0	0	0	0	0	0	0	0	0	0	0	1.4585E5																		6	6	5	0	0	0	0	0	0
240	905	Q9SJ11|RABG2_ARATH	72.38	5	5	0	0	0	0	0	0	0	0	0	0	0	0	0	0	0	0	0	2.6323E5																		1	1	1	0	0	0	0	0	0
240	948	Q948K8|RAG3A_ARATH	72.38	5	5	0	0	0	0	0	0	0	0	0	0	0	0	0	0	0	0	0	2.6323E5																		1	1	1	0	0	0	0	0	0
182	372	O04157|RAG3B_ARATH	114.58	10	10	0	0	0	0	0	0	0	0	0	0	0	0	0	0	0	0	0	0																		2	1	3	0	0	0	0	0	0
74	109	P28186|RAE1C_ARATH	189.15	25	25	0	0	0	0	0	0	0	0	0	0	0	0	0	0	0	0	0	2.7039E5																		5	3	12	0	0	0	0	0	0
74	179	Q9LZD4|RAE1D_ARATH	189.15	25	25	0	0	0	0	0	0	0	0	0	0	0	0	0	0	0	0	0	2.7039E5																		5	3	12	0	0	0	0	0	0
Plasmodesma
Protein Group	Protein ID	Accession	-10lgP	Coverage (%)	Coverage (%)																		Area																				#Spec
					Control-1	Control-2	Control-3	Control-4	Control-5	Control-6	Control-7	Control-8	Control-9	Control-10	Control-11	Control-12	Control-13	Control-14	Control-15	Control-16	Control-17	Control-18	Control-1	Control-2	Control-3	Control-4	Control-5	Control-6	Control-7	Control-8	Control-9	Control-10	Control-11	Control-12	Control-13	Control-14	Control-15	Control-16	Control-17	Control-18	#Peptides	#Unique	Control-1	Control-2	Control-3	Control-4	Control-5	Control-6	Control-7
108	364	Q9LNE3|SCRK2_ARATH	128.24	7	4	7	0	0	0	0	0	7	0	0	0	0	0	0	0	0	0	0	5.361E3	1.1821E5						1.3882E5											2	1	1	5	0	0	0	0	0
150	253	P49040|SUS1_ARATH	144.98	4	0	0	0	0	0	0	3	0	0	0	0	0	0	0	0	0	0	0							8.6881E3												4	3	0	0	0	0	0	0	2
88	366	Q9LHG9|NACA1_ARATH	176.82	15	15	0	15	0	0	0	0	0	0	0	0	0	0	0	0	0	0	0	1.2823E5		1.3978E5																2	2	4	0	4	0	0	0	0
243	874	O24653|GDI2_ARATH	83.63	2	0	0	0	2	0	0	0	0	0	0	0	0	0	0	0	0	0	0				1.6579E5															1	1	0	0	0	2	0	0	0
88	363	Q6ICZ8|NACA3_ARATH	176.82	15	15	0	15	0	0	0	0	0	0	0	0	0	0	0	0	0	0	0	1.2823E5		1.3978E5																2	2	4	0	4	0	0	0	0
Peroxisome
Protein Group	Protein ID	Accession	-10lgP	Coverage (%)	Coverage (%)																		Area																				#Spec
					Control-1	Control-2	Control-3	Control-4	Control-5	Control-6	Control-7	Control-8	Control-9	Control-10	Control-11	Control-12	Control-13	Control-14	Control-15	Control-16	Control-17	Control-18	Control-1	Control-2	Control-3	Control-4	Control-5	Control-6	Control-7	Control-8	Control-9	Control-10	Control-11	Control-12	Control-13	Control-14	Control-15	Control-16	Control-17	Control-18	#Peptides	#Unique	Control-1	Control-2	Control-3	Control-4	Control-5	Control-6	Control-7
49	116	Q9FWA3|6PGD2_ARATH	224.71	12	0	0	0	8	0	0	0	0	0	2	0	0	0	0	0	2	2	0				1.2346E6															6	3	0	0	0	19	0	0	0
108	283	Q9SID0|SCRK1_ARATH	128.24	7	4	7	0	0	0	0	0	7	0	0	0	0	0	0	0	0	0	0	5.361E3	1.1821E5						1.3882E5											2	1	1	5	0	0	0	0	0
289	643	Q9LR30|GGT1_ARATH	77.35	4	0	0	0	4	0	0	0	0	0	0	0	0	0	0	0	0	0	0				2.1732E4															1	1	0	0	0	1	0	0	0
289	531	Q9S7E9|GGT2_ARATH	77.35	4	0	0	0	4	0	0	0	0	0	0	0	0	0	0	0	0	0	0				2.1732E4															1	1	0	0	0	1	0	0	0
250	448	O82399|MDHX1_ARATH	99.73	7	0	3	0	0	0	0	0	3	0	0	0	0	0	0	0	0	0	0		0						5.9883E3											2	2	0	1	0	0	0	0	0
230	4501	O04420|URIC_ARATH	72.32	3	0	3	0	0	0	0	0	3	0	0	0	0	0	0	0	0	0	0		5.7491E4						0											1	1	0	2	0	0	0	0	0
163	183	Q9SLK0|ICDHX_ARATH	163.36	11	3	5	0	0	0	0	0	0	0	0	6	0	0	0	0	0	0	0											2.1642E4								5	2	1	4	0	0	0	0	0
Secreted
Protein Group	Protein ID	Accession	-10lgP	Coverage (%)	Coverage (%)																		Area																				#Spec
					Control-1	Control-2	Control-3	Control-4	Control-5	Control-6	Control-7	Control-8	Control-9	Control-10	Control-11	Control-12	Control-13	Control-14	Control-15	Control-16	Control-17	Control-18	Control-1	Control-2	Control-3	Control-4	Control-5	Control-6	Control-7	Control-8	Control-9	Control-10	Control-11	Control-12	Control-13	Control-14	Control-15	Control-16	Control-17	Control-18	#Peptides	#Unique	Control-1	Control-2	Control-3	Control-4	Control-5	Control-6	Control-7
25	71	Q05855|PER1_WHEAT	311.61	49	0	0	43	0	0	0	0	10	0	0	0	0	0	0	0	0	0	0			2.0819E6					5.3912E3											12	11	0	0	35	0	0	0	0
103	232	Q8L5C6|XIP1_WHEAT	214.49	15	0	0	7	0	0	0	0	0	0	0	0	0	0	0	0	0	0	0			3.6698E4																5	5	0	0	2	0	0	0	0
Vacuole
Protein Group	Protein ID	Accession	-10lgP	Coverage (%)	Coverage (%)																		Area																				#Spec
					Control-1	Control-2	Control-3	Control-4	Control-5	Control-6	Control-7	Control-8	Control-9	Control-10	Control-11	Control-12	Control-13	Control-14	Control-15	Control-16	Control-17	Control-18	Control-1	Control-2	Control-3	Control-4	Control-5	Control-6	Control-7	Control-8	Control-9	Control-10	Control-11	Control-12	Control-13	Control-14	Control-15	Control-16	Control-17	Control-18	#Peptides	#Unique	Control-1	Control-2	Control-3	Control-4	Control-5	Control-6	Control-7
5	8	P32112|SAHH_WHEAT	353.76	45	0	6	6	10	28	0	0	3	0	0	0	11	0	0	42	0	0	0		8.415E4	2.999E4	3.1433E5	7.567E5			1.7549E4				7.423E4			1.6954E6				22	22	0	4	3	9	49	0	0
155	144	Q9LS94|RAG3F_ARATH	138.85	19	14	0	0	0	0	0	0	0	0	0	0	0	0	0	0	0	0	0	5.9702E4																		4	3	4	0	0	0	0	0	0
150	308	Q9LXL5|SUS4_ARATH	144.98	4	0	0	0	0	0	0	3	0	0	0	0	0	0	0	0	0	0	0							8.6881E3												4	3	0	0	0	0	0	0	2
78	22	P11574|VATB1_ARATH	250.32	43	2	0	0	0	15	0	0	0	0	0	0	6	0	0	27	0	0	0															8.9452E4				13	1	1	0	0	0	5	0	0
77	14	Q9SZN1|VATB2_ARATH	257.09	45	2	0	2	0	17	0	0	0	0	0	0	6	0	0	29	0	0	0			0		1.215E4										3.0488E4				14	2	1	0	1	0	6	0	0
78	19	Q8W4E2|VATB3_ARATH	250.32	43	2	0	0	0	15	0	0	0	0	0	0	6	0	0	27	0	0	0															8.9452E4				13	1	1	0	0	0	5	0	0
Unknown
Protein Group	Protein ID	Accession	-10lgP	Coverage (%)	Coverage (%)																		Area																				#Spec
					Control-1	Control-2	Control-3	Control-4	Control-5	Control-6	Control-7	Control-8	Control-9	Control-10	Control-11	Control-12	Control-13	Control-14	Control-15	Control-16	Control-17	Control-18	Control-1	Control-2	Control-3	Control-4	Control-5	Control-6	Control-7	Control-8	Control-9	Control-10	Control-11	Control-12	Control-13	Control-14	Control-15	Control-16	Control-17	Control-18	#Peptides	#Unique	Control-1	Control-2	Control-3	Control-4	Control-5	Control-6	Control-7
361	2899	Q94AH8|TPS6_ARATH	54.9	1	0	0	0	0	0	0	0	0	0	0	0	0	0	0	0	0	0	1																		2.0093E3	1	1	0	0	0	0	0	0	0
247	126	Q38J50|FOMT2_WHEAT	105.24	7	0	0	0	0	0	0	0	4	0	0	0	0	0	0	0	0	0	0								2.2597E4											2	2	0	0	0	0	0	0	0
295	5428	Q8GYA3|OPRL1_ARATH	66.69	3	0	0	0	0	0	0	0	0	0	0	3	0	0	0	0	0	0	0											2.4202E4								1	1	0	0	0	0	0	0	0
190	649	Q8VYF5|NILP1_ARATH	128.9	8	0	4	0	0	0	0	0	4	0	0	0	0	0	0	0	0	0	0		6.6607E4						4.3388E4											2	2	0	1	0	0	0	0	0
183	691	Q42586|UMPS_ARATH	66.69	2	0	0	0	2	0	0	0	0	0	2	0	0	0	0	0	0	0	0				1.0552E5						1.4314E4									1	1	0	0	0	3	0	0	0
[truncated: 17 more columns]

## Sheet: Table S6-3
Table S6-3 Localization of proteins from Triticum aestivum, treatmented by NO2
Apoplast
Protein Group	Protein ID	Accession	-10lgP	Coverage (%)	Coverage (%)																		Area																				#Spec
					Control-1	Control-2	Control-3	Control-4	Control-5	Control-6	Control-7	Control-8	Control-9	Control-10	Control-11	Control-12	Control-13	Control-14	Control-15	Control-16	Control-17	Control-18	Control-1	Control-2	Control-3	Control-4	Control-5	Control-6	Control-7	Control-8	Control-9	Control-10	Control-11	Control-12	Control-13	Control-14	Control-15	Control-16	Control-17	Control-18	#Peptides	#Unique	Control-1	Control-2	Control-3	Control-4	Control-5	Control-6	Control-7
121	217	P26759|GER3_WHEAT	158.22	23	8	0	8	0	0	0	0	4	0	0	0	0	0	0	0	0	8	0	2.0654E5		1.2057E5					6.9991E4									2.8928E5		4	4	3	0	2	0	0	0	0
Cell wall
Protein Group	Protein ID	Accession	-10lgP	Coverage (%)	Coverage (%)																		Area																				#Spec
					Control-1	Control-2	Control-3	Control-4	Control-5	Control-6	Control-7	Control-8	Control-9	Control-10	Control-11	Control-12	Control-13	Control-14	Control-15	Control-16	Control-17	Control-18	Control-1	Control-2	Control-3	Control-4	Control-5	Control-6	Control-7	Control-8	Control-9	Control-10	Control-11	Control-12	Control-13	Control-14	Control-15	Control-16	Control-17	Control-18	#Peptides	#Unique	Control-1	Control-2	Control-3	Control-4	Control-5	Control-6	Control-7
121	217	P26759|GER3_WHEAT	158.22	23	8	0	8	0	0	0	0	4	0	0	0	0	0	0	0	0	8	0	2.0654E5		1.2057E5					6.9991E4									2.8928E5		4	4	3	0	2	0	0	0	0
219	586	O04487|EF1G1_ARATH	75.59	2	0	2	0	0	0	0	0	0	0	0	0	0	0	0	0	0	0	2		1.7589E5																2.4377E3	1	1	0	3	0	0	0	0	0
Chloroplast
Protein Group	Protein ID	Accession	-10lgP	Coverage (%)	Coverage (%)																		Area																				#Spec
					Control-1	Control-2	Control-3	Control-4	Control-5	Control-6	Control-7	Control-8	Control-9	Control-10	Control-11	Control-12	Control-13	Control-14	Control-15	Control-16	Control-17	Control-18	Control-1	Control-2	Control-3	Control-4	Control-5	Control-6	Control-7	Control-8	Control-9	Control-10	Control-11	Control-12	Control-13	Control-14	Control-15	Control-16	Control-17	Control-18	#Peptides	#Unique	Control-1	Control-2	Control-3	Control-4	Control-5	Control-6	Control-7
241	808	Q9LFG2|DAPF_ARATH	61.23	3	0	0	0	3	0	0	0	0	0	0	0	0	0	0	0	0	0	0				2.3777E4															1	1	0	0	0	1	0	0	0
293	1214	Q05758|ILV5_ARATH	60.23	3	0	0	0	0	0	3	0	0	0	0	0	0	0	0	0	0	0	0						5.2582E3													1	1	0	0	0	0	0	1	0
145	101	Q10MQ2|DAPAT_ORYSJ	174.37	17	0	13	0	0	0	0	0	0	3	0	0	0	0	0	0	0	0	2		1.1705E5							1.4877E4									1.4009E4	6	6	0	5	0	0	0	0	0
222	338	Q8RWV0|TKTC1_ARATH	87.42	3	0	0	0	0	1	0	0	0	0	1	0	0	0	0	0	0	0	0					3.9661E4					2.8444E4									2	2	0	0	0	0	1	0	0
173	221	A8MS68|PLPD1_ARATH	131.01	6	0	0	0	0	0	1	0	0	0	0	0	0	0	0	0	0	0	0						8.4575E3													3	3	0	0	0	0	0	1	0
173	241	F4JLP5|PLPD2_ARATH	131.01	7	0	0	0	0	0	1	0	0	0	0	0	0	0	0	0	0	0	0						8.4575E3													3	3	0	0	0	0	0	1	0
255	1113	Q9SNY3|GMD1_ARATH	71.3	2	0	2	0	0	0	0	0	0	2	0	0	0	0	0	0	0	0	2		3.791E4							1.2909E4									6.2234E4	1	1	0	1	0	0	0	0	0
120	154	P93819|MDHC1_ARATH	177.33	14	0	0	3	10	0	0	0	0	0	0	0	0	0	0	0	0	0	0			3.5001E4	2.6922E5															4	4	0	0	1	7	0	0	0
200	252	Q9SN86|MDHP_ARATH	153.77	7	0	0	0	7	0	0	0	0	0	0	0	0	0	3	0	0	0	0				1.7225E5															3	1	0	0	0	3	0	0	0
222	599	F4IW47|TKTC2_ARATH	87.42	3	0	0	0	0	1	0	0	0	0	1	0	0	0	0	0	0	0	0					3.9661E4					2.8444E4									2	2	0	0	0	0	1	0	0
169	563	Q8W593|LGUC_ARATH	97.57	4	0	0	0	4	0	0	0	0	0	0	0	0	0	0	0	0	0	0				9.3715E4															1	1	0	0	0	2	0	0	0
229	334	Q9S9P8|FNRR2_ARATH	87.5	6	0	0	0	2	0	0	0	0	0	0	0	0	0	0	0	0	0	0				5.7751E4															2	2	0	0	0	2	0	0	0
353	1394	P52410|KASC1_ARATH	50.23	2	0	2	0	0	0	0	0	0	0	0	0	0	0	0	0	0	0	0		1.9445E4																	1	1	0	1	0	0	0	0	0
172	533	Q9SLA8|FABI_ARATH	82.99	3	0	0	0	3	0	0	0	0	0	0	0	0	0	0	0	0	0	0				1.7924E5															1	1	0	0	0	4	0	0	0
193	143	Q9LTX9|HSP7G_ARATH	123.8	6	0	0	0	0	2	0	0	0	0	4	0	0	0	0	0	0	0	0					1.772E4					3.5221E4									3	3	0	0	0	0	1	0	0
298	496	Q9SIF2|HS905_ARATH	51.66	2	0	0	0	0	0	0	0	0	0	2	0	0	0	0	0	0	0	0										9.0368E3									1	1	0	0	0	0	0	0	0
117	67	O24396|PURA_WHEAT	223.39	24	0	3	0	0	0	0	12	0	3	0	0	0	0	0	0	0	0	5		0					3.5488E4		1.4117E4									5.6299E4	9	8	0	1	0	0	0	0	4
292	2550	Q9LF04|STAD1_ARATH	59.32	3	0	0	0	3	0	0	0	0	0	0	0	0	0	0	0	0	0	0				3.8659E4															1	1	0	0	0	1	0	0	0
292	2737	Q9LF05|STAD3_ARATH	59.32	3	0	0	0	3	0	0	0	0	0	0	0	0	0	0	0	0	0	0				3.8659E4															1	1	0	0	0	1	0	0	0
292	3140	Q9M879|STAD5_ARATH	59.32	3	0	0	0	3	0	0	0	0	0	0	0	0	0	0	0	0	0	0				3.8659E4															1	1	0	0	0	1	0	0	0
292	1180	O22832|STAD7_ARATH	59.32	3	0	0	0	3	0	0	0	0	0	0	0	0	0	0	0	0	0	0				3.8659E4															1	1	0	0	0	1	0	0	0
131	127	P80602|BAS1_WHEAT	206.62	29	6	0	29	0	0	0	0	0	0	0	0	0	0	0	0	0	0	0	2.3428E4		3.0184E5																5	5	1	0	7	0	0	0	0
165	90	Q1XIR9|HGL1A_WHEAT	156.88	13	0	2	2	2	0	0	0	0	3	0	0	0	0	0	0	0	2	0		1.4878E4	8.4631E3						1.8533E4								0		7	5	0	1	1	1	0	0	0
181	114	D5MTF8|HGL1D_WHEAT	120.07	7	0	2	0	4	0	0	0	0	0	0	0	0	0	0	0	0	0	0		3.7536E4		6.9845E4															3	1	0	1	0	2	0	0	0
142	356	P47999|CYSKP_ARATH	159.43	10	0	0	0	7	0	0	0	0	0	0	0	0	0	0	0	0	0	0				3.2248E4															3	2	0	0	0	8	0	0	0
60	125	Q9SH69|6PGD1_ARATH	188.25	11	0	0	0	0	0	2	11	0	7	0	0	0	2	0	0	0	0	7							0		2.2201E4									5.1538E4	4	1	0	0	0	0	0	1	7
132	476	Q00917|SUS2_ARATH	118.79	2	0	0	0	0	1	0	0	0	0	2	0	0	0	0	0	0	0	0					1.0482E4					2.1536E4									2	1	0	0	0	0	2	0	0
153	306	Q43199|APT1_WHEAT	164.59	29	13	0	29	0	0	0	0	0	0	0	0	0	0	0	0	0	0	0	7.3815E4		1.4657E5																4	4	4	0	6	0	0	0	0
76	39	P38076|CYSK_WHEAT	281.82	50	0	0	0	46	0	0	0	0	0	0	0	0	0	11	0	6	0	0				4.4265E5										1.5183E4		1.2485E3			12	11	0	0	0	23	0	0	0
220	385	O24473|IF2B_WHEAT	89.53	7	0	0	0	4	0	0	0	0	0	0	0	0	0	0	0	0	0	0				2.9065E4															2	2	0	0	0	1	0	0	0
Cytoplasm
Protein Group	Protein ID	Accession	-10lgP	Coverage (%)	Coverage (%)																		Area																				#Spec
					Control-1	Control-2	Control-3	Control-4	Control-5	Control-6	Control-7	Control-8	Control-9	Control-10	Control-11	Control-12	Control-13	Control-14	Control-15	Control-16	Control-17	Control-18	Control-1	Control-2	Control-3	Control-4	Control-5	Control-6	Control-7	Control-8	Control-9	Control-10	Control-11	Control-12	Control-13	Control-14	Control-15	Control-16	Control-17	Control-18	#Peptides	#Unique	Control-1	Control-2	Control-3	Control-4	Control-5	Control-6	Control-7
17	81	O50008|METE1_ARATH	285.94	15	1	1	1	1	12	0	0	0	1	14	0	0	0	2	2	0	0	1	7.4638E4	1.3237E5	7.7342E4	7.999E4	6.2864E5				1.6835E4	3.0529E6				8.9712E3	4.901E3			9.6335E4	10	10	1	4	2	2	20	0	0
124	228	P35510|PAL1_ARATH	155.36	6	0	0	0	0	6	0	0	0	0	6	0	0	0	0	0	0	0	0					2.0339E4					2.2782E3									3	1	0	0	0	0	6	0	0
106	142	Q9SS45|PAL4_ARATH	196.3	7	0	0	0	0	7	0	0	0	0	5	0	0	0	0	0	0	0	0					1.4116E5					1.417E5									6	4	0	0	0	0	8	0	0
124	168	Q43210|PALY_WHEAT	155.36	6	0	0	0	0	6	0	0	0	0	6	0	0	0	0	0	0	0	0					2.0339E4					2.2782E3									3	1	0	0	0	0	6	0	0
206	436	Q9M1R2|SYPC_ARATH	102.95	4	0	0	0	0	0	4	0	0	0	0	0	0	0	0	0	0	0	0						4.1002E4													1	1	0	0	0	0	0	1	0
80	91	P23686|METK1_ARATH	227.63	23	0	15	0	3	0	0	0	0	9	0	3	0	0	0	0	0	0	18		4.083E4							1.5578E4									5.6319E4	7	2	0	14	0	2	0	0	0
98	257	Q9SJL8|METK3_ARATH	184.62	9	0	9	0	0	0	0	0	0	4	0	0	0	0	0	0	0	0	9		8.4513E3																9.1843E2	3	1	0	11	0	0	0	0	0
83	129	Q9LUT2|METK4_ARATH	221.93	18	0	15	0	3	0	0	0	0	6	0	3	0	0	0	0	0	0	15		2.1838E4																	6	1	0	14	0	2	0	0	0
61	132	O23254|GLYC4_ARATH	203.78	15	0	0	0	0	0	7	7	0	0	0	0	0	0	0	0	0	0	0						7.8809E4	1.8076E5												6	5	0	0	0	0	0	4	4
179	505	Q9LM59|GLYC6_ARATH	84.34	2	0	0	0	0	0	2	0	0	0	0	0	0	0	0	0	0	0	0						5.8307E3													1	1	0	0	0	0	0	1	0
179	943	Q84WV0|GLYC7_ARATH	84.34	2	0	0	0	0	0	2	0	0	0	0	0	0	0	0	0	0	0	0						5.8307E3													1	1	0	0	0	0	0	1	0
135	46	Q9LKJ3|PHSH_WHEAT	246.04	17	0	0	0	0	0	0	0	0	0	8	0	0	0	0	0	0	0	0										2.1386E5									11	11	0	0	0	0	0	0	0
157	131	Q9SRZ6|ICDHC_ARATH	163.72	14	3	5	0	5	0	0	0	0	0	0	0	0	0	0	0	0	0	0				5.3826E3															5	2	1	4	0	2	0	0	0
115	201	Q9LF98|ALFC8_ARATH	201.06	11	0	0	0	11	0	0	0	0	0	0	0	0	0	0	0	0	0	0				9.3782E5															5	5	0	0	0	12	0	0	0
226	230	Q93VR3|GME_ARATH	109.34	8	0	5	0	0	0	0	0	0	0	0	0	0	0	0	0	0	0	2		9.0733E4																2.1484E3	3	3	0	3	0	0	0	0	0
255	1420	P93031|GMD2_ARATH	71.3	2	0	2	0	0	0	0	0	0	2	0	0	0	0	0	0	0	0	2		3.791E4							1.2909E4									6.2234E4	1	1	0	1	0	0	0	0	0
59	29	Q9MAH0|CAPP1_ARATH	265.54	17	0	0	0	0	0	0	0	0	0	0	0	0	0	0	6	0	0	0															2.731E4				13	3	0	0	0	0	0	0	0
96	115	Q1W374|PMM_WHEAT	224.73	23	0	0	0	0	0	0	0	0	0	0	0	0	0	0	0	0	23	0																	4.1455E5		5	5	0	0	0	0	0	0	0
108	534	Q9M1B9|SCRK4_ARATH	128.24	7	0	0	0	7	0	0	0	0	0	0	0	0	0	7	0	7	0	0				2.4245E5										6.5165E2		1.8951E3			2	1	0	0	0	7	0	0	0
101	310	O82616|SCRK5_ARATH	152.74	10	0	0	0	10	0	0	0	0	0	0	0	0	0	3	0	3	0	0				5.7297E5										1.0408E3		3.7856E3			3	3	0	0	0	10	0	0	0
268	1054	Q9SUN3|ARAE3_ARATH	58.83	3	0	0	0	0	0	0	0	0	3	0	0	0	0	0	0	0	0	3									8.205E3									2.7054E4	1	1	0	0	0	0	0	0	0
65	95	P57751|UGPA1_ARATH	212.52	13	0	0	0	0	0	13	4	0	0	0	0	0	0	0	0	0	0	0						3.7638E5	2.5483E4												5	5	0	0	0	0	0	13	1
65	103	Q9M9P3|UGPA2_ARATH	212.52	13	0	0	0	0	0	13	4	0	0	0	0	0	0	0	0	0	0	0						3.7638E5	2.5483E4												5	5	0	0	0	0	0	13	1
276	507	Q9FIW4|BGL42_ARATH	58.06	2	0	0	0	0	0	2	0	0	0	0	0	0	0	0	0	0	0	0						4.8758E3													1	1	0	0	0	0	0	1	0
46	149	Q8LRM8|TCTP_WHEAT	258.67	44	28	0	40	0	0	0	0	0	0	0	0	0	0	0	0	0	0	0	4.7691E5		1.3055E6																8	8	10	0	22	0	0	0	0
41	24	Q9ZRB7|TBA_WHEAT	288.73	48	0	8	0	6	9	14	8	4	7	8	0	0	0	0	4	0	4	7		1.0728E5				1.2633E5			4.3603E4									1.5401E5	16	4	0	5	0	2	2	5	2
30	16	Q9ZRB2|TBB1_WHEAT	282.92	41	0	15	0	4	2	25	11	0	15	9	0	0	2	0	0	0	0	13		2.7776E4							0									6.029E4	17	1	0	7	0	2	1	10	6
36	15	Q9ZRB1|TBB2_WHEAT	286.61	45	0	12	0	6	2	23	9	0	13	9	0	0	2	0	0	0	0	11		2.8558E4		0					1.5122E4									5.4765E4	18	1	0	7	0	3	1	9	5
18	12	Q9ZRB0|TBB3_WHEAT	307.49	54	0	14	0	9	2	40	8	0	14	6	0	0	2	0	0	0	0	9						2.9014E4													20	2	0	9	0	5	1	16	5
30	13	Q9ZRA8|TBB5_WHEAT	282.92	40	0	15	0	4	2	25	11	0	15	9	0	0	2	0	0	0	0	13		2.7776E4							0									6.029E4	17	1	0	7	0	2	1	10	6
175	124	Q9ZUY6|AXS1_ARATH	177.29	17	0	5	0	0	0	0	0	0	3	0	0	0	3	0	0	0	0	5		9.5016E4							1.68E4				1.202E3					1.1102E5	6	6	0	2	0	0	0	0	0
175	118	Q9SGE0|AXS2_ARATH	177.29	17	0	5	0	0	0	0	0	0	3	0	0	0	3	0	0	0	0	5		9.5016E4							1.68E4				1.202E3					1.1102E5	6	6	0	2	0	0	0	0	0
158	514	Q9SGY2|ACLA1_ARATH	111.48	4	0	4	0	0	0	0	0	0	2	0	0	0	0	0	0	0	0	4		1.38E5							3.2551E4									1.981E5	2	2	0	4	0	0	0	0	0
158	508	O22718|ACLA2_ARATH	111.48	4	0	4	0	0	0	0	0	0	2	0	0	0	0	0	0	0	0	4		1.38E5							3.2551E4									1.981E5	2	2	0	4	0	0	0	0	0
158	499	O80526|ACLA3_ARATH	111.48	4	0	4	0	0	0	0	0	0	2	0	0	0	0	0	0	0	0	4		1.38E5							3.2551E4									1.981E5	2	2	0	4	0	0	0	0	0
272	286	Q9C522|ACLB1_ARATH	79.94	3	0	0	0	0	0	0	0	3	0	0	0	0	0	0	0	0	0	0								1.702E4											1	1	0	0	0	0	0	0	0
242	848	Q9SA73|OLA1_ARATH	107.27	6	0	4	0	0	0	0	0	0	0	0	0	0	0	0	0	0	0	0		3.2582E4																	2	2	0	2	0	0	0	0	0
269	1591	F4K1Z0|ECT3_ARATH	53.07	2	2	0	0	0	0	0	0	0	0	0	0	0	0	0	0	0	0	0	1.2409E4																		1	1	1	0	0	0	0	0	0
15	92	Q9FJA6|RS33_ARATH	273.44	30	8	0	5	0	0	0	0	5	0	0	5	5	0	0	0	0	27	0	0		3.8459E4					8.6384E4			2.2518E4	1.6247E5					4.7808E6		9	9	3	0	1	0	0	0	0
37	171	Q93VH9|RS41_ARATH	240.15	22	4	0	0	0	0	0	0	4	0	0	13	0	0	0	0	0	0	0	1.5972E4							1.5042E4			3.4107E5								5	5	1	0	0	0	0	0	0
37	169	P49204|RS42_ARATH	240.15	22	4	0	0	0	0	0	0	4	0	0	13	0	0	0	0	0	0	0	1.5972E4							1.5042E4			3.4107E5								5	5	1	0	0	0	0	0	0
37	140	Q8VYK6|RS43_ARATH	240.15	22	4	0	0	0	0	0	0	4	0	0	13	0	0	0	0	0	0	0	1.5972E4							1.5042E4			3.4107E5								5	5	1	0	0	0	0	0	0
28	291	O48549|RS61_ARATH	221.72	13	0	0	6	0	0	0	0	4	0	0	4	0	0	0	0	0	13	0			6.0246E3					1.9013E5			2.1581E5						1.2985E6		4	4	0	0	1	0	0	0	0
104	139	Q9FLF0|RS92_ARATH	160.89	27	4	0	10	0	0	0	0	0	0	0	0	0	0	0	0	0	0	0	1.0755E5		3.2519E5																5	5	3	0	6	0	0	0	0
39	205	Q08682|RSSA1_ARATH	215.99	20	13	4	13	10	0	0	0	3	0	0	0	0	3	0	0	0	13	0	3.95E5	2.3313E4	4.0022E5	8.7538E4				6.9017E4					0				5.5626E5		4	4	10	1	9	5	0	0	0
214	1050	Q42112|RLA02_ARATH	90.97	5	0	0	0	5	0	0	0	0	0	0	0	0	0	0	0	0	0	0				5.6454E5															2	2	0	0	0	2	0	0	0
35	146	Q93VT9|RL101_ARATH	203.51	21	18	5	21	5	0	0	0	0	0	0	0	0	0	0	0	0	14	5	1.392E6	1.3973E4	1.7134E6	0													9.9277E4	1.9597E4	5	5	17	1	19	1	0	0	0
35	176	Q08770|RL102_ARATH	203.51	21	18	5	21	5	0	0	0	0	0	0	0	0	0	0	0	0	14	5	1.392E6	1.3973E4	1.7134E6	0													9.9277E4	1.9597E4	5	5	17	1	19	1	0	0	0
35	190	Q93W22|RL103_ARATH	203.51	21	18	5	21	5	0	0	0	0	0	0	0	0	0	0	0	0	14	5	1.392E6	1.3973E4	1.7134E6	0													9.9277E4	1.9597E4	5	5	17	1	19	1	0	0	0
72	177	P59230|R10A2_ARATH	216	19	4	0	4	0	0	0	0	6	0	0	0	0	0	0	0	0	12	0								1.1038E4									4.5735E5		5	2	1	0	1	0	0	0	0
207	729	P50883|RL121_ARATH	96.97	9	0	0	9	0	0	0	0	0	0	0	0	0	0	0	0	0	0	0			3.1006E4																1	1	0	0	1	0	0	0	0
207	730	Q9LFH5|RL122_ARATH	96.97	9	0	0	9	0	0	0	0	0	0	0	0	0	0	0	0	0	0	0			3.1006E4																1	1	0	0	1	0	0	0	0
207	727	Q9FF52|RL123_ARATH	96.97	9	0	0	9	0	0	0	0	0	0	0	0	0	0	0	0	0	0	0			3.1006E4																1	1	0	0	1	0	0	0	0
73	182	Q9FF90|RL133_ARATH	238.37	19	0	0	0	0	0	0	0	0	0	0	14	0	0	0	0	0	0	0											2.3241E4								8	3	0	0	0	0	0	0	0
139	1877	Q9LRX8|R13A2_ARATH	67.51	4	4	0	4	0	0	0	0	0	0	0	0	0	0	0	0	0	0	0	6.6533E4		3.2576E5																1	1	1	0	2	0	0	0	0
139	5446	Q9SVR0|R13A3_ARATH	67.51	4	4	0	4	0	0	0	0	0	0	0	0	0	0	0	0	0	0	0	6.6533E4		3.2576E5																1	1	1	0	2	0	0	0	0
139	4291	Q9FKC0|R13A4_ARATH	67.51	4	4	0	4	0	0	0	0	0	0	0	0	0	0	0	0	0	0	0	6.6533E4		3.2576E5																1	1	1	0	2	0	0	0	0
204	4073	Q93VI3|RL171_ARATH	93.72	5	0	0	5	0	0	0	0	0	0	0	0	0	0	0	0	0	0	0			9.9729E4																1	1	0	0	3	0	0	0	0
204	2141	P51413|RL172_ARATH	93.72	5	0	0	5	0	0	0	0	0	0	0	0	0	0	0	0	0	0	0			9.9729E4																1	1	0	0	3	0	0	0	0
47	292	Q9SRX2|RL191_ARATH	188.09	9	9	0	9	0	0	0	0	0	0	0	0	0	0	0	0	0	9	0	1.7438E6		1.2598E6														1.3939E6		5	5	13	0	12	0	0	0	0
47	231	P49693|RL193_ARATH	188.09	10	10	0	10	0	0	0	0	0	0	0	0	0	0	0	0	0	10	0	1.7438E6		1.2598E6														1.3939E6		5	5	13	0	12	0	0	0	0
32	84	P17094|RL31_ARATH	276.22	17	0	15	0	0	0	0	2	0	10	0	0	0	3	0	0	0	0	15									5.0372E4										9	1	0	29	0	0	0	0	2
31	100	P22738|RL32_ARATH	278.73	17	0	15	0	0	0	0	8	0	8	0	0	0	3	0	0	0	0	17							0											1.7979E5	10	2	0	29	0	0	0	0	3
302	561	Q9SF40|RL4A_ARATH	51.51	3	0	3	0	0	0	0	0	0	0	0	0	0	0	0	0	0	0	0		4.2646E3																	1	1	0	1	0	0	0	0	0
302	455	P49691|RL4B_ARATH	51.51	3	0	3	0	0	0	0	0	0	0	0	0	0	0	0	0	0	0	0		4.2646E3																	1	1	0	1	0	0	0	0	0
118	311	Q8LBI1|RL51_ARATH	180.08	11	0	0	0	11	0	0	0	0	0	0	0	0	0	0	0	5	0	0				1.3291E6												3.7724E3			4	4	0	0	0	12	0	0	0
118	305	P49227|RL52_ARATH	180.08	11	0	0	0	11	0	0	0	0	0	0	0	0	0	0	0	5	0	0				1.3291E6												3.7724E3			4	4	0	0	0	12	0	0	0
82	394	P60040|RL72_ARATH	183.94	13	5	0	5	0	0	0	0	4	0	0	0	0	0	0	0	0	13	0																	1.3634E5		4	1	2	0	1	0	0	0	0
64	276	Q9LHP1|RL74_ARATH	184.67	12	8	0	5	0	0	0	0	4	0	0	0	0	0	0	0	0	12	0	6.6448E4																1.5333E6		4	1	3	0	1	0	0	0	0
48	269	P49692|RL7A1_ARATH	183.77	12	0	0	0	0	0	0	0	0	0	0	5	0	0	0	0	0	0	0											1.0152E5								5	5	0	0	0	0	0	0	0
48	222	Q9LZH9|RL7A2_ARATH	183.77	12	0	0	0	0	0	0	0	0	0	0	5	0	0	0	0	0	0	0											1.0152E5								5	5	0	0	0	0	0	0	0
68	186	P46286|RL81_ARATH	196.77	16	0	0	4	0	0	0	0	0	0	0	0	0	0	0	0	0	4	0			2.7338E4														4.6906E4		5	5	0	0	2	0	0	0	0
3	63	P0DH99|EF1A1_ARATH	325.5	29	10	16	2	8	0	2	17	2	9	0	2	0	2	0	4	0	10	11	0	3.8576E4															1.0266E4		13	2	4	18	1	7	0	1	16
3	61	Q8W4H7|EF1A2_ARATH	325.5	29	10	16	2	8	0	2	17	2	9	0	2	0	2	0	4	0	10	11	0	3.8576E4															1.0266E4		13	2	4	18	1	7	0	1	16
3	62	Q0WL56|EF1A3_ARATH	325.5	29	10	16	2	8	0	2	17	2	9	0	2	0	2	0	4	0	10	11	0	3.8576E4															1.0266E4		13	2	4	18	1	7	0	1	16
3	64	Q8GTY0|EF1A4_ARATH	325.5	29	10	16	2	8	0	2	17	2	9	0	2	0	2	0	4	0	10	11	0	3.8576E4															1.0266E4		13	2	4	18	1	7	0	1	16
1	9	Q03033|EF1A_WHEAT	380.8	44	7	18	2	8	0	10	31	2	14	0	2	0	2	0	4	0	10	17		3.1612E5				6.6733E4	1.7094E6		1.1625E3								4.1501E4	4.3483E3	17	6	3	20	1	7	0	7	25
44	138	P29546|EF1B_WHEAT	261.34	36	0	0	0	0	0	0	0	0	0	0	10	0	0	0	0	0	0	0											5.3745E4								8	8	0	0	0	0	0	0	0
51	58	Q9ASR1|EF2_ARATH	239.59	13	0	0	0	1	3	1	0	0	1	0	0	0	0	0	1	0	3	0				1.3331E4	4.8549E3	1.086E4			9.1911E3						4.8604E3		5.0591E3		10	10	0	0	0	1	1	1	0
4	4	P41378|IF4A_WHEAT	410.02	52	3	28	3	0	0	0	26	0	27	0	0	0	2	0	0	0	0	29	2.0034E4	6.6472E5	1.6585E4				4.8525E5		5.516E5				3.3711E4					1.9084E6	23	21	1	24	1	0	0	0	16
192	1532	Q9SZA3|EIF3K_ARATH	73.47	4	0	0	0	0	0	0	0	4	0	0	0	0	0	0	0	0	4	0								9.027E3									2.2259E5		1	1	0	0	0	0	0	0	0
187	452	Q9LTR9|NMT1_ARATH	101.51	5	0	5	0	0	0	0	0	0	3	0	0	0	0	0	0	0	0	3		4.1772E4							1.8276E4									5.7231E4	2	2	0	4	0	0	0	0	0
267	299	Q9LXC0|GDI_ARATH	99.67	7	0	0	0	0	0	0	7	0	0	0	0	0	0	0	0	0	0	0							5.0418E4												2	2	0	0	0	0	0	0	2
53	98	Q9S9N1|HSP7E_ARATH	233.7	14	5	2	7	2	11	0	2	0	2	5	0	0	0	0	0	0	7	0					1.8554E4														8	2	2	1	4	1	15	0	1
128	78	P27323|HS901_ARATH	212.02	15	0	0	0	1	5	0	0	0	0	7	0	0	0	0	0	0	3	0										6.3695E4							2.9673E3		9	3	0	0	0	1	5	0	0
57	38	O03986|HS904_ARATH	271.23	26	0	0	0	1	12	0	0	0	0	17	0	0	0	0	2	0	0	2										6.7751E3									17	1	0	0	0	1	13	0	0
334	2829	P93732|PIP_ARATH	51.4	2	0	0	0	2	0	0	0	0	0	0	0	0	0	0	0	0	0	0				2.0864E4															1	1	0	0	0	1	0	0	0
285	384	P28769|TCPA_ARATH	52.1	2	0	0	0	0	0	0	0	2	0	0	0	0	0	0	0	0	0	0								2.0853E3											1	1	0	0	0	0	0	0	0
111	76	Q940P8|TCPB_ARATH	219.73	19	0	0	0	0	0	0	0	0	0	0	0	0	0	0	0	0	11	0																	1.6937E5		7	7	0	0	0	0	0	0	0
114	106	O04450|TCPE_ARATH	185.26	11	0	0	0	0	0	0	0	0	0	0	4	0	0	0	0	0	0	0											2.5325E4								6	6	0	0	0	0	0	0	0
278	194	W5DYE3|DMS1A_WHEAT	63.29	3	0	0	0	3	0	0	0	0	0	0	0	0	0	0	0	0	0	0				4.6715E4															1	1	0	0	0	1	0	0	0
278	216	A0A1D5XGW0|DMS1B_WHEAT	63.29	3	0	0	0	3	0	0	0	0	0	0	0	0	0	0	0	0	0	0				4.6715E4															1	1	0	0	0	1	0	0	0
278	234	A0A1X9QHJ0|DMS1D_WHEAT	63.29	3	0	0	0	3	0	0	0	0	0	0	0	0	0	0	0	0	0	0				4.6715E4															1	1	0	0	0	1	0	0	0
90	612	Q05431|APX1_ARATH	89.3	4	4	0	4	0	0	0	0	0	0	0	0	0	0	0	0	0	4	0	2.3326E5		1.4577E5														1.6826E6		1	1	4	0	2	0	0	0	0
91	422	Q1PER6|APX2_ARATH	88.19	4	4	0	0	0	0	0	0	4	0	0	4	0	0	0	0	0	4	0	7.277E4							1.4846E5			3.2106E4						5.3465E5		1	1	1	0	0	0	0	0	0
121	217	P26759|GER3_WHEAT	158.22	23	8	0	8	0	0	0	0	4	0	0	0	0	0	0	0	0	8	0	2.0654E5		1.2057E5					6.9991E4									2.8928E5		4	4	3	0	2	0	0	0	0
142	356	P47999|CYSKP_ARATH	159.43	10	0	0	0	7	0	0	0	0	0	0	0	0	0	0	0	0	0	0				3.2248E4															3	2	0	0	0	8	0	0	0
60	125	Q9SH69|6PGD1_ARATH	188.25	11	0	0	0	0	0	2	11	0	7	0	0	0	2	0	0	0	0	7							0		2.2201E4									5.1538E4	4	1	0	0	0	0	0	1	7
132	476	Q00917|SUS2_ARATH	118.79	2	0	0	0	0	1	0	0	0	0	2	0	0	0	0	0	0	0	0					1.0482E4					2.1536E4									2	1	0	0	0	0	2	0	0
153	306	Q43199|APT1_WHEAT	164.59	29	13	0	29	0	0	0	0	0	0	0	0	0	0	0	0	0	0	0	7.3815E4		1.4657E5																4	4	4	0	6	0	0	0	0
76	39	P38076|CYSK_WHEAT	281.82	50	0	0	0	46	0	0	0	0	0	0	0	0	0	11	0	6	0	0				4.4265E5										1.5183E4		1.2485E3			12	11	0	0	0	23	0	0	0
26	26	P53496|ACT11_ARATH	296.5	37	14	17	3	19	0	0	0	5	5	0	5	0	5	0	5	5	18	7	2.6243E4			5.7401E4													0	1.8684E4	12	1	7	7	1	12	0	0	0
12	32	P53497|ACT12_ARATH	303.54	37	14	20	6	19	0	0	0	5	7	0	5	0	5	0	5	5	18	7	8.3285E4	4.8644E4	8.0772E4	1.9892E5					3.1976E3								2.1114E5	7.1767E4	12	1	8	10	4	12	0	0	0
12	31	P53494|ACT4_ARATH	303.54	37	14	20	6	19	0	0	0	5	7	0	5	0	5	0	5	5	18	7	8.3285E4	4.8644E4	8.0772E4	1.9892E5					3.1976E3								2.1114E5	7.1767E4	12	1	8	10	4	12	0	0	0
108	312	Q9LNE4|SCRK3_ARATH	128.24	6	0	0	0	6	0	0	0	0	0	0	0	0	0	6	0	6	0	0				2.4245E5										6.5165E2		1.8951E3			2	1	0	0	0	7	0	0	0
108	364	Q9LNE3|SCRK2_ARATH	128.24	7	0	0	0	7	0	0	0	0	0	0	0	0	0	7	0	7	0	0				2.4245E5										6.5165E2		1.8951E3			2	1	0	0	0	7	0	0	0
122	249	O80501|RAH1B_ARATH	114.34	11	11	0	11	0	0	0	0	0	0	0	0	0	0	0	0	0	0	0	2.0989E4		3.0792E4																2	1	4	0	7	0	0	0	0
122	289	Q9SMR4|RAH1C_ARATH	114.34	10	10	0	10	0	0	0	0	0	0	0	0	0	0	0	0	0	0	0	2.0989E4		3.0792E4																2	1	4	0	7	0	0	0	0
100	68	Q9SIB9|ACO3M_ARATH	228.68	10	0	0	0	0	0	0	0	0	0	0	0	0	0	0	2	0	0	0															4.4235E4				7	2	0	0	0	0	0	0	0
62	294	P48491|TPIS_ARATH	129.02	7	7	0	7	0	0	0	0	4	0	0	0	0	0	0	0	0	7	0	1.134E6		9.3934E5					9.5041E4									5.5604E5		2	2	10	0	8	0	0	0	0
266	529	Q39243|TRXB1_ARATH	68.98	4	0	0	0	4	0	0	0	0	0	0	0	0	0	0	0	0	0	0				1.0725E4															1	1	0	0	0	1	0	0	0
266	613	Q39242|TRXB2_ARATH	68.98	4	0	0	0	4	0	0	0	0	0	0	0	0	0	0	0	0	0	0				1.0725E4															1	1	0	0	0	1	0	0	0
185	180	Q9ZPS3|DCE4_ARATH	130.17	12	0	0	0	0	0	5	2	0	0	0	0	0	0	0	0	0	0	0						6.308E3	3.7021E4												4	4	0	0	0	0	0	2	1
130	571	O48661|SPDS2_ARATH	121.02	8	0	0	0	4	0	0	0	0	0	0	0	0	0	0	0	4	0	0				1.2988E5												1.8837E3			2	2	0	0	0	5	0	0	0
43	211	P42644|14333_ARATH	211.9	20	0	0	0	0	0	0	0	3	0	4	7	0	0	0	0	0	6	0																	4.0782E4		7	1	0	0	0	0	0	0	0
54	162	P25858|G3PC1_ARATH	195.26	20	4	4	9	17	0	0	0	4	0	0	0	0	0	0	4	0	9	9	9.7725E4	4.6092E4	8.3394E4	3.7565E5				2.203E4							3.2231E3		1.2975E5	6.4284E4	5	5	3	1	3	8	0	0	0
54	141	Q9FX54|G3PC2_ARATH	195.26	20	4	4	9	17	0	0	0	4	0	0	0	0	0	0	4	0	9	9	9.7725E4	4.6092E4	8.3394E4	3.7565E5				2.203E4							3.2231E3		1.2975E5	6.4284E4	5	5	3	1	3	8	0	0	0
16	137	Q96300|14337_ARATH	245.19	26	5	0	0	5	0	0	0	3	0	4	7	0	0	0	0	0	15	0																	1.5665E5		10	3	1	0	0	1	0	0	0
7	108	Q9FZE1|UGDH1_ARATH	262.33	18	2	10	2	5	0	7	7	0	12	2	5	0	7	0	5	2	5	13		200000				5.3604E3	5.8002E3		8.6725E4									2.3892E5	8	3	1	16	1	2	0	8	6
8	69	Q9LIA8|UGDH2_ARATH	252.35	21	2	14	2	5	0	5	13	0	13	2	5	0	9	0	5	2	5	11		2.9752E4					6.1988E4		1.5844E4				2.9944E3					6.6359E3	9	4	1	15	1	2	0	7	7
166	353	Q94A52|RH2_ARATH	116.99	5	0	3	0	0	0	0	0	0	2	0	0	0	0	0	0	0	0	2		3.2638E4																	3	1	0	1	0	0	0	0	0
180	333	P29557|IF4E1_WHEAT	136.3	12	6	0	12	0	0	0	0	0	0	0	0	0	0	0	0	0	0	0	4.0659E4		5.2684E4																2	2	1	0	3	0	0	0	0
146	187	Q9FIB6|PS12A_ARATH	162.43	8	2	0	0	0	0	0	0	0	6	0	0	0	0	0	0	0	0	6	1.0862E5								4.5185E4									1.6968E5	4	4	1	0	0	0	0	0	0
110	238	Q9SEI2|PS6AA_ARATH	119.57	6	3	6	0	0	0	0	0	0	0	0	3	0	0	0	0	0	0	3		2.7212E4																	2	1	2	3	0	0	0	0	0
110	263	O04019|PS6AB_ARATH	119.57	6	3	6	0	0	0	0	0	0	0	0	3	0	0	0	0	0	0	3		2.7212E4																	2	1	2	3	0	0	0	0	0
89	83	Q9SEI4|PRS6B_ARATH	202.66	17	3	5	0	0	0	0	0	0	0	0	3	0	0	0	0	0	0	5		1.0367E4																1.3256E4	6	5	2	3	0	0	0	0	0
14	6	P22953|HS701_ARATH	312.12	29	5	6	9	2	23	0	2	2	5	16	2	0	0	0	0	0	11	2		2.4524E4			2.3601E4				2.078E3									1.1779E4	18	1	2	5	5	1	33	0	1
129	135	Q9S7C0|HSP7O_ARATH	180.05	6	0	0	0	0	0	0	0	0	0	0	0	0	0	0	1	0	0	0															7.9416E3				5	5	0	0	0	0	0	0	0
129	134	F4HQD4|HSP7P_ARATH	180.05	6	0	0	0	0	0	0	0	0	0	0	0	0	0	0	1	0	0	0															7.9416E3				5	5	0	0	0	0	0	0	0
20	5	P22954|HS702_ARATH	305.59	32	5	4	9	2	24	0	2	2	2	18	2	0	0	0	0	0	11	0										3.46E4									18	2	2	2	5	1	28	0	1
21	11	O65719|HSP7C_ARATH	278.51	29	5	4	9	2	23	0	2	2	2	19	2	0	0	0	0	0	11	0					4.937E4					9.1803E4									15	1	2	2	5	1	27	0	1
50	348	Q8H159|UBQ10_ARATH	193.91	10	3	5	7	2	2	0	0	2	0	0	0	0	0	0	2	0	5	2	1.2125E5	3.5468E4	2.4469E5	2.0837E4	8.8948E3			4.6908E3							5.1159E3		9.7286E4	3.2017E4	5	5	2	2	6	1	1	0	0
50	344	P0CH33|UBQ11_ARATH	193.91	21	6	10	14	4	4	0	0	4	0	0	0	0	0	0	4	0	10	4	1.2125E5	3.5468E4	2.4469E5	2.0837E4	8.8948E3			4.6908E3							5.1159E3		9.7286E4	3.2017E4	5	5	2	2	6	1	1	0	0
50	290	Q3E7K8|UBQ12_ARATH	193.91	20	6	10	13	4	4	0	0	4	0	0	0	0	0	0	4	0	10	4	1.2125E5	3.5468E4	2.4469E5	2.0837E4	8.8948E3			4.6908E3							5.1159E3		9.7286E4	3.2017E4	5	5	2	2	6	1	1	0	0
50	345	Q3E7T8|UBQ14_ARATH	193.91	15	4	7	10	3	3	0	0	3	0	0	0	0	0	0	3	0	7	3	1.2125E5	3.5468E4	2.4469E5	2.0837E4	8.8948E3			4.6908E3							5.1159E3		9.7286E4	3.2017E4	5	5	2	2	6	1	1	0	0
50	346	Q1EC66|UBQ3_ARATH	193.91	15	4	7	10	3	3	0	0	3	0	0	0	0	0	0	3	0	7	3	1.2125E5	3.5468E4	2.4469E5	2.0837E4	8.8948E3			4.6908E3							5.1159E3		9.7286E4	3.2017E4	5	5	2	2	6	1	1	0	0
50	347	P0CH32|UBQ4_ARATH	193.91	12	3	6	8	2	2	0	0	2	0	0	0	0	0	0	2	0	6	2	1.2125E5	3.5468E4	2.4469E5	2.0837E4	8.8948E3			4.6908E3							5.1159E3		9.7286E4	3.2017E4	5	5	2	2	6	1	1	0	0
50	307	Q9FHQ6|UBQ9_ARATH	193.91	15	4	7	10	3	3	0	0	3	0	0	0	0	0	0	3	0	7	3	1.2125E5	3.5468E4	2.4469E5	2.0837E4	8.8948E3			4.6908E3							5.1159E3		9.7286E4	3.2017E4	5	5	2	2	6	1	1	0	0
234	644	P34066|PSA1A_ARATH	65.22	4	0	0	0	4	0	0	0	0	0	0	0	0	0	0	0	0	0	0				6.2399E4															1	1	0	0	0	2	0	0	0
234	748	O23712|PSA1B_ARATH	65.22	4	0	0	0	4	0	0	0	0	0	0	0	0	0	0	0	0	0	0				6.2399E4															1	1	0	0	0	2	0	0	0
188	402	O23715|PSA3_ARATH	98.2	11	0	0	0	0	0	0	0	0	0	0	0	8	0	0	0	0	3	0												7.3128E4					1.5653E5		2	2	0	0	0	0	0	0	0
174	725	O81148|PSA4A_ARATH	81.53	4	0	0	0	0	0	0	0	0	0	0	0	0	0	0	0	0	4	0																	2.2972E5		1	1	0	0	0	0	0	0	0
138	255	O81149|PSA5A_ARATH	166.54	19	0	0	0	0	0	0	0	0	0	0	0	0	0	0	0	0	11	0																	3.4787E5		4	4	0	0	0	0	0	0	0
138	259	Q42134|PSA5B_ARATH	166.54	19	0	0	0	0	0	0	0	0	0	0	0	0	0	0	0	0	11	0																	3.4787E5		4	4	0	0	0	0	0	0	0
93	236	O81147|PSA6B_ARATH	191.82	15	0	0	0	0	0	0	0	8	0	0	0	0	0	0	0	0	15	0								2.5282E4									5.5631E5		4	4	0	0	0	0	0	0	0
119	359	P30186|PSA7A_ARATH	124.92	8	0	0	0	0	0	0	0	0	0	0	4	0	0	0	0	0	0	0											1.8925E4								2	2	0	0	0	0	0	0	0
119	329	O24616|PSA7B_ARATH	124.92	8	0	0	0	0	0	0	0	0	0	0	4	0	0	0	0	0	0	0											1.8925E4								2	2	0	0	0	0	0	0	0
159	1337	Q8LD27|PSB6_ARATH	76.74	4	4	0	4	0	0	0	0	0	0	0	0	0	0	0	0	0	0	0	2.0457E5		2.2991E5																1	1	4	0	4	0	0	0	0
148	645	Q7DLS1|PSB7B_ARATH	129.77	8	8	0	5	0	0	0	0	0	0	0	0	0	0	0	0	0	5	0	1.1228E5		2.7463E4														1.2383E5		3	3	4	0	2	0	0	0	0
174	1007	F4JJE5|PSA4B_ARATH	81.53	4	0	0	0	0	0	0	0	0	0	0	0	0	0	0	0	0	4	0																	2.2972E5		1	1	0	0	0	0	0	0	0
50	327	P59271|R27AA_ARATH	193.91	30	8	14	20	6	6	0	0	6	0	0	0	0	0	0	6	0	14	6	1.2125E5	3.5468E4	2.4469E5	2.0837E4	8.8948E3			4.6908E3							5.1159E3		9.7286E4	3.2017E4	5	5	2	2	6	1	1	0	0
50	328	P59232|R27AB_ARATH	193.91	30	8	14	20	6	6	0	0	6	0	0	0	0	0	0	6	0	14	6	1.2125E5	3.5468E4	2.4469E5	2.0837E4	8.8948E3			4.6908E3							5.1159E3		9.7286E4	3.2017E4	5	5	2	2	6	1	1	0	0
50	322	P59233|R27AC_ARATH	193.91	30	8	14	20	6	6	0	0	6	0	0	0	0	0	0	6	0	14	6	1.2125E5	3.5468E4	2.4469E5	2.0837E4	8.8948E3			4.6908E3							5.1159E3		9.7286E4	3.2017E4	5	5	2	2	6	1	1	0	0
50	358	B9DHA6|RL40A_ARATH	193.91	37	10	17	24	7	7	0	0	7	0	0	0	0	0	0	7	0	17	7	1.2125E5	3.5468E4	2.4469E5	2.0837E4	8.8948E3			4.6908E3							5.1159E3		9.7286E4	3.2017E4	5	5	2	2	6	1	1	0	0
50	357	Q42202|RL40B_ARATH	193.91	37	10	17	24	7	7	0	0	7	0	0	0	0	0	0	7	0	17	7	1.2125E5	3.5468E4	2.4469E5	2.0837E4	8.8948E3			4.6908E3							5.1159E3		9.7286E4	3.2017E4	5	5	2	2	6	1	1	0	0
50	303	Q9SHE7|RUB1_ARATH	193.91	30	8	14	20	6	6	0	0	6	0	0	0	0	0	0	6	0	14	6	1.2125E5	3.5468E4	2.4469E5	2.0837E4	8.8948E3			4.6908E3							5.1159E3		9.7286E4	3.2017E4	5	5	2	2	6	1	1	0	0
50	302	Q8RUC6|RUB2_ARATH	193.91	31	8	14	20	6	6	0	0	6	0	0	0	0	0	0	6	0	14	6	1.2125E5	3.5468E4	2.4469E5	2.0837E4	8.8948E3			4.6908E3							5.1159E3		9.7286E4	3.2017E4	5	5	2	2	6	1	1	0	0
325	815	Q42479|CDPK3_ARATH	56.89	2	0	0	0	0	0	2	0	0	0	0	0	0	0	0	0	0	0	0						6.3197E3													1	1	0	0	0	0	0	1	0
143	739	O24456|GBLPA_ARATH	97.82	3	0	0	0	3	0	0	0	0	0	0	0	0	0	0	0	3	0	0				3.1368E5												2.9282E3			1	1	0	0	0	3	0	0	0
143	451	Q9C4Z6|GPLPB_ARATH	97.82	3	0	0	0	3	0	0	0	0	0	0	0	0	0	0	0	3	0	0				3.1368E5												2.9282E3			1	1	0	0	0	3	0	0	0
143	604	Q9LV28|GPLPC_ARATH	97.82	3	0	0	0	3	0	0	0	0	0	0	0	0	0	0	0	3	0	0				3.1368E5												2.9282E3			1	1	0	0	0	3	0	0	0
97	107	Q6W8Q2|REHY_WHEAT	195.59	27	23	0	23	0	0	0	0	0	0	0	0	0	0	0	0	0	0	0	2.6343E5		4.5634E5																7	7	6	0	9	0	0	0	0
87	113	P25696|ENO2_ARATH	206.51	22	0	3	0	0	0	22	0	0	3	0	0	0	3	0	0	0	0	12		6.1857E4				2.6092E5			2.427E4				1.7236E3					1.2879E5	7	7	0	1	0	0	0	13	0
297	246	Q9LP45|PSD11_ARATH	59.65	2	0	0	0	0	0	0	0	0	2	0	0	0	0	0	0	0	0	0									7.8232E3										1	1	0	0	0	0	0	0	0
251	218	Q9LNU4|PSD3A_ARATH	97.77	5	0	0	0	0	0	2	0	0	0	0	0	0	0	0	0	0	0	0						7.4742E3													3	3	0	0	0	0	0	1	0
219	586	O04487|EF1G1_ARATH	75.59	2	0	2	0	0	0	0	0	0	0	0	0	0	0	0	0	0	0	2		1.7589E5																2.4377E3	1	1	0	3	0	0	0	0	0
49	116	Q9FWA3|6PGD2_ARATH	224.71	12	0	0	0	0	0	2	10	0	4	0	0	0	2	0	0	0	0	6							3.7425E3		2.7337E3									1.2935E5	6	3	0	0	0	0	0	1	8
108	283	Q9SID0|SCRK1_ARATH	128.24	7	0	0	0	7	0	0	0	0	0	0	0	0	0	7	0	7	0	0				2.4245E5										6.5165E2		1.8951E3			2	1	0	0	0	7	0	0	0
150	253	P49040|SUS1_ARATH	144.98	4	0	0	0	0	0	0	0	0	0	3	0	0	0	0	0	0	0	0										7.2114E4									4	3	0	0	0	0	0	0	0
88	366	Q9LHG9|NACA1_ARATH	176.82	15	15	0	15	0	0	0	0	15	0	0	7	0	0	0	0	0	15	0	7.0933E4		1.7045E5					2.2797E4			1.2929E4						1.3811E5		2	2	4	0	5	0	0	0	0
88	363	Q6ICZ8|NACA3_ARATH	176.82	15	15	0	15	0	0	0	0	15	0	0	7	0	0	0	0	0	15	0	7.0933E4		1.7045E5					2.2797E4			1.2929E4						1.3811E5		2	2	4	0	5	0	0	0	0
219	1083	Q9FVT2|EF1G2_ARATH	75.59	2	0	2	0	0	0	0	0	0	0	0	0	0	0	0	0	0	0	2		1.7589E5																2.4377E3	1	1	0	3	0	0	0	0	0
5	8	P32112|SAHH_WHEAT	353.76	45	0	4	2	3	0	31	0	0	0	0	0	0	0	0	0	0	0	0		2.5619E4	9.8015E3	4.7064E4		1.6214E6													22	22	0	2	1	3	0	64	0
Cytoskeleton
Protein Group	Protein ID	Accession	-10lgP	Coverage (%)	Coverage (%)																		Area																				#Spec
					Control-1	Control-2	Control-3	Control-4	Control-5	Control-6	Control-7	Control-8	Control-9	Control-10	Control-11	Control-12	Control-13	Control-14	Control-15	Control-16	Control-17	Control-18	Control-1	Control-2	Control-3	Control-4	Control-5	Control-6	Control-7	Control-8	Control-9	Control-10	Control-11	Control-12	Control-13	Control-14	Control-15	Control-16	Control-17	Control-18	#Peptides	#Unique	Control-1	Control-2	Control-3	Control-4	Control-5	Control-6	Control-7
26	26	P53496|ACT11_ARATH	296.5	37	14	17	3	19	0	0	0	5	5	0	5	0	5	0	5	5	18	7	2.6243E4			5.7401E4													0	1.8684E4	12	1	7	7	1	12	0	0	0
12	32	P53497|ACT12_ARATH	303.54	37	14	20	6	19	0	0	0	5	7	0	5	0	5	0	5	5	18	7	8.3285E4	4.8644E4	8.0772E4	1.9892E5					3.1976E3								2.1114E5	7.1767E4	12	1	8	10	4	12	0	0	0
12	31	P53494|ACT4_ARATH	303.54	37	14	20	6	19	0	0	0	5	7	0	5	0	5	0	5	5	18	7	8.3285E4	4.8644E4	8.0772E4	1.9892E5					3.1976E3								2.1114E5	7.1767E4	12	1	8	10	4	12	0	0	0
Endoplasmic reticulum
Protein Group	Protein ID	Accession	-10lgP	Coverage (%)	Coverage (%)																		Area																				#Spec
					Control-1	Control-2	Control-3	Control-4	Control-5	Control-6	Control-7	Control-8	Control-9	Control-10	Control-11	Control-12	Control-13	Control-14	Control-15	Control-16	Control-17	Control-18	Control-1	Control-2	Control-3	Control-4	Control-5	Control-6	Control-7	Control-8	Control-9	Control-10	Control-11	Control-12	Control-13	Control-14	Control-15	Control-16	Control-17	Control-18	#Peptides	#Unique	Control-1	Control-2	Control-3	Control-4	Control-5	Control-6	Control-7
189	1247	Q38858|CALR2_ARATH	117.89	7	0	0	0	0	0	7	0	0	0	0	0	0	0	0	0	0	0	0						2.23E4													3	3	0	0	0	0	0	2	0
284	608	O22263|PDI21_ARATH	70.34	3	0	0	0	3	0	0	0	0	0	0	0	0	0	0	0	0	0	0				1.5688E4															1	1	0	0	0	1	0	0	0
299	195	Q9STX5|ENPL_ARATH	69.98	2	0	0	0	0	0	0	0	0	0	2	0	0	0	0	0	0	0	0										1.8428E4									1	1	0	0	0	0	0	0	0
202	295	O04834|SAR1A_ARATH	134.57	13	0	0	13	0	0	0	0	0	0	0	0	0	0	0	0	0	0	0			4.7681E4																2	2	0	0	2	0	0	0	0
52	49	Q39043|BIP2_ARATH	252.01	14	2	8	2	0	6	0	2	0	4	8	0	0	2	0	0	0	5	4		1.6445E5			5.4531E3				3.0043E4	8.6055E4			2.7876E3				7.4526E4	1.1064E5	11	9	1	7	1	0	9	0	1
Extracellular
Protein Group	Protein ID	Accession	-10lgP	Coverage (%)	Coverage (%)																		Area																				#Spec
					Control-1	Control-2	Control-3	Control-4	Control-5	Control-6	Control-7	Control-8	Control-9	Control-10	Control-11	Control-12	Control-13	Control-14	Control-15	Control-16	Control-17	Control-18	Control-1	Control-2	Control-3	Control-4	Control-5	Control-6	Control-7	Control-8	Control-9	Control-10	Control-11	Control-12	Control-13	Control-14	Control-15	Control-16	Control-17	Control-18	#Peptides	#Unique	Control-1	Control-2	Control-3	Control-4	Control-5	Control-6	Control-7
108	312	Q9LNE4|SCRK3_ARATH	128.24	6	0	0	0	6	0	0	0	0	0	0	0	0	0	6	0	6	0	0				2.4245E5										6.5165E2		1.8951E3			2	1	0	0	0	7	0	0	0
108	364	Q9LNE3|SCRK2_ARATH	128.24	7	0	0	0	7	0	0	0	0	0	0	0	0	0	7	0	7	0	0				2.4245E5										6.5165E2		1.8951E3			2	1	0	0	0	7	0	0	0
Golgi apparatus
Protein Group	Protein ID	Accession	-10lgP	Coverage (%)	Coverage (%)																		Area																				#Spec
					Control-1	Control-2	Control-3	Control-4	Control-5	Control-6	Control-7	Control-8	Control-9	Control-10	Control-11	Control-12	Control-13	Control-14	Control-15	Control-16	Control-17	Control-18	Control-1	Control-2	Control-3	Control-4	Control-5	Control-6	Control-7	Control-8	Control-9	Control-10	Control-11	Control-12	Control-13	Control-14	Control-15	Control-16	Control-17	Control-18	#Peptides	#Unique	Control-1	Control-2	Control-3	Control-4	Control-5	Control-6	Control-7
88	363	Q6ICZ8|NACA3_ARATH	176.82	15	15	0	15	0	0	0	0	15	0	0	7	0	0	0	0	0	15	0	7.0933E4		1.7045E5					2.2797E4			1.2929E4						1.3811E5		2	2	4	0	5	0	0	0	0
122	249	O80501|RAH1B_ARATH	114.34	11	11	0	11	0	0	0	0	0	0	0	0	0	0	0	0	0	0	0	2.0989E4		3.0792E4																2	1	4	0	7	0	0	0	0
122	289	Q9SMR4|RAH1C_ARATH	114.34	10	10	0	10	0	0	0	0	0	0	0	0	0	0	0	0	0	0	0	2.0989E4		3.0792E4																2	1	4	0	7	0	0	0	0
268	1356	O64749|ARAE2_ARATH	58.83	3	0	0	0	0	0	0	0	0	3	0	0	0	0	0	0	0	0	3									8.205E3									2.7054E4	1	1	0	0	0	0	0	0	0
268	894	Q9SA77|ARAE1_ARATH	58.83	3	0	0	0	0	0	0	0	0	3	0	0	0	0	0	0	0	0	3									8.205E3									2.7054E4	1	1	0	0	0	0	0	0	0
161	130	Q9LZI2|UXS2_ARATH	165.22	13	0	0	0	13	0	0	0	0	0	0	0	0	0	0	0	0	0	2				8.6796E4														0	6	5	0	0	0	6	0	0	0
161	121	Q8S8T4|UXS4_ARATH	165.22	13	0	0	0	13	0	0	0	0	0	0	0	0	0	0	0	0	0	2				8.6796E4														0	6	5	0	0	0	6	0	0	0
63	181	Q9LNW1|RAA2B_ARATH	193.3	22	17	0	18	0	0	0	0	5	0	0	0	0	0	0	0	0	10	0	1.3758E4		1.0565E4																5	1	8	0	9	0	0	0	0
63	163	Q96283|RAA2C_ARATH	193.3	22	17	0	18	0	0	0	0	5	0	0	0	0	0	0	0	0	10	0	1.3758E4		1.0565E4																5	1	8	0	9	0	0	0	0
122	270	Q9SID8|RAH1D_ARATH	114.34	11	11	0	11	0	0	0	0	0	0	0	0	0	0	0	0	0	0	0	2.0989E4		3.0792E4																2	1	4	0	7	0	0	0	0
122	226	Q9LFT9|RAH1E_ARATH	114.34	11	11	0	11	0	0	0	0	0	0	0	0	0	0	0	0	0	0	0	2.0989E4		3.0792E4																2	1	4	0	7	0	0	0	0
202	295	O04834|SAR1A_ARATH	134.57	13	0	0	13	0	0	0	0	0	0	0	0	0	0	0	0	0	0	0			4.7681E4																2	2	0	0	2	0	0	0	0
74	109	P28186|RAE1C_ARATH	189.15	25	25	0	25	0	0	0	0	0	0	0	0	0	0	0	0	0	0	0	1.7149E5		2.3991E5																5	3	8	0	15	0	0	0	0
74	179	Q9LZD4|RAE1D_ARATH	189.15	25	25	0	25	0	0	0	0	0	0	0	0	0	0	0	0	0	0	0	1.7149E5		2.3991E5																5	3	8	0	15	0	0	0	0
Membrane
Protein Group	Protein ID	Accession	-10lgP	Coverage (%)	Coverage (%)																		Area																				#Spec
					Control-1	Control-2	Control-3	Control-4	Control-5	Control-6	Control-7	Control-8	Control-9	Control-10	Control-11	Control-12	Control-13	Control-14	Control-15	Control-16	Control-17	Control-18	Control-1	Control-2	Control-3	Control-4	Control-5	Control-6	Control-7	Control-8	Control-9	Control-10	Control-11	Control-12	Control-13	Control-14	Control-15	Control-16	Control-17	Control-18	#Peptides	#Unique	Control-1	Control-2	Control-3	Control-4	Control-5	Control-6	Control-7
116	627	Q42564|APX3_ARATH	91.83	3	0	0	0	0	0	0	0	0	0	0	3	0	0	0	0	0	3	0											1.5473E4						9.4009E5		1	1	0	0	0	0	0	0	0
116	1633	Q7XZP5|APX5_ARATH	91.83	3	0	0	0	0	0	0	0	0	0	0	3	0	0	0	0	0	3	0											1.5473E4						9.4009E5		1	1	0	0	0	0	0	0	0
235	405	P46524|CO410_WHEAT	78.3	12	5	0	5	0	0	0	0	0	0	0	0	0	0	0	0	0	0	0	1.6651E4		1.3806E4																2	2	1	0	1	0	0	0	0
184	133	P93596|CP51_WHEAT	145.7	12	0	0	0	0	0	4	3	0	0	0	0	0	0	0	0	0	0	0						2.4825E4	8.3715E3												5	5	0	0	0	0	0	2	1
155	144	Q9LS94|RAG3F_ARATH	138.85	19	16	0	16	0	0	0	0	0	0	0	0	0	0	0	0	0	0	0	1.0402E5		1.307E5																4	3	4	0	3	0	0	0	0
Mitochondrion
Protein Group	Protein ID	Accession	-10lgP	Coverage (%)	Coverage (%)																		Area																				#Spec
					Control-1	Control-2	Control-3	Control-4	Control-5	Control-6	Control-7	Control-8	Control-9	Control-10	Control-11	Control-12	Control-13	Control-14	Control-15	Control-16	Control-17	Control-18	Control-1	Control-2	Control-3	Control-4	Control-5	Control-6	Control-7	Control-8	Control-9	Control-10	Control-11	Control-12	Control-13	Control-14	Control-15	Control-16	Control-17	Control-18	#Peptides	#Unique	Control-1	Control-2	Control-3	Control-4	Control-5	Control-6	Control-7
76	39	P38076|CYSK_WHEAT	281.82	50	0	0	0	46	0	0	0	0	0	0	0	0	0	11	0	6	0	0				4.4265E5										1.5183E4		1.2485E3			12	11	0	0	0	23	0	0	0
100	68	Q9SIB9|ACO3M_ARATH	228.68	10	0	0	0	0	0	0	0	0	0	0	0	0	0	0	2	0	0	0															4.4235E4				7	2	0	0	0	0	0	0	0
62	294	P48491|TPIS_ARATH	129.02	7	7	0	7	0	0	0	0	4	0	0	0	0	0	0	0	0	7	0	1.134E6		9.3934E5					9.5041E4									5.5604E5		2	2	10	0	8	0	0	0	0
266	529	Q39243|TRXB1_ARATH	68.98	4	0	0	0	4	0	0	0	0	0	0	0	0	0	0	0	0	0	0				1.0725E4															1	1	0	0	0	1	0	0	0
266	613	Q39242|TRXB2_ARATH	68.98	4	0	0	0	4	0	0	0	0	0	0	0	0	0	0	0	0	0	0				1.0725E4															1	1	0	0	0	1	0	0	0
185	180	Q9ZPS3|DCE4_ARATH	130.17	12	0	0	0	0	0	5	2	0	0	0	0	0	0	0	0	0	0	0						6.308E3	3.7021E4												4	4	0	0	0	0	0	2	1
130	571	O48661|SPDS2_ARATH	121.02	8	0	0	0	4	0	0	0	0	0	0	0	0	0	0	0	4	0	0				1.2988E5												1.8837E3			2	2	0	0	0	5	0	0	0
87	113	P25696|ENO2_ARATH	206.51	22	0	3	0	0	0	22	0	0	3	0	0	0	3	0	0	0	0	12		6.1857E4				2.6092E5			2.427E4				1.7236E3					1.2879E5	7	7	0	1	0	0	0	13	0
196	265	Q9LDV4|ALAT2_ARATH	150.48	6	0	0	0	0	0	2	0	0	0	0	0	0	0	0	0	0	0	0						7.0388E3													3	3	0	0	0	0	0	1	0
246	136	Q94C74|GLYM2_ARATH	113.15	4	0	0	0	0	0	2	0	0	0	0	0	0	0	0	0	0	0	0						5.1162E3													2	2	0	0	0	0	0	1	0
304	553	Q94A28|ACO2M_ARATH	52.45	1	0	0	0	0	0	0	0	0	0	0	0	0	0	0	1	0	0	0															6.9443E3				1	1	0	0	0	0	0	0	0
203	3174	Q94AL9|AGT22_ARATH	67.46	2	0	2	0	0	0	0	0	0	0	0	0	0	0	0	0	0	0	2		1.3472E5																2.8686E3	1	1	0	3	0	0	0	0	0
216	413	P20115|CISY4_ARATH	120	4	0	4	0	0	0	0	0	0	2	0	0	0	2	0	0	0	0	2		6.1336E4																	2	1	0	2	0	0	0	0	0
136	167	Q9M1D3|CISY5_ARATH	186.05	12	0	7	0	0	0	0	0	0	7	0	0	0	4	0	0	0	0	7		1.1434E5							6.6832E4				6.1894E2					3.2784E5	5	4	0	4	0	0	0	0	0
245	839	Q9FLQ4|ODO2A_ARATH	58.05	2	0	0	0	0	0	0	0	0	2	0	0	0	0	0	0	0	0	0									1.6499E4										1	1	0	0	0	0	0	0	0
245	479	Q8H107|ODO2B_ARATH	58.05	2	0	0	0	0	0	0	0	0	2	0	0	0	0	0	0	0	0	0									1.6499E4										1	1	0	0	0	0	0	0	0
125	152	Q9ZP06|MDHM1_ARATH	214.12	19	0	0	0	16	0	0	0	0	0	0	0	0	0	3	0	4	0	0				7.7933E5												3.9961E3			7	5	0	0	0	9	0	0	0
29	7	P12862|ATPAM_WHEAT	304.66	41	2	2	0	2	0	29	0	0	0	0	0	0	0	0	0	0	0	0		0		1.8396E4		3.9763E5													17	10	2	1	0	1	0	29	0
58	42	P83483|ATPBM_ARATH	254.58	24	0	0	0	0	0	20	0	0	0	0	0	0	0	0	0	0	0	0						4.8952E5													10	10	0	0	0	0	0	21	0
58	43	P83484|ATPBN_ARATH	254.58	24	0	0	0	0	0	20	0	0	0	0	0	0	0	0	0	0	0	0						4.8952E5													10	10	0	0	0	0	0	21	0
58	47	Q9C5A9|ATPBO_ARATH	254.58	24	0	0	0	0	0	20	0	0	0	0	0	0	0	0	0	0	0	0						4.8952E5													10	10	0	0	0	0	0	21	0
218	337	Q96250|ATPG3_ARATH	112.26	5	0	0	0	2	0	0	0	0	0	0	0	0	0	0	0	0	0	0				3.8401E4															2	2	0	0	0	1	0	0	0
152	395	Q95748|NDUS3_ARATH	126.96	12	12	0	12	0	0	0	0	0	0	0	0	0	0	0	0	0	0	0	5.5685E4		1.8949E5																2	2	3	0	4	0	0	0	0
298	321	F4JFN3|HS906_ARATH	51.66	2	0	0	0	0	0	0	0	0	0	2	0	0	0	0	0	0	0	0										9.0368E3									1	1	0	0	0	0	0	0	0
34	86	P31167|ADT1_ARATH	261.82	23	0	0	0	0	0	0	0	0	0	0	9	0	0	0	0	0	0	0											1.0302E4								11	2	0	0	0	0	0	0	0
94	94	P46274|VDAC1_WHEAT	221.35	28	0	0	0	0	0	0	0	0	0	0	4	0	0	0	0	0	23	0											2.0658E4						1.9601E5		7	7	0	0	0	0	0	0	0
208	911	Q9FJX3|VDAC2_ARATH	83.05	4	0	0	0	0	0	0	0	0	0	0	4	0	0	0	0	0	0	0											1.3804E4								1	1	0	0	0	0	0	0	0
201	420	Q9M2Z8|MPCP2_ARATH	102.96	5	0	0	0	2	0	0	0	0	0	0	0	0	0	0	0	0	0	0				3.1279E5															2	2	0	0	0	2	0	0	0
265	331	Q39026|MPK6_ARATH	98.99	6	0	3	0	0	0	0	0	0	0	0	0	0	0	0	0	0	0	2		1.2418E4																3.1216E4	3	3	0	1	0	0	0	0	0
Nucleus
Protein Group	Protein ID	Accession	-10lgP	Coverage (%)	Coverage (%)																		Area																				#Spec
					Control-1	Control-2	Control-3	Control-4	Control-5	Control-6	Control-7	Control-8	Control-9	Control-10	Control-11	Control-12	Control-13	Control-14	Control-15	Control-16	Control-17	Control-18	Control-1	Control-2	Control-3	Control-4	Control-5	Control-6	Control-7	Control-8	Control-9	Control-10	Control-11	Control-12	Control-13	Control-14	Control-15	Control-16	Control-17	Control-18	#Peptides	#Unique	Control-1	Control-2	Control-3	Control-4	Control-5	Control-6	Control-7
156	229	Q9LQQ4|H2B1_ARATH	145.72	20	7	0	14	0	0	0	0	0	0	0	0	0	0	0	0	0	0	0	3.032E4		7.9055E4																3	3	1	0	3	0	0	0	0
156	223	P27807|H2B1_WHEAT	145.72	20	7	0	14	0	0	0	0	0	0	0	0	0	0	0	0	0	0	0	3.032E4		7.9055E4																3	3	1	0	3	0	0	0	0
156	296	Q9FFC0|H2B10_ARATH	145.72	21	8	0	14	0	0	0	0	0	0	0	0	0	0	0	0	0	0	0	3.032E4		7.9055E4																3	3	1	0	3	0	0	0	0
156	300	P40283|H2B11_ARATH	145.72	20	7	0	14	0	0	0	0	0	0	0	0	0	0	0	0	0	0	0	3.032E4		7.9055E4																3	3	1	0	3	0	0	0	0
156	203	P05621|H2B2_WHEAT	145.72	20	7	0	14	0	0	0	0	0	0	0	0	0	0	0	0	0	0	0	3.032E4		7.9055E4																3	3	1	0	3	0	0	0	0
156	278	Q9SI96|H2B3_ARATH	145.72	20	7	0	14	0	0	0	0	0	0	0	0	0	0	0	0	0	0	0	3.032E4		7.9055E4																3	3	1	0	3	0	0	0	0
156	240	Q43217|H2B3_WHEAT	145.72	22	8	0	15	0	0	0	0	0	0	0	0	0	0	0	0	0	0	0	3.032E4		7.9055E4																3	3	1	0	3	0	0	0	0
156	284	Q43215|H2B4_WHEAT	145.72	22	8	0	16	0	0	0	0	0	0	0	0	0	0	0	0	0	0	0	3.032E4		7.9055E4																3	3	1	0	3	0	0	0	0
156	196	Q43216|H2B5_WHEAT	145.72	22	8	0	15	0	0	0	0	0	0	0	0	0	0	0	0	0	0	0	3.032E4		7.9055E4																3	3	1	0	3	0	0	0	0
156	313	O23629|H2B6_ARATH	145.72	20	7	0	14	0	0	0	0	0	0	0	0	0	0	0	0	0	0	0	3.032E4		7.9055E4																3	3	1	0	3	0	0	0	0
156	273	Q9LZT0|H2B7_ARATH	145.72	21	8	0	14	0	0	0	0	0	0	0	0	0	0	0	0	0	0	0	3.032E4		7.9055E4																3	3	1	0	3	0	0	0	0
102	297	P59259|H4_ARATH	139.66	31	19	12	10	21	0	0	0	0	0	0	0	0	0	0	0	0	31	12	3.3249E4	1.5487E4	5.0791E4	2.2593E4													1.218E5	1.9058E4	3	3	2	1	1	2	0	0	0
102	298	P62785|H41_WHEAT	139.66	31	19	12	10	21	0	0	0	0	0	0	0	0	0	0	0	0	31	12	3.3249E4	1.5487E4	5.0791E4	2.2593E4													1.218E5	1.9058E4	3	3	2	1	1	2	0	0	0
102	293	P62786|H42_WHEAT	139.66	31	19	12	10	21	0	0	0	0	0	0	0	0	0	0	0	0	31	12	3.3249E4	1.5487E4	5.0791E4	2.2593E4													1.218E5	1.9058E4	3	3	2	1	1	2	0	0	0
43	211	P42644|14333_ARATH	211.9	20	0	0	0	0	0	0	0	3	0	4	7	0	0	0	0	0	6	0																	4.0782E4		7	1	0	0	0	0	0	0	0
54	162	P25858|G3PC1_ARATH	195.26	20	4	4	9	17	0	0	0	4	0	0	0	0	0	0	4	0	9	9	9.7725E4	4.6092E4	8.3394E4	3.7565E5				2.203E4							3.2231E3		1.2975E5	6.4284E4	5	5	3	1	3	8	0	0	0
54	141	Q9FX54|G3PC2_ARATH	195.26	20	4	4	9	17	0	0	0	4	0	0	0	0	0	0	4	0	9	9	9.7725E4	4.6092E4	8.3394E4	3.7565E5				2.203E4							3.2231E3		1.2975E5	6.4284E4	5	5	3	1	3	8	0	0	0
16	137	Q96300|14337_ARATH	245.19	26	5	0	0	5	0	0	0	3	0	4	7	0	0	0	0	0	15	0																	1.5665E5		10	3	1	0	0	1	0	0	0
7	108	Q9FZE1|UGDH1_ARATH	262.33	18	2	10	2	5	0	7	7	0	12	2	5	0	7	0	5	2	5	13		200000				5.3604E3	5.8002E3		8.6725E4									2.3892E5	8	3	1	16	1	2	0	8	6
8	69	Q9LIA8|UGDH2_ARATH	252.35	21	2	14	2	5	0	5	13	0	13	2	5	0	9	0	5	2	5	11		2.9752E4					6.1988E4		1.5844E4				2.9944E3					6.6359E3	9	4	1	15	1	2	0	7	7
166	353	Q94A52|RH2_ARATH	116.99	5	0	3	0	0	0	0	0	0	2	0	0	0	0	0	0	0	0	2		3.2638E4																	3	1	0	1	0	0	0	0	0
180	333	P29557|IF4E1_WHEAT	136.3	12	6	0	12	0	0	0	0	0	0	0	0	0	0	0	0	0	0	0	4.0659E4		5.2684E4																2	2	1	0	3	0	0	0	0
146	187	Q9FIB6|PS12A_ARATH	162.43	8	2	0	0	0	0	0	0	0	6	0	0	0	0	0	0	0	0	6	1.0862E5								4.5185E4									1.6968E5	4	4	1	0	0	0	0	0	0
110	238	Q9SEI2|PS6AA_ARATH	119.57	6	3	6	0	0	0	0	0	0	0	0	3	0	0	0	0	0	0	3		2.7212E4																	2	1	2	3	0	0	0	0	0
110	263	O04019|PS6AB_ARATH	119.57	6	3	6	0	0	0	0	0	0	0	0	3	0	0	0	0	0	0	3		2.7212E4																	2	1	2	3	0	0	0	0	0
89	83	Q9SEI4|PRS6B_ARATH	202.66	17	3	5	0	0	0	0	0	0	0	0	3	0	0	0	0	0	0	5		1.0367E4																1.3256E4	6	5	2	3	0	0	0	0	0
14	6	P22953|HS701_ARATH	312.12	29	5	6	9	2	23	0	2	2	5	16	2	0	0	0	0	0	11	2		2.4524E4			2.3601E4				2.078E3									1.1779E4	18	1	2	5	5	1	33	0	1
129	135	Q9S7C0|HSP7O_ARATH	180.05	6	0	0	0	0	0	0	0	0	0	0	0	0	0	0	1	0	0	0															7.9416E3				5	5	0	0	0	0	0	0	0
129	134	F4HQD4|HSP7P_ARATH	180.05	6	0	0	0	0	0	0	0	0	0	0	0	0	0	0	1	0	0	0															7.9416E3				5	5	0	0	0	0	0	0	0
20	5	P22954|HS702_ARATH	305.59	32	5	4	9	2	24	0	2	2	2	18	2	0	0	0	0	0	11	0										3.46E4									18	2	2	2	5	1	28	0	1
21	11	O65719|HSP7C_ARATH	278.51	29	5	4	9	2	23	0	2	2	2	19	2	0	0	0	0	0	11	0					4.937E4					9.1803E4									15	1	2	2	5	1	27	0	1
50	348	Q8H159|UBQ10_ARATH	193.91	10	3	5	7	2	2	0	0	2	0	0	0	0	0	0	2	0	5	2	1.2125E5	3.5468E4	2.4469E5	2.0837E4	8.8948E3			4.6908E3							5.1159E3		9.7286E4	3.2017E4	5	5	2	2	6	1	1	0	0
50	344	P0CH33|UBQ11_ARATH	193.91	21	6	10	14	4	4	0	0	4	0	0	0	0	0	0	4	0	10	4	1.2125E5	3.5468E4	2.4469E5	2.0837E4	8.8948E3			4.6908E3							5.1159E3		9.7286E4	3.2017E4	5	5	2	2	6	1	1	0	0
50	290	Q3E7K8|UBQ12_ARATH	193.91	20	6	10	13	4	4	0	0	4	0	0	0	0	0	0	4	0	10	4	1.2125E5	3.5468E4	2.4469E5	2.0837E4	8.8948E3			4.6908E3							5.1159E3		9.7286E4	3.2017E4	5	5	2	2	6	1	1	0	0
50	345	Q3E7T8|UBQ14_ARATH	193.91	15	4	7	10	3	3	0	0	3	0	0	0	0	0	0	3	0	7	3	1.2125E5	3.5468E4	2.4469E5	2.0837E4	8.8948E3			4.6908E3							5.1159E3		9.7286E4	3.2017E4	5	5	2	2	6	1	1	0	0
50	346	Q1EC66|UBQ3_ARATH	193.91	15	4	7	10	3	3	0	0	3	0	0	0	0	0	0	3	0	7	3	1.2125E5	3.5468E4	2.4469E5	2.0837E4	8.8948E3			4.6908E3							5.1159E3		9.7286E4	3.2017E4	5	5	2	2	6	1	1	0	0
50	347	P0CH32|UBQ4_ARATH	193.91	12	3	6	8	2	2	0	0	2	0	0	0	0	0	0	2	0	6	2	1.2125E5	3.5468E4	2.4469E5	2.0837E4	8.8948E3			4.6908E3							5.1159E3		9.7286E4	3.2017E4	5	5	2	2	6	1	1	0	0
50	307	Q9FHQ6|UBQ9_ARATH	193.91	15	4	7	10	3	3	0	0	3	0	0	0	0	0	0	3	0	7	3	1.2125E5	3.5468E4	2.4469E5	2.0837E4	8.8948E3			4.6908E3							5.1159E3		9.7286E4	3.2017E4	5	5	2	2	6	1	1	0	0
234	644	P34066|PSA1A_ARATH	65.22	4	0	0	0	4	0	0	0	0	0	0	0	0	0	0	0	0	0	0				6.2399E4															1	1	0	0	0	2	0	0	0
234	748	O23712|PSA1B_ARATH	65.22	4	0	0	0	4	0	0	0	0	0	0	0	0	0	0	0	0	0	0				6.2399E4															1	1	0	0	0	2	0	0	0
188	402	O23715|PSA3_ARATH	98.2	11	0	0	0	0	0	0	0	0	0	0	0	8	0	0	0	0	3	0												7.3128E4					1.5653E5		2	2	0	0	0	0	0	0	0
174	725	O81148|PSA4A_ARATH	81.53	4	0	0	0	0	0	0	0	0	0	0	0	0	0	0	0	0	4	0																	2.2972E5		1	1	0	0	0	0	0	0	0
138	255	O81149|PSA5A_ARATH	166.54	19	0	0	0	0	0	0	0	0	0	0	0	0	0	0	0	0	11	0																	3.4787E5		4	4	0	0	0	0	0	0	0
138	259	Q42134|PSA5B_ARATH	166.54	19	0	0	0	0	0	0	0	0	0	0	0	0	0	0	0	0	11	0																	3.4787E5		4	4	0	0	0	0	0	0	0
93	236	O81147|PSA6B_ARATH	191.82	15	0	0	0	0	0	0	0	8	0	0	0	0	0	0	0	0	15	0								2.5282E4									5.5631E5		4	4	0	0	0	0	0	0	0
119	359	P30186|PSA7A_ARATH	124.92	8	0	0	0	0	0	0	0	0	0	0	4	0	0	0	0	0	0	0											1.8925E4								2	2	0	0	0	0	0	0	0
119	329	O24616|PSA7B_ARATH	124.92	8	0	0	0	0	0	0	0	0	0	0	4	0	0	0	0	0	0	0											1.8925E4								2	2	0	0	0	0	0	0	0
159	1337	Q8LD27|PSB6_ARATH	76.74	4	4	0	4	0	0	0	0	0	0	0	0	0	0	0	0	0	0	0	2.0457E5		2.2991E5																1	1	4	0	4	0	0	0	0
148	645	Q7DLS1|PSB7B_ARATH	129.77	8	8	0	5	0	0	0	0	0	0	0	0	0	0	0	0	0	5	0	1.1228E5		2.7463E4														1.2383E5		3	3	4	0	2	0	0	0	0
174	1007	F4JJE5|PSA4B_ARATH	81.53	4	0	0	0	0	0	0	0	0	0	0	0	0	0	0	0	0	4	0																	2.2972E5		1	1	0	0	0	0	0	0	0
50	327	P59271|R27AA_ARATH	193.91	30	8	14	20	6	6	0	0	6	0	0	0	0	0	0	6	0	14	6	1.2125E5	3.5468E4	2.4469E5	2.0837E4	8.8948E3			4.6908E3							5.1159E3		9.7286E4	3.2017E4	5	5	2	2	6	1	1	0	0
50	328	P59232|R27AB_ARATH	193.91	30	8	14	20	6	6	0	0	6	0	0	0	0	0	0	6	0	14	6	1.2125E5	3.5468E4	2.4469E5	2.0837E4	8.8948E3			4.6908E3							5.1159E3		9.7286E4	3.2017E4	5	5	2	2	6	1	1	0	0
50	322	P59233|R27AC_ARATH	193.91	30	8	14	20	6	6	0	0	6	0	0	0	0	0	0	6	0	14	6	1.2125E5	3.5468E4	2.4469E5	2.0837E4	8.8948E3			4.6908E3							5.1159E3		9.7286E4	3.2017E4	5	5	2	2	6	1	1	0	0
50	358	B9DHA6|RL40A_ARATH	193.91	37	10	17	24	7	7	0	0	7	0	0	0	0	0	0	7	0	17	7	1.2125E5	3.5468E4	2.4469E5	2.0837E4	8.8948E3			4.6908E3							5.1159E3		9.7286E4	3.2017E4	5	5	2	2	6	1	1	0	0
50	357	Q42202|RL40B_ARATH	193.91	37	10	17	24	7	7	0	0	7	0	0	0	0	0	0	7	0	17	7	1.2125E5	3.5468E4	2.4469E5	2.0837E4	8.8948E3			4.6908E3							5.1159E3		9.7286E4	3.2017E4	5	5	2	2	6	1	1	0	0
50	303	Q9SHE7|RUB1_ARATH	193.91	30	8	14	20	6	6	0	0	6	0	0	0	0	0	0	6	0	14	6	1.2125E5	3.5468E4	2.4469E5	2.0837E4	8.8948E3			4.6908E3							5.1159E3		9.7286E4	3.2017E4	5	5	2	2	6	1	1	0	0
50	302	Q8RUC6|RUB2_ARATH	193.91	31	8	14	20	6	6	0	0	6	0	0	0	0	0	0	6	0	14	6	1.2125E5	3.5468E4	2.4469E5	2.0837E4	8.8948E3			4.6908E3							5.1159E3		9.7286E4	3.2017E4	5	5	2	2	6	1	1	0	0
325	815	Q42479|CDPK3_ARATH	56.89	2	0	0	0	0	0	2	0	0	0	0	0	0	0	0	0	0	0	0						6.3197E3													1	1	0	0	0	0	0	1	0
143	739	O24456|GBLPA_ARATH	97.82	3	0	0	0	3	0	0	0	0	0	0	0	0	0	0	0	3	0	0				3.1368E5												2.9282E3			1	1	0	0	0	3	0	0	0
143	451	Q9C4Z6|GPLPB_ARATH	97.82	3	0	0	0	3	0	0	0	0	0	0	0	0	0	0	0	3	0	0				3.1368E5												2.9282E3			1	1	0	0	0	3	0	0	0
143	604	Q9LV28|GPLPC_ARATH	97.82	3	0	0	0	3	0	0	0	0	0	0	0	0	0	0	0	3	0	0				3.1368E5												2.9282E3			1	1	0	0	0	3	0	0	0
97	107	Q6W8Q2|REHY_WHEAT	195.59	27	23	0	23	0	0	0	0	0	0	0	0	0	0	0	0	0	0	0	2.6343E5		4.5634E5																7	7	6	0	9	0	0	0	0
87	113	P25696|ENO2_ARATH	206.51	22	0	3	0	0	0	22	0	0	3	0	0	0	3	0	0	0	0	12		6.1857E4				2.6092E5			2.427E4				1.7236E3					1.2879E5	7	7	0	1	0	0	0	13	0
297	246	Q9LP45|PSD11_ARATH	59.65	2	0	0	0	0	0	0	0	0	2	0	0	0	0	0	0	0	0	0									7.8232E3										1	1	0	0	0	0	0	0	0
251	218	Q9LNU4|PSD3A_ARATH	97.77	5	0	0	0	0	0	2	0	0	0	0	0	0	0	0	0	0	0	0						7.4742E3													3	3	0	0	0	0	0	1	0
219	586	O04487|EF1G1_ARATH	75.59	2	0	2	0	0	0	0	0	0	0	0	0	0	0	0	0	0	0	2		1.7589E5																2.4377E3	1	1	0	3	0	0	0	0	0
127	243	Q96327|EBP1_ARATH	149.83	7	0	2	0	5	0	0	0	0	0	0	0	0	0	0	0	0	0	3		1.3341E4		9.1783E4														7.5077E4	3	3	0	2	0	2	0	0	0
186	285	Q9LT08|PSDE_ARATH	111.79	6	0	0	0	4	0	0	0	0	0	0	0	0	0	0	0	0	0	0				7.5666E4															2	2	0	0	0	2	0	0	0
221	573	Q9LPT6|OTU2_ARATH	72.73	5	0	0	0	0	0	0	0	5	0	0	0	0	0	0	0	0	5	0								9.6643E3									4.5142E4		1	1	0	0	0	0	0	0	0
123	396	Q9FEF8|FBRL1_ARATH	120	7	4	0	4	4	0	0	0	4	4	0	4	0	0	4	0	4	4	4	6.4275E3		1.0623E4	4.7766E4				1.3977E4	3.0462E3		0			3.7979E2		1.2452E3	1.3902E4	4.8438E3	2	2	1	0	1	1	0	0	0
123	389	Q94AH9|FBRL2_ARATH	120	7	3	0	3	3	0	0	0	3	3	0	3	0	0	3	0	3	3	3	6.4275E3		1.0623E4	4.7766E4				1.3977E4	3.0462E3		0			3.7979E2		1.2452E3	1.3902E4	4.8438E3	2	2	1	0	1	1	0	0	0
13	157	P41916|RAN1_ARATH	254.97	36	13	0	5	0	0	0	0	15	0	0	15	0	0	0	0	0	22	0	2.0106E5		5.8757E4					1.0388E5			9.7245E4						2.796E6		9	9	4	0	2	0	0	0	0
13	158	P41917|RAN2_ARATH	254.97	36	13	0	5	0	0	0	0	15	0	0	15	0	0	0	0	0	22	0	2.0106E5		5.8757E4					1.0388E5			9.7245E4						2.796E6		9	9	4	0	2	0	0	0	0
13	159	Q8H156|RAN3_ARATH	254.97	36	13	0	5	0	0	0	0	15	0	0	15	0	0	0	0	0	22	0	2.0106E5		5.8757E4					1.0388E5			9.7245E4						2.796E6		9	9	4	0	2	0	0	0	0
52	49	Q39043|BIP2_ARATH	252.01	14	2	8	2	0	6	0	2	0	4	8	0	0	2	0	0	0	5	4		1.6445E5			5.4531E3				3.0043E4	8.6055E4			2.7876E3				7.4526E4	1.1064E5	11	9	1	7	1	0	9	0	1
Plasma membrane
Protein Group	Protein ID	Accession	-10lgP	Coverage (%)	Coverage (%)																		Area																				#Spec
					Control-1	Control-2	Control-3	Control-4	Control-5	Control-6	Control-7	Control-8	Control-9	Control-10	Control-11	Control-12	Control-13	Control-14	Control-15	Control-16	Control-17	Control-18	Control-1	Control-2	Control-3	Control-4	Control-5	Control-6	Control-7	Control-8	Control-9	Control-10	Control-11	Control-12	Control-13	Control-14	Control-15	Control-16	Control-17	Control-18	#Peptides	#Unique	Control-1	Control-2	Control-3	Control-4	Control-5	Control-6	Control-7
130	571	O48661|SPDS2_ARATH	121.02	8	0	0	0	4	0	0	0	0	0	0	0	0	0	0	0	4	0	0				1.2988E5												1.8837E3			2	2	0	0	0	5	0	0	0
297	246	Q9LP45|PSD11_ARATH	59.65	2	0	0	0	0	0	0	0	0	2	0	0	0	0	0	0	0	0	0									7.8232E3										1	1	0	0	0	0	0	0	0
108	283	Q9SID0|SCRK1_ARATH	128.24	7	0	0	0	7	0	0	0	0	0	0	0	0	0	7	0	7	0	0				2.4245E5										6.5165E2		1.8951E3			2	1	0	0	0	7	0	0	0
258	128	Q9SSB5|PRS7A_ARATH	100.52	7	0	0	0	0	0	0	4	0	0	0	0	0	0	0	0	0	0	0							9.1085E3												2	2	0	0	0	0	0	0	1
170	559	Q8LAY8|P2C69_ARATH	112.37	5	0	0	0	5	0	0	0	0	0	0	0	0	0	0	0	0	0	0				6.386E4															2	1	0	0	0	5	0	0	0
178	772	O23016|KCAB_ARATH	76.8	3	0	0	0	3	0	0	0	0	0	0	0	0	0	0	0	0	0	0				1.0762E5															1	1	0	0	0	3	0	0	0
45	173	Q9FJH0|RAA1F_ARATH	208.9	26	26	0	23	0	0	0	0	5	0	0	5	0	0	0	0	0	15	0	2.6044E5		2.4044E5								6.2427E3						4.4188E4		6	1	13	0	14	0	0	0	0
45	117	Q9LK99|RAA1G_ARATH	208.9	26	26	0	23	0	0	0	0	5	0	0	5	0	0	0	0	0	15	0	2.6044E5		2.4044E5								6.2427E3						4.4188E4		6	1	13	0	14	0	0	0	0
86	204	Q9FJN8|RAA4A_ARATH	169.86	16	10	0	5	0	0	0	0	5	0	0	0	0	0	0	0	0	16	0																	3.1823E4		4	1	4	0	5	0	0	0	0
99	349	Q9SIP0|RAA5D_ARATH	153.2	15	5	0	11	0	0	0	0	0	0	0	0	0	0	0	0	0	9	0			3.4502E4																3	1	3	0	6	0	0	0	0
151	147	P92963|RAB1C_ARATH	192.48	35	13	0	19	0	0	0	0	0	0	0	0	0	0	0	0	0	0	0	1.8755E5		5.0347E4																6	6	2	0	5	0	0	0	0
240	905	Q9SJ11|RABG2_ARATH	72.38	5	0	0	5	0	0	0	0	0	0	0	0	0	0	0	0	0	0	0			2.4044E5																1	1	0	0	1	0	0	0	0
240	948	Q948K8|RAG3A_ARATH	72.38	5	0	0	5	0	0	0	0	0	0	0	0	0	0	0	0	0	0	0			2.4044E5																1	1	0	0	1	0	0	0	0
74	109	P28186|RAE1C_ARATH	189.15	25	25	0	25	0	0	0	0	0	0	0	0	0	0	0	0	0	0	0	1.7149E5		2.3991E5																5	3	8	0	15	0	0	0	0
74	179	Q9LZD4|RAE1D_ARATH	189.15	25	25	0	25	0	0	0	0	0	0	0	0	0	0	0	0	0	0	0	1.7149E5		2.3991E5																5	3	8	0	15	0	0	0	0
Plasmodesma
Protein Group	Protein ID	Accession	-10lgP	Coverage (%)	Coverage (%)																		Area																				#Spec
					Control-1	Control-2	Control-3	Control-4	Control-5	Control-6	Control-7	Control-8	Control-9	Control-10	Control-11	Control-12	Control-13	Control-14	Control-15	Control-16	Control-17	Control-18	Control-1	Control-2	Control-3	Control-4	Control-5	Control-6	Control-7	Control-8	Control-9	Control-10	Control-11	Control-12	Control-13	Control-14	Control-15	Control-16	Control-17	Control-18	#Peptides	#Unique	Control-1	Control-2	Control-3	Control-4	Control-5	Control-6	Control-7
219	1083	Q9FVT2|EF1G2_ARATH	75.59	2	0	2	0	0	0	0	0	0	0	0	0	0	0	0	0	0	0	2		1.7589E5																2.4377E3	1	1	0	3	0	0	0	0	0
150	253	P49040|SUS1_ARATH	144.98	4	0	0	0	0	0	0	0	0	0	3	0	0	0	0	0	0	0	0										7.2114E4									4	3	0	0	0	0	0	0	0
88	366	Q9LHG9|NACA1_ARATH	176.82	15	15	0	15	0	0	0	0	15	0	0	7	0	0	0	0	0	15	0	7.0933E4		1.7045E5					2.2797E4			1.2929E4						1.3811E5		2	2	4	0	5	0	0	0	0
88	363	Q6ICZ8|NACA3_ARATH	176.82	15	15	0	15	0	0	0	0	15	0	0	7	0	0	0	0	0	15	0	7.0933E4		1.7045E5					2.2797E4			1.2929E4						1.3811E5		2	2	4	0	5	0	0	0	0
108	364	Q9LNE3|SCRK2_ARATH	128.24	7	0	0	0	7	0	0	0	0	0	0	0	0	0	7	0	7	0	0				2.4245E5										6.5165E2		1.8951E3			2	1	0	0	0	7	0	0	0
251	218	Q9LNU4|PSD3A_ARATH	97.77	5	0	0	0	0	0	2	0	0	0	0	0	0	0	0	0	0	0	0						7.4742E3													3	3	0	0	0	0	0	1	0
219	586	O04487|EF1G1_ARATH	75.59	2	0	2	0	0	0	0	0	0	0	0	0	0	0	0	0	0	0	2		1.7589E5																2.4377E3	1	1	0	3	0	0	0	0	0
Peroxisome
Protein Group	Protein ID	Accession	-10lgP	Coverage (%)	Coverage (%)																		Area																				#Spec
					Control-1	Control-2	Control-3	Control-4	Control-5	Control-6	Control-7	Control-8	Control-9	Control-10	Control-11	Control-12	Control-13	Control-14	Control-15	Control-16	Control-17	Control-18	Control-1	Control-2	Control-3	Control-4	Control-5	Control-6	Control-7	Control-8	Control-9	Control-10	Control-11	Control-12	Control-13	Control-14	Control-15	Control-16	Control-17	Control-18	#Peptides	#Unique	Control-1	Control-2	Control-3	Control-4	Control-5	Control-6	Control-7
49	116	Q9FWA3|6PGD2_ARATH	224.71	12	0	0	0	0	0	2	10	0	4	0	0	0	2	0	0	0	0	6							3.7425E3		2.7337E3									1.2935E5	6	3	0	0	0	0	0	1	8
108	283	Q9SID0|SCRK1_ARATH	128.24	7	0	0	0	7	0	0	0	0	0	0	0	0	0	7	0	7	0	0				2.4245E5										6.5165E2		1.8951E3			2	1	0	0	0	7	0	0	0
230	4501	O04420|URIC_ARATH	72.32	3	0	0	0	3	0	0	0	0	0	0	0	0	0	0	0	0	0	0				2.6206E4															1	1	0	0	0	1	0	0	0
Secreted
Protein Group	Protein ID	Accession	-10lgP	Coverage (%)	Coverage (%)																		Area																				#Spec
					Control-1	Control-2	Control-3	Control-4	Control-5	Control-6	Control-7	Control-8	Control-9	Control-10	Control-11	Control-12	Control-13	Control-14	Control-15	Control-16	Control-17	Control-18	Control-1	Control-2	Control-3	Control-4	Control-5	Control-6	Control-7	Control-8	Control-9	Control-10	Control-11	Control-12	Control-13	Control-14	Control-15	Control-16	Control-17	Control-18	#Peptides	#Unique	Control-1	Control-2	Control-3	Control-4	Control-5	Control-6	Control-7
219	1083	Q9FVT2|EF1G2_ARATH	75.59	2	0	2	0	0	0	0	0	0	0	0	0	0	0	0	0	0	0	2		1.7589E5																2.4377E3	1	1	0	3	0	0	0	0	0
219	586	O04487|EF1G1_ARATH	75.59	2	0	2	0	0	0	0	0	0	0	0	0	0	0	0	0	0	0	2		1.7589E5																2.4377E3	1	1	0	3	0	0	0	0	0
276	486	Q9LV34|BGL43_ARATH	58.06	2	0	0	0	0	0	2	0	0	0	0	0	0	0	0	0	0	0	0						4.8758E3													1	1	0	0	0	0	0	1	0
25	71	Q05855|PER1_WHEAT	311.61	49	4	0	0	0	0	0	0	0	0	0	18	0	0	0	0	0	0	0	0										7.9599E4								12	11	1	0	0	0	0	0	0
103	232	Q8L5C6|XIP1_WHEAT	214.49	15	0	0	0	0	0	0	0	0	0	0	10	0	0	0	0	0	3	0											3.7534E4						6.5829E4		5	5	0	0	0	0	0	0	0
133	110	Q41593|SPZ1A_WHEAT	188.22	19	0	0	0	0	0	0	0	0	0	0	6	0	0	0	0	0	0	0											3.3187E3								7	2	0	0	0	0	0	0	0
Vacuole
Protein Group	Protein ID	Accession	-10lgP	Coverage (%)	Coverage (%)																		Area																				#Spec
					Control-1	Control-2	Control-3	Control-4	Control-5	Control-6	Control-7	Control-8	Control-9	Control-10	Control-11	Control-12	Control-13	Control-14	Control-15	Control-16	Control-17	Control-18	Control-1	Control-2	Control-3	Control-4	Control-5	Control-6	Control-7	Control-8	Control-9	Control-10	Control-11	Control-12	Control-13	Control-14	Control-15	Control-16	Control-17	Control-18	#Peptides	#Unique	Control-1	Control-2	Control-3	Control-4	Control-5	Control-6	Control-7
5	8	P32112|SAHH_WHEAT	353.76	45	0	4	2	3	0	31	0	0	0	0	0	0	0	0	0	0	0	0		2.5619E4	9.8015E3	4.7064E4		1.6214E6													22	22	0	2	1	3	0	64	0
219	1083	Q9FVT2|EF1G2_ARATH	75.59	2	0	2	0	0	0	0	0	0	0	0	0	0	0	0	0	0	0	2		1.7589E5																2.4377E3	1	1	0	3	0	0	0	0	0
219	586	O04487|EF1G1_ARATH	75.59	2	0	2	0	0	0	0	0	0	0	0	0	0	0	0	0	0	0	2		1.7589E5																2.4377E3	1	1	0	3	0	0	0	0	0
155	144	Q9LS94|RAG3F_ARATH	138.85	19	16	0	16	0	0	0	0	0	0	0	0	0	0	0	0	0	0	0	1.0402E5		1.307E5																4	3	4	0	3	0	0	0	0
150	308	Q9LXL5|SUS4_ARATH	144.98	4	0	0	0	0	0	0	0	0	0	3	0	0	0	0	0	0	0	0										7.2114E4									4	3	0	0	0	0	0	0	0
78	22	P11574|VATB1_ARATH	250.32	43	7	0	0	0	0	34	0	0	0	0	0	0	0	0	0	0	0	0						1.5958E5													13	1	3	0	0	0	0	18	0
77	14	Q9SZN1|VATB2_ARATH	257.09	45	7	0	0	0	0	34	0	0	0	0	0	0	0	0	0	0	0	0						2.2642E4													14	2	3	0	0	0	0	18	0
78	19	Q8W4E2|VATB3_ARATH	250.32	43	7	0	0	0	0	34	0	0	0	0	0	0	0	0	0	0	0	0						1.5958E5													13	1	3	0	0	0	0	18	0
223	352	Q41396|VATE_SPIOL	86.81	7	0	0	0	3	0	0	0	0	0	0	0	0	0	0	0	0	0	0				6.5712E4															2	1	0	0	0	2	0	0	0
223	365	Q39258|VATE1_ARATH	86.81	7	0	0	0	3	0	0	0	0	0	0	0	0	0	0	0	0	0	0				6.5712E4															2	1	0	0	0	2	0	0	0
Unknown
Protein Group	Protein ID	Accession	-10lgP	Coverage (%)	Coverage (%)																		Area																				#Spec
					Control-1	Control-2	Control-3	Control-4	Control-5	Control-6	Control-7	Control-8	Control-9	Control-10	Control-11	Control-12	Control-13	Control-14	Control-15	Control-16	Control-17	Control-18	Control-1	Control-2	Control-3	Control-4	Control-5	Control-6	Control-7	Control-8	Control-9	Control-10	Control-11	Control-12	Control-13	Control-14	Control-15	Control-16	Control-17	Control-18	#Peptides	#Unique	Control-1	Control-2	Control-3	Control-4	Control-5	Control-6	Control-7
276	374	Q9LV33|BGL44_ARATH	58.06	2	0	0	0	0	0	2	0	0	0	0	0	0	0	0	0	0	0	0						4.8758E3													1	1	0	0	0	0	0	1	0
247	126	Q38J50|FOMT2_WHEAT	105.24	7	0	0	0	7	0	0	0	0	0	0	0	0	0	0	0	0	0	0				5.317E4															2	2	0	0	0	2	0	0	0
295	5428	Q8GYA3|OPRL1_ARATH	66.69	3	0	0	0	0	0	0	0	0	0	0	0	0	0	0	0	0	3	0																	1.2499E4		1	1	0	0	0	0	0	0	0
190	649	Q8VYF5|NILP1_ARATH	128.9	8	0	0	0	8	0	0	0	0	0	0	0	0	0	0	0	4	0	0				9.2331E4												7.2447E2			2	2	0	0	0	2	0	0	0
183	691	Q42586|UMPS_ARATH	66.69	2	0	0	0	0	0	0	0	0	2	0	0	0	0	0	0	0	0	2									7.6384E3									2.8293E4	1	1	0	0	0	0	0	0	0
[truncated: 17 more columns]

## Sheet: Table S6-4
Table S6-4 Localization of proteins from Triticum aestivum, treatmented by GSNO
Apoplast
Protein Group	Protein ID	Accession	-10lgP	Coverage (%)	Coverage (%)																		Area																				#Spec
					Control-1	Control-2	Control-3	Control-4	Control-5	Control-6	Control-7	Control-8	Control-9	Control-10	Control-11	Control-12	Control-13	Control-14	Control-15	Control-16	Control-17	Control-18	Control-1	Control-2	Control-3	Control-4	Control-5	Control-6	Control-7	Control-8	Control-9	Control-10	Control-11	Control-12	Control-13	Control-14	Control-15	Control-16	Control-17	Control-18	#Peptides	#Unique	Control-1	Control-2	Control-3	Control-4	Control-5	Control-6	Control-7
121	217	P26759|GER3_WHEAT	158.22	23	0	11	8	0	0	0	0	16	0	0	4	11	0	0	0	0	0	8		2.6588E5	3.7383E5					2.9034E5			1.443E5	2.6932E4						2.4285E5	4	4	0	3	3	0	0	0	0
Cell wall
Protein Group	Protein ID	Accession	-10lgP	Coverage (%)	Coverage (%)																		Area																				#Spec
					Control-1	Control-2	Control-3	Control-4	Control-5	Control-6	Control-7	Control-8	Control-9	Control-10	Control-11	Control-12	Control-13	Control-14	Control-15	Control-16	Control-17	Control-18	Control-1	Control-2	Control-3	Control-4	Control-5	Control-6	Control-7	Control-8	Control-9	Control-10	Control-11	Control-12	Control-13	Control-14	Control-15	Control-16	Control-17	Control-18	#Peptides	#Unique	Control-1	Control-2	Control-3	Control-4	Control-5	Control-6	Control-7
121	217	P26759|GER3_WHEAT	158.22	23	0	11	8	0	0	0	0	16	0	0	4	11	0	0	0	0	0	8		2.6588E5	3.7383E5					2.9034E5			1.443E5	2.6932E4						2.4285E5	4	4	0	3	3	0	0	0	0
Chloroplast
Protein Group	Protein ID	Accession	-10lgP	Coverage (%)	Coverage (%)																		Area																				#Spec
					Control-1	Control-2	Control-3	Control-4	Control-5	Control-6	Control-7	Control-8	Control-9	Control-10	Control-11	Control-12	Control-13	Control-14	Control-15	Control-16	Control-17	Control-18	Control-1	Control-2	Control-3	Control-4	Control-5	Control-6	Control-7	Control-8	Control-9	Control-10	Control-11	Control-12	Control-13	Control-14	Control-15	Control-16	Control-17	Control-18	#Peptides	#Unique	Control-1	Control-2	Control-3	Control-4	Control-5	Control-6	Control-7
327	1145	O50039|OTC_ARATH	50.24	2	0	0	0	0	0	0	0	0	0	0	0	0	0	0	0	0	0	0																			1	1	0	0	0	0	0	0	0
145	101	Q10MQ2|DAPAT_ORYSJ	174.37	17	0	0	0	0	0	0	11	0	0	0	0	0	0	0	0	0	0	0							4.3841E4												6	6	0	0	0	0	0	0	6
222	338	Q8RWV0|TKTC1_ARATH	87.42	3	0	0	0	0	0	0	0	0	1	0	0	0	0	0	0	0	0	0									8.6875E3										2	2	0	0	0	0	0	0	0
232	527	Q9SAJ6|G3PP1_ARATH	52.94	2	0	0	0	0	0	2	0	0	0	0	0	0	0	0	0	0	0	0						4.7117E4													1	1	0	0	0	0	0	1	0
232	503	Q5E924|G3PP2_ARATH	52.94	2	0	0	0	0	0	2	0	0	0	0	0	0	0	0	0	0	0	0						4.7117E4													1	1	0	0	0	0	0	1	0
120	154	P93819|MDHC1_ARATH	177.33	14	2	0	0	0	0	0	0	0	0	8	0	0	0	0	0	5	0	0	0									7.469E4						5.866E3			4	4	1	0	0	0	0	0	0
200	252	Q9SN86|MDHP_ARATH	153.77	7	0	0	0	0	0	0	0	0	0	7	0	0	0	0	0	0	0	0										1.4011E4									3	1	0	0	0	0	0	0	0
222	599	F4IW47|TKTC2_ARATH	87.42	3	0	0	0	0	0	0	0	0	1	0	0	0	0	0	0	0	0	0									8.6875E3										2	2	0	0	0	0	0	0	0
351	4891	Q96266|GSTF8_ARATH	51.01	3	0	3	0	0	0	0	0	0	0	0	0	0	0	0	0	0	0	0		7.3074E4																	1	1	0	1	0	0	0	0	0
169	563	Q8W593|LGUC_ARATH	97.57	4	0	0	0	0	0	0	0	0	0	4	0	0	0	0	0	4	0	0										3.7481E4						8.4472E3			1	1	0	0	0	0	0	0	0
172	533	Q9SLA8|FABI_ARATH	82.99	3	0	0	0	0	0	0	0	0	0	0	0	0	0	0	0	3	0	0																7.0567E3			1	1	0	0	0	0	0	0	0
193	143	Q9LTX9|HSP7G_ARATH	123.8	6	0	0	0	0	0	0	0	0	2	0	0	0	0	0	0	0	2	0									5.1985E3								7.9258E3		3	3	0	0	0	0	0	0	0
294	5433	Q9FFP9|SRK2H_ARATH	54.22	4	4	0	0	0	0	0	0	0	0	0	0	0	0	0	0	0	0	0	8.0245E3																		1	1	1	0	0	0	0	0	0
292	2550	Q9LF04|STAD1_ARATH	59.32	3	0	0	0	0	0	0	0	0	0	0	3	0	0	0	0	0	0	0											3.0965E3								1	1	0	0	0	0	0	0	0
292	2737	Q9LF05|STAD3_ARATH	59.32	3	0	0	0	0	0	0	0	0	0	0	3	0	0	0	0	0	0	0											3.0965E3								1	1	0	0	0	0	0	0	0
292	3140	Q9M879|STAD5_ARATH	59.32	3	0	0	0	0	0	0	0	0	0	0	3	0	0	0	0	0	0	0											3.0965E3								1	1	0	0	0	0	0	0	0
292	1180	O22832|STAD7_ARATH	59.32	3	0	0	0	0	0	0	0	0	0	0	3	0	0	0	0	0	0	0											3.0965E3								1	1	0	0	0	0	0	0	0
131	127	P80602|BAS1_WHEAT	206.62	29	0	0	0	0	0	0	0	0	0	0	0	0	0	0	0	0	0	24																		1.3451E5	5	5	0	0	0	0	0	0	0
165	90	Q1XIR9|HGL1A_WHEAT	156.88	13	2	0	0	0	2	0	0	0	0	0	2	0	0	0	0	0	0	0	2.1224E4				1.8878E4						2.2122E4								7	5	1	0	0	0	1	0	0
253	445	Q42593|APXT_ARATH	91.74	2	2	0	0	0	2	0	0	0	0	0	0	0	0	0	0	0	0	0	3.5227E4				4.5924E4														1	1	1	0	0	0	1	0	0
253	646	Q42592|APXS_ARATH	91.74	2	2	0	0	0	2	0	0	0	0	0	0	0	0	0	0	0	0	0	3.5227E4				4.5924E4														1	1	1	0	0	0	1	0	0
260	208	O23404|PPDK1_ARATH	101.71	2	0	0	0	2	0	0	0	0	0	0	0	0	0	0	0	0	0	0				9.5547E3															2	2	0	0	0	2	0	0	0
132	476	Q00917|SUS2_ARATH	118.79	2	0	0	0	0	0	0	0	0	2	0	0	0	0	0	0	0	1	0									4.8698E3										2	1	0	0	0	0	0	0	0
153	306	Q43199|APT1_WHEAT	164.59	29	0	0	0	0	0	0	0	0	0	0	0	0	0	0	0	0	0	21																		1.3961E5	4	4	0	0	0	0	0	0	0
140	200	Q42669|ACOHC_CUCMC	165.66	6	0	0	0	2	0	0	0	0	0	0	0	0	0	0	2	0	0	0				1.2822E4															3	1	0	0	0	4	0	0	0
76	39	P38076|CYSK_WHEAT	281.82	50	0	0	0	0	0	0	0	0	0	19	0	0	0	0	0	4	0	0										9.7666E4									12	11	0	0	0	0	0	0	0
365	2728	Q9SAR5|AKR2A_ARATH	52.84	4	0	0	0	0	4	0	0	0	0	0	0	0	0	0	0	0	0	0					4.171E3														1	1	0	0	0	0	1	0	0
365	5437	Q29Q26|AKR2B_ARATH	52.84	3	0	0	0	0	3	0	0	0	0	0	0	0	0	0	0	0	0	0					4.171E3														1	1	0	0	0	0	1	0	0
160	85	Q03387|IF4G1_WHEAT	179.4	7	0	1	0	0	1	0	0	0	0	0	0	0	0	0	0	0	0	5		2.4705E4			3.564E4													1.5298E5	6	6	0	1	0	0	1	0	0
220	385	O24473|IF2B_WHEAT	89.53	7	0	4	0	0	0	0	0	0	0	0	4	0	0	0	0	0	0	4		1.42E4									9.7887E3							1.5292E4	2	2	0	1	0	0	0	0	0
Cytoplasm
Protein Group	Protein ID	Accession	-10lgP	Coverage (%)	Coverage (%)																		Area																				#Spec
					Control-1	Control-2	Control-3	Control-4	Control-5	Control-6	Control-7	Control-8	Control-9	Control-10	Control-11	Control-12	Control-13	Control-14	Control-15	Control-16	Control-17	Control-18	Control-1	Control-2	Control-3	Control-4	Control-5	Control-6	Control-7	Control-8	Control-9	Control-10	Control-11	Control-12	Control-13	Control-14	Control-15	Control-16	Control-17	Control-18	#Peptides	#Unique	Control-1	Control-2	Control-3	Control-4	Control-5	Control-6	Control-7
17	81	O50008|METE1_ARATH	285.94	15	0	0	0	0	0	0	1	1	8	1	1	0	0	0	3	0	13	0							9.3492E3	0	2.8354E5	1.3223E4	0				4.0249E3		9.4344E5		10	10	0	0	0	0	0	0	3
275	812	Q9LTB2|MMT1_ARATH	60.41	1	0	0	0	1	0	0	0	0	0	0	0	0	0	0	0	0	0	0				5.4892E3															1	1	0	0	0	1	0	0	0
124	228	P35510|PAL1_ARATH	155.36	6	0	0	0	0	0	0	0	0	6	0	0	0	0	0	0	0	0	0									5.2825E3										3	1	0	0	0	0	0	0	0
106	142	Q9SS45|PAL4_ARATH	196.3	7	0	0	0	0	0	0	0	0	5	0	0	0	0	0	0	0	0	0									4.7379E4										6	4	0	0	0	0	0	0	0
124	168	Q43210|PALY_WHEAT	155.36	6	0	0	0	0	0	0	0	0	6	0	0	0	0	0	0	0	0	0									5.2825E3										3	1	0	0	0	0	0	0	0
98	257	Q9SJL8|METK3_ARATH	184.62	9	4	0	0	0	2	0	4	7	0	0	0	0	0	0	0	0	0	0								1.7746E4											3	1	1	0	0	0	1	0	3
135	46	Q9LKJ3|PHSH_WHEAT	246.04	17	0	0	0	0	0	0	0	0	0	0	0	0	0	0	0	0	8	0																	5.9053E4		11	11	0	0	0	0	0	0	0
115	201	Q9LF98|ALFC8_ARATH	201.06	11	0	0	0	0	4	0	0	0	0	4	0	0	0	0	0	0	0	0					3.7715E4					6.3102E4									5	5	0	0	0	0	1	0	0
59	29	Q9MAH0|CAPP1_ARATH	265.54	17	0	0	0	13	0	0	0	0	0	0	0	0	0	0	5	0	0	0				1.4552E5											4.3995E4				13	3	0	0	0	16	0	0	0
71	33	Q5GM68|CAPP2_ARATH	266.39	17	0	0	0	13	0	0	0	0	0	0	0	0	0	0	1	0	0	0				2.8229E4															13	3	0	0	0	14	0	0	0
96	115	Q1W374|PMM_WHEAT	224.73	23	0	16	11	0	4	0	0	23	0	0	16	0	0	0	0	0	0	0		3.5365E5	1.6578E5		2.0661E4			3.0852E5			2.2849E5								5	5	0	11	7	0	1	0	0
108	534	Q9M1B9|SCRK4_ARATH	128.24	7	0	0	0	0	0	0	0	0	0	7	0	0	0	0	0	7	0	0										7.7515E4						2.4478E4			2	1	0	0	0	0	0	0	0
101	310	O82616|SCRK5_ARATH	152.74	10	0	0	0	0	3	3	0	0	0	6	0	0	0	0	0	10	0	0					2.2984E4	2.4947E4				1.2532E5						3.1956E4			3	3	0	0	0	0	1	1	0
342	1299	O49299|PGMC1_ARATH	57.65	2	2	0	0	0	0	0	0	0	0	0	0	0	0	0	0	0	0	0	6.4759E4																		1	1	1	0	0	0	0	0	0
342	1012	Q9SGC1|PGMC2_ARATH	57.65	2	2	0	0	0	0	0	0	0	0	0	0	0	0	0	0	0	0	0	6.4759E4																		1	1	1	0	0	0	0	0	0
65	95	P57751|UGPA1_ARATH	212.52	13	0	0	0	0	0	0	0	0	0	0	0	0	3	0	0	0	0	0													1.9943E3						5	5	0	0	0	0	0	0	0
65	103	Q9M9P3|UGPA2_ARATH	212.52	13	0	0	0	0	0	0	0	0	0	0	0	0	3	0	0	0	0	0													1.9943E3						5	5	0	0	0	0	0	0	0
46	149	Q8LRM8|TCTP_WHEAT	258.67	44	0	0	8	0	0	0	0	0	0	0	0	0	0	0	0	0	0	44			7.3895E3															1.7544E6	8	8	0	0	1	0	0	0	0
41	24	Q9ZRB7|TBA_WHEAT	288.73	48	6	0	4	8	0	0	4	4	0	0	0	0	0	0	8	0	0	4	1.2583E6																		16	4	2	0	1	2	0	0	1
30	16	Q9ZRB2|TBB1_WHEAT	282.92	41	0	2	0	3	3	0	2	0	0	0	0	0	2	0	3	0	0	0							4.0314E3												17	1	0	1	0	1	1	0	1
30	13	Q9ZRA8|TBB5_WHEAT	282.92	40	0	2	0	3	3	0	2	0	0	0	0	0	2	0	3	0	0	0							4.0314E3												17	1	0	1	0	1	1	0	1
351	2524	Q9SLM6|GSTF3_ARATH	51.01	4	0	4	0	0	0	0	0	0	0	0	0	0	0	0	0	0	0	0		7.3074E4																	1	1	0	1	0	0	0	0	0
269	1591	F4K1Z0|ECT3_ARATH	53.07	2	0	0	0	0	0	0	0	0	0	0	2	0	0	0	0	0	0	0											2.0318E3								1	1	0	0	0	0	0	0	0
355	5461	Q9FK35|KAD3_ARATH	50.35	3	0	0	0	0	3	0	0	0	0	0	0	0	0	0	0	0	0	0					8.2769E4														1	1	0	0	0	0	1	0	0
355	5374	O82514|KAD4_ARATH	50.35	3	0	0	0	0	3	0	0	0	0	0	0	0	0	0	0	0	0	0					8.2769E4														1	1	0	0	0	0	1	0	0
212	411	Q9FIE8|UXS3_ARATH	123.55	8	0	0	0	0	2	0	0	0	0	0	0	0	0	0	0	0	0	0					1.2083E4														3	2	0	0	0	0	1	0	0
212	418	Q9SN95|UXS5_ARATH	123.55	9	0	0	0	0	2	0	0	0	0	0	0	0	0	0	0	0	0	0					1.2083E4														3	2	0	0	0	0	1	0	0
212	440	Q9ZV36|UXS6_ARATH	123.55	8	0	0	0	0	2	0	0	0	0	0	0	0	0	0	0	0	0	0					1.2083E4														3	2	0	0	0	0	1	0	0
283	439	P42733|RS113_ARATH	52.18	4	0	0	0	0	0	0	0	0	0	0	0	0	0	0	0	0	0	4																		1.1389E5	1	1	0	0	0	0	0	0	0
164	616	Q8L8Y0|RS21_ARATH	130.56	6	6	0	0	0	6	6	0	0	0	0	0	0	0	0	0	0	0	0	7.4684E4				1.4396E5	1.7197E5													2	2	4	0	0	0	4	4	0
164	784	Q93VB8|RS22_ARATH	130.56	6	6	0	0	0	6	6	0	0	0	0	0	0	0	0	0	0	0	0	7.4684E4				1.4396E5	1.7197E5													2	2	4	0	0	0	4	4	0
164	556	P49688|RS23_ARATH	130.56	6	6	0	0	0	6	6	0	0	0	0	0	0	0	0	0	0	0	0	7.4684E4				1.4396E5	1.7197E5													2	2	4	0	0	0	4	4	0
164	957	Q9SCM3|RS24_ARATH	130.56	6	6	0	0	0	6	6	0	0	0	0	0	0	0	0	0	0	0	0	7.4684E4				1.4396E5	1.7197E5													2	2	4	0	0	0	4	4	0
15	92	Q9FJA6|RS33_ARATH	273.44	30	12	21	29	0	19	5	0	23	0	0	23	5	0	0	0	0	0	5	2.265E5	3.0379E6	3.1545E6		6.2306E5	1.235E5		2.9922E6			2.8078E6	4.4634E3						8.0813E4	9	9	5	28	34	0	9	2	0
37	171	Q93VH9|RS41_ARATH	240.15	22	22	0	13	0	19	13	0	4	0	0	4	0	0	13	0	0	0	4	2.9536E6		5.2339E4		3.9558E6	2.7492E6		4.1312E4			3.4201E4			5.4582E3				2.8318E4	5	5	29	0	4	0	25	24	0
37	169	P49204|RS42_ARATH	240.15	22	22	0	13	0	19	13	0	4	0	0	4	0	0	13	0	0	0	4	2.9536E6		5.2339E4		3.9558E6	2.7492E6		4.1312E4			3.4201E4			5.4582E3				2.8318E4	5	5	29	0	4	0	25	24	0
37	140	Q8VYK6|RS43_ARATH	240.15	22	22	0	13	0	19	13	0	4	0	0	4	0	0	13	0	0	0	4	2.9536E6		5.2339E4		3.9558E6	2.7492E6		4.1312E4			3.4201E4			5.4582E3				2.8318E4	5	5	29	0	4	0	25	24	0
233	390	Q9ZUT9|RS51_ARATH	81.19	5	0	0	0	0	0	0	0	0	0	0	0	0	0	0	0	0	0	5																		8.0057E4	1	1	0	0	0	0	0	0	0
233	391	P51427|RS52_ARATH	81.19	5	0	0	0	0	0	0	0	0	0	0	0	0	0	0	0	0	0	5																		8.0057E4	1	1	0	0	0	0	0	0	0
28	291	O48549|RS61_ARATH	221.72	13	13	13	13	0	13	10	0	13	0	0	13	4	0	0	0	0	0	0	1.2708E6	1.2556E6	6.0727E5		2.4572E6	1.4071E6		1.7129E6			6.5913E5	1.5719E4							4	4	17	15	10	0	16	12	0
176	430	Q93VG5|RS81_ARATH	107.09	10	4	0	0	0	10	4	0	0	0	0	0	0	0	0	0	0	0	0					5.1013E4														2	1	2	0	0	0	4	3	0
113	314	Q9FIF3|RS82_ARATH	161.15	17	11	0	0	0	11	11	0	0	0	0	0	0	0	0	0	0	0	0	2.0969E5				5.9982E5	4.8145E5													3	2	4	0	0	0	9	9	0
104	139	Q9FLF0|RS92_ARATH	160.89	27	0	4	0	0	0	0	0	0	0	0	0	0	0	0	0	0	0	19		1.7332E4																9.7978E5	5	5	0	1	0	0	0	0	0
39	205	Q08682|RSSA1_ARATH	215.99	20	10	10	13	0	16	18	0	13	0	6	13	3	0	0	0	0	0	13	7.4753E4	4.049E5	7.015E5		9.8074E4	1.5931E5		5.884E5		2.5508E3	1.2476E5	4.2615E3						5.1223E5	4	4	7	10	11	0	5	4	0
214	1050	Q42112|RLA02_ARATH	90.97	5	0	0	0	0	0	0	0	0	0	0	0	0	0	0	0	2	0	0																1.3112E3			2	2	0	0	0	0	0	0	0
35	146	Q93VT9|RL101_ARATH	203.51	21	5	18	18	0	9	5	0	17	5	0	5	0	0	0	0	0	0	21	0	1.7197E5	2.0716E5		2.4747E4	0		1.0095E5	0		3.8891E4							1.5784E6	5	5	1	7	8	0	2	1	0
35	176	Q08770|RL102_ARATH	203.51	21	5	18	18	0	9	5	0	17	5	0	5	0	0	0	0	0	0	21	0	1.7197E5	2.0716E5		2.4747E4	0		1.0095E5	0		3.8891E4							1.5784E6	5	5	1	7	8	0	2	1	0
35	190	Q93W22|RL103_ARATH	203.51	21	5	18	18	0	9	5	0	17	5	0	5	0	0	0	0	0	0	21	0	1.7197E5	2.0716E5		2.4747E4	0		1.0095E5	0		3.8891E4							1.5784E6	5	5	1	7	8	0	2	1	0
72	177	P59230|R10A2_ARATH	216	19	0	19	15	0	4	0	0	15	0	0	15	0	0	0	0	0	0	0		3.5595E5	2.0538E5					3.6933E5			3.7191E5								5	2	0	17	13	0	2	0	0
75	145	P59231|R10A3_ARATH	222.04	18	0	18	12	0	4	0	0	15	0	0	12	0	0	0	0	0	0	0		9.7396E3						3.8319E4											5	1	0	14	9	0	2	0	0
211	335	P42795|RL111_ARATH	121.72	10	0	0	0	0	0	0	0	0	0	0	0	0	0	0	0	0	0	10																		4.2835E5	2	2	0	0	0	0	0	0	0
211	341	P42794|RL112_ARATH	121.72	10	0	0	0	0	0	0	0	0	0	0	0	0	0	0	0	0	0	10																		4.2835E5	2	2	0	0	0	0	0	0	0
207	729	P50883|RL121_ARATH	96.97	9	0	0	0	0	0	0	0	0	0	0	0	0	0	0	0	0	0	9																		1.6239E5	1	1	0	0	0	0	0	0	0
207	730	Q9LFH5|RL122_ARATH	96.97	9	0	0	0	0	0	0	0	0	0	0	0	0	0	0	0	0	0	9																		1.6239E5	1	1	0	0	0	0	0	0	0
207	727	Q9FF52|RL123_ARATH	96.97	9	0	0	0	0	0	0	0	0	0	0	0	0	0	0	0	0	0	9																		1.6239E5	1	1	0	0	0	0	0	0	0
92	264	P41127|RL131_ARATH	195.9	17	17	0	0	0	17	8	0	0	0	0	0	0	0	0	0	0	0	0	1.5784E4				2.8364E4														6	1	10	0	0	0	10	7	0
73	182	Q9FF90|RL133_ARATH	238.37	19	18	0	0	0	18	15	0	0	0	0	0	0	0	0	0	0	0	0	3.1173E5				6.726E5	5.9636E5													8	3	14	0	0	0	14	16	0
139	1877	Q9LRX8|R13A2_ARATH	67.51	4	0	0	0	0	0	0	0	0	0	0	0	0	0	0	0	0	0	4																		8.3598E5	1	1	0	0	0	0	0	0	0
139	5446	Q9SVR0|R13A3_ARATH	67.51	4	0	0	0	0	0	0	0	0	0	0	0	0	0	0	0	0	0	4																		8.3598E5	1	1	0	0	0	0	0	0	0
139	4291	Q9FKC0|R13A4_ARATH	67.51	4	0	0	0	0	0	0	0	0	0	0	0	0	0	0	0	0	0	4																		8.3598E5	1	1	0	0	0	0	0	0	0
204	4073	Q93VI3|RL171_ARATH	93.72	5	0	0	0	0	0	0	0	0	0	0	0	0	0	0	0	0	0	5																		3.554E5	1	1	0	0	0	0	0	0	0
204	2141	P51413|RL172_ARATH	93.72	5	0	0	0	0	0	0	0	0	0	0	0	0	0	0	0	0	0	5																		3.554E5	1	1	0	0	0	0	0	0	0
261	444	P42791|RL182_ARATH	67.72	6	0	0	0	0	0	0	0	0	0	0	0	0	0	0	0	0	0	6																		2.3398E4	1	1	0	0	0	0	0	0	0
261	433	Q940B0|RL183_ARATH	67.72	6	0	0	0	0	0	0	0	0	0	0	0	0	0	0	0	0	0	6																		2.3398E4	1	1	0	0	0	0	0	0	0
177	262	Q9LUD4|R18A3_ARATH	148.03	24	0	0	0	0	0	0	0	0	0	0	0	0	0	0	0	0	0	24																		5.146E4	4	2	0	0	0	0	0	0	0
47	292	Q9SRX2|RL191_ARATH	188.09	9	0	9	8	0	4	0	0	9	0	0	8	0	0	0	0	0	0	9		1.2636E6	5.3651E5		6.8318E4			6.2335E5			5.6526E5							1.6541E6	5	5	0	11	8	0	1	0	0
47	231	P49693|RL193_ARATH	188.09	10	0	10	9	0	4	0	0	10	0	0	9	0	0	0	0	0	0	10		1.2636E6	5.3651E5		6.8318E4			6.2335E5			5.6526E5							1.6541E6	5	5	0	11	8	0	1	0	0
341	2614	Q8LD46|R23A1_ARATH	70.19	8	0	0	0	0	0	0	0	0	0	0	0	0	0	0	0	0	0	8																		7.683E4	1	1	0	0	0	0	0	0	0
341	1616	Q9M3C3|R23A2_ARATH	70.19	8	0	0	0	0	0	0	0	0	0	0	0	0	0	0	0	0	0	8																		7.683E4	1	1	0	0	0	0	0	0	0
236	909	Q9FJX2|RL262_ARATH	118.71	14	0	0	0	0	0	0	0	0	0	0	0	0	0	0	0	0	0	14																		2.7559E5	3	3	0	0	0	0	0	0	0
271	1893	Q9LR33|R27A2_ARATH	61.27	5	0	0	0	0	0	0	0	0	0	0	0	0	0	0	0	0	0	5																		4.1075E4	1	1	0	0	0	0	0	0	0
271	1892	P49637|R27A3_ARATH	61.27	5	0	0	0	0	0	0	0	0	0	0	0	0	0	0	0	0	0	5																		4.1075E4	1	1	0	0	0	0	0	0	0
32	84	P17094|RL31_ARATH	276.22	17	0	3	0	0	3	2	2	2	0	0	2	0	0	0	0	0	0	2							8.049E3												9	1	0	1	0	0	2	1	1
356	3225	Q42351|RL341_ARATH	54.2	7	0	0	0	0	0	0	0	0	0	0	0	0	0	0	0	0	0	7																		7.3426E4	1	1	0	0	0	0	0	0	0
356	1739	Q9FE65|RL342_ARATH	54.2	7	0	0	0	0	0	0	0	0	0	0	0	0	0	0	0	0	0	7																		7.3426E4	1	1	0	0	0	0	0	0	0
356	4576	Q9LJW6|RL343_ARATH	54.2	7	0	0	0	0	0	0	0	0	0	0	0	0	0	0	0	0	0	7																		7.3426E4	1	1	0	0	0	0	0	0	0
118	311	Q8LBI1|RL51_ARATH	180.08	11	0	0	0	0	0	0	0	0	0	3	0	0	0	0	0	0	0	0										2.5197E5									4	4	0	0	0	0	0	0	0
118	305	P49227|RL52_ARATH	180.08	11	0	0	0	0	0	0	0	0	0	3	0	0	0	0	0	0	0	0										2.5197E5									4	4	0	0	0	0	0	0	0
82	394	P60040|RL72_ARATH	183.94	13	0	9	9	0	0	0	0	12	0	0	9	4	0	0	0	0	0	9								1.8921E5											4	1	0	9	12	0	0	0	0
64	276	Q9LHP1|RL74_ARATH	184.67	12	0	12	12	0	0	0	0	11	0	0	12	4	0	0	0	0	0	11		1.4263E6	1.0594E6					2.487E5			2.8693E5							0	4	1	0	14	17	0	0	0	0
48	269	P49692|RL7A1_ARATH	183.77	12	12	0	0	0	12	9	0	0	0	0	0	0	0	0	0	0	0	0	1.8117E6				2.4082E6	1.7731E6													5	5	20	0	0	0	17	21	0
48	222	Q9LZH9|RL7A2_ARATH	183.77	12	12	0	0	0	12	9	0	0	0	0	0	0	0	0	0	0	0	0	1.8117E6				2.4082E6	1.7731E6													5	5	20	0	0	0	17	21	0
68	186	P46286|RL81_ARATH	196.77	16	11	4	0	0	16	7	0	0	0	0	0	0	0	0	0	0	0	4	1.8151E6	1.745E4			2.1449E6	5.7779E5												4.0567E4	5	5	14	1	0	0	16	9	0
3	63	P0DH99|EF1A1_ARATH	325.5	29	14	7	7	0	14	7	6	12	0	4	9	0	0	0	0	2	0	12	1.2588E4	7.9132E3	0		1.4655E4			1.1704E4										0	13	2	11	4	3	0	9	6	6
3	61	Q8W4H7|EF1A2_ARATH	325.5	29	14	7	7	0	14	7	6	12	0	4	9	0	0	0	0	2	0	12	1.2588E4	7.9132E3	0		1.4655E4			1.1704E4										0	13	2	11	4	3	0	9	6	6
3	62	Q0WL56|EF1A3_ARATH	325.5	29	14	7	7	0	14	7	6	12	0	4	9	0	0	0	0	2	0	12	1.2588E4	7.9132E3	0		1.4655E4			1.1704E4										0	13	2	11	4	3	0	9	6	6
3	64	Q8GTY0|EF1A4_ARATH	325.5	29	14	7	7	0	14	7	6	12	0	4	9	0	0	0	0	2	0	12	1.2588E4	7.9132E3	0		1.4655E4			1.1704E4										0	13	2	11	4	3	0	9	6	6
1	9	Q03033|EF1A_WHEAT	380.8	44	11	7	4	3	13	7	6	12	0	4	12	0	0	0	0	2	0	12		1.808E4		1.5204E3	1.2245E5			4.1825E4			1.4872E4							2.5011E4	17	6	10	4	2	1	9	6	6
44	138	P29546|EF1B_WHEAT	261.34	36	36	0	0	0	36	31	0	6	0	0	0	0	0	0	0	0	0	0	2.6413E6				3.7636E6	2.0028E6		1.0859E4											8	8	30	0	0	0	23	21	0
51	58	Q9ASR1|EF2_ARATH	239.59	13	0	0	0	6	0	0	0	0	0	0	0	0	0	0	1	0	0	0				1.5301E5											1.0692E4				10	10	0	0	0	13	0	0	0
4	4	P41378|IF4A_WHEAT	410.02	52	7	0	4	0	9	7	7	0	2	3	0	0	0	0	0	0	0	6	5.0767E4		5.5284E3		5.6467E4	5.5154E4	4.5891E4		0	4.4507E3								2.8886E4	23	21	2	0	1	0	3	2	5
228	495	Q38884|EIF3I_ARATH	72.78	3	3	0	0	0	3	0	0	0	0	0	0	0	0	0	0	0	0	0	1.4381E5				1.0788E5														1	1	1	0	0	0	1	0	0
192	1532	Q9SZA3|EIF3K_ARATH	73.47	4	0	4	4	0	0	0	0	4	0	0	4	0	0	0	0	0	0	0		1.8359E5	8.5306E4					1.0249E5			1.4078E5								1	1	0	3	1	0	0	0	0
352	2675	Q9SZY1|NACA4_ARATH	50.58	7	7	0	0	0	0	0	0	0	0	0	0	0	0	0	0	0	0	0	1.2714E4																		1	1	1	0	0	0	0	0	0
187	452	Q9LTR9|NMT1_ARATH	101.51	5	0	3	0	0	0	0	0	0	0	0	0	0	0	0	0	0	0	0		9.3014E3																	2	2	0	1	0	0	0	0	0
53	98	Q9S9N1|HSP7E_ARATH	233.7	14	10	5	7	0	7	5	2	5	7	0	0	0	0	0	3	0	0	5	3.6281E4								2.8846E3										8	2	9	3	4	0	5	2	1
111	76	Q940P8|TCPB_ARATH	219.73	19	4	4	4	0	8	2	0	4	0	0	4	7	0	0	0	0	0	0	8.1485E4	1.4825E5	1.2386E5		2.4074E5	4.8891E4		1.5817E5			6.2413E4	1.4858E5							7	7	4	4	4	0	5	1	0
114	106	O04450|TCPE_ARATH	185.26	11	10	0	0	0	9	6	0	0	0	0	0	0	0	0	0	0	0	0	1.5086E5				2.7935E5	2.2098E5													6	6	7	0	0	0	8	6	0
351	1582	P46422|GSTF2_ARATH	51.01	4	0	4	0	0	0	0	0	0	0	0	0	0	0	0	0	0	0	0		7.3074E4																	1	1	0	1	0	0	0	0	0
90	612	Q05431|APX1_ARATH	89.3	4	4	4	4	0	4	0	0	4	0	0	4	0	0	0	0	0	0	4	9.8187E4	1.7956E6	9.667E5		4.8582E5			1.3415E6			4.7814E5							1.5009E5	1	1	2	11	7	0	3	0	0
91	422	Q1PER6|APX2_ARATH	88.19	4	4	4	4	0	4	0	0	4	0	0	4	4	0	0	0	0	0	4	0	4.547E5	3.3937E5		2.3187E5			5.022E5			5.2294E5	8.9083E3						7.3576E4	1	1	1	9	5	0	4	0	0
121	217	P26759|GER3_WHEAT	158.22	23	0	11	8	0	0	0	0	16	0	0	4	11	0	0	0	0	0	8		2.6588E5	3.7383E5					2.9034E5			1.443E5	2.6932E4						2.4285E5	4	4	0	3	3	0	0	0	0
260	208	O23404|PPDK1_ARATH	101.71	2	0	0	0	2	0	0	0	0	0	0	0	0	0	0	0	0	0	0				9.5547E3															2	2	0	0	0	2	0	0	0
132	476	Q00917|SUS2_ARATH	118.79	2	0	0	0	0	0	0	0	0	2	0	0	0	0	0	0	0	1	0									4.8698E3										2	1	0	0	0	0	0	0	0
153	306	Q43199|APT1_WHEAT	164.59	29	0	0	0	0	0	0	0	0	0	0	0	0	0	0	0	0	0	21																		1.3961E5	4	4	0	0	0	0	0	0	0
140	200	Q42669|ACOHC_CUCMC	165.66	6	0	0	0	2	0	0	0	0	0	0	0	0	0	0	2	0	0	0				1.2822E4															3	1	0	0	0	4	0	0	0
76	39	P38076|CYSK_WHEAT	281.82	50	0	0	0	0	0	0	0	0	0	19	0	0	0	0	0	4	0	0										9.7666E4									12	11	0	0	0	0	0	0	0
26	26	P53496|ACT11_ARATH	296.5	37	15	11	10	5	15	8	8	11	0	8	10	0	0	0	0	8	0	8	5.3051E4	3.4698E4	2.696E4		5.827E4			2.8883E4			2.2563E4								12	1	11	5	6	1	9	5	3
12	32	P53497|ACT12_ARATH	303.54	37	15	11	10	7	15	10	8	11	0	8	10	0	0	0	0	10	0	10	1.7137E5	1.0346E5	8.4872E4	3.3492E3	1.8571E5	8.4025E4		1.04E5			8.1434E4					4.2967E3		5.6612E4	12	1	13	6	7	3	10	6	3
12	31	P53494|ACT4_ARATH	303.54	37	15	11	10	7	15	10	8	11	0	8	10	0	0	0	0	10	0	10	1.7137E5	1.0346E5	8.4872E4	3.3492E3	1.8571E5	8.4025E4		1.04E5			8.1434E4					4.2967E3		5.6612E4	12	1	13	6	7	3	10	6	3
108	312	Q9LNE4|SCRK3_ARATH	128.24	6	0	0	0	0	0	0	0	0	0	6	0	0	0	0	0	6	0	0										7.7515E4						2.4478E4			2	1	0	0	0	0	0	0	0
108	364	Q9LNE3|SCRK2_ARATH	128.24	7	0	0	0	0	0	0	0	0	0	7	0	0	0	0	0	7	0	0										7.7515E4						2.4478E4			2	1	0	0	0	0	0	0	0
122	249	O80501|RAH1B_ARATH	114.34	11	0	0	0	0	0	0	0	0	0	0	0	0	0	0	0	0	0	11																		4.063E4	2	1	0	0	0	0	0	0	0
122	289	Q9SMR4|RAH1C_ARATH	114.34	10	0	0	0	0	0	0	0	0	0	0	0	0	0	0	0	0	0	10																		4.063E4	2	1	0	0	0	0	0	0	0
287	403	Q9SSQ9|PLDA2_ARATH	63.98	2	0	0	0	0	0	0	0	0	2	0	0	0	0	0	0	0	0	0									3.8355E3										1	1	0	0	0	0	0	0	0
126	73	Q42560|ACO1_ARATH	197	10	0	0	0	3	0	0	0	0	0	0	0	0	0	0	2	0	0	0				3.7863E4															8	4	0	0	0	4	0	0	0
100	68	Q9SIB9|ACO3M_ARATH	228.68	10	0	0	0	2	0	0	0	0	0	0	0	0	0	0	3	0	0	0				8.6108E4											4.0684E4				7	2	0	0	0	3	0	0	0
62	294	P48491|TPIS_ARATH	129.02	7	0	7	7	0	0	0	0	4	0	0	4	4	0	0	0	0	0	7		7.9706E5	6.8146E5					2.0218E5			1.675E5	5.4516E3						1.1405E6	2	2	0	6	7	0	0	0	0
266	529	Q39243|TRXB1_ARATH	68.98	4	0	0	0	0	0	0	0	0	0	4	0	0	0	0	0	0	0	0										1.6867E4									1	1	0	0	0	0	0	0	0
266	613	Q39242|TRXB2_ARATH	68.98	4	0	0	0	0	0	0	0	0	0	4	0	0	0	0	0	0	0	0										1.6867E4									1	1	0	0	0	0	0	0	0
130	571	O48661|SPDS2_ARATH	121.02	8	0	0	0	0	0	0	0	0	0	8	0	0	0	0	0	4	0	0										7.3913E4						6.0562E4			2	2	0	0	0	0	0	0	0
22	148	P46077|14334_ARATH	228.62	20	20	7	10	0	20	16	0	13	0	0	7	0	0	3	0	0	0	0	1.0075E6		9.9225E4		1.1754E6	1.3559E6		1.0467E5			1.1645E5								8	1	32	5	4	0	30	20	0
43	211	P42644|14333_ARATH	211.9	20	20	3	6	0	20	14	0	9	0	0	0	0	0	3	0	0	0	0	4.2978E5		3.0486E4		4.406E5			3.2256E4											7	1	22	2	2	0	20	17	0
54	162	P25858|G3PC1_ARATH	195.26	20	9	4	14	0	9	9	0	13	0	9	4	0	0	0	9	0	0	4	1.7568E5	6.6077E4	1.7045E5		1.9058E5	1.7209E5		2.1645E5		6.1837E4	1.0466E5				1.0276E4			1.1835E5	5	5	3	1	4	0	3	5	0
54	141	Q9FX54|G3PC2_ARATH	195.26	20	9	4	14	0	9	9	0	13	0	9	4	0	0	0	9	0	0	4	1.7568E5	6.6077E4	1.7045E5		1.9058E5	1.7209E5		2.1645E5		6.1837E4	1.0466E5				1.0276E4			1.1835E5	5	5	3	1	4	0	3	5	0
154	220	P48347|14310_ARATH	139.02	10	10	0	0	0	7	4	0	3	0	0	0	0	0	0	0	0	0	0	6.6978E4							1.2123E4											3	1	4	0	0	0	3	2	0
16	137	Q96300|14337_ARATH	245.19	26	26	12	12	0	26	18	0	18	0	0	12	0	0	3	0	0	0	0	1.0967E6	1.5529E5	1.1881E5		1.5399E6	4.2433E5		2.2915E5			1.5736E5								10	3	33	8	5	0	34	21	0
95	258	P48348|14338_ARATH	144.97	13	7	3	3	0	10	7	0	6	0	0	0	0	0	3	0	0	0	0					1.3331E4														4	1	6	2	1	0	5	8	0
7	108	Q9FZE1|UGDH1_ARATH	262.33	18	5	0	5	5	5	2	7	5	0	5	2	0	0	0	5	5	0	2							1.6815E4												8	3	3	0	2	3	2	1	15
180	333	P29557|IF4E1_WHEAT	136.3	12	0	6	0	0	0	0	0	6	0	0	0	0	0	0	0	0	0	6		5.1622E4						0										9.0278E4	2	2	0	1	0	0	0	0	0
171	245	Q03389|IF4E2_WHEAT	158.92	17	17	7	0	0	11	0	0	7	0	0	0	0	0	0	0	0	0	0	1.3754E5	1.2738E4			6.2321E4			2.0346E4											3	3	3	2	0	0	4	0	0
231	189	Q9SIV2|PSD2A_ARATH	132.76	4	0	0	0	3	0	0	0	0	0	0	0	0	0	0	2	0	0	0				1.2901E4											8.0881E3				3	3	0	0	0	2	0	0	0
107	320	Q9SEI3|PS10A_ARATH	125.79	6	6	0	3	0	0	0	0	3	0	3	0	0	0	0	0	0	0	3	2.3074E4																		2	1	4	0	1	0	0	0	0
107	318	Q9MAK9|PS10B_ARATH	125.79	6	6	0	3	0	0	0	0	3	0	3	0	0	0	0	0	0	0	3	2.3074E4																		2	1	4	0	1	0	0	0	0
129	135	Q9S7C0|HSP7O_ARATH	180.05	6	0	0	0	6	0	0	0	0	0	0	0	0	0	0	3	0	0	0				1.0045E5											4.4117E4				5	5	0	0	0	6	0	0	0
129	134	F4HQD4|HSP7P_ARATH	180.05	6	0	0	0	6	0	0	0	0	0	0	0	0	0	0	3	0	0	0				1.0045E5											4.4117E4				5	5	0	0	0	6	0	0	0
21	11	O65719|HSP7C_ARATH	278.51	29	12	7	7	0	15	5	2	11	13	0	4	0	0	0	3	0	0	5					3.0338E4			1.4449E4			8.2182E3								15	1	11	5	4	0	10	2	1
50	348	Q8H159|UBQ10_ARATH	193.91	10	7	4	3	2	7	2	0	2	2	0	3	0	0	0	2	0	0	7	3.9152E5	6.7683E4	1.5383E4	1.635E4	6.7259E5	1.8255E5		2.1413E4	1.6182E3		2.3545E4				3.2301E3			3.7068E5	5	5	11	4	1	1	10	4	0
50	344	P0CH33|UBQ11_ARATH	193.91	21	14	8	6	4	14	4	0	4	4	0	6	0	0	0	4	0	0	14	3.9152E5	6.7683E4	1.5383E4	1.635E4	6.7259E5	1.8255E5		2.1413E4	1.6182E3		2.3545E4				3.2301E3			3.7068E5	5	5	11	4	1	1	10	4	0
50	290	Q3E7K8|UBQ12_ARATH	193.91	20	13	8	6	4	13	4	0	4	4	0	6	0	0	0	4	0	0	13	3.9152E5	6.7683E4	1.5383E4	1.635E4	6.7259E5	1.8255E5		2.1413E4	1.6182E3		2.3545E4				3.2301E3			3.7068E5	5	5	11	4	1	1	10	4	0
50	345	Q3E7T8|UBQ14_ARATH	193.91	15	10	6	4	3	10	3	0	3	3	0	4	0	0	0	3	0	0	10	3.9152E5	6.7683E4	1.5383E4	1.635E4	6.7259E5	1.8255E5		2.1413E4	1.6182E3		2.3545E4				3.2301E3			3.7068E5	5	5	11	4	1	1	10	4	0
50	346	Q1EC66|UBQ3_ARATH	193.91	15	10	6	4	3	10	3	0	3	3	0	4	0	0	0	3	0	0	10	3.9152E5	6.7683E4	1.5383E4	1.635E4	6.7259E5	1.8255E5		2.1413E4	1.6182E3		2.3545E4				3.2301E3			3.7068E5	5	5	11	4	1	1	10	4	0
50	347	P0CH32|UBQ4_ARATH	193.91	12	8	5	3	2	8	2	0	2	2	0	3	0	0	0	2	0	0	8	3.9152E5	6.7683E4	1.5383E4	1.635E4	6.7259E5	1.8255E5		2.1413E4	1.6182E3		2.3545E4				3.2301E3			3.7068E5	5	5	11	4	1	1	10	4	0
50	307	Q9FHQ6|UBQ9_ARATH	193.91	15	10	6	4	3	10	3	0	3	3	0	4	0	0	0	3	0	0	10	3.9152E5	6.7683E4	1.5383E4	1.635E4	6.7259E5	1.8255E5		2.1413E4	1.6182E3		2.3545E4				3.2301E3			3.7068E5	5	5	11	4	1	1	10	4	0
188	402	O23715|PSA3_ARATH	98.2	11	0	3	11	0	0	0	0	3	0	0	3	0	0	0	0	0	0	0		1.6795E5	1.2827E5					1.0931E5			1.6655E5								2	2	0	3	2	0	0	0	0
174	725	O81148|PSA4A_ARATH	81.53	4	0	4	4	0	0	0	0	4	0	0	4	0	0	0	0	0	0	0		2.4431E5	1.9489E5					2.2386E5			2.2708E5								1	1	0	3	3	0	0	0	0
138	255	O81149|PSA5A_ARATH	166.54	19	0	11	11	0	0	0	0	4	0	0	8	0	0	0	0	0	0	0		1.8323E5	1.3145E5					1.1556E5			6.6437E4								4	4	0	4	6	0	0	0	0
138	259	Q42134|PSA5B_ARATH	166.54	19	0	11	11	0	0	0	0	4	0	0	8	0	0	0	0	0	0	0		1.8323E5	1.3145E5					1.1556E5			6.6437E4								4	4	0	4	6	0	0	0	0
93	236	O81147|PSA6B_ARATH	191.82	15	0	15	15	0	0	0	0	15	0	0	15	0	0	0	0	0	0	0		5.5297E5	4.0525E5					3.7873E5			4.4896E5								4	4	0	13	7	0	0	0	0
119	359	P30186|PSA7A_ARATH	124.92	8	8	0	0	0	8	4	0	0	0	0	0	0	0	0	0	0	0	0	3.752E5				4.3793E5	2.961E5													2	2	8	0	0	0	6	4	0
119	329	O24616|PSA7B_ARATH	124.92	8	8	0	0	0	8	4	0	0	0	0	0	0	0	0	0	0	0	0	3.752E5				4.3793E5	2.961E5													2	2	8	0	0	0	6	4	0
159	1337	Q8LD27|PSB6_ARATH	76.74	4	0	0	0	0	0	0	0	0	0	0	0	0	0	0	0	0	0	4																		2.052E5	1	1	0	0	0	0	0	0	0
148	645	Q7DLS1|PSB7B_ARATH	129.77	8	0	8	5	0	0	0	0	4	0	0	5	3	0	0	0	0	0	5		1.7757E5	7.8941E4					2.9983E4			3.1273E4	6.0667E4						8.8217E4	3	3	0	4	2	0	0	0	0
174	1007	F4JJE5|PSA4B_ARATH	81.53	4	0	4	4	0	0	0	0	4	0	0	4	0	0	0	0	0	0	0		2.4431E5	1.9489E5					2.2386E5			2.2708E5								1	1	0	3	3	0	0	0	0
50	327	P59271|R27AA_ARATH	193.91	30	20	12	8	6	20	6	0	6	6	0	8	0	0	0	6	0	0	20	3.9152E5	6.7683E4	1.5383E4	1.635E4	6.7259E5	1.8255E5		2.1413E4	1.6182E3		2.3545E4				3.2301E3			3.7068E5	5	5	11	4	1	1	10	4	0
50	328	P59232|R27AB_ARATH	193.91	30	20	11	8	6	20	6	0	6	6	0	8	0	0	0	6	0	0	20	3.9152E5	6.7683E4	1.5383E4	1.635E4	6.7259E5	1.8255E5		2.1413E4	1.6182E3		2.3545E4				3.2301E3			3.7068E5	5	5	11	4	1	1	10	4	0
50	322	P59233|R27AC_ARATH	193.91	30	20	11	8	6	20	6	0	6	6	0	8	0	0	0	6	0	0	20	3.9152E5	6.7683E4	1.5383E4	1.635E4	6.7259E5	1.8255E5		2.1413E4	1.6182E3		2.3545E4				3.2301E3			3.7068E5	5	5	11	4	1	1	10	4	0
50	358	B9DHA6|RL40A_ARATH	193.91	37	24	14	10	7	24	7	0	7	7	0	10	0	0	0	7	0	0	24	3.9152E5	6.7683E4	1.5383E4	1.635E4	6.7259E5	1.8255E5		2.1413E4	1.6182E3		2.3545E4				3.2301E3			3.7068E5	5	5	11	4	1	1	10	4	0
50	357	Q42202|RL40B_ARATH	193.91	37	24	14	10	7	24	7	0	7	7	0	10	0	0	0	7	0	0	24	3.9152E5	6.7683E4	1.5383E4	1.635E4	6.7259E5	1.8255E5		2.1413E4	1.6182E3		2.3545E4				3.2301E3			3.7068E5	5	5	11	4	1	1	10	4	0
167	79	P20973|UBE11_WHEAT	179.64	11	0	0	0	5	0	0	0	0	0	0	0	0	0	0	2	0	0	0				2.6387E4											6.5048E3				7	7	0	0	0	4	0	0	0
167	82	P31251|UBE12_WHEAT	179.64	11	0	0	0	5	0	0	0	0	0	0	0	0	0	0	2	0	0	0				2.6387E4											6.5048E3				7	7	0	0	0	4	0	0	0
50	303	Q9SHE7|RUB1_ARATH	193.91	30	20	12	8	6	20	6	0	6	6	0	8	0	0	0	6	0	0	20	3.9152E5	6.7683E4	1.5383E4	1.635E4	6.7259E5	1.8255E5		2.1413E4	1.6182E3		2.3545E4				3.2301E3			3.7068E5	5	5	11	4	1	1	10	4	0
50	302	Q8RUC6|RUB2_ARATH	193.91	31	20	12	8	6	20	6	0	6	6	0	8	0	0	0	6	0	0	20	3.9152E5	6.7683E4	1.5383E4	1.635E4	6.7259E5	1.8255E5		2.1413E4	1.6182E3		2.3545E4				3.2301E3			3.7068E5	5	5	11	4	1	1	10	4	0
143	739	O24456|GBLPA_ARATH	97.82	3	0	0	0	0	0	0	0	0	0	3	0	0	0	0	0	3	0	0										5.9492E4						2.0402E4			1	1	0	0	0	0	0	0	0
143	451	Q9C4Z6|GPLPB_ARATH	97.82	3	0	0	0	0	0	0	0	0	0	3	0	0	0	0	0	3	0	0										5.9492E4						2.0402E4			1	1	0	0	0	0	0	0	0
143	604	Q9LV28|GPLPC_ARATH	97.82	3	0	0	0	0	0	0	0	0	0	3	0	0	0	0	0	3	0	0										5.9492E4						2.0402E4			1	1	0	0	0	0	0	0	0
294	1757	Q9C958|SRK2B_ARATH	54.22	4	4	0	0	0	0	0	0	0	0	0	0	0	0	0	0	0	0	0	8.0245E3																		1	1	1	0	0	0	0	0	0
97	107	Q6W8Q2|REHY_WHEAT	195.59	27	0	0	0	0	0	0	0	0	0	0	0	0	0	0	0	0	0	18																		2.3381E5	7	7	0	0	0	0	0	0	0
95	277	P48349|14336_ARATH	144.97	13	7	3	3	0	10	7	0	6	0	0	0	0	0	3	0	0	0	0					1.3331E4														4	1	6	2	1	0	5	8	0
365	2728	Q9SAR5|AKR2A_ARATH	52.84	4	0	0	0	0	4	0	0	0	0	0	0	0	0	0	0	0	0	0					4.171E3														1	1	0	0	0	0	1	0	0
365	5437	Q29Q26|AKR2B_ARATH	52.84	3	0	0	0	0	3	0	0	0	0	0	0	0	0	0	0	0	0	0					4.171E3														1	1	0	0	0	0	1	0	0
308	304	O82143|PSMDA_ORYSJ	55.3	4	0	0	0	0	4	0	0	0	0	0	0	0	0	0	0	0	0	0					4.4592E4														1	1	0	0	0	0	1	0	0
270	443	O04331|PHB3_ARATH	83.41	3	3	0	0	0	3	0	0	0	0	0	0	0	0	0	0	0	0	0	4.9667E3				4.4788E3														1	1	1	0	0	0	1	0	0
160	85	Q03387|IF4G1_WHEAT	179.4	7	0	1	0	0	1	0	0	0	0	0	0	0	0	0	0	0	0	5		2.4705E4			3.564E4													1.5298E5	6	6	0	1	0	0	1	0	0
108	283	Q9SID0|SCRK1_ARATH	128.24	7	0	0	0	0	0	0	0	0	0	7	0	0	0	0	0	7	0	0										7.7515E4						2.4478E4			2	1	0	0	0	0	0	0	0
291	1185	Q8VZH2|APM1_ARATH	63.53	1	0	0	0	1	0	0	0	0	0	0	0	0	0	0	1	0	0	0				1.1455E4											1.4727E4				1	1	0	0	0	1	0	0	0
88	366	Q9LHG9|NACA1_ARATH	176.82	15	15	15	7	0	15	15	0	15	0	0	7	0	0	0	0	0	0	15	1.3252E5	9.8581E4	3.8451E4		2.4332E5	1.5691E5		1.0901E5			5.9516E4							2.0715E5	2	2	3	2	2	0	2	5	0
88	363	Q6ICZ8|NACA3_ARATH	176.82	15	15	15	7	0	15	15	0	15	0	0	7	0	0	0	0	0	0	15	1.3252E5	9.8581E4	3.8451E4		2.4332E5	1.5691E5		1.0901E5			5.9516E4							2.0715E5	2	2	3	2	2	0	2	5	0
5	8	P32112|SAHH_WHEAT	353.76	45	3	0	0	0	5	0	0	2	0	0	0	0	3	0	0	0	0	2	2.056E4				2.9964E4			1.6569E4					2.275E3					1.3643E4	22	22	2	0	0	0	3	0	0
Cytoskeleton
Protein Group	Protein ID	Accession	-10lgP	Coverage (%)	Coverage (%)																		Area																				#Spec
					Control-1	Control-2	Control-3	Control-4	Control-5	Control-6	Control-7	Control-8	Control-9	Control-10	Control-11	Control-12	Control-13	Control-14	Control-15	Control-16	Control-17	Control-18	Control-1	Control-2	Control-3	Control-4	Control-5	Control-6	Control-7	Control-8	Control-9	Control-10	Control-11	Control-12	Control-13	Control-14	Control-15	Control-16	Control-17	Control-18	#Peptides	#Unique	Control-1	Control-2	Control-3	Control-4	Control-5	Control-6	Control-7
26	26	P53496|ACT11_ARATH	296.5	37	15	11	10	5	15	8	8	11	0	8	10	0	0	0	0	8	0	8	5.3051E4	3.4698E4	2.696E4		5.827E4			2.8883E4			2.2563E4								12	1	11	5	6	1	9	5	3
12	32	P53497|ACT12_ARATH	303.54	37	15	11	10	7	15	10	8	11	0	8	10	0	0	0	0	10	0	10	1.7137E5	1.0346E5	8.4872E4	3.3492E3	1.8571E5	8.4025E4		1.04E5			8.1434E4					4.2967E3		5.6612E4	12	1	13	6	7	3	10	6	3
12	31	P53494|ACT4_ARATH	303.54	37	15	11	10	7	15	10	8	11	0	8	10	0	0	0	0	10	0	10	1.7137E5	1.0346E5	8.4872E4	3.3492E3	1.8571E5	8.4025E4		1.04E5			8.1434E4					4.2967E3		5.6612E4	12	1	13	6	7	3	10	6	3
Endoplasmic reticulum
Protein Group	Protein ID	Accession	-10lgP	Coverage (%)	Coverage (%)																		Area																				#Spec
					Control-1	Control-2	Control-3	Control-4	Control-5	Control-6	Control-7	Control-8	Control-9	Control-10	Control-11	Control-12	Control-13	Control-14	Control-15	Control-16	Control-17	Control-18	Control-1	Control-2	Control-3	Control-4	Control-5	Control-6	Control-7	Control-8	Control-9	Control-10	Control-11	Control-12	Control-13	Control-14	Control-15	Control-16	Control-17	Control-18	#Peptides	#Unique	Control-1	Control-2	Control-3	Control-4	Control-5	Control-6	Control-7
284	608	O22263|PDI21_ARATH	70.34	3	0	0	0	0	0	0	0	0	0	3	0	0	0	0	0	0	0	0										6.76E3									1	1	0	0	0	0	0	0	0
199	227	P36397|ARF1_ARATH	149	20	0	0	0	0	0	0	0	0	0	0	0	0	0	0	0	0	0	14																		1.6005E5	3	3	0	0	0	0	0	0	0
202	295	O04834|SAR1A_ARATH	134.57	13	0	0	0	0	0	0	0	0	0	0	0	0	0	0	0	0	0	13																		7.0783E4	2	2	0	0	0	0	0	0	0
52	49	Q39043|BIP2_ARATH	252.01	14	6	3	4	0	5	4	4	3	6	0	3	0	0	0	3	0	0	3	8.6735E4	4.9091E4	6.0828E3		4.2791E4	2.0111E4	4.5812E3	1.6363E4	1.5339E4		8.8094E4								11	9	6	3	2	0	3	2	4
Extracellular
Protein Group	Protein ID	Accession	-10lgP	Coverage (%)	Coverage (%)																		Area																				#Spec
					Control-1	Control-2	Control-3	Control-4	Control-5	Control-6	Control-7	Control-8	Control-9	Control-10	Control-11	Control-12	Control-13	Control-14	Control-15	Control-16	Control-17	Control-18	Control-1	Control-2	Control-3	Control-4	Control-5	Control-6	Control-7	Control-8	Control-9	Control-10	Control-11	Control-12	Control-13	Control-14	Control-15	Control-16	Control-17	Control-18	#Peptides	#Unique	Control-1	Control-2	Control-3	Control-4	Control-5	Control-6	Control-7
108	312	Q9LNE4|SCRK3_ARATH	128.24	6	0	0	0	0	0	0	0	0	0	6	0	0	0	0	0	6	0	0										7.7515E4						2.4478E4			2	1	0	0	0	0	0	0	0
108	364	Q9LNE3|SCRK2_ARATH	128.24	7	0	0	0	0	0	0	0	0	0	7	0	0	0	0	0	7	0	0										7.7515E4						2.4478E4			2	1	0	0	0	0	0	0	0
Golgi apparatus
Protein Group	Protein ID	Accession	-10lgP	Coverage (%)	Coverage (%)																		Area																				#Spec
					Control-1	Control-2	Control-3	Control-4	Control-5	Control-6	Control-7	Control-8	Control-9	Control-10	Control-11	Control-12	Control-13	Control-14	Control-15	Control-16	Control-17	Control-18	Control-1	Control-2	Control-3	Control-4	Control-5	Control-6	Control-7	Control-8	Control-9	Control-10	Control-11	Control-12	Control-13	Control-14	Control-15	Control-16	Control-17	Control-18	#Peptides	#Unique	Control-1	Control-2	Control-3	Control-4	Control-5	Control-6	Control-7
122	249	O80501|RAH1B_ARATH	114.34	11	0	0	0	0	0	0	0	0	0	0	0	0	0	0	0	0	0	11																		4.063E4	2	1	0	0	0	0	0	0	0
122	289	Q9SMR4|RAH1C_ARATH	114.34	10	0	0	0	0	0	0	0	0	0	0	0	0	0	0	0	0	0	10																		4.063E4	2	1	0	0	0	0	0	0	0
88	363	Q6ICZ8|NACA3_ARATH	176.82	15	15	15	7	0	15	15	0	15	0	0	7	0	0	0	0	0	0	15	1.3252E5	9.8581E4	3.8451E4		2.4332E5	1.5691E5		1.0901E5			5.9516E4							2.0715E5	2	2	3	2	2	0	2	5	0
199	227	P36397|ARF1_ARATH	149	20	0	0	0	0	0	0	0	0	0	0	0	0	0	0	0	0	0	14																		1.6005E5	3	3	0	0	0	0	0	0	0
354	4365	Q9LF09|CSLAB_ARATH	50.58	2	0	0	0	0	0	0	0	0	0	0	0	0	0	0	0	2	0	0																1.2317E3			1	1	0	0	0	0	0	0	0
161	130	Q9LZI2|UXS2_ARATH	165.22	13	2	0	0	0	0	0	0	0	0	2	0	0	0	0	0	2	0	0	0									1.847E4						1.5306E4			6	5	1	0	0	0	0	0	0
161	121	Q8S8T4|UXS4_ARATH	165.22	13	2	0	0	0	0	0	0	0	0	2	0	0	0	0	0	2	0	0	0									1.847E4						1.5306E4			6	5	1	0	0	0	0	0	0
199	225	Q9LQC8|ARF2A_ARATH	149	20	0	0	0	0	0	0	0	0	0	0	0	0	0	0	0	0	0	14																		1.6005E5	3	3	0	0	0	0	0	0	0
199	224	P0DH91|ARF2B_ARATH	149	20	0	0	0	0	0	0	0	0	0	0	0	0	0	0	0	0	0	14																		1.6005E5	3	3	0	0	0	0	0	0	0
63	181	Q9LNW1|RAA2B_ARATH	193.3	22	5	13	13	0	5	5	0	10	0	0	8	0	0	0	0	0	0	17		1.0521E4	1.1328E4								7.0443E3							1.9541E4	5	1	1	6	6	0	1	1	0
63	163	Q96283|RAA2C_ARATH	193.3	22	5	13	13	0	5	5	0	10	0	0	8	0	0	0	0	0	0	17		1.0521E4	1.1328E4								7.0443E3							1.9541E4	5	1	1	6	6	0	1	1	0
122	270	Q9SID8|RAH1D_ARATH	114.34	11	0	0	0	0	0	0	0	0	0	0	0	0	0	0	0	0	0	11																		4.063E4	2	1	0	0	0	0	0	0	0
122	226	Q9LFT9|RAH1E_ARATH	114.34	11	0	0	0	0	0	0	0	0	0	0	0	0	0	0	0	0	0	11																		4.063E4	2	1	0	0	0	0	0	0	0
202	295	O04834|SAR1A_ARATH	134.57	13	0	0	0	0	0	0	0	0	0	0	0	0	0	0	0	0	0	13																		7.0783E4	2	2	0	0	0	0	0	0	0
74	109	P28186|RAE1C_ARATH	189.15	25	0	0	6	0	0	0	0	0	0	0	0	0	0	0	0	0	0	25			0															2.3744E5	5	3	0	0	1	0	0	0	0
74	179	Q9LZD4|RAE1D_ARATH	189.15	25	0	0	6	0	0	0	0	0	0	0	0	0	0	0	0	0	0	25			0															2.3744E5	5	3	0	0	1	0	0	0	0
Membrane
Protein Group	Protein ID	Accession	-10lgP	Coverage (%)	Coverage (%)																		Area																				#Spec
					Control-1	Control-2	Control-3	Control-4	Control-5	Control-6	Control-7	Control-8	Control-9	Control-10	Control-11	Control-12	Control-13	Control-14	Control-15	Control-16	Control-17	Control-18	Control-1	Control-2	Control-3	Control-4	Control-5	Control-6	Control-7	Control-8	Control-9	Control-10	Control-11	Control-12	Control-13	Control-14	Control-15	Control-16	Control-17	Control-18	#Peptides	#Unique	Control-1	Control-2	Control-3	Control-4	Control-5	Control-6	Control-7
287	403	Q9SSQ9|PLDA2_ARATH	63.98	2	0	0	0	0	0	0	0	0	2	0	0	0	0	0	0	0	0	0									3.8355E3										1	1	0	0	0	0	0	0	0
116	627	Q42564|APX3_ARATH	91.83	3	3	3	3	0	3	0	0	3	0	0	3	0	0	0	0	0	0	0	0	7.1968E5	1.509E5		1.9123E5			4.0972E5			4.8257E5								1	1	1	7	3	0	4	0	0
116	1633	Q7XZP5|APX5_ARATH	91.83	3	3	3	3	0	3	0	0	3	0	0	3	0	0	0	0	0	0	0	0	7.1968E5	1.509E5		1.9123E5			4.0972E5			4.8257E5								1	1	1	7	3	0	4	0	0
235	405	P46524|CO410_WHEAT	78.3	12	0	0	0	0	0	0	0	0	0	0	5	0	0	0	0	0	0	0											5.4194E3								2	2	0	0	0	0	0	0	0
184	133	P93596|CP51_WHEAT	145.7	12	0	0	0	0	0	0	0	0	0	0	0	0	3	0	0	0	0	0													5.4328E3						5	5	0	0	0	0	0	0	0
155	144	Q9LS94|RAG3F_ARATH	138.85	19	0	0	0	0	0	0	0	0	0	0	0	0	0	0	0	0	0	10																		1.4397E5	4	3	0	0	0	0	0	0	0
Mitochondrion
Protein Group	Protein ID	Accession	-10lgP	Coverage (%)	Coverage (%)																		Area																				#Spec
					Control-1	Control-2	Control-3	Control-4	Control-5	Control-6	Control-7	Control-8	Control-9	Control-10	Control-11	Control-12	Control-13	Control-14	Control-15	Control-16	Control-17	Control-18	Control-1	Control-2	Control-3	Control-4	Control-5	Control-6	Control-7	Control-8	Control-9	Control-10	Control-11	Control-12	Control-13	Control-14	Control-15	Control-16	Control-17	Control-18	#Peptides	#Unique	Control-1	Control-2	Control-3	Control-4	Control-5	Control-6	Control-7
253	646	Q42592|APXS_ARATH	91.74	2	2	0	0	0	2	0	0	0	0	0	0	0	0	0	0	0	0	0	3.5227E4				4.5924E4														1	1	1	0	0	0	1	0	0
140	200	Q42669|ACOHC_CUCMC	165.66	6	0	0	0	2	0	0	0	0	0	0	0	0	0	0	2	0	0	0				1.2822E4															3	1	0	0	0	4	0	0	0
76	39	P38076|CYSK_WHEAT	281.82	50	0	0	0	0	0	0	0	0	0	19	0	0	0	0	0	4	0	0										9.7666E4									12	11	0	0	0	0	0	0	0
126	73	Q42560|ACO1_ARATH	197	10	0	0	0	3	0	0	0	0	0	0	0	0	0	0	2	0	0	0				3.7863E4															8	4	0	0	0	4	0	0	0
100	68	Q9SIB9|ACO3M_ARATH	228.68	10	0	0	0	2	0	0	0	0	0	0	0	0	0	0	3	0	0	0				8.6108E4											4.0684E4				7	2	0	0	0	3	0	0	0
62	294	P48491|TPIS_ARATH	129.02	7	0	7	7	0	0	0	0	4	0	0	4	4	0	0	0	0	0	7		7.9706E5	6.8146E5					2.0218E5			1.675E5	5.4516E3						1.1405E6	2	2	0	6	7	0	0	0	0
266	529	Q39243|TRXB1_ARATH	68.98	4	0	0	0	0	0	0	0	0	0	4	0	0	0	0	0	0	0	0										1.6867E4									1	1	0	0	0	0	0	0	0
266	613	Q39242|TRXB2_ARATH	68.98	4	0	0	0	0	0	0	0	0	0	4	0	0	0	0	0	0	0	0										1.6867E4									1	1	0	0	0	0	0	0	0
130	571	O48661|SPDS2_ARATH	121.02	8	0	0	0	0	0	0	0	0	0	8	0	0	0	0	0	4	0	0										7.3913E4						6.0562E4			2	2	0	0	0	0	0	0	0
125	152	Q9ZP06|MDHM1_ARATH	214.12	19	0	0	0	0	0	0	0	0	0	7	0	0	0	0	0	6	0	0										9.0315E4						5.9767E4			7	5	0	0	0	0	0	0	0
205	191	P68538|MI25_WHEAT	100.64	11	0	0	0	0	0	0	0	0	0	0	0	0	0	0	0	0	0	7																		2.3855E4	2	2	0	0	0	0	0	0	0
29	7	P12862|ATPAM_WHEAT	304.66	41	0	0	0	0	0	0	0	0	0	0	0	0	2	0	0	0	0	5													7.7894E2					3.8635E4	17	10	0	0	0	0	0	0	0
58	42	P83483|ATPBM_ARATH	254.58	24	0	0	0	0	4	0	0	0	0	0	0	0	2	0	0	0	0	0					2.8742E3								1.0022E3						10	10	0	0	0	0	1	0	0
58	43	P83484|ATPBN_ARATH	254.58	24	0	0	0	0	4	0	0	0	0	0	0	0	2	0	0	0	0	0					2.8742E3								1.0022E3						10	10	0	0	0	0	1	0	0
58	47	Q9C5A9|ATPBO_ARATH	254.58	24	0	0	0	0	4	0	0	0	0	0	0	0	2	0	0	0	0	0					2.8742E3								1.0022E3						10	10	0	0	0	0	1	0	0
256	2798	P07747|CYB_WHEAT	73.55	2	2	0	0	0	2	0	0	0	0	0	0	0	0	0	0	0	0	0	2.7081E4				0														1	1	1	0	0	0	1	0	0
215	2791	P00413|COX2_WHEAT	88.3	7	7	0	0	0	3	7	0	0	0	0	0	0	0	0	0	0	0	0	2.2809E5				1.2786E5	7.0565E4													2	2	2	0	0	0	1	3	0
152	395	Q95748|NDUS3_ARATH	126.96	12	0	0	0	0	0	0	0	0	0	0	0	0	0	0	0	0	0	7																		7.2122E4	2	2	0	0	0	0	0	0	0
270	367	Q9LK25|PHB4_ARATH	83.41	3	3	0	0	0	3	0	0	0	0	0	0	0	0	0	0	0	0	0	4.9667E3				4.4788E3														1	1	1	0	0	0	1	0	0
34	86	P31167|ADT1_ARATH	261.82	23	18	0	0	0	21	16	0	5	0	0	0	0	0	0	0	0	0	0	1.9637E5				2.0944E5	1.6537E5													11	2	34	0	0	0	29	21	0
24	55	Q41629|ADT1_WHEAT	296.74	39	27	0	0	0	32	24	0	6	0	0	0	0	0	0	0	0	0	0	8.5481E5				1.0568E6	1.0118E6													15	6	35	0	0	0	33	28	0
368	4489	Q9C5M0|DTC_ARATH	58.92	4	0	0	0	0	4	0	0	0	0	0	0	0	0	0	0	0	0	0					3.8048E4														1	1	0	0	0	0	1	0	0
94	94	P46274|VDAC1_WHEAT	221.35	28	19	4	0	0	15	25	0	8	0	0	11	0	0	0	0	0	0	0	2.3247E5	6.7647E3			3.5707E5	3.7616E5		1.6272E5			5.7054E4								7	7	6	1	0	0	7	6	0
208	911	Q9FJX3|VDAC2_ARATH	83.05	4	4	0	0	0	4	4	0	0	0	0	0	0	0	0	0	0	0	0	7.1907E4				5.4734E4	5.2189E4													1	1	2	0	0	0	1	1	0
201	420	Q9M2Z8|MPCP2_ARATH	102.96	5	2	0	0	0	0	0	0	0	0	0	0	0	0	0	0	2	0	0	2.4711E4															1.58E3			2	2	1	0	0	0	0	0	0
265	331	Q39026|MPK6_ARATH	98.99	6	0	0	0	0	0	0	2	0	0	0	0	0	0	0	0	0	0	0							8.3178E3												3	3	0	0	0	0	0	0	1
Nucleus
Protein Group	Protein ID	Accession	-10lgP	Coverage (%)	Coverage (%)																		Area																				#Spec
					Control-1	Control-2	Control-3	Control-4	Control-5	Control-6	Control-7	Control-8	Control-9	Control-10	Control-11	Control-12	Control-13	Control-14	Control-15	Control-16	Control-17	Control-18	Control-1	Control-2	Control-3	Control-4	Control-5	Control-6	Control-7	Control-8	Control-9	Control-10	Control-11	Control-12	Control-13	Control-14	Control-15	Control-16	Control-17	Control-18	#Peptides	#Unique	Control-1	Control-2	Control-3	Control-4	Control-5	Control-6	Control-7
156	229	Q9LQQ4|H2B1_ARATH	145.72	20	0	0	7	0	0	0	0	0	0	0	0	0	0	0	0	0	0	20			1.195E4															7.4943E5	3	3	0	0	1	0	0	0	0
156	223	P27807|H2B1_WHEAT	145.72	20	0	0	7	0	0	0	0	0	0	0	0	0	0	0	0	0	0	20			1.195E4															7.4943E5	3	3	0	0	1	0	0	0	0
156	296	Q9FFC0|H2B10_ARATH	145.72	21	0	0	8	0	0	0	0	0	0	0	0	0	0	0	0	0	0	21			1.195E4															7.4943E5	3	3	0	0	1	0	0	0	0
156	300	P40283|H2B11_ARATH	145.72	20	0	0	7	0	0	0	0	0	0	0	0	0	0	0	0	0	0	20			1.195E4															7.4943E5	3	3	0	0	1	0	0	0	0
156	203	P05621|H2B2_WHEAT	145.72	20	0	0	7	0	0	0	0	0	0	0	0	0	0	0	0	0	0	20			1.195E4															7.4943E5	3	3	0	0	1	0	0	0	0
156	278	Q9SI96|H2B3_ARATH	145.72	20	0	0	7	0	0	0	0	0	0	0	0	0	0	0	0	0	0	20			1.195E4															7.4943E5	3	3	0	0	1	0	0	0	0
156	240	Q43217|H2B3_WHEAT	145.72	22	0	0	8	0	0	0	0	0	0	0	0	0	0	0	0	0	0	22			1.195E4															7.4943E5	3	3	0	0	1	0	0	0	0
156	284	Q43215|H2B4_WHEAT	145.72	22	0	0	8	0	0	0	0	0	0	0	0	0	0	0	0	0	0	22			1.195E4															7.4943E5	3	3	0	0	1	0	0	0	0
156	196	Q43216|H2B5_WHEAT	145.72	22	0	0	8	0	0	0	0	0	0	0	0	0	0	0	0	0	0	22			1.195E4															7.4943E5	3	3	0	0	1	0	0	0	0
156	313	O23629|H2B6_ARATH	145.72	20	0	0	7	0	0	0	0	0	0	0	0	0	0	0	0	0	0	20			1.195E4															7.4943E5	3	3	0	0	1	0	0	0	0
156	273	Q9LZT0|H2B7_ARATH	145.72	21	0	0	8	0	0	0	0	0	0	0	0	0	0	0	0	0	0	21			1.195E4															7.4943E5	3	3	0	0	1	0	0	0	0
102	297	P59259|H4_ARATH	139.66	31	12	10	10	0	0	0	0	0	0	0	10	0	0	0	0	0	0	31	1.2117E4	2.6703E4	2.7179E4								1.0885E4							3.5954E5	3	3	1	1	1	0	0	0	0
102	298	P62785|H41_WHEAT	139.66	31	12	10	10	0	0	0	0	0	0	0	10	0	0	0	0	0	0	31	1.2117E4	2.6703E4	2.7179E4								1.0885E4							3.5954E5	3	3	1	1	1	0	0	0	0
102	293	P62786|H42_WHEAT	139.66	31	12	10	10	0	0	0	0	0	0	0	10	0	0	0	0	0	0	31	1.2117E4	2.6703E4	2.7179E4								1.0885E4							3.5954E5	3	3	1	1	1	0	0	0	0
22	148	P46077|14334_ARATH	228.62	20	20	7	10	0	20	16	0	13	0	0	7	0	0	3	0	0	0	0	1.0075E6		9.9225E4		1.1754E6	1.3559E6		1.0467E5			1.1645E5								8	1	32	5	4	0	30	20	0
43	211	P42644|14333_ARATH	211.9	20	20	3	6	0	20	14	0	9	0	0	0	0	0	3	0	0	0	0	4.2978E5		3.0486E4		4.406E5			3.2256E4											7	1	22	2	2	0	20	17	0
54	162	P25858|G3PC1_ARATH	195.26	20	9	4	14	0	9	9	0	13	0	9	4	0	0	0	9	0	0	4	1.7568E5	6.6077E4	1.7045E5		1.9058E5	1.7209E5		2.1645E5		6.1837E4	1.0466E5				1.0276E4			1.1835E5	5	5	3	1	4	0	3	5	0
54	141	Q9FX54|G3PC2_ARATH	195.26	20	9	4	14	0	9	9	0	13	0	9	4	0	0	0	9	0	0	4	1.7568E5	6.6077E4	1.7045E5		1.9058E5	1.7209E5		2.1645E5		6.1837E4	1.0466E5				1.0276E4			1.1835E5	5	5	3	1	4	0	3	5	0
154	220	P48347|14310_ARATH	139.02	10	10	0	0	0	7	4	0	3	0	0	0	0	0	0	0	0	0	0	6.6978E4							1.2123E4											3	1	4	0	0	0	3	2	0
16	137	Q96300|14337_ARATH	245.19	26	26	12	12	0	26	18	0	18	0	0	12	0	0	3	0	0	0	0	1.0967E6	1.5529E5	1.1881E5		1.5399E6	4.2433E5		2.2915E5			1.5736E5								10	3	33	8	5	0	34	21	0
95	258	P48348|14338_ARATH	144.97	13	7	3	3	0	10	7	0	6	0	0	0	0	0	3	0	0	0	0					1.3331E4														4	1	6	2	1	0	5	8	0
7	108	Q9FZE1|UGDH1_ARATH	262.33	18	5	0	5	5	5	2	7	5	0	5	2	0	0	0	5	5	0	2							1.6815E4												8	3	3	0	2	3	2	1	15
180	333	P29557|IF4E1_WHEAT	136.3	12	0	6	0	0	0	0	0	6	0	0	0	0	0	0	0	0	0	6		5.1622E4						0										9.0278E4	2	2	0	1	0	0	0	0	0
171	245	Q03389|IF4E2_WHEAT	158.92	17	17	7	0	0	11	0	0	7	0	0	0	0	0	0	0	0	0	0	1.3754E5	1.2738E4			6.2321E4			2.0346E4											3	3	3	2	0	0	4	0	0
231	189	Q9SIV2|PSD2A_ARATH	132.76	4	0	0	0	3	0	0	0	0	0	0	0	0	0	0	2	0	0	0				1.2901E4											8.0881E3				3	3	0	0	0	2	0	0	0
107	320	Q9SEI3|PS10A_ARATH	125.79	6	6	0	3	0	0	0	0	3	0	3	0	0	0	0	0	0	0	3	2.3074E4																		2	1	4	0	1	0	0	0	0
107	318	Q9MAK9|PS10B_ARATH	125.79	6	6	0	3	0	0	0	0	3	0	3	0	0	0	0	0	0	0	3	2.3074E4																		2	1	4	0	1	0	0	0	0
129	135	Q9S7C0|HSP7O_ARATH	180.05	6	0	0	0	6	0	0	0	0	0	0	0	0	0	0	3	0	0	0				1.0045E5											4.4117E4				5	5	0	0	0	6	0	0	0
129	134	F4HQD4|HSP7P_ARATH	180.05	6	0	0	0	6	0	0	0	0	0	0	0	0	0	0	3	0	0	0				1.0045E5											4.4117E4				5	5	0	0	0	6	0	0	0
21	11	O65719|HSP7C_ARATH	278.51	29	12	7	7	0	15	5	2	11	13	0	4	0	0	0	3	0	0	5					3.0338E4			1.4449E4			8.2182E3								15	1	11	5	4	0	10	2	1
50	348	Q8H159|UBQ10_ARATH	193.91	10	7	4	3	2	7	2	0	2	2	0	3	0	0	0	2	0	0	7	3.9152E5	6.7683E4	1.5383E4	1.635E4	6.7259E5	1.8255E5		2.1413E4	1.6182E3		2.3545E4				3.2301E3			3.7068E5	5	5	11	4	1	1	10	4	0
50	344	P0CH33|UBQ11_ARATH	193.91	21	14	8	6	4	14	4	0	4	4	0	6	0	0	0	4	0	0	14	3.9152E5	6.7683E4	1.5383E4	1.635E4	6.7259E5	1.8255E5		2.1413E4	1.6182E3		2.3545E4				3.2301E3			3.7068E5	5	5	11	4	1	1	10	4	0
50	290	Q3E7K8|UBQ12_ARATH	193.91	20	13	8	6	4	13	4	0	4	4	0	6	0	0	0	4	0	0	13	3.9152E5	6.7683E4	1.5383E4	1.635E4	6.7259E5	1.8255E5		2.1413E4	1.6182E3		2.3545E4				3.2301E3			3.7068E5	5	5	11	4	1	1	10	4	0
50	345	Q3E7T8|UBQ14_ARATH	193.91	15	10	6	4	3	10	3	0	3	3	0	4	0	0	0	3	0	0	10	3.9152E5	6.7683E4	1.5383E4	1.635E4	6.7259E5	1.8255E5		2.1413E4	1.6182E3		2.3545E4				3.2301E3			3.7068E5	5	5	11	4	1	1	10	4	0
50	346	Q1EC66|UBQ3_ARATH	193.91	15	10	6	4	3	10	3	0	3	3	0	4	0	0	0	3	0	0	10	3.9152E5	6.7683E4	1.5383E4	1.635E4	6.7259E5	1.8255E5		2.1413E4	1.6182E3		2.3545E4				3.2301E3			3.7068E5	5	5	11	4	1	1	10	4	0
50	347	P0CH32|UBQ4_ARATH	193.91	12	8	5	3	2	8	2	0	2	2	0	3	0	0	0	2	0	0	8	3.9152E5	6.7683E4	1.5383E4	1.635E4	6.7259E5	1.8255E5		2.1413E4	1.6182E3		2.3545E4				3.2301E3			3.7068E5	5	5	11	4	1	1	10	4	0
50	307	Q9FHQ6|UBQ9_ARATH	193.91	15	10	6	4	3	10	3	0	3	3	0	4	0	0	0	3	0	0	10	3.9152E5	6.7683E4	1.5383E4	1.635E4	6.7259E5	1.8255E5		2.1413E4	1.6182E3		2.3545E4				3.2301E3			3.7068E5	5	5	11	4	1	1	10	4	0
188	402	O23715|PSA3_ARATH	98.2	11	0	3	11	0	0	0	0	3	0	0	3	0	0	0	0	0	0	0		1.6795E5	1.2827E5					1.0931E5			1.6655E5								2	2	0	3	2	0	0	0	0
174	725	O81148|PSA4A_ARATH	81.53	4	0	4	4	0	0	0	0	4	0	0	4	0	0	0	0	0	0	0		2.4431E5	1.9489E5					2.2386E5			2.2708E5								1	1	0	3	3	0	0	0	0
138	255	O81149|PSA5A_ARATH	166.54	19	0	11	11	0	0	0	0	4	0	0	8	0	0	0	0	0	0	0		1.8323E5	1.3145E5					1.1556E5			6.6437E4								4	4	0	4	6	0	0	0	0
138	259	Q42134|PSA5B_ARATH	166.54	19	0	11	11	0	0	0	0	4	0	0	8	0	0	0	0	0	0	0		1.8323E5	1.3145E5					1.1556E5			6.6437E4								4	4	0	4	6	0	0	0	0
93	236	O81147|PSA6B_ARATH	191.82	15	0	15	15	0	0	0	0	15	0	0	15	0	0	0	0	0	0	0		5.5297E5	4.0525E5					3.7873E5			4.4896E5								4	4	0	13	7	0	0	0	0
119	359	P30186|PSA7A_ARATH	124.92	8	8	0	0	0	8	4	0	0	0	0	0	0	0	0	0	0	0	0	3.752E5				4.3793E5	2.961E5													2	2	8	0	0	0	6	4	0
119	329	O24616|PSA7B_ARATH	124.92	8	8	0	0	0	8	4	0	0	0	0	0	0	0	0	0	0	0	0	3.752E5				4.3793E5	2.961E5													2	2	8	0	0	0	6	4	0
159	1337	Q8LD27|PSB6_ARATH	76.74	4	0	0	0	0	0	0	0	0	0	0	0	0	0	0	0	0	0	4																		2.052E5	1	1	0	0	0	0	0	0	0
148	645	Q7DLS1|PSB7B_ARATH	129.77	8	0	8	5	0	0	0	0	4	0	0	5	3	0	0	0	0	0	5		1.7757E5	7.8941E4					2.9983E4			3.1273E4	6.0667E4						8.8217E4	3	3	0	4	2	0	0	0	0
174	1007	F4JJE5|PSA4B_ARATH	81.53	4	0	4	4	0	0	0	0	4	0	0	4	0	0	0	0	0	0	0		2.4431E5	1.9489E5					2.2386E5			2.2708E5								1	1	0	3	3	0	0	0	0
50	327	P59271|R27AA_ARATH	193.91	30	20	12	8	6	20	6	0	6	6	0	8	0	0	0	6	0	0	20	3.9152E5	6.7683E4	1.5383E4	1.635E4	6.7259E5	1.8255E5		2.1413E4	1.6182E3		2.3545E4				3.2301E3			3.7068E5	5	5	11	4	1	1	10	4	0
50	328	P59232|R27AB_ARATH	193.91	30	20	11	8	6	20	6	0	6	6	0	8	0	0	0	6	0	0	20	3.9152E5	6.7683E4	1.5383E4	1.635E4	6.7259E5	1.8255E5		2.1413E4	1.6182E3		2.3545E4				3.2301E3			3.7068E5	5	5	11	4	1	1	10	4	0
50	322	P59233|R27AC_ARATH	193.91	30	20	11	8	6	20	6	0	6	6	0	8	0	0	0	6	0	0	20	3.9152E5	6.7683E4	1.5383E4	1.635E4	6.7259E5	1.8255E5		2.1413E4	1.6182E3		2.3545E4				3.2301E3			3.7068E5	5	5	11	4	1	1	10	4	0
50	358	B9DHA6|RL40A_ARATH	193.91	37	24	14	10	7	24	7	0	7	7	0	10	0	0	0	7	0	0	24	3.9152E5	6.7683E4	1.5383E4	1.635E4	6.7259E5	1.8255E5		2.1413E4	1.6182E3		2.3545E4				3.2301E3			3.7068E5	5	5	11	4	1	1	10	4	0
50	357	Q42202|RL40B_ARATH	193.91	37	24	14	10	7	24	7	0	7	7	0	10	0	0	0	7	0	0	24	3.9152E5	6.7683E4	1.5383E4	1.635E4	6.7259E5	1.8255E5		2.1413E4	1.6182E3		2.3545E4				3.2301E3			3.7068E5	5	5	11	4	1	1	10	4	0
167	79	P20973|UBE11_WHEAT	179.64	11	0	0	0	5	0	0	0	0	0	0	0	0	0	0	2	0	0	0				2.6387E4											6.5048E3				7	7	0	0	0	4	0	0	0
167	82	P31251|UBE12_WHEAT	179.64	11	0	0	0	5	0	0	0	0	0	0	0	0	0	0	2	0	0	0				2.6387E4											6.5048E3				7	7	0	0	0	4	0	0	0
50	303	Q9SHE7|RUB1_ARATH	193.91	30	20	12	8	6	20	6	0	6	6	0	8	0	0	0	6	0	0	20	3.9152E5	6.7683E4	1.5383E4	1.635E4	6.7259E5	1.8255E5		2.1413E4	1.6182E3		2.3545E4				3.2301E3			3.7068E5	5	5	11	4	1	1	10	4	0
50	302	Q8RUC6|RUB2_ARATH	193.91	31	20	12	8	6	20	6	0	6	6	0	8	0	0	0	6	0	0	20	3.9152E5	6.7683E4	1.5383E4	1.635E4	6.7259E5	1.8255E5		2.1413E4	1.6182E3		2.3545E4				3.2301E3			3.7068E5	5	5	11	4	1	1	10	4	0
143	739	O24456|GBLPA_ARATH	97.82	3	0	0	0	0	0	0	0	0	0	3	0	0	0	0	0	3	0	0										5.9492E4						2.0402E4			1	1	0	0	0	0	0	0	0
143	451	Q9C4Z6|GPLPB_ARATH	97.82	3	0	0	0	0	0	0	0	0	0	3	0	0	0	0	0	3	0	0										5.9492E4						2.0402E4			1	1	0	0	0	0	0	0	0
143	604	Q9LV28|GPLPC_ARATH	97.82	3	0	0	0	0	0	0	0	0	0	3	0	0	0	0	0	3	0	0										5.9492E4						2.0402E4			1	1	0	0	0	0	0	0	0
294	1757	Q9C958|SRK2B_ARATH	54.22	4	4	0	0	0	0	0	0	0	0	0	0	0	0	0	0	0	0	0	8.0245E3																		1	1	1	0	0	0	0	0	0
97	107	Q6W8Q2|REHY_WHEAT	195.59	27	0	0	0	0	0	0	0	0	0	0	0	0	0	0	0	0	0	18																		2.3381E5	7	7	0	0	0	0	0	0	0
95	277	P48349|14336_ARATH	144.97	13	7	3	3	0	10	7	0	6	0	0	0	0	0	3	0	0	0	0					1.3331E4														4	1	6	2	1	0	5	8	0
365	2728	Q9SAR5|AKR2A_ARATH	52.84	4	0	0	0	0	4	0	0	0	0	0	0	0	0	0	0	0	0	0					4.171E3														1	1	0	0	0	0	1	0	0
365	5437	Q29Q26|AKR2B_ARATH	52.84	3	0	0	0	0	3	0	0	0	0	0	0	0	0	0	0	0	0	0					4.171E3														1	1	0	0	0	0	1	0	0
308	304	O82143|PSMDA_ORYSJ	55.3	4	0	0	0	0	4	0	0	0	0	0	0	0	0	0	0	0	0	0					4.4592E4														1	1	0	0	0	0	1	0	0
270	443	O04331|PHB3_ARATH	83.41	3	3	0	0	0	3	0	0	0	0	0	0	0	0	0	0	0	0	0	4.9667E3				4.4788E3														1	1	1	0	0	0	1	0	0
160	85	Q03387|IF4G1_WHEAT	179.4	7	0	1	0	0	1	0	0	0	0	0	0	0	0	0	0	0	0	5		2.4705E4			3.564E4													1.5298E5	6	6	0	1	0	0	1	0	0
186	285	Q9LT08|PSDE_ARATH	111.79	6	4	0	0	0	0	0	0	0	0	0	0	0	0	0	0	2	0	0	6.1087E4															3.3524E3			2	2	2	0	0	0	0	0	0
221	573	Q9LPT6|OTU2_ARATH	72.73	5	0	5	5	0	0	0	0	5	0	0	5	0	0	0	0	0	0	0		5.371E4	2.8533E4					4.3284E4			5.8566E4								1	1	0	1	1	0	0	0	0
123	396	Q9FEF8|FBRL1_ARATH	120	7	4	4	4	0	4	4	0	4	0	4	4	0	0	0	0	4	0	4	3.9959E3	1.1093E4	1.7036E4		1.2759E4	0		0		2.3596E4	2.0577E4					3.9996E4		1.1343E4	2	2	1	1	1	0	1	1	0
123	389	Q94AH9|FBRL2_ARATH	120	7	3	3	3	0	3	3	0	3	0	3	3	0	0	0	0	3	0	3	3.9959E3	1.1093E4	1.7036E4		1.2759E4	0		0		2.3596E4	2.0577E4					3.9996E4		1.1343E4	2	2	1	1	1	0	1	1	0
294	5432	P43292|SRK2G_ARATH	54.22	5	5	0	0	0	0	0	0	0	0	0	0	0	0	0	0	0	0	0	8.0245E3																		1	1	1	0	0	0	0	0	0
13	157	P41916|RAN1_ARATH	254.97	36	27	22	21	0	35	20	0	28	0	0	21	6	0	0	0	0	0	9	1.1912E6	1.8338E6	7.3171E5		2.4953E6	1.1354E6		2.0181E6			1.909E6	4.7761E4						1.096E5	9	9	16	16	14	0	29	12	0
13	158	P41917|RAN2_ARATH	254.97	36	27	22	21	0	35	20	0	28	0	0	21	6	0	0	0	0	0	9	1.1912E6	1.8338E6	7.3171E5		2.4953E6	1.1354E6		2.0181E6			1.909E6	4.7761E4						1.096E5	9	9	16	16	14	0	29	12	0
13	159	Q8H156|RAN3_ARATH	254.97	36	27	22	21	0	35	20	0	28	0	0	21	6	0	0	0	0	0	9	1.1912E6	1.8338E6	7.3171E5		2.4953E6	1.1354E6		2.0181E6			1.909E6	4.7761E4						1.096E5	9	9	16	16	14	0	29	12	0
52	49	Q39043|BIP2_ARATH	252.01	14	6	3	4	0	5	4	4	3	6	0	3	0	0	0	3	0	0	3	8.6735E4	4.9091E4	6.0828E3		4.2791E4	2.0111E4	4.5812E3	1.6363E4	1.5339E4		8.8094E4								11	9	6	3	2	0	3	2	4
231	178	Q6XJG8|PSD2B_ARATH	132.76	4	0	0	0	3	0	0	0	0	0	0	0	0	0	0	2	0	0	0				1.2901E4											8.0881E3				3	3	0	0	0	2	0	0	0
Plasma membrane
Protein Group	Protein ID	Accession	-10lgP	Coverage (%)	Coverage (%)																		Area																				#Spec
					Control-1	Control-2	Control-3	Control-4	Control-5	Control-6	Control-7	Control-8	Control-9	Control-10	Control-11	Control-12	Control-13	Control-14	Control-15	Control-16	Control-17	Control-18	Control-1	Control-2	Control-3	Control-4	Control-5	Control-6	Control-7	Control-8	Control-9	Control-10	Control-11	Control-12	Control-13	Control-14	Control-15	Control-16	Control-17	Control-18	#Peptides	#Unique	Control-1	Control-2	Control-3	Control-4	Control-5	Control-6	Control-7
130	571	O48661|SPDS2_ARATH	121.02	8	0	0	0	0	0	0	0	0	0	8	0	0	0	0	0	4	0	0										7.3913E4						6.0562E4			2	2	0	0	0	0	0	0	0
95	277	P48349|14336_ARATH	144.97	13	7	3	3	0	10	7	0	6	0	0	0	0	0	3	0	0	0	0					1.3331E4														4	1	6	2	1	0	5	8	0
308	304	O82143|PSMDA_ORYSJ	55.3	4	0	0	0	0	4	0	0	0	0	0	0	0	0	0	0	0	0	0					4.4592E4														1	1	0	0	0	0	1	0	0
270	443	O04331|PHB3_ARATH	83.41	3	3	0	0	0	3	0	0	0	0	0	0	0	0	0	0	0	0	0	4.9667E3				4.4788E3														1	1	1	0	0	0	1	0	0
108	283	Q9SID0|SCRK1_ARATH	128.24	7	0	0	0	0	0	0	0	0	0	7	0	0	0	0	0	7	0	0										7.7515E4						2.4478E4			2	1	0	0	0	0	0	0	0
231	178	Q6XJG8|PSD2B_ARATH	132.76	4	0	0	0	3	0	0	0	0	0	0	0	0	0	0	2	0	0	0				1.2901E4											8.0881E3				3	3	0	0	0	2	0	0	0
339	1078	Q9SWW6|CESA7_ARATH	56.65	1	0	0	0	0	0	0	0	0	0	0	0	0	0	0	0	0	0	1																		4.9775E3	1	1	0	0	0	0	0	0	0
213	377	Q93YW5|P2C58_ARATH	128.7	11	8	0	0	0	0	0	0	0	0	0	0	0	0	0	0	0	0	0	3.3374E4																		3	2	2	0	0	0	0	0	0
170	559	Q8LAY8|P2C69_ARATH	112.37	5	0	0	0	0	0	0	0	0	0	0	0	0	0	0	0	3	0	0																2.1175E3			2	1	0	0	0	0	0	0	0
178	772	O23016|KCAB_ARATH	76.8	3	0	0	0	0	0	0	0	0	0	3	0	0	0	0	0	3	0	0										2.6175E4						2.1901E3			1	1	0	0	0	0	0	0	0
45	173	Q9FJH0|RAA1F_ARATH	208.9	26	5	15	15	0	10	10	0	15	0	0	10	0	0	0	0	0	0	26		5.691E4	7.0497E4		5.0457E4	2.0379E4		1.0818E5			5.2144E4							2.3246E5	6	1	1	8	7	0	2	3	0
45	117	Q9LK99|RAA1G_ARATH	208.9	26	5	15	15	0	10	10	0	15	0	0	10	0	0	0	0	0	0	26		5.691E4	7.0497E4		5.0457E4	2.0379E4		1.0818E5			5.2144E4							2.3246E5	6	1	1	8	7	0	2	3	0
86	204	Q9FJN8|RAA4A_ARATH	169.86	16	5	16	13	0	5	5	0	10	0	0	8	0	0	0	0	0	0	5		2.2552E4									3.5787E4								4	1	1	6	6	0	1	1	0
151	147	P92963|RAB1C_ARATH	192.48	35	0	0	0	0	0	0	0	0	0	0	0	0	0	0	0	0	0	19																		1.5028E5	6	6	0	0	0	0	0	0	0
74	109	P28186|RAE1C_ARATH	189.15	25	0	0	6	0	0	0	0	0	0	0	0	0	0	0	0	0	0	25			0															2.3744E5	5	3	0	0	1	0	0	0	0
74	179	Q9LZD4|RAE1D_ARATH	189.15	25	0	0	6	0	0	0	0	0	0	0	0	0	0	0	0	0	0	25			0															2.3744E5	5	3	0	0	1	0	0	0	0
Plasmodesma
Protein Group	Protein ID	Accession	-10lgP	Coverage (%)	Coverage (%)																		Area																				#Spec
					Control-1	Control-2	Control-3	Control-4	Control-5	Control-6	Control-7	Control-8	Control-9	Control-10	Control-11	Control-12	Control-13	Control-14	Control-15	Control-16	Control-17	Control-18	Control-1	Control-2	Control-3	Control-4	Control-5	Control-6	Control-7	Control-8	Control-9	Control-10	Control-11	Control-12	Control-13	Control-14	Control-15	Control-16	Control-17	Control-18	#Peptides	#Unique	Control-1	Control-2	Control-3	Control-4	Control-5	Control-6	Control-7
108	364	Q9LNE3|SCRK2_ARATH	128.24	7	0	0	0	0	0	0	0	0	0	7	0	0	0	0	0	7	0	0										7.7515E4						2.4478E4			2	1	0	0	0	0	0	0	0
88	366	Q9LHG9|NACA1_ARATH	176.82	15	15	15	7	0	15	15	0	15	0	0	7	0	0	0	0	0	0	15	1.3252E5	9.8581E4	3.8451E4		2.4332E5	1.5691E5		1.0901E5			5.9516E4							2.0715E5	2	2	3	2	2	0	2	5	0
88	363	Q6ICZ8|NACA3_ARATH	176.82	15	15	15	7	0	15	15	0	15	0	0	7	0	0	0	0	0	0	15	1.3252E5	9.8581E4	3.8451E4		2.4332E5	1.5691E5		1.0901E5			5.9516E4							2.0715E5	2	2	3	2	2	0	2	5	0
Peroxisome
Protein Group	Protein ID	Accession	-10lgP	Coverage (%)	Coverage (%)																		Area																				#Spec
					Control-1	Control-2	Control-3	Control-4	Control-5	Control-6	Control-7	Control-8	Control-9	Control-10	Control-11	Control-12	Control-13	Control-14	Control-15	Control-16	Control-17	Control-18	Control-1	Control-2	Control-3	Control-4	Control-5	Control-6	Control-7	Control-8	Control-9	Control-10	Control-11	Control-12	Control-13	Control-14	Control-15	Control-16	Control-17	Control-18	#Peptides	#Unique	Control-1	Control-2	Control-3	Control-4	Control-5	Control-6	Control-7
108	283	Q9SID0|SCRK1_ARATH	128.24	7	0	0	0	0	0	0	0	0	0	7	0	0	0	0	0	7	0	0										7.7515E4						2.4478E4			2	1	0	0	0	0	0	0	0
230	4501	O04420|URIC_ARATH	72.32	3	0	0	0	0	0	0	0	0	0	3	0	0	0	0	0	3	0	0										6.7497E3						3.1207E3			1	1	0	0	0	0	0	0	0
Secreted
Protein Group	Protein ID	Accession	-10lgP	Coverage (%)	Coverage (%)																		Area																				#Spec
					Control-1	Control-2	Control-3	Control-4	Control-5	Control-6	Control-7	Control-8	Control-9	Control-10	Control-11	Control-12	Control-13	Control-14	Control-15	Control-16	Control-17	Control-18	Control-1	Control-2	Control-3	Control-4	Control-5	Control-6	Control-7	Control-8	Control-9	Control-10	Control-11	Control-12	Control-13	Control-14	Control-15	Control-16	Control-17	Control-18	#Peptides	#Unique	Control-1	Control-2	Control-3	Control-4	Control-5	Control-6	Control-7
25	71	Q05855|PER1_WHEAT	311.61	49	49	0	6	0	43	45	0	0	0	0	0	0	0	0	0	0	0	0	3.4201E6		1.0315E4		2.802E6	2.12E6													12	11	40	0	1	0	33	31	0
103	232	Q8L5C6|XIP1_WHEAT	214.49	15	11	7	0	0	15	6	0	15	0	0	0	0	0	0	0	0	0	0	6.7591E5	1.0093E5			8.9686E5	4.7541E5		2.59E5											5	5	8	4	0	0	8	2	0
133	110	Q41593|SPZ1A_WHEAT	188.22	19	9	0	0	0	16	0	0	0	0	0	0	0	0	3	0	0	0	0	2.552E4				4.4395E4														7	2	7	0	0	0	6	0	0
141	111	P93693|SPZ1B_WHEAT	186.25	19	13	0	0	0	9	0	0	0	0	0	0	0	0	3	0	0	0	0	4.2311E4																		7	2	8	0	0	0	4	0	0
Vacuole
Protein Group	Protein ID	Accession	-10lgP	Coverage (%)	Coverage (%)																		Area																				#Spec
					Control-1	Control-2	Control-3	Control-4	Control-5	Control-6	Control-7	Control-8	Control-9	Control-10	Control-11	Control-12	Control-13	Control-14	Control-15	Control-16	Control-17	Control-18	Control-1	Control-2	Control-3	Control-4	Control-5	Control-6	Control-7	Control-8	Control-9	Control-10	Control-11	Control-12	Control-13	Control-14	Control-15	Control-16	Control-17	Control-18	#Peptides	#Unique	Control-1	Control-2	Control-3	Control-4	Control-5	Control-6	Control-7
5	8	P32112|SAHH_WHEAT	353.76	45	3	0	0	0	5	0	0	2	0	0	0	0	3	0	0	0	0	2	2.056E4				2.9964E4			1.6569E4					2.275E3					1.3643E4	22	22	2	0	0	0	3	0	0
155	144	Q9LS94|RAG3F_ARATH	138.85	19	0	0	0	0	0	0	0	0	0	0	0	0	0	0	0	0	0	10																		1.4397E5	4	3	0	0	0	0	0	0	0
78	22	P11574|VATB1_ARATH	250.32	43	0	0	0	0	0	0	0	0	0	0	0	0	6	0	0	0	0	0													3.012E3						13	1	0	0	0	0	0	0	0
78	19	Q8W4E2|VATB3_ARATH	250.32	43	0	0	0	0	0	0	0	0	0	0	0	0	6	0	0	0	0	0													3.012E3						13	1	0	0	0	0	0	0	0
Unknown
Protein Group	Protein ID	Accession	-10lgP	Coverage (%)	Coverage (%)																		Area																				#Spec
					Control-1	Control-2	Control-3	Control-4	Control-5	Control-6	Control-7	Control-8	Control-9	Control-10	Control-11	Control-12	Control-13	Control-14	Control-15	Control-16	Control-17	Control-18	Control-1	Control-2	Control-3	Control-4	Control-5	Control-6	Control-7	Control-8	Control-9	Control-10	Control-11	Control-12	Control-13	Control-14	Control-15	Control-16	Control-17	Control-18	#Peptides	#Unique	Control-1	Control-2	Control-3	Control-4	Control-5	Control-6	Control-7
290	1546	Q9C5C4|ARGE_ARATH	53.29	2	0	0	0	0	0	0	0	0	0	0	0	0	0	0	0	0	0	0																			1	1	0	0	0	0	0	0	0
190	649	Q8VYF5|NILP1_ARATH	128.9	8	0	0	0	0	0	0	0	0	0	4	0	0	0	0	0	4	0	0										1.898E4						2.349E4			2	2	0	0	0	0	0	0	0
294	4479	Q02066|AAIP_WHEAT	54.22	5	5	0	0	0	0	0	0	0	0	0	0	0	0	0	0	0	0	0	8.0245E3																		1	1	1	0	0	0	0	0	0
294	3616	P43291|SRK2A_ARATH	54.22	4	4	0	0	0	0	0	0	0	0	0	0	0	0	0	0	0	0	0	8.0245E3																		1	1	1	0	0	0	0	0	0
[truncated: 17 more columns]
