# Supplementary material for: S-nitrosylated Proteins Involved in Autophagy in <em>Triticum aestivum</em> Roots: A Bottom-Up Proteomics Approach and In Silico Predictive Algorithms
Source: Preprints.org preprint supplement (doi:10.20944/preprints202308.1129.v1), 2023-08-18
Supplement: Supplementary file 6 [file Table S9 PPI of identified proteins, ATG proteins, and predicted functional partners.xlsx]

## Sheet: Directory
S-nitrosylated proteins involved in autophagy in Triticum aestivum roots: a bottom-up proteomics approach and in silico predictive algorithms
Supporting information 9: PPI of identified proteins, ATG proteins, and predicted functional partners
Anastasia Mazina 1, Julia Shumilina 2, Natalia Gazizova 1, Egor Repkin 3, Andrej Frolov 2 and Farida Minibayeva 1,4*
1	Kazan Institute of Biochemistry and Biophysics, FRC Kazan Scientific Center, Russian Academy of Sciences, Kazan, Russian Federation;
2	Laboratory of Analytical Biochemistry and Biotechnology, Timiryazev Institute of Plant Physiology, Russian Academy of Sciences;
3	Saint Petersburg State University, 199034 Saint Petersburg, Russia;
4	Open Lab ‘Biomarker’, Kazan (Volga Region) Federal University, 420008 Kazan, Russia
*Corresponding authors: Farida Minibayeva
Directory
Table S9	PPI of identified proteins, ATG proteins, and predicted functional partners.

## Sheet: Table S9
#node1	node2	coexpression	experimentally_determined_interaction	database_annotated	automated_textmining	combined_score
EMB2107	RPN2B	0.908	0.877	0.844	0.667	0.999
EMB2107	RPT5B	0.91	0.877	0.844	0.725	0.999
EMB2107	PRC3	0.91	0.877	0.832	0.598	0.999
EMB2107	RPN3A	0.918	0.877	0.919	0.671	0.999
FIB1	PWP2	0.95	0.882	0.845	0.83	0.999
GAPA-2	TPI	0.869	0.71	0.963	0.642	0.999
GAPC2	TPI	0.924	0.71	0.969	0.834	0.999
GAPCP-2	TPI	0.869	0.71	0.969	0.616	0.999
PRC3	EMB2107	0.91	0.877	0.832	0.598	0.999
PWP2	FIB1	0.95	0.882	0.845	0.83	0.999
RPL10A	RPL27AB	0.985	0.847	0.656	0.186	0.999
RPL10AA	RPL27AB	0.974	0.847	0.656	0.51	0.999
RPL19A	RPL7AB	0.986	0.853	0.901	0.453	0.999
RPL19A	RPL27AB	0.984	0.82	0.645	0.484	0.999
RPL21A	RPL7AB	0.982	0.853	0.661	0.407	0.999
RPL21A	RPL27AB	0.983	0.82	0.645	0.534	0.999
RPL27AB	RPP1A	0.985	0.82	0.645	0.353	0.999
RPL27AB	RPL19A	0.984	0.82	0.645	0.484	0.999
RPL27AB	RPL10AA	0.974	0.847	0.656	0.51	0.999
RPL27AB	RPL21A	0.983	0.82	0.645	0.534	0.999
RPL27AB	RPL10A	0.985	0.847	0.656	0.186	0.999
RPL27AB	RPL6A	0.986	0.847	0.656	0.567	0.999
RPL27AB	RPL34A	0.984	0.847	0.644	0.244	0.999
RPL27AB	RPL7AB	0.984	0.867	0.673	0.323	0.999
RPL34A	RPL27AB	0.984	0.847	0.644	0.244	0.999
RPL6A	RPL27AB	0.986	0.847	0.656	0.567	0.999
RPL7AB	RPL27AB	0.984	0.867	0.673	0.323	0.999
RPN2B	EMB2107	0.908	0.877	0.844	0.667	0.999
RPN3A	EMB2107	0.918	0.877	0.919	0.671	0.999
RPP1A	RPL27AB	0.985	0.82	0.645	0.353	0.999
RPT5B	EMB2107	0.91	0.877	0.844	0.725	0.999
TPI	GAPA-2	0.869	0.71	0.963	0.642	0.999
TPI	GAPC2	0.924	0.71	0.969	0.834	0.999
TPI	GAPCP-2	0.869	0.71	0.969	0.616	0.999
RPL27AB	RPS12A	0.982	0.867	0.335	0.401	0.998
RPS12A	RPL27AB	0.982	0.867	0.335	0.401	0.998
FIB1	WDR	0.918	0.854	0.672	0.522	0.997
PFL	RPL27AB	0.983	0.774	0	0.32	0.997
RACK1A	RPL27AB	0.982	0.846	0	0	0.997
RPL27AB	RACK1A	0.982	0.846	0	0	0.997
RPL27AB	PFL	0.983	0.774	0	0.32	0.997
WDR	FIB1	0.918	0.854	0.672	0.522	0.997
EMB2107	PBC1	0.503	0.877	0.832	0.674	0.996
PBC1	EMB2107	0.503	0.877	0.832	0.674	0.996
BMS1	FIB1	0.694	0.88	0.678	0.642	0.995
FIB1	BMS1	0.694	0.88	0.678	0.642	0.995
RPL27AB	RPS27AA	0.917	0.847	0.254	0.511	0.994
RPS27AA	RPL27AB	0.917	0.847	0.254	0.511	0.994
RIG	RPL27AB	0.9	0.729	0	0.409	0.982
RPL27AB	RIG	0.9	0.729	0	0.409	0.982
EMB2107	RPS27AA	0.084	0.846	0.673	0.075	0.951
RPS27AA	EMB2107	0.084	0.846	0.673	0.075	0.951
FIB1	RPS12A	0.674	0.561	0.394	0.243	0.925
RPS12A	FIB1	0.674	0.561	0.394	0.243	0.925
FIB1	RPL7AB	0.702	0.496	0.394	0.243	0.922
RPL7AB	FIB1	0.702	0.496	0.394	0.243	0.922
FIB1	RPL6A	0.84	0.052	0	0.076	0.847
RPL6A	FIB1	0.84	0.052	0	0.076	0.847
LPD1	SHM5	0.046	0	0.753	0.39	0.844
SHM5	LPD1	0.046	0	0.753	0.39	0.844
FIB1	RACK1A	0.809	0.069	0	0.189	0.843
RACK1A	FIB1	0.809	0.069	0	0.189	0.843
AAC1	RPL10A	0.75	0.077	0	0.327	0.831
RPL10A	AAC1	0.75	0.077	0	0.327	0.831
FIB1	PFL	0.374	0.7	0	0	0.804
PFL	FIB1	0.374	0.7	0	0	0.804
AXS1	RACK1A	0	0.76	0	0	0.76
RACK1A	AXS1	0	0.76	0	0	0.76
BAS-1	BIP2	0.057	0.52	0	0.409	0.709
BIP2	BAS-1	0.057	0.52	0	0.409	0.709
BIP2	VPS34	0	0.124	0.171	0.587	0.673
VPS34	BIP2	0	0.124	0.171	0.587	0.673
BAS-1	GAPA-2	0.503	0.056	0	0.35	0.668
GAPA-2	BAS-1	0.503	0.056	0	0.35	0.668
TOR	RPL7AB	0.046	0.113	0.078	0.601	0.647
FIB1	RPL21A	0.643	0	0	0	0.643
RPL21A	FIB1	0.643	0	0	0	0.643
ATG7	BIP2	0	0.066	0	0.63	0.64
BIP2	ATG7	0	0.066	0	0.63	0.64
ATG6	BIP2	0	0.09	0	0.609	0.628
BIP2	ATG6	0	0.09	0	0.609	0.628
RPL10A	TPI	0.563	0.183	0	0	0.628
TPI	RPL10A	0.563	0.183	0	0	0.628
BAS-1	TPI	0.128	0.138	0	0.543	0.626
TPI	BAS-1	0.128	0.138	0	0.543	0.626
FIB1	RPS27AA	0.2	0.507	0	0.11	0.618
RPS27AA	FIB1	0.2	0.507	0	0.11	0.618
FIB1	RIG	0.609	0	0	0.051	0.613
ATG10	BAS-1	0	0	0	0.597	0.597
ATG3	BIP2	0.055	0.045	0	0.59	0.597
BAS-1	ATG10	0	0	0	0.597	0.597
BIP2	ATG3	0.055	0.045	0	0.59	0.597
AAC1	RACK1A	0.582	0	0	0.069	0.594
RACK1A	AAC1	0.582	0	0	0.069	0.594
ATG5	BIP2	0	0	0	0.591	0.591
BIP2	ATG5	0	0	0	0.591	0.591
BIP2	TPI	0.107	0.069	0	0.546	0.59
TPI	BIP2	0.107	0.069	0	0.546	0.59
BIP2	GAPA-2	0.05	0.14	0.116	0.488	0.58
BIP2	GAPC2	0.05	0.14	0.116	0.488	0.58
BIP2	GAPCP-2	0.05	0.14	0.116	0.488	0.58
GAPA-2	BIP2	0.05	0.14	0.116	0.488	0.58
GAPC2	BIP2	0.05	0.14	0.116	0.488	0.58
GAPCP-2	BIP2	0.05	0.14	0.116	0.488	0.58
LPD1	TPI	0.082	0	0	0.549	0.569
TPI	LPD1	0.082	0	0	0.549	0.569
GRF4	TOR	0	0.183	0.446	0.108	0.561
TOR	GRF4	0	0.183	0.446	0.108	0.561
AAC1	TPI	0.557	0	0	0	0.557
TPI	AAC1	0.557	0	0	0	0.557
AAC1	RPL6A	0.268	0.131	0	0.349	0.549
RPL6A	AAC1	0.268	0.131	0	0.349	0.549
ATG6	BAS-1	0	0	0	0.543	0.543
BAS-1	ATG6	0	0	0	0.543	0.543
BAS-1	PRC3	0.079	0	0	0.51	0.529
PRC3	BAS-1	0.079	0	0	0.51	0.529
BAS-1	LPD1	0.077	0.053	0.297	0.319	0.525
LPD1	BAS-1	0.077	0.053	0.297	0.319	0.525
FIB1	RPL19A	0.478	0.095	0	0	0.507
RPL19A	FIB1	0.478	0.095	0	0	0.507
FIB1	RPL10AA	0.429	0.087	0	0.124	0.503
RPL10AA	FIB1	0.429	0.087	0	0.124	0.503
FIB1	RPL34A	0.466	0	0	0.106	0.502
RPL34A	FIB1	0.466	0	0	0.106	0.502
BAS-1	RACK1A	0.181	0	0	0.414	0.499
RACK1A	BAS-1	0.181	0	0	0.414	0.499
AAC1	RPL7AB	0.426	0.154	0	0	0.494
RPL7AB	AAC1	0.426	0.154	0	0	0.494
FIB1	RPP1A	0.483	0	0	0	0.483
RPP1A	FIB1	0.483	0	0	0	0.483
RACK1A	SPDS2	0.476	0	0	0	0.476
SPDS2	RACK1A	0.476	0	0	0	0.476
ATG7	EMB2107	0.152	0	0	0.394	0.464
EMB2107	ATG7	0.152	0	0	0.394	0.464
PRC3	TPI	0.122	0	0	0.406	0.456
TPI	PRC3	0.122	0	0	0.406	0.456
AAC1	RPL19A	0.346	0.184	0	0	0.444
RPL19A	AAC1	0.346	0.184	0	0	0.444
BIP2	RACK1A	0.175	0.141	0	0.269	0.436
RACK1A	BIP2	0.175	0.141	0	0.269	0.436
SPDS2	TPI	0.054	0	0	0.415	0.422
TPI	SPDS2	0.054	0	0	0.415	0.422
BIP2	TOR	0	0.124	0.171	0.267	0.421
TOR	BIP2	0	0.124	0.171	0.267	0.421
GAPA-2	LPD1	0.077	0	0	0.395	0.418
LPD1	GAPA-2	0.077	0	0	0.395	0.418
FIB1	RPL10A	0.395	0	0	0.075	0.417
RPL10A	FIB1	0.395	0	0	0.075	0.417
RPL10AA	SPDS2	0.406	0	0	0	0.406
SPDS2	RPL10AA	0.406	0	0	0	0.406
RPL10AA	TPI	0.123	0	0	0.349	0.404
TPI	RPL10AA	0.123	0	0	0.349	0.404
